# Supplementary material for: Computational Screening of Alternaria Metabolites as Potential DPP-4 Inhibitors: ADMET, Molecular Docking, Molecular Dynamics, and Network Pharmacology Analysis
Source: Research Square preprint supplement (doi:10.21203/rs.3.rs-8483182/v1), 2026-01-09

**Supplemetry Data 2**

Molecular Docking result of 33 selected molecules


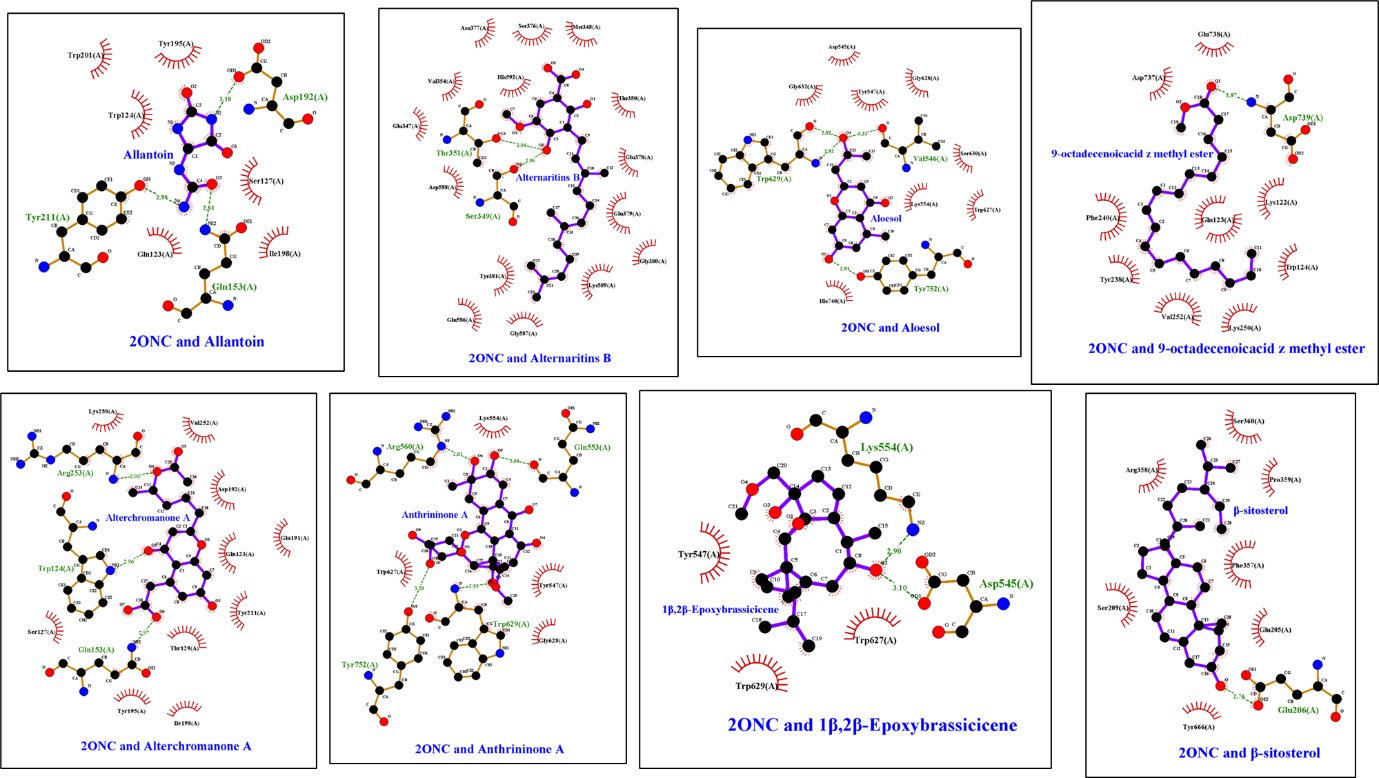


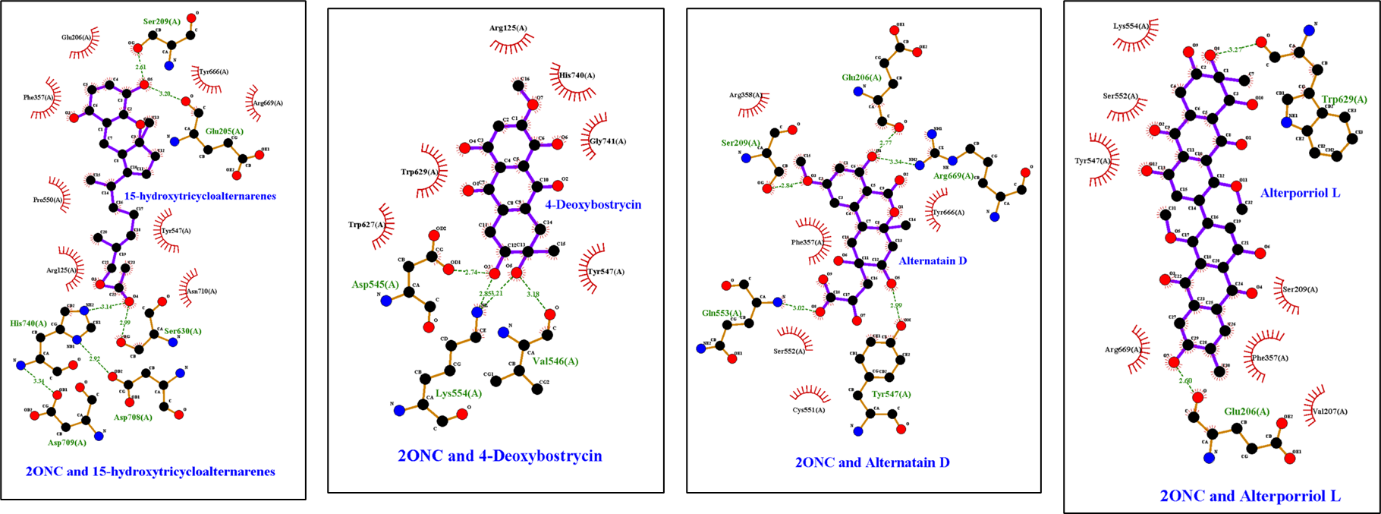


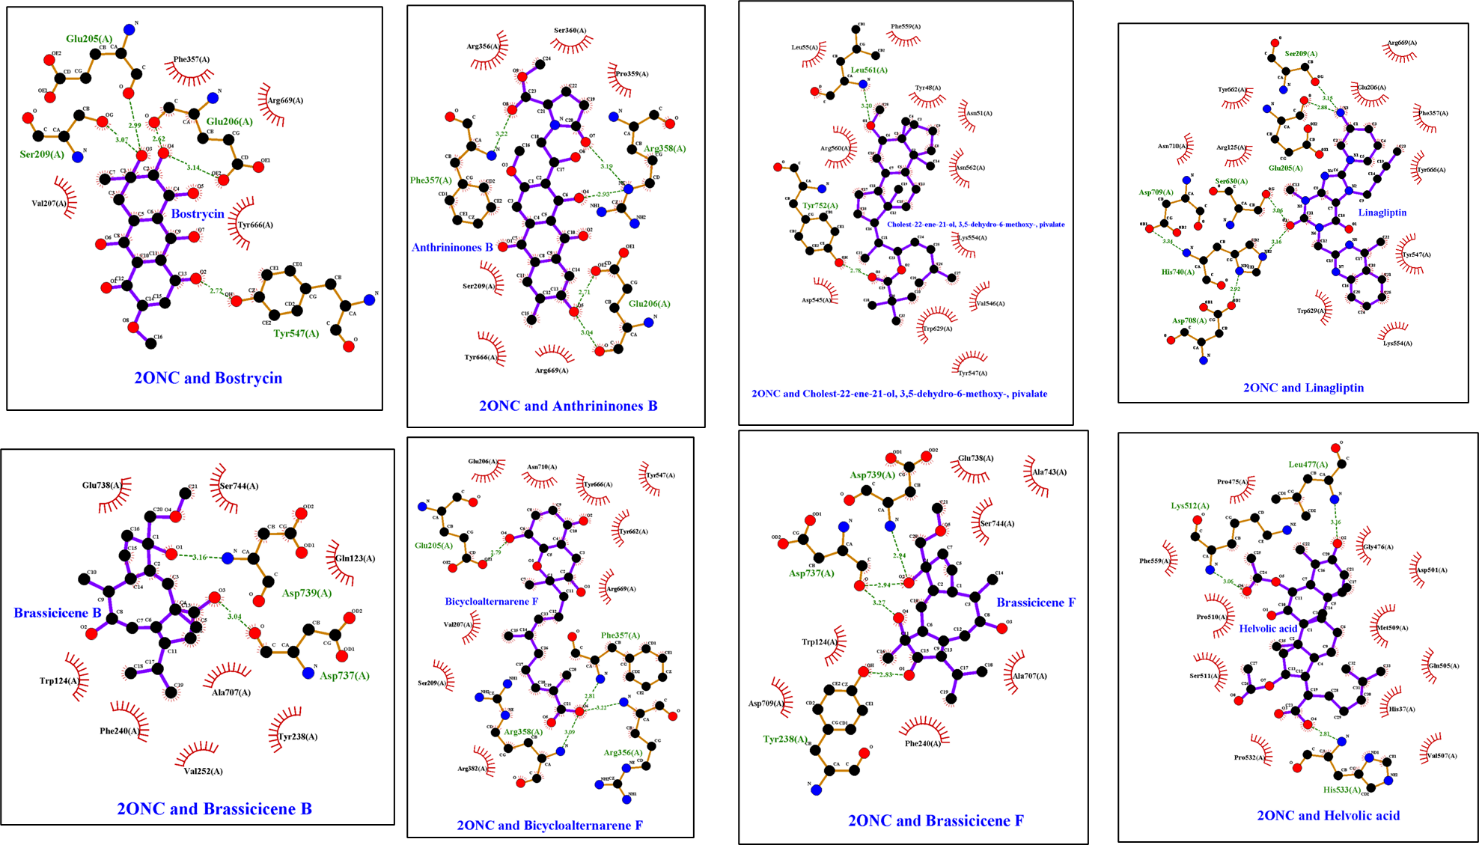


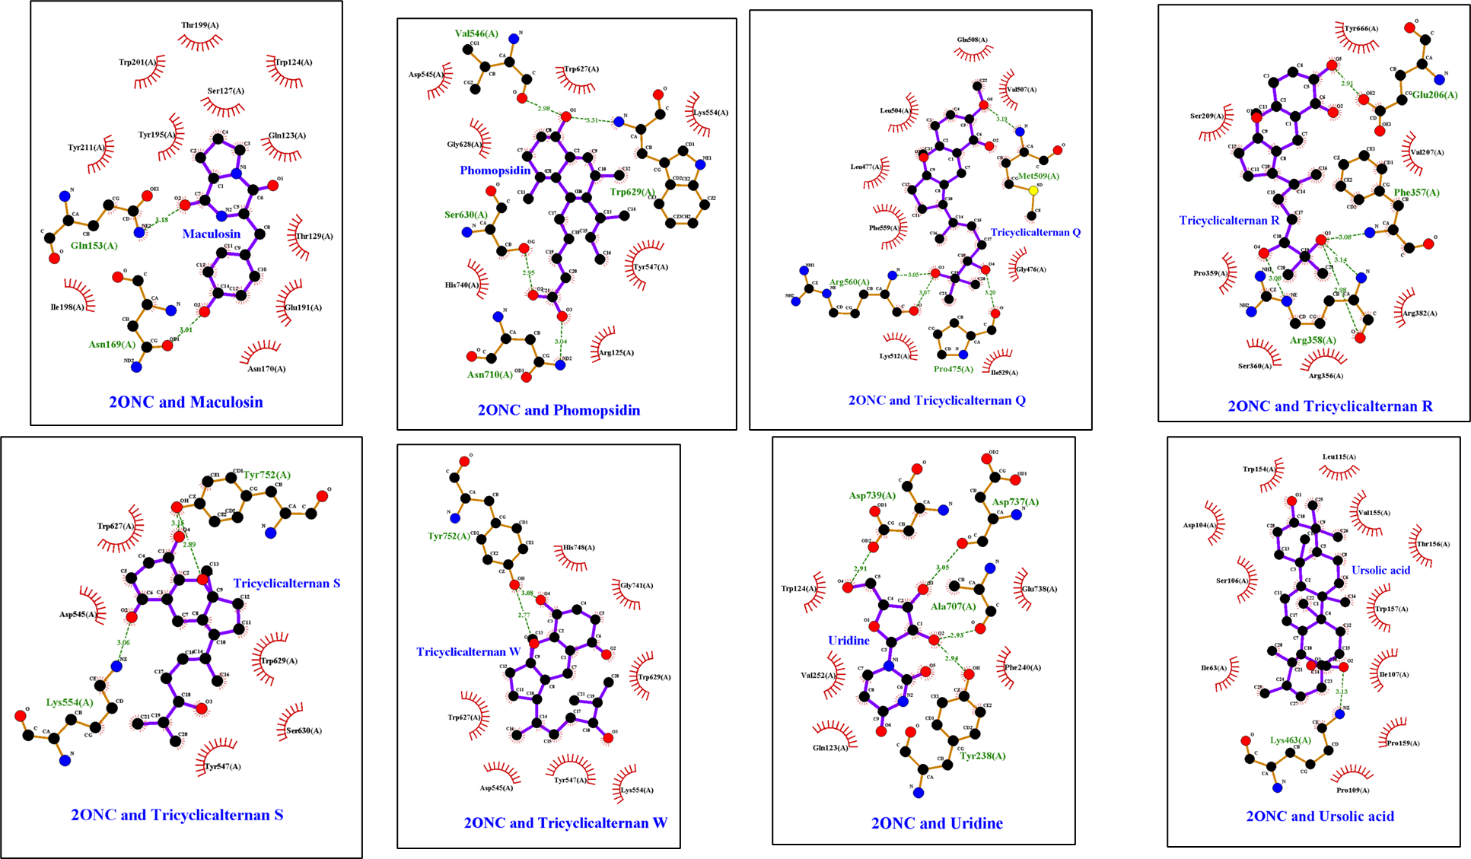


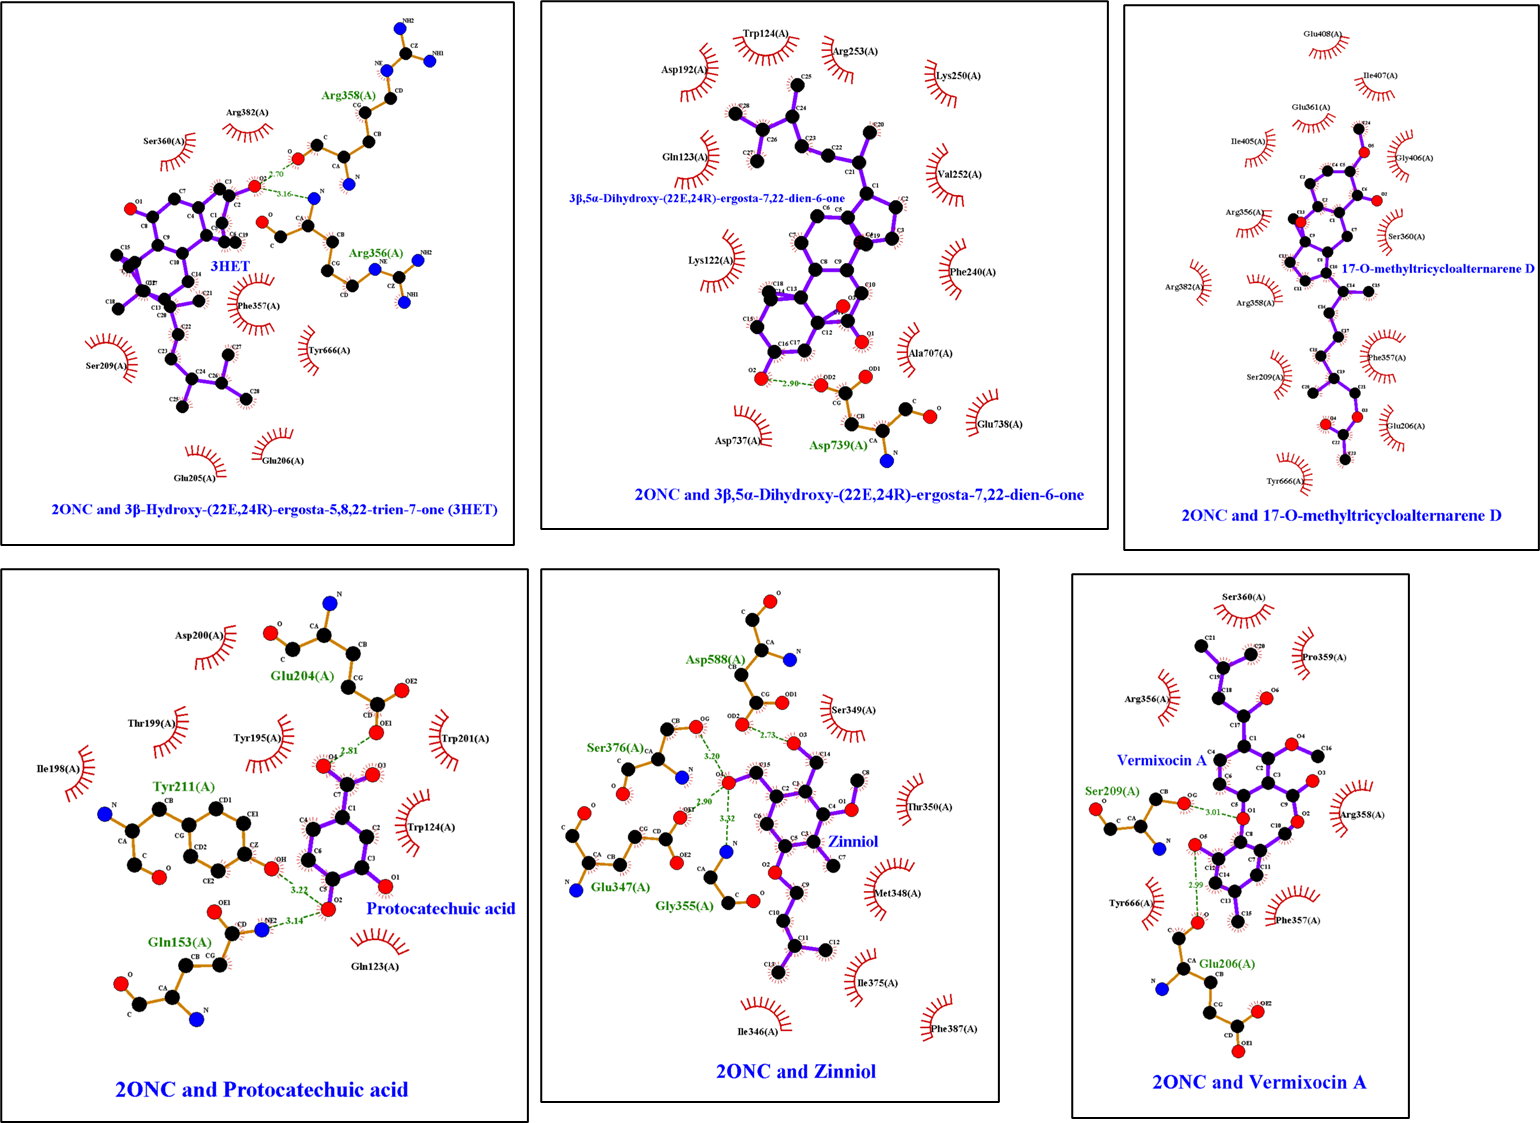


**Molecular dynamics simulation Result**

LigPlot+ analysis of the protein-ligand complexes at the end of 300ns


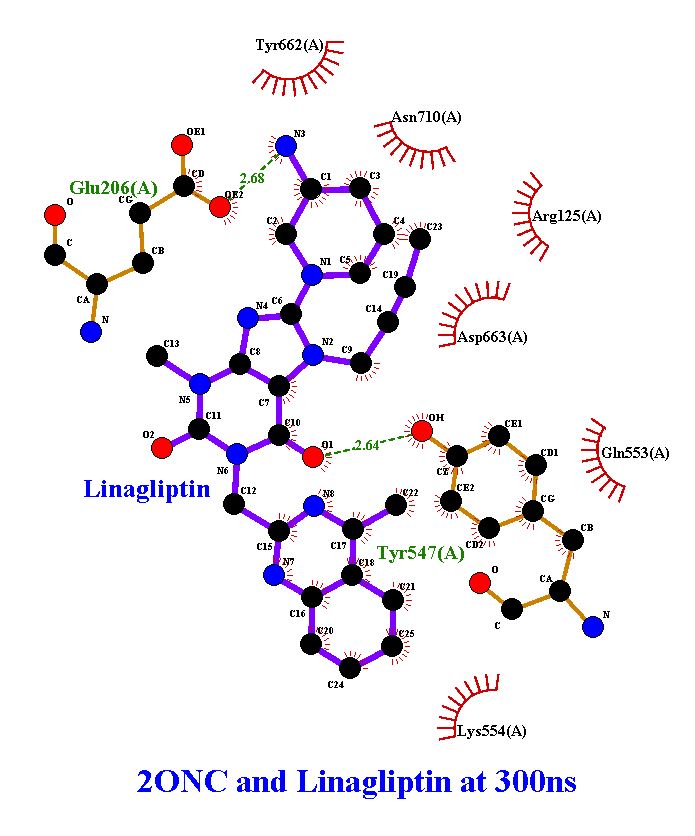

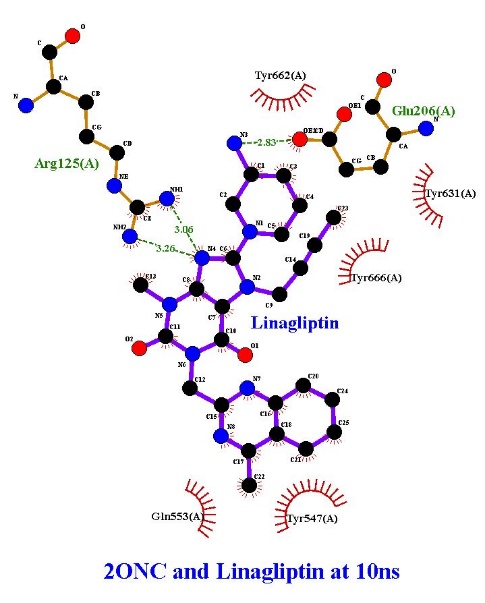


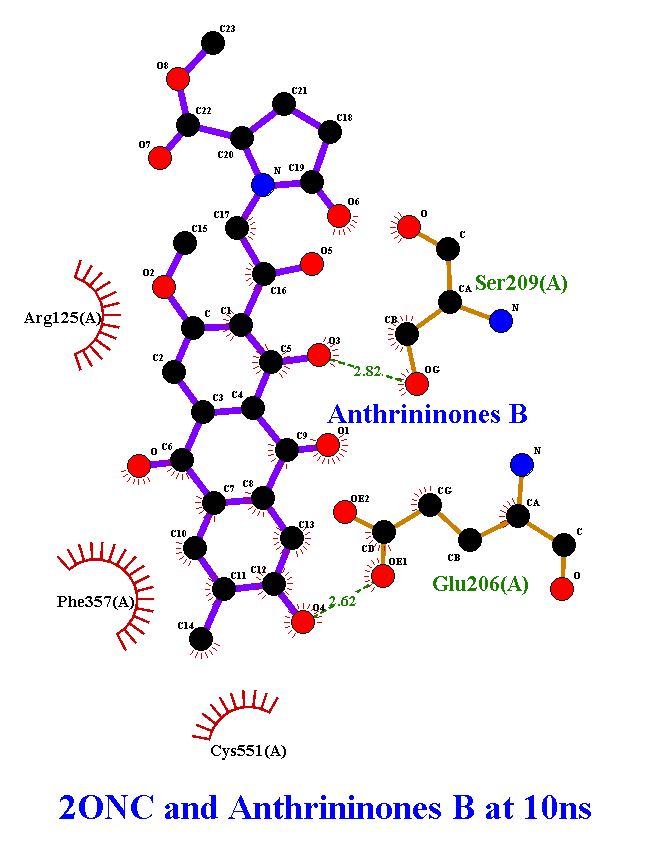


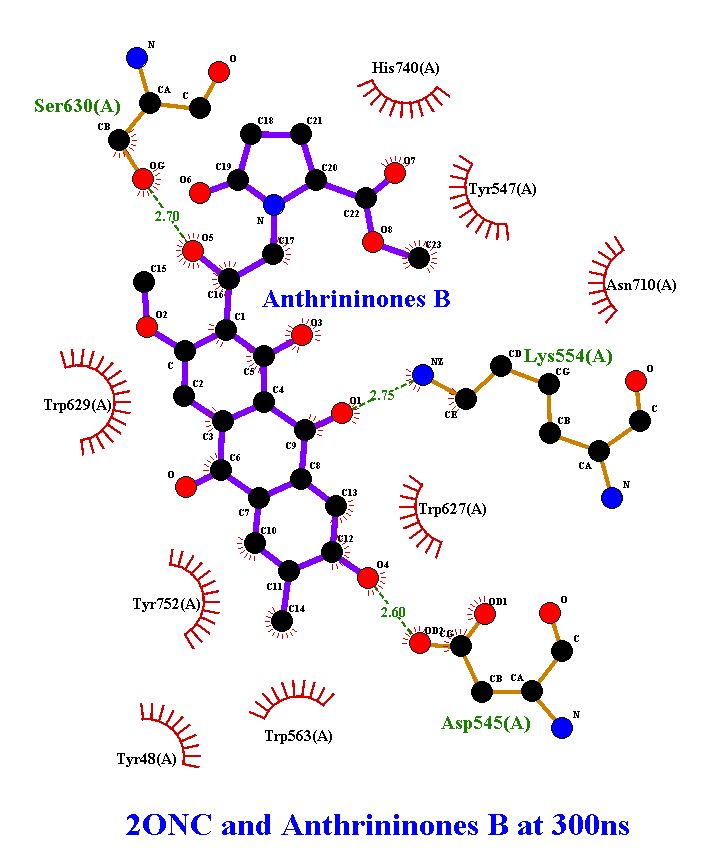


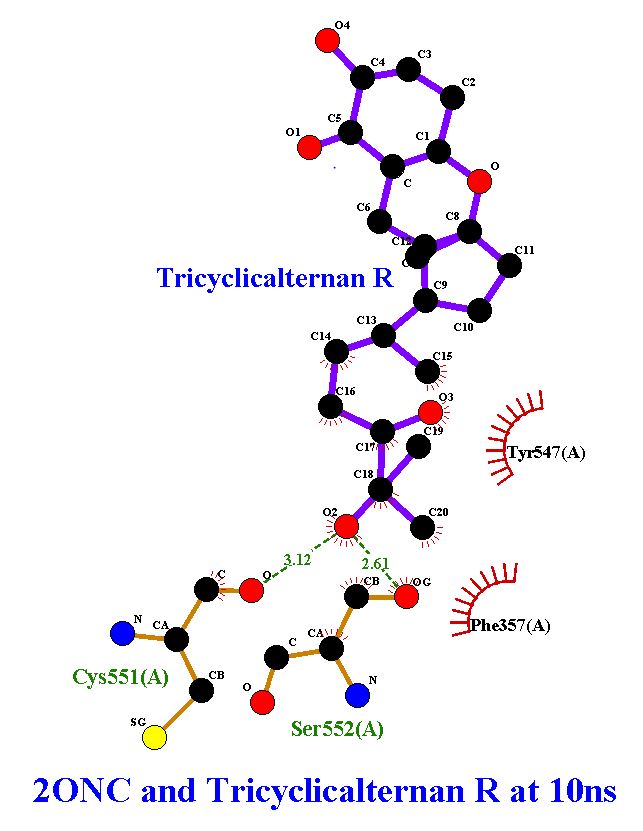


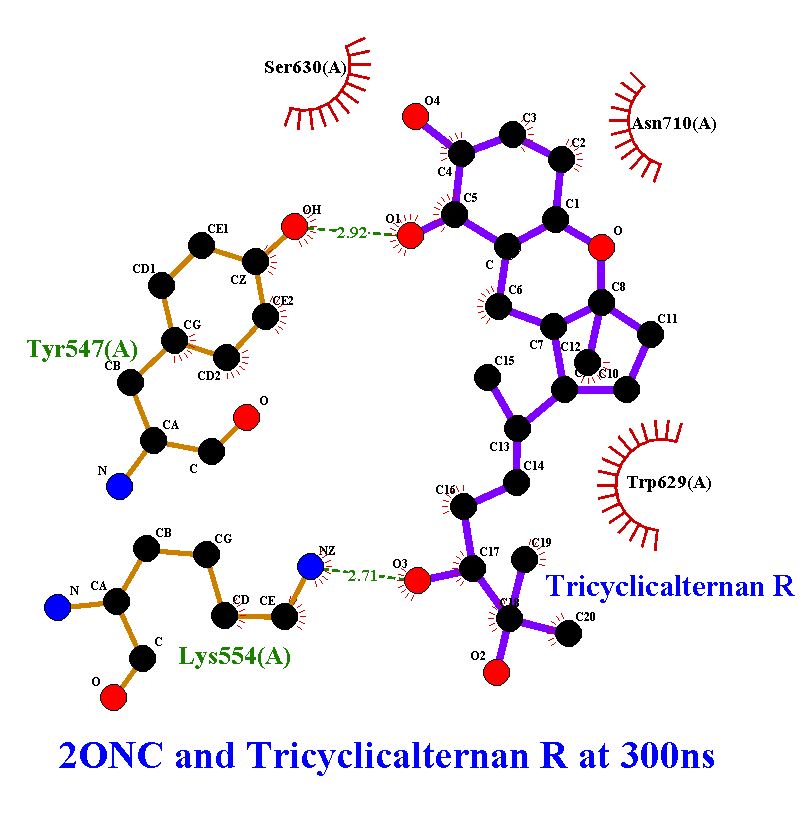


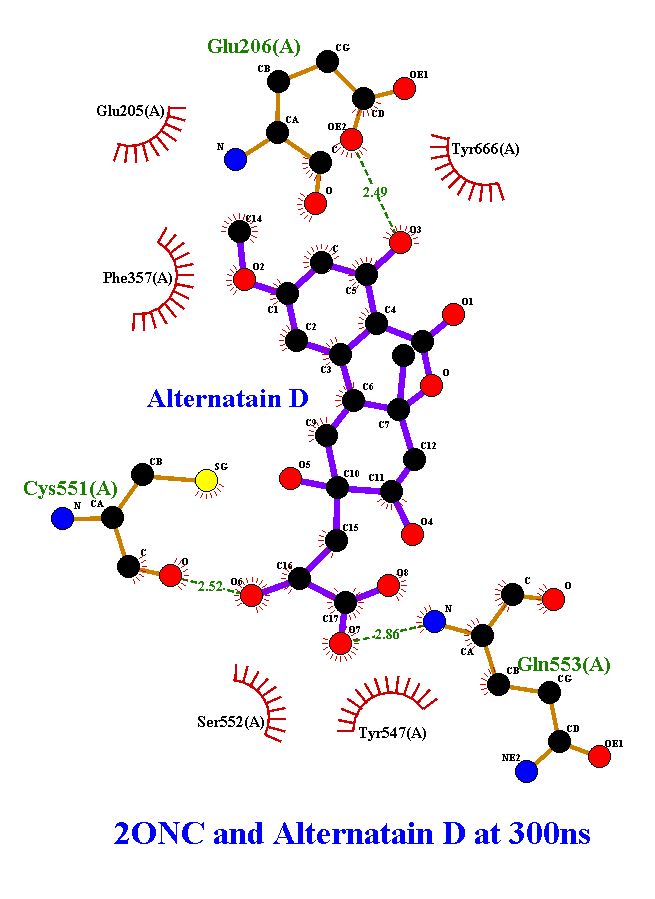

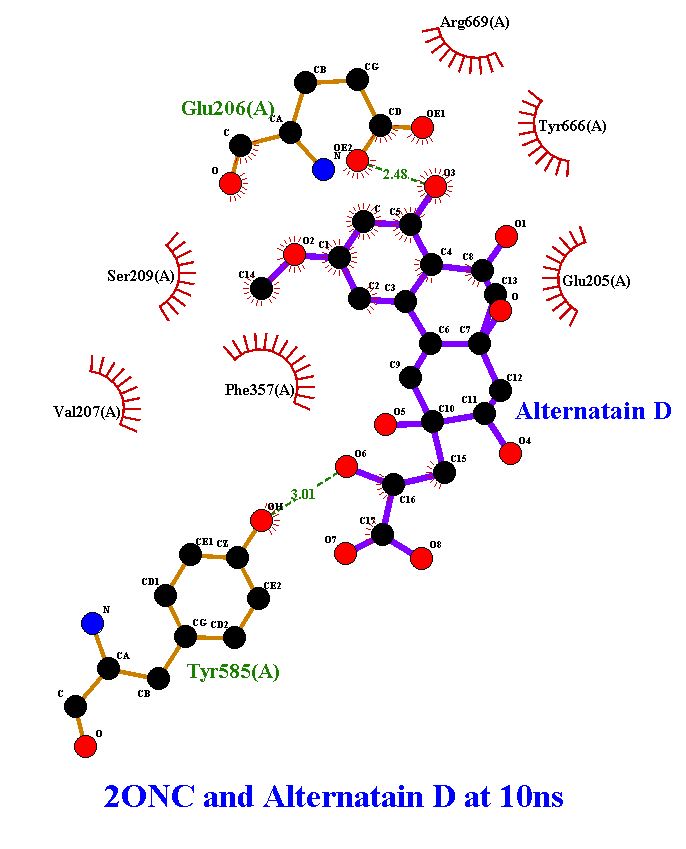


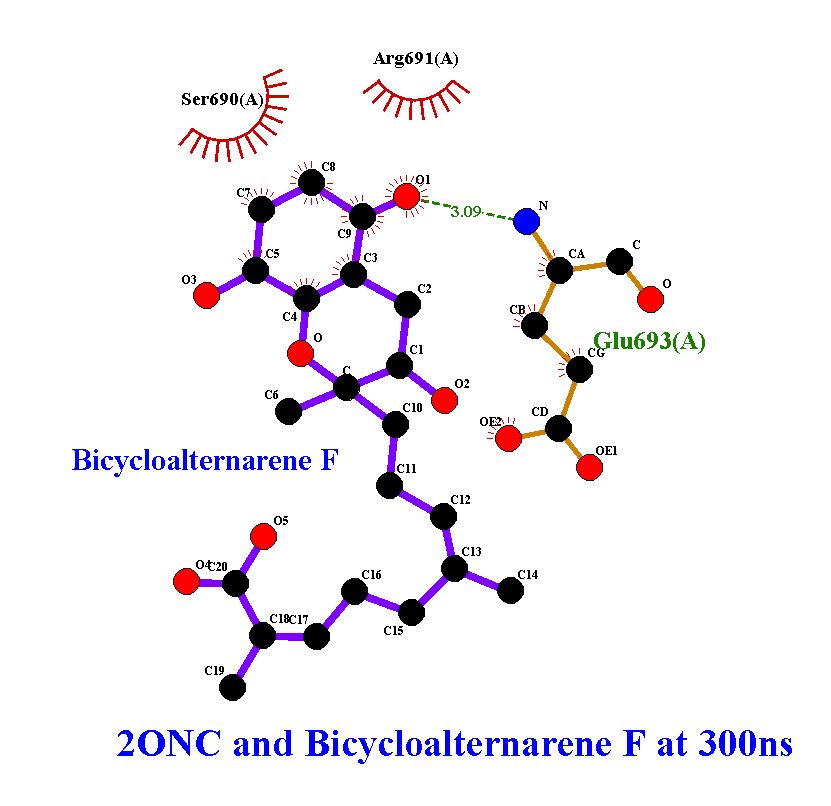

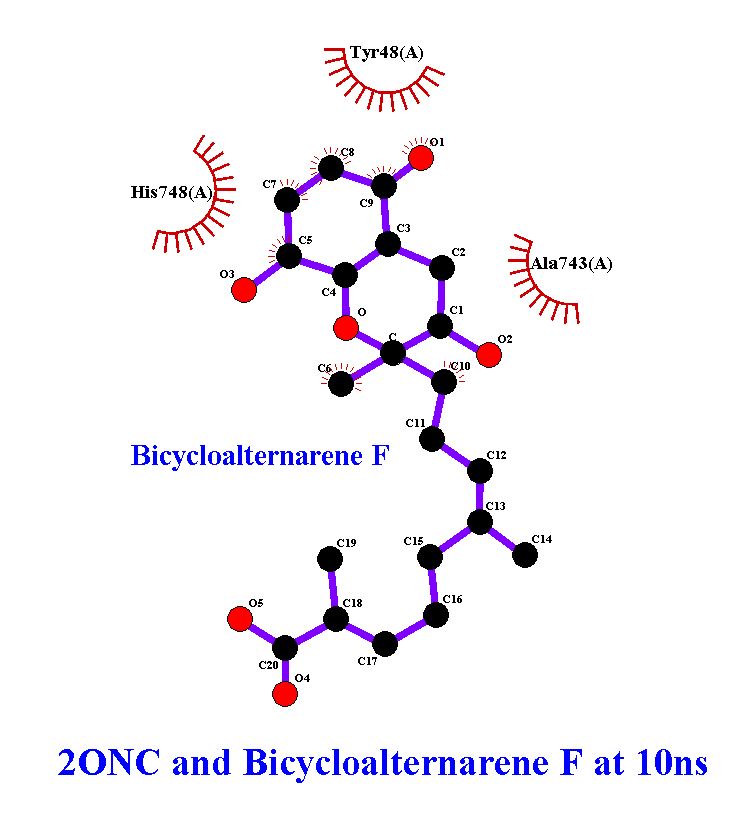


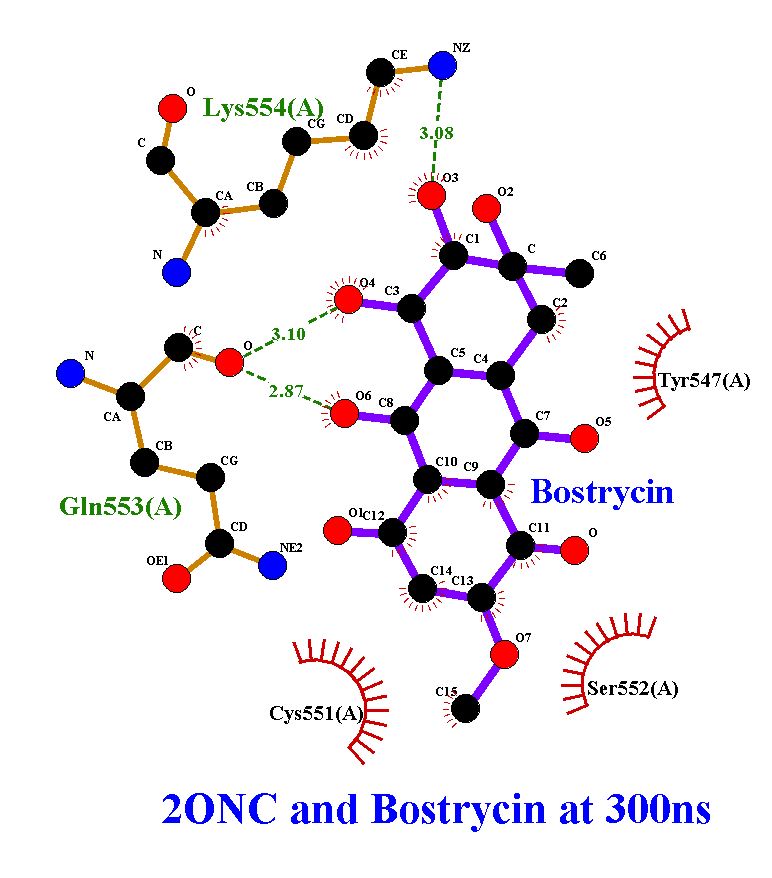

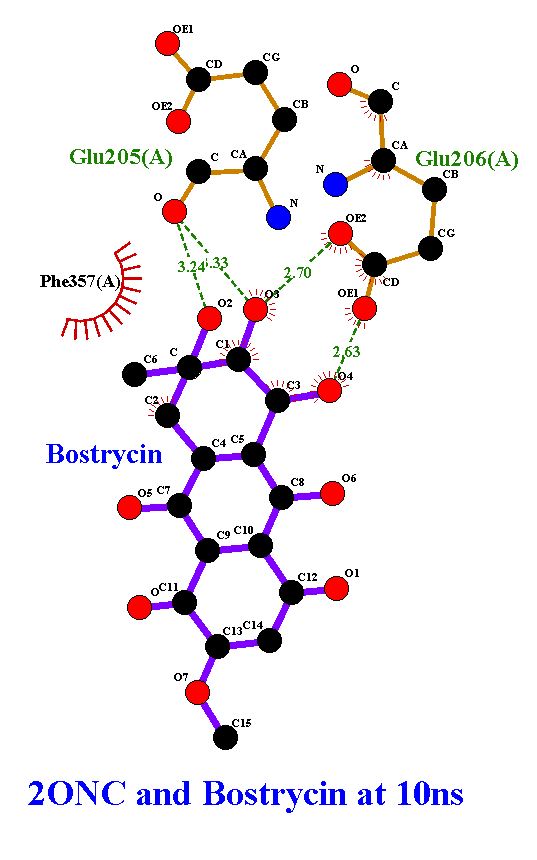

Supplement: Supplementary file 3 [file db388b626dcf926deca31ed7.docx]
