# Supplementary material for: Computational Screening of Alternaria Metabolites as Potential DPP-4 Inhibitors: ADMET, Molecular Docking, Molecular Dynamics, and Network Pharmacology Analysis
Source: Research Square preprint supplement (doi:10.21203/rs.3.rs-8483182/v1), 2026-01-09
Supplement: Supplementary file 1 [file 091d166e77665a7c2023962b.xlsx]

## Sheet: Details
	Computational Screening of Alternaria Metabolites as Potential DPP-4 Inhibitors: ADMET, Molecular Docking, Molecular Dynamics, and Network Pharmacology Analysis
	Piyush Kumar1, Sai Anand Kannakazhi Kantari1*, Malleswara Dharanikota1*
	1 Department of Biosciences, Sri Sathya Sai Institute of Higher Learning, Puttaparthi, Andhra Pradesh, 515134, India. Email: piyushkumar@sssihl.edu.in, kksaianand@sssihl.edu.in, vnsmalleswaradkota@sssihl.edu.in
	* Correspondence: vnsmalleswaradkota@sssihl.edu.in , kksaianand@sssihl.edu.in
	Table of Content
Page No:	Title
N1	Target Prediction of Ligand through 3DSTarPred
N2	Target Prediction of Ligand through AmiActive
N3	Target Prediction of Ligand through SuperPred
N4	Comprehensive list of Traget genes along with the Gene ID
N5	List of T2D genes (GeneCard)
N6	Enriched pathways associated with common genes

## Sheet: N1
mol_id	smiles	rank	pref_name	accession	organism	target_type	max_similarity	max_activity(nM)	overall	sim_ligands_cnt	chembl_id	overlay_sdf
MOL_0	O=C1CC[C@H](C(OC)=O)N1CC(O)C2=C(O)C3=C(C(C(C=C(C)C(O)=C4)=C4C3=O)=O)C=C2OC	1	Purinergic receptor P2Y12	Q9H244	Homo sapiens	SINGLE PROTEIN	0.6573	10000	3.28651	8	CHEMBL42624,CHEMBL40275,CHEMBL41092,CHEMBL1172006,CHEMBL497000,CHEMBL496999,CHEMBL289277,CHEMBL122192	overlay_1_1.sdf
MOL_0	O=C1CC[C@H](C(OC)=O)N1CC(O)C2=C(O)C3=C(C(C(C=C(C)C(O)=C4)=C4C3=O)=O)C=C2OC	2	Monoamine oxidase A	P21397	Homo sapiens	SINGLE PROTEIN	0.65468	8500	3.31963	22	CHEMBL187044,CHEMBL188014,CHEMBL363747,CHEMBL186368,CHEMBL185788,CHEMBL186609,CHEMBL185776,CHEMBL359978,CHEMBL187368,CHEMBL186433,CHEMBL185686,CHEMBL441121,CHEMBL185960,CHEMBL183946,CHEMBL365640,CHEMBL186784,CHEMBL364619,CHEMBL4163351,CHEMBL4208814,CHEMBL483526,CHEMBL457535,CHEMBL4213878	overlay_1_2.sdf
MOL_0	O=C1CC[C@H](C(OC)=O)N1CC(O)C2=C(O)C3=C(C(C(C=C(C)C(O)=C4)=C4C3=O)=O)C=C2OC	3	DNA topoisomerase II alpha	P11388	Homo sapiens	SINGLE PROTEIN	0.63782	2500	3.57311	5	CHEMBL4096982,CHEMBL4061116,CHEMBL4069784,CHEMBL4070811,CHEMBL511712	overlay_1_3.sdf
MOL_0	O=C1CC[C@H](C(OC)=O)N1CC(O)C2=C(O)C3=C(C(C(C=C(C)C(O)=C4)=C4C3=O)=O)C=C2OC	4	Sphingomyelin phosphodiesterase	P17405	Homo sapiens	SINGLE PROTEIN	0.63679	4890	3.38181	2	CHEMBL4160348,CHEMBL4168652	overlay_1_4.sdf
MOL_0	O=C1CC[C@H](C(OC)=O)N1CC(O)C2=C(O)C3=C(C(C(C=C(C)C(O)=C4)=C4C3=O)=O)C=C2OC	5	Poly(ADP-ribose) glycohydrolase	Q86W56	Homo sapiens	SINGLE PROTEIN	0.63028	3300	3.45487	2	CHEMBL4276758,CHEMBL4284056	overlay_1_5.sdf
MOL_0	O=C1CC[C@H](C(OC)=O)N1CC(O)C2=C(O)C3=C(C(C(C=C(C)C(O)=C4)=C4C3=O)=O)C=C2OC	6	Adenosine A2a receptor	P30543	Rattus norvegicus	SINGLE PROTEIN	0.62706	6470	3.25387	4	CHEMBL349609,CHEMBL350469,CHEMBL133741,CHEMBL338723	overlay_1_6.sdf
MOL_0	O=C1CC[C@H](C(OC)=O)N1CC(O)C2=C(O)C3=C(C(C(C=C(C)C(O)=C4)=C4C3=O)=O)C=C2OC	7	7,8-dihydro-8-oxoguanine triphosphatase	P36639	Homo sapiens	SINGLE PROTEIN	0.61579	1700	3.55285	5	CHEMBL506229,CHEMBL260553,CHEMBL4440642,CHEMBL323197,CHEMBL464119	overlay_1_7.sdf
MOL_0	O=C1CC[C@H](C(OC)=O)N1CC(O)C2=C(O)C3=C(C(C(C=C(C)C(O)=C4)=C4C3=O)=O)C=C2OC	8	Serine/threonine-protein kinase TBK1	Q9UHD2	Homo sapiens	SINGLE PROTEIN	0.6139	850	3.72672	27	CHEMBL1096,CHEMBL4290720,CHEMBL4287847,CHEMBL4277195,CHEMBL4285560,CHEMBL4281039,CHEMBL4279379,CHEMBL4277614,CHEMBL4280074,CHEMBL4278101,CHEMBL4292344,CHEMBL4284443,CHEMBL4293403,CHEMBL4290544,CHEMBL4295050,CHEMBL4287304,CHEMBL4278727,CHEMBL4276661,CHEMBL4288939,CHEMBL4285588,CHEMBL4289613,CHEMBL4290024,CHEMBL4279336,CHEMBL4281788,CHEMBL4281733,CHEMBL4282790,CHEMBL4224757	overlay_1_8.sdf
MOL_0	O=C1CC[C@H](C(OC)=O)N1CC(O)C2=C(O)C3=C(C(C(C=C(C)C(O)=C4)=C4C3=O)=O)C=C2OC	9	Inhibitor of nuclear factor kappa B kinase epsilon subunit	Q14164	Homo sapiens	SINGLE PROTEIN	0.6139	5100	3.24902	22	CHEMBL1096,CHEMBL4290720,CHEMBL4287847,CHEMBL4277195,CHEMBL4285560,CHEMBL4281039,CHEMBL4279379,CHEMBL4277614,CHEMBL4280074,CHEMBL4292344,CHEMBL4284443,CHEMBL4293403,CHEMBL4290544,CHEMBL4295050,CHEMBL4278727,CHEMBL4276661,CHEMBL4288939,CHEMBL4285588,CHEMBL4289613,CHEMBL4279336,CHEMBL4281788,CHEMBL4281733	overlay_1_9.sdf
MOL_0	O=C1CC[C@H](C(OC)=O)N1CC(O)C2=C(O)C3=C(C(C(C=C(C)C(O)=C4)=C4C3=O)=O)C=C2OC	10	Protein-tyrosine phosphatase 1B	P18031	Homo sapiens	SINGLE PROTEIN	0.6082	5100	3.21888	9	CHEMBL4214309,CHEMBL4208135,CHEMBL4203265,CHEMBL260553,CHEMBL4211682,CHEMBL1782241,CHEMBL323197,CHEMBL551842,CHEMBL4086905	overlay_1_10.sdf
MOL_0	O=C1CC[C@H](C(OC)=O)N1CC(O)C2=C(O)C3=C(C(C(C=C(C)C(O)=C4)=C4C3=O)=O)C=C2OC	11	Beta-1 adrenergic receptor	P18090	Rattus norvegicus	SINGLE PROTEIN	0.60763	7700	3.10712	7	CHEMBL517532,CHEMBL4128231,CHEMBL479644,CHEMBL482397,CHEMBL482396,CHEMBL4129458,CHEMBL481799	overlay_1_11.sdf
MOL_0	O=C1CC[C@H](C(OC)=O)N1CC(O)C2=C(O)C3=C(C(C(C=C(C)C(O)=C4)=C4C3=O)=O)C=C2OC	12	Adrenergic receptor alpha-1	P15823	Rattus norvegicus	PROTEIN FAMILY	0.60763	4600	3.24306	16	CHEMBL517532,CHEMBL481414,CHEMBL479644,CHEMBL481415,CHEMBL482396,CHEMBL4129458,CHEMBL103500,CHEMBL310712,CHEMBL73074,CHEMBL72794,CHEMBL12713,CHEMBL321964,CHEMBL353705,CHEMBL307163,CHEMBL149493,CHEMBL70319	overlay_1_12.sdf
MOL_0	O=C1CC[C@H](C(OC)=O)N1CC(O)C2=C(O)C3=C(C(C(C=C(C)C(O)=C4)=C4C3=O)=O)C=C2OC	13	Anandamide amidohydrolase	P97612	Rattus norvegicus	SINGLE PROTEIN	0.60071	5909	3.14078	20	CHEMBL184408,CHEMBL184611,CHEMBL188509,CHEMBL188463,CHEMBL76915,CHEMBL186904,CHEMBL446837,CHEMBL362905,CHEMBL505895,CHEMBL431202,CHEMBL360405,CHEMBL188301,CHEMBL487317,CHEMBL184293,CHEMBL359796,CHEMBL188733,CHEMBL451174,CHEMBL186305,CHEMBL184238,CHEMBL189342	overlay_1_13.sdf
			Filter of max similarity greater than or equall = 0.6

## Sheet: N2
target_id	standard_type	target_name	smiles	treshold	prob_inactive	prob_active	reliability	MCC	precision
CHEMBL3817	Ki	Bcl2-antagonist of cell death (BAD)	COC(=O)[C@H]1CCC(=O)N1CC(O)C1=C(O)C2=C(C=C1OC)C(=O)C1=C(C=C(O)C(C)=C1)C2=O	5.80475	0.0712695	0.928731	unreliable	0.807735	0.95
CHEMBL233	ED50	Mu opioid receptor	COC(=O)[C@H]1CCC(=O)N1CC(O)C1=C(O)C2=C(C=C1OC)C(=O)C1=C(C=C(O)C(C)=C1)C2=O	6.39298	0.075	0.925	unreliable	0.850378	1
CHEMBL3421	IC50	Phosphodiesterase 1A	COC(=O)[C@H]1CCC(=O)N1CC(O)C1=C(O)C2=C(C=C1OC)C(=O)C1=C(C=C(O)C(C)=C1)C2=O	4.94897	0.0810811	0.918919	unreliable	0.777866	0.932381
CHEMBL2176772	IC50	E3 ubiquitin-protein ligase TRIM33	COC(=O)[C@H]1CCC(=O)N1CC(O)C1=C(O)C2=C(C=C1OC)C(=O)C1=C(C=C(O)C(C)=C1)C2=O	4.6389	0.0860215	0.913978	unreliable	0.61205	0.81763
CHEMBL2882	Ki	Histamine H2 receptor	COC(=O)[C@H]1CCC(=O)N1CC(O)C1=C(O)C2=C(C=C1OC)C(=O)C1=C(C=C(O)C(C)=C1)C2=O	4.96563	0.0869565	0.913043	unreliable	0.732344	0.921429
CHEMBL614342	EC50	MEF	COC(=O)[C@H]1CCC(=O)N1CC(O)C1=C(O)C2=C(C=C1OC)C(=O)C1=C(C=C(O)C(C)=C1)C2=O	4.54149	0.105263	0.894737	unreliable	0.563265	0.811429
CHEMBL379	CC50	Hepatitis C virus	COC(=O)[C@H]1CCC(=O)N1CC(O)C1=C(O)C2=C(C=C1OC)C(=O)C1=C(C=C(O)C(C)=C1)C2=O	3.57721	0.108571	0.891429	unreliable	0.865982	1
CHEMBL614547	IC50	CEM-DNR	COC(=O)[C@H]1CCC(=O)N1CC(O)C1=C(O)C2=C(C=C1OC)C(=O)C1=C(C=C(O)C(C)=C1)C2=O	4.6108	0.122995	0.877005	unreliable	0.785162	0.882143
CHEMBL4263	Ki	Acetolactate synthase	COC(=O)[C@H]1CCC(=O)N1CC(O)C1=C(O)C2=C(C=C1OC)C(=O)C1=C(C=C(O)C(C)=C1)C2=O	3.71782	0.135593	0.864407	unreliable	0.959057	0.963333
CHEMBL613272	ED50	Rhizoctonia solani	COC(=O)[C@H]1CCC(=O)N1CC(O)C1=C(O)C2=C(C=C1OC)C(=O)C1=C(C=C(O)C(C)=C1)C2=O	3.24133	0.140485	0.859515	unreliable	0.559761	0.826429
CHEMBL3381	IC50	Small conductance calcium-activated potassium channel protein 3	COC(=O)[C@H]1CCC(=O)N1CC(O)C1=C(O)C2=C(C=C1OC)C(=O)C1=C(C=C(O)C(C)=C1)C2=O	5.37622	0.144	0.856	unreliable	0.664273	0.833333
CHEMBL614774	ED50	T-24	COC(=O)[C@H]1CCC(=O)N1CC(O)C1=C(O)C2=C(C=C1OC)C(=O)C1=C(C=C(O)C(C)=C1)C2=O	3.97803	0.14781	0.85219	unreliable	0.588829	0.846111
CHEMBL394	TD50	HCT-116	COC(=O)[C@H]1CCC(=O)N1CC(O)C1=C(O)C2=C(C=C1OC)C(=O)C1=C(C=C(O)C(C)=C1)C2=O	4.70498	0.15	0.85	unreliable	0.845033	0.96
CHEMBL2548	IC50	Neuropeptide Y receptor type 5	COC(=O)[C@H]1CCC(=O)N1CC(O)C1=C(O)C2=C(C=C1OC)C(=O)C1=C(C=C(O)C(C)=C1)C2=O	7.73574	0.151351	0.848649	unreliable	0.725365	0.98
CHEMBL3024	EC50	Serine/threonine-protein kinase PLK1	COC(=O)[C@H]1CCC(=O)N1CC(O)C1=C(O)C2=C(C=C1OC)C(=O)C1=C(C=C(O)C(C)=C1)C2=O	4.49373	0.15443	0.84557	unreliable	0.815727	0.983333
CHEMBL5866	IC50	Catenin beta-1	COC(=O)[C@H]1CCC(=O)N1CC(O)C1=C(O)C2=C(C=C1OC)C(=O)C1=C(C=C(O)C(C)=C1)C2=O	4.82977	0.154734	0.845266	unreliable	0.62927	0.787356
CHEMBL614326	IC50	MCF7-DOX	COC(=O)[C@H]1CCC(=O)N1CC(O)C1=C(O)C2=C(C=C1OC)C(=O)C1=C(C=C(O)C(C)=C1)C2=O	4.33519	0.170616	0.829384	unreliable	0.860328	1
CHEMBL612677	EC50	Human coxsackievirus B1	COC(=O)[C@H]1CCC(=O)N1CC(O)C1=C(O)C2=C(C=C1OC)C(=O)C1=C(C=C(O)C(C)=C1)C2=O	5.34841	0.179724	0.820276	unreliable	1	1
CHEMBL614720	IC50	L5178Y	COC(=O)[C@H]1CCC(=O)N1CC(O)C1=C(O)C2=C(C=C1OC)C(=O)C1=C(C=C(O)C(C)=C1)C2=O	5.00386	0.181185	0.818815	unreliable	0.718028	0.803576
CHEMBL5607	IC50	Rhodopsin kinase	COC(=O)[C@H]1CCC(=O)N1CC(O)C1=C(O)C2=C(C=C1OC)C(=O)C1=C(C=C(O)C(C)=C1)C2=O	5.04105	0.181336	0.818664	unreliable	0.657735	0.7
CHEMBL6052	IC50	Transforming protein RhoA	COC(=O)[C@H]1CCC(=O)N1CC(O)C1=C(O)C2=C(C=C1OC)C(=O)C1=C(C=C(O)C(C)=C1)C2=O	4.97914	0.188462	0.811538	unreliable	0.572122	0.9
CHEMBL2073676	Ki	Canalicular multispecific organic anion transporter 1	COC(=O)[C@H]1CCC(=O)N1CC(O)C1=C(O)C2=C(C=C1OC)C(=O)C1=C(C=C(O)C(C)=C1)C2=O	4.07493	0.190141	0.809859	unreliable	0.620583	0.802262
CHEMBL5378	IC50	P-selectin	COC(=O)[C@H]1CCC(=O)N1CC(O)C1=C(O)C2=C(C=C1OC)C(=O)C1=C(C=C(O)C(C)=C1)C2=O	4.10416	0.190789	0.809211	unreliable	0.855211	0.92305
CHEMBL6129	IC50	Diacylglycerol O-acyltransferase 1	COC(=O)[C@H]1CCC(=O)N1CC(O)C1=C(O)C2=C(C=C1OC)C(=O)C1=C(C=C(O)C(C)=C1)C2=O	5.55103	0.191275	0.808725	unreliable	0.927904	0.941667
CHEMBL4523999	IC50	mTORC2	COC(=O)[C@H]1CCC(=O)N1CC(O)C1=C(O)C2=C(C=C1OC)C(=O)C1=C(C=C(O)C(C)=C1)C2=O	6.82985	0.191842	0.808158	unreliable	0.593574	0.767165
CHEMBL327	Ki	Alpha-2a adrenergic receptor	COC(=O)[C@H]1CCC(=O)N1CC(O)C1=C(O)C2=C(C=C1OC)C(=O)C1=C(C=C(O)C(C)=C1)C2=O	5.72055	0.194357	0.805643	unreliable	0.835085	0.8875
CHEMBL614912	GI50	SK-HEP1	COC(=O)[C@H]1CCC(=O)N1CC(O)C1=C(O)C2=C(C=C1OC)C(=O)C1=C(C=C(O)C(C)=C1)C2=O	4.54232	0.194444	0.805556	unreliable	1	1
CHEMBL2096677	IC50	Phosphoglycerate kinase	COC(=O)[C@H]1CCC(=O)N1CC(O)C1=C(O)C2=C(C=C1OC)C(=O)C1=C(C=C(O)C(C)=C1)C2=O	3.20245	0.196409	0.803591	unreliable	0.796424	0.960833
CHEMBL3640	IC50	3-oxoacyl-[acyl-carrier-protein] synthase III	COC(=O)[C@H]1CCC(=O)N1CC(O)C1=C(O)C2=C(C=C1OC)C(=O)C1=C(C=C(O)C(C)=C1)C2=O	4.35946	0.19797	0.80203	unreliable	0.668037	1
CHEMBL614998	IC50	H22	COC(=O)[C@H]1CCC(=O)N1CC(O)C1=C(O)C2=C(C=C1OC)C(=O)C1=C(C=C(O)C(C)=C1)C2=O	4.6951	0.198157	0.801843	unreliable	0.557244	0.819524
CHEMBL5742	IC50	Translocator protein	COC(=O)[C@H]1CCC(=O)N1CC(O)C1=C(O)C2=C(C=C1OC)C(=O)C1=C(C=C(O)C(C)=C1)C2=O	1.46107	0.2	0.8	unreliable	0.644225	0.886706
CHEMBL2722	EC50	Cytochrome P450 11B2	COC(=O)[C@H]1CCC(=O)N1CC(O)C1=C(O)C2=C(C=C1OC)C(=O)C1=C(C=C(O)C(C)=C1)C2=O	7.59977	0.204921	0.795079	unreliable	0.603161	0.834957
CHEMBL613759	CC50	Human rhinovirus 14	COC(=O)[C@H]1CCC(=O)N1CC(O)C1=C(O)C2=C(C=C1OC)C(=O)C1=C(C=C(O)C(C)=C1)C2=O	3.97542	0.204952	0.795048	unreliable	0.565755	0.896429
CHEMBL614342	CC50	MEF	COC(=O)[C@H]1CCC(=O)N1CC(O)C1=C(O)C2=C(C=C1OC)C(=O)C1=C(C=C(O)C(C)=C1)C2=O	4.00758	0.207944	0.792056	unreliable	0.71547	0.8
CHEMBL2109238	IC50	Neuronal acetylcholine receptor; alpha9/alpha10	COC(=O)[C@H]1CCC(=O)N1CC(O)C1=C(O)C2=C(C=C1OC)C(=O)C1=C(C=C(O)C(C)=C1)C2=O	7.5275	0.20904	0.79096	unreliable	0.573921	0.801667
CHEMBL4915	Kd	Galectin-1	COC(=O)[C@H]1CCC(=O)N1CC(O)C1=C(O)C2=C(C=C1OC)C(=O)C1=C(C=C(O)C(C)=C1)C2=O	3.75781	0.212121	0.787879	unreliable	0.65003	0.821795
CHEMBL2380189	IC50	Poly [ADP-ribose] polymerase 11	COC(=O)[C@H]1CCC(=O)N1CC(O)C1=C(O)C2=C(C=C1OC)C(=O)C1=C(C=C(O)C(C)=C1)C2=O	5.09961	0.213675	0.786325	unreliable	0.620415	0.85
CHEMBL2366865	IC50	Human immunodeficiency virus type 2 (ISOLATE ROD)	COC(=O)[C@H]1CCC(=O)N1CC(O)C1=C(O)C2=C(C=C1OC)C(=O)C1=C(C=C(O)C(C)=C1)C2=O	4.53291	0.216279	0.783721	unreliable	0.829549	0.930035
CHEMBL2049	Kd	Oxytocin receptor	COC(=O)[C@H]1CCC(=O)N1CC(O)C1=C(O)C2=C(C=C1OC)C(=O)C1=C(C=C(O)C(C)=C1)C2=O	7.70807	0.218513	0.781487	unreliable	0.534376	0.801667
CHEMBL614335	LD50	MDA-MB-468	COC(=O)[C@H]1CCC(=O)N1CC(O)C1=C(O)C2=C(C=C1OC)C(=O)C1=C(C=C(O)C(C)=C1)C2=O	4.25592	0.219231	0.780769	unreliable	0.597153	0.863095
CHEMBL613703	IC50	Peritoneal macrophage cells	COC(=O)[C@H]1CCC(=O)N1CC(O)C1=C(O)C2=C(C=C1OC)C(=O)C1=C(C=C(O)C(C)=C1)C2=O	5.09357	0.21988	0.78012	unreliable	0.646509	0.86119
CHEMBL2111188	GI50	Mycobacterium tuberculosis H37Rv	COC(=O)[C@H]1CCC(=O)N1CC(O)C1=C(O)C2=C(C=C1OC)C(=O)C1=C(C=C(O)C(C)=C1)C2=O	5.68272	0.220158	0.779842	unreliable	0.763144	0.95
CHEMBL372	Kd	Homo sapiens	COC(=O)[C@H]1CCC(=O)N1CC(O)C1=C(O)C2=C(C=C1OC)C(=O)C1=C(C=C(O)C(C)=C1)C2=O	6.78398	0.220648	0.779352	unreliable	0.518266	0.797143
CHEMBL372	ED50	Homo sapiens	COC(=O)[C@H]1CCC(=O)N1CC(O)C1=C(O)C2=C(C=C1OC)C(=O)C1=C(C=C(O)C(C)=C1)C2=O	5.65328	0.221925	0.778075	unreliable	0.705619	0.861667
CHEMBL2366	IC50	Trypsin	COC(=O)[C@H]1CCC(=O)N1CC(O)C1=C(O)C2=C(C=C1OC)C(=O)C1=C(C=C(O)C(C)=C1)C2=O	4.51562	0.225397	0.774603	unreliable	0.543783	0.758333
CHEMBL612359	EC50	Human immunodeficiency virus 3	COC(=O)[C@H]1CCC(=O)N1CC(O)C1=C(O)C2=C(C=C1OC)C(=O)C1=C(C=C(O)C(C)=C1)C2=O	5.80444	0.228894	0.771106	unreliable	0.533198	0.738034
CHEMBL3108638	IC50	Transcription intermediary factor 1-alpha	COC(=O)[C@H]1CCC(=O)N1CC(O)C1=C(O)C2=C(C=C1OC)C(=O)C1=C(C=C(O)C(C)=C1)C2=O	4.98368	0.231481	0.768519	unreliable	0.782539	0.907644
CHEMBL3071	Ki	Dopamine D1 receptor	COC(=O)[C@H]1CCC(=O)N1CC(O)C1=C(O)C2=C(C=C1OC)C(=O)C1=C(C=C(O)C(C)=C1)C2=O	5.82461	0.232068	0.767932	unreliable	0.746876	0.916667
CHEMBL4106139	IC50	GroEL/GroES	COC(=O)[C@H]1CCC(=O)N1CC(O)C1=C(O)C2=C(C=C1OC)C(=O)C1=C(C=C(O)C(C)=C1)C2=O	4.69469	0.233725	0.766275	unreliable	0.563804	0.75687
CHEMBL3882	EC50	Hexokinase type IV	COC(=O)[C@H]1CCC(=O)N1CC(O)C1=C(O)C2=C(C=C1OC)C(=O)C1=C(C=C(O)C(C)=C1)C2=O	5.89619	0.233918	0.766082	unreliable	0.774592	0.95
CHEMBL613159	IC50	Toxoplasma gondii RH	COC(=O)[C@H]1CCC(=O)N1CC(O)C1=C(O)C2=C(C=C1OC)C(=O)C1=C(C=C(O)C(C)=C1)C2=O	5.7121	0.242152	0.757848	unreliable	0.602319	0.826667
CHEMBL4651287	EC50	Corpus cavernosum	COC(=O)[C@H]1CCC(=O)N1CC(O)C1=C(O)C2=C(C=C1OC)C(=O)C1=C(C=C(O)C(C)=C1)C2=O	6.65018	0.246217	0.753783	unreliable	0.660587	0.895
CHEMBL4296577	EC50	Marburgvirus	COC(=O)[C@H]1CCC(=O)N1CC(O)C1=C(O)C2=C(C=C1OC)C(=O)C1=C(C=C(O)C(C)=C1)C2=O	4.99998	0.246231	0.753769	unreliable	0.848765	0.941667
CHEMBL612880	ED50	Leishmania mexicana	COC(=O)[C@H]1CCC(=O)N1CC(O)C1=C(O)C2=C(C=C1OC)C(=O)C1=C(C=C(O)C(C)=C1)C2=O	4.82572	0.25	0.75	unreliable	0.557026	0.79881
CHEMBL4483264	IC50	NCM460	COC(=O)[C@H]1CCC(=O)N1CC(O)C1=C(O)C2=C(C=C1OC)C(=O)C1=C(C=C(O)C(C)=C1)C2=O	4.30166	0.250946	0.749054	unreliable	0.731687	0.816768
CHEMBL310	IC50	Glutamate [NMDA] receptor subunit epsilon 1	COC(=O)[C@H]1CCC(=O)N1CC(O)C1=C(O)C2=C(C=C1OC)C(=O)C1=C(C=C(O)C(C)=C1)C2=O	4.70986	0.251046	0.748954	unreliable	0.606013	0.80119
CHEMBL4508	Ki	Glutaminyl-peptide cyclotransferase	COC(=O)[C@H]1CCC(=O)N1CC(O)C1=C(O)C2=C(C=C1OC)C(=O)C1=C(C=C(O)C(C)=C1)C2=O	6.26026	0.254141	0.745859	unreliable	0.628634	0.816139
CHEMBL614575	IC50	HCT-116/VM46	COC(=O)[C@H]1CCC(=O)N1CC(O)C1=C(O)C2=C(C=C1OC)C(=O)C1=C(C=C(O)C(C)=C1)C2=O	6.22425	0.254237	0.745763	unreliable	0.712882	0.83188
CHEMBL615052	IC50	Mycobacterium bovis BCG	COC(=O)[C@H]1CCC(=O)N1CC(O)C1=C(O)C2=C(C=C1OC)C(=O)C1=C(C=C(O)C(C)=C1)C2=O	4.74567	0.255482	0.744518	unreliable	0.559107	0.810782
CHEMBL4106131	IC50	HSP60/HSP10	COC(=O)[C@H]1CCC(=O)N1CC(O)C1=C(O)C2=C(C=C1OC)C(=O)C1=C(C=C(O)C(C)=C1)C2=O	4.81462	0.256911	0.743089	unreliable	0.613011	0.762168
CHEMBL354	EC50	Escherichia coli	COC(=O)[C@H]1CCC(=O)N1CC(O)C1=C(O)C2=C(C=C1OC)C(=O)C1=C(C=C(O)C(C)=C1)C2=O	4.90969	0.257104	0.742896	unreliable	0.553343	0.781515
CHEMBL612399	IC50	Botryotinia fuckeliana	COC(=O)[C@H]1CCC(=O)N1CC(O)C1=C(O)C2=C(C=C1OC)C(=O)C1=C(C=C(O)C(C)=C1)C2=O	3.57385	0.257853	0.742147	unreliable	0.521351	0.816667
CHEMBL613271	IC50	Raoultella planticola	COC(=O)[C@H]1CCC(=O)N1CC(O)C1=C(O)C2=C(C=C1OC)C(=O)C1=C(C=C(O)C(C)=C1)C2=O	4.63399	0.25832	0.74168	unreliable	0.782868	0.91
CHEMBL2335	Ki	Lysosomal Pro-X carboxypeptidase	COC(=O)[C@H]1CCC(=O)N1CC(O)C1=C(O)C2=C(C=C1OC)C(=O)C1=C(C=C(O)C(C)=C1)C2=O	3.72305	0.25876	0.74124	unreliable	0.772733	0.95
CHEMBL391	CD50	Vero	COC(=O)[C@H]1CCC(=O)N1CC(O)C1=C(O)C2=C(C=C1OC)C(=O)C1=C(C=C(O)C(C)=C1)C2=O	4.01176	0.26087	0.73913	unreliable	0.661237	0.81
CHEMBL613979	CC50	HUVEC	COC(=O)[C@H]1CCC(=O)N1CC(O)C1=C(O)C2=C(C=C1OC)C(=O)C1=C(C=C(O)C(C)=C1)C2=O	4.10567	0.26226	0.73774	unreliable	0.649858	0.881667
CHEMBL4081	Ki	Coagulation factor III	COC(=O)[C@H]1CCC(=O)N1CC(O)C1=C(O)C2=C(C=C1OC)C(=O)C1=C(C=C(O)C(C)=C1)C2=O	7.08918	0.262791	0.737209	unreliable	0.716739	0.971429
CHEMBL4295629	IC50	Nonstructural protein 5	COC(=O)[C@H]1CCC(=O)N1CC(O)C1=C(O)C2=C(C=C1OC)C(=O)C1=C(C=C(O)C(C)=C1)C2=O	4.8749	0.263598	0.736402	unreliable	0.611717	0.783333
CHEMBL612818	GI50	2008	COC(=O)[C@H]1CCC(=O)N1CC(O)C1=C(O)C2=C(C=C1OC)C(=O)C1=C(C=C(O)C(C)=C1)C2=O	5.24801	0.267444	0.732556	unreliable	0.583648	0.8225
CHEMBL2060	IC50	Lipoprotein lipase	COC(=O)[C@H]1CCC(=O)N1CC(O)C1=C(O)C2=C(C=C1OC)C(=O)C1=C(C=C(O)C(C)=C1)C2=O	4.74035	0.26853	0.73147	unreliable	0.58929	0.743333
CHEMBL2281	Ki	Dopamine D5 receptor	COC(=O)[C@H]1CCC(=O)N1CC(O)C1=C(O)C2=C(C=C1OC)C(=O)C1=C(C=C(O)C(C)=C1)C2=O	5.72001	0.270758	0.729242	unreliable	0.8	0.8
CHEMBL386	CC50	L1210	COC(=O)[C@H]1CCC(=O)N1CC(O)C1=C(O)C2=C(C=C1OC)C(=O)C1=C(C=C(O)C(C)=C1)C2=O	4.37882	0.271523	0.728477	unreliable	0.703234	0.801667
CHEMBL614657	IC50	C6	COC(=O)[C@H]1CCC(=O)N1CC(O)C1=C(O)C2=C(C=C1OC)C(=O)C1=C(C=C(O)C(C)=C1)C2=O	4.82172	0.274074	0.725926	unreliable	0.680205	0.811526
CHEMBL395	ED50	HepG2	COC(=O)[C@H]1CCC(=O)N1CC(O)C1=C(O)C2=C(C=C1OC)C(=O)C1=C(C=C(O)C(C)=C1)C2=O	4.92467	0.274725	0.725275	unreliable	0.662443	0.797183
CHEMBL614637	IC50	KETR3	COC(=O)[C@H]1CCC(=O)N1CC(O)C1=C(O)C2=C(C=C1OC)C(=O)C1=C(C=C(O)C(C)=C1)C2=O	5.56445	0.275862	0.724138	unreliable	0.791425	0.96
CHEMBL2637	Kd	c-Jun N-terminal kinase 3	COC(=O)[C@H]1CCC(=O)N1CC(O)C1=C(O)C2=C(C=C1OC)C(=O)C1=C(C=C(O)C(C)=C1)C2=O	5.90464	0.277647	0.722353	unreliable	0.523128	0.693291
CHEMBL613988	GI50	Kasumi 1	COC(=O)[C@H]1CCC(=O)N1CC(O)C1=C(O)C2=C(C=C1OC)C(=O)C1=C(C=C(O)C(C)=C1)C2=O	6.91195	0.280612	0.719388	unreliable	0.805864	0.87
CHEMBL612914	LC50	Leishmania pifanoi	COC(=O)[C@H]1CCC(=O)N1CC(O)C1=C(O)C2=C(C=C1OC)C(=O)C1=C(C=C(O)C(C)=C1)C2=O	5.15713	0.283367	0.716633	unreliable	0.651109	0.858333
CHEMBL3989381	IC50	Hepcidin	COC(=O)[C@H]1CCC(=O)N1CC(O)C1=C(O)C2=C(C=C1OC)C(=O)C1=C(C=C(O)C(C)=C1)C2=O	4.19897	0.283922	0.716078	unreliable	1	1
CHEMBL4295695	IC50	Metallo-beta-lactamase type 2	COC(=O)[C@H]1CCC(=O)N1CC(O)C1=C(O)C2=C(C=C1OC)C(=O)C1=C(C=C(O)C(C)=C1)C2=O	5.57889	0.284	0.716	unreliable	0.633817	0.765952
CHEMBL614628	EC50	Raji	COC(=O)[C@H]1CCC(=O)N1CC(O)C1=C(O)C2=C(C=C1OC)C(=O)C1=C(C=C(O)C(C)=C1)C2=O	4.90606	0.285714	0.714286	unreliable	0.565804	0.801883
CHEMBL612811	IC50	WISH	COC(=O)[C@H]1CCC(=O)N1CC(O)C1=C(O)C2=C(C=C1OC)C(=O)C1=C(C=C(O)C(C)=C1)C2=O	4.33799	0.286567	0.713433	unreliable	0.546637	0.775
CHEMBL2288	Ki	Peptidyl-prolyl cis-trans isomerase NIMA-interacting 1	COC(=O)[C@H]1CCC(=O)N1CC(O)C1=C(O)C2=C(C=C1OC)C(=O)C1=C(C=C(O)C(C)=C1)C2=O	5.67531	0.2875	0.7125	unreliable	0.726193	0.879881
CHEMBL349	EC50	Enterobacter cloacae	COC(=O)[C@H]1CCC(=O)N1CC(O)C1=C(O)C2=C(C=C1OC)C(=O)C1=C(C=C(O)C(C)=C1)C2=O	4.39898	0.287879	0.712121	unreliable	0.6	0.633333
CHEMBL3541	IC50	Histone deacetylase HD1B	COC(=O)[C@H]1CCC(=O)N1CC(O)C1=C(O)C2=C(C=C1OC)C(=O)C1=C(C=C(O)C(C)=C1)C2=O	6.18666	0.292473	0.707527	unreliable	0.621343	0.858571
CHEMBL4615	IC50	NH(3)-dependent NAD(+) synthetase	COC(=O)[C@H]1CCC(=O)N1CC(O)C1=C(O)C2=C(C=C1OC)C(=O)C1=C(C=C(O)C(C)=C1)C2=O	4.52344	0.292749	0.707251	unreliable	0.599631	0.83381
CHEMBL3414409	IC50	Macrophage-expressed gene 1 protein	COC(=O)[C@H]1CCC(=O)N1CC(O)C1=C(O)C2=C(C=C1OC)C(=O)C1=C(C=C(O)C(C)=C1)C2=O	5.62917	0.294458	0.705542	unreliable	0.8	0.9
CHEMBL3856	Ki	Brain glycogen phosphorylase	COC(=O)[C@H]1CCC(=O)N1CC(O)C1=C(O)C2=C(C=C1OC)C(=O)C1=C(C=C(O)C(C)=C1)C2=O	2.44293	0.295527	0.704473	unreliable	0.760768	0.874783
CHEMBL4296508	IC50	VCaP	COC(=O)[C@H]1CCC(=O)N1CC(O)C1=C(O)C2=C(C=C1OC)C(=O)C1=C(C=C(O)C(C)=C1)C2=O	4.72934	0.295669	0.704331	unreliable	0.6221	0.806371
CHEMBL2870	IC50	Methionyl-tRNA synthetase	COC(=O)[C@H]1CCC(=O)N1CC(O)C1=C(O)C2=C(C=C1OC)C(=O)C1=C(C=C(O)C(C)=C1)C2=O	5.07058	0.296154	0.703846	unreliable	0.79056	0.875198
CHEMBL3832644	IC50	ORAI1/STIM1	COC(=O)[C@H]1CCC(=O)N1CC(O)C1=C(O)C2=C(C=C1OC)C(=O)C1=C(C=C(O)C(C)=C1)C2=O	6.16374	0.29912	0.70088	unreliable	0.845467	0.957143
CHEMBL4917	IC50	Complement C3	COC(=O)[C@H]1CCC(=O)N1CC(O)C1=C(O)C2=C(C=C1OC)C(=O)C1=C(C=C(O)C(C)=C1)C2=O	5.62976	0.299754	0.700246	unreliable	0.535839	0.85
		Filter of Pro active greater than or equall = 0.7
		Filter of MCC greater than or equall = 0.6

## Sheet: N3
Target Name	ChEMBL-ID	UniProt ID	PDB Visualization	TTD ID	Probability	Model accuracy
DNA-(apurinic or apyrimidinic site) lyase	CHEMBL5619	P27695	6BOW	T13348	0.993	0.9111
Nuclear factor NF-kappa-B p105 subunit	CHEMBL3251	P19838	1SVC	Not Available	0.9841	0.9609
Cathepsin D	CHEMBL2581	P07339	4OD9	T67102	0.982	0.9895
Hypoxia-inducible factor 1 alpha	CHEMBL4261	Q16665	4H6J	Not Available	0.9802	0.8514
Proteasome component C5	CHEMBL4208	P20618	6KWY	Not Available	0.9589	0.9
Thyroid hormone receptor alpha	CHEMBL1860	P10827	3ILZ	T79591	0.9478	0.9915
Transcription intermediary factor 1-alpha	CHEMBL3108638	O15164	4YBM	Not Available	0.944	0.9556
Tyrosyl-DNA phosphodiesterase 1	CHEMBL1075138	Q9NUW8	6N0D	Not Available	0.9432	0.7122
Platelet-derived growth factor receptor alpha	CHEMBL2007	P16234	7LBF	T53524	0.9171	0.9107
Endoplasmic reticulum-associated amyloid beta-peptide-binding protein	CHEMBL4159	Q99714	2O23	Not Available	0.8947	0.7016
Cytochrome P450 3A4	CHEMBL340	P08684	5VCC	T37848	0.8888	0.9119
Glycine transporter 2	CHEMBL3060	Q9Y345	Not Available	Not Available	0.8865	0.9917
DNA topoisomerase II alpha	CHEMBL1806	P11388	6ZY5	T17048	0.8827	0.89
LSD1/CoREST complex	CHEMBL3137262	O60341	5L3D	Not Available	0.8795	0.9709
Voltage-gated N-type calcium channel alpha-1B subunit	CHEMBL4478	Q00975	Not Available	T38338	0.8625	0.9714
Kruppel-like factor 5	CHEMBL1293249	Q13887	Not Available	Not Available	0.8537	0.8633
Casein kinase II alpha/beta	CHEMBL3038477	P67870	6TLS	T51565	0.848	0.9923
Dual specificity protein kinase CLK4	CHEMBL4203	Q9HAZ1	6FYV	Not Available	0.8454	0.9445
Glucose transporter	CHEMBL2535	P11166	6THA	Not Available	0.8403	0.9875
Dipeptidyl peptidase IX	CHEMBL4793	Q86TI2	6EOR	Not Available	0.8311	0.9695
NT-3 growth factor receptor	CHEMBL5608	Q16288	6KZD	Not Available	0.8274	0.9589
Nuclear receptor ROR-beta	CHEMBL3091268	Q92753	Not Available	Not Available	0.8247	0.955
Dual specificity mitogen-activated protein kinase kinase 2	CHEMBL2964	P36507	1S9I	Not Available	0.8113	0.8
Dual specificity protein phosphatase 3	CHEMBL2635	P51452	3F81	Not Available	0.7926	0.94
Glutamate NMDA receptor; GRIN1/GRIN2B	CHEMBL1907603	Q05586	5EWM	Not Available	0.7884	0.9589
Glutamate receptor ionotropic, AMPA 2	CHEMBL4016	P42262	2WJW	T42392	0.787	0.8692
C5a anaphylatoxin chemotactic receptor	CHEMBL2373	P21730	6C1R	T15439	0.7855	0.9262
Indoleamine 2,3-dioxygenase	CHEMBL4685	P14902	6E43	T89697	0.7838	0.9638
Heat shock protein HSP 90-beta	CHEMBL4303	P08238	5FWK	Not Available	0.782	0.9677
Heat shock protein HSP 90-alpha	CHEMBL3880	P07900	3Q6M	Not Available	0.7697	0.9621
Nuclear factor erythroid 2-related factor 2	CHEMBL1075094	Q16236	2FLU	Not Available	0.7365	0.96
Tyrosine-protein kinase ITK/TSK	CHEMBL2959	Q08881	4HCU	T91761	0.7347	0.95
Adenosine A1 receptor	CHEMBL226	P30542	5N2S	T92072	0.7301	0.9593
G-protein coupled receptor 55	CHEMBL1075322	Q9Y2T6	Not Available	T87670	0.7247	0.7815
Arachidonate 12-lipoxygenase	CHEMBL3687	P18054	3D3L	Not Available	0.7149	0.7557
Sodium/hydrogen exchanger 1	CHEMBL2781	P19634	7DSX	T82028	0.71	0.9024
Signal transducer and activator of transcription 3	CHEMBL4026	P40763	6QHD	T29130	0.7014	0.8269
Kelch-like ECH-associated protein 1	CHEMBL2069156	Q14145	6WCQ	Not Available	0.6901	0.8238
Methionine aminopeptidase 2	CHEMBL3922	P50579	1B6A	T75596	0.686	0.9728
Toll-like receptor 4	CHEMBL5255	O00206	4G8A	T81443	0.6829	0.925
ADAM10	CHEMBL5028	O14672	6BE6	T31902	0.6826	0.975
Aminopeptidase N	CHEMBL1907	P15144	4FYT	T67272	0.6819	0.9331
Pregnane X receptor	CHEMBL3401	O75469	6TFI	T82702	0.6771	0.9473
Tissue factor pathway inhibitor	CHEMBL3713062	P10646	5NMV	T78890	0.6742	0.9733
Nitric oxide synthase, inducible	CHEMBL4481	P35228	3E7G	T02703	0.6691	0.948
Beta-glucocerebrosidase	CHEMBL2179	P04062	6TN1	T84173	0.665	0.8531
C-C chemokine receptor type 1	CHEMBL2413	P32246	Not Available	T16016	0.6612	0.895
L-lactate dehydrogenase B chain	CHEMBL4940	P07195	1I0Z	Not Available	0.6598	0.9553
Cystic fibrosis transmembrane conductance regulator	CHEMBL4051	P13569	6MSM	T55654	0.6544	0.9571
Cyclooxygenase-1	CHEMBL221	P23219	6Y3C	Not Available	0.6534	0.9017
Cyclin-dependent kinase 5	CHEMBL4036	Q00535	4AU8	T20973	0.6526	0.7909
Dual specificity phosphatase Cdc25C	CHEMBL2378	P30307	3OP3	Not Available	0.6506	0.9667
Kinesin-like protein 1	CHEMBL4581	P52732	6TIW	T28484	0.6471	0.9318
Phosphodiesterase 3A	CHEMBL241	Q14432	7LRC	T88975	0.6431	0.9294
Lysosomal Pro-X carboxypeptidase	CHEMBL2335	P42785	3N2Z	Not Available	0.6282	1
Protein kinase C alpha	CHEMBL299	P17252	4RA4	T12808	0.6171	0.9803
Cyclin-dependent kinase 1/cyclin B	CHEMBL2094127	P06493	6GU2	T49898	0.608	0.96
Tyrosine-protein kinase receptor TYRO3	CHEMBL5314	Q06418	1RHF	Not Available	0.6054	0.96
Thrombin	CHEMBL204	P00734	5EDM	T94033	0.5951	0.9601
Dihydroorotate dehydrogenase	CHEMBL1966	Q02127	6FMD	T99009	0.5944	0.9609
Tissue-type plasminogen activator	CHEMBL1873	P00750	1RTF	T45299	0.5942	0.9333
Ribosomal protein S6 kinase alpha 1	CHEMBL2553	Q15418	2Z7Q	Not Available	0.5934	0.8511
GABA-A receptor; alpha-1/beta-2/gamma-2	CHEMBL2095172	P14867	6X3T	T51487	0.5913	0.9267
Muscarinic acetylcholine receptor M2	CHEMBL211	P08172	5ZKC	T46185	0.5903	0.9497
Mineralocorticoid receptor	CHEMBL1994	P08235	4PF3	Not Available	0.5871	1
Muscarinic acetylcholine receptor M5	CHEMBL2035	P08912	6OL9	T79961	0.5833	0.9462
Protein-tyrosine phosphatase 2C	CHEMBL3864	Q06124	5EHR	T13057	0.5827	0.9442
Lipoxin A4 receptor	CHEMBL4227	P25090	6OMM	Not Available	0.5801	1
Muscarinic acetylcholine receptor M4	CHEMBL1821	P08173	5DSG	T20709	0.5788	0.9408
Serine/threonine-protein kinase MST2	CHEMBL4708	Q13188	6AO5	Not Available	0.5776	0.7167
Vasopressin V1b receptor	CHEMBL1921	P47901	Not Available	Not Available	0.5775	0.925
Prostanoid EP1 receptor	CHEMBL1811	P34995	Not Available	T15497	0.5768	0.9571
Acyl-CoA desaturase	CHEMBL5555	O00767	4ZYO	T10897	0.5726	0.975
Cyclin-dependent kinase 5/CDK5 activator 1	CHEMBL1907600	Q00535	1UNL	T20973	0.5712	0.9303
Arachidonate 5-lipoxygenase	CHEMBL215	P09917	3V98	Not Available	0.5684	0.9268
Excitatory amino acid transporter 1	CHEMBL3085	P43003	5LM4	Not Available	0.5682	0.9467
G protein-coupled receptor kinase 5	CHEMBL5678	P34947	4TND	Not Available	0.5619	0.88
Solute carrier family 40 member 1	CHEMBL3392948	Q9NP59	6WBV	T86264	0.5475	0.95
Proteasome Macropain subunit	CHEMBL3492	P49721	5LE5	Not Available	0.5474	0.9024
Glycine receptor subunit alpha-1	CHEMBL5845	P23415	4X5T	T50269	0.5471	0.9071
MAP/microtubule affinity-regulating kinase 4	CHEMBL5754	Q96L34	5ES1	Not Available	0.5435	0.795
Coagulation factor XI	CHEMBL2820	P03951	6I58	T46040	0.5416	0.9529
Muscarinic acetylcholine receptor M1	CHEMBL216	P11229	6OIJ	T28893	0.539	0.9423
Ribosomal protein S6 kinase alpha 6	CHEMBL4924	Q9UK32	6G77	Not Available	0.5385	0.8
Pyroglutamylated RFamide peptide receptor	CHEMBL5852	Q96P65	Not Available	Not Available	0.5375	0.85
Galectin-3	CHEMBL4531	P17931	6FOF	T72038	0.5353	0.969
Hexokinase type IV	CHEMBL3820	P35557	3F9M	T87166	0.5344	0.9196
Protein kinase C delta	CHEMBL2996	Q05655	1YRK	T44861	0.5322	0.9779
Inhibitor of nuclear factor kappa B kinase alpha subunit	CHEMBL3476	O15111	5EBZ	Not Available	0.5301	0.9583
PI3-kinase p110-alpha/p85-alpha	CHEMBL2111367	P27986	4JPS	T80276	0.5242	0.9433
Aurora kinase B/Inner centromere protein	CHEMBL3430907	Q96GD4	6YIH	T46781	0.5176	0.975
Histone deacetylase 2	CHEMBL1937	Q92769	7KBG	T51191	0.5163	0.9475
Fatty acid binding protein adipocyte	CHEMBL2083	P15090	3P6D	Not Available	0.5132	0.9571
Formyl peptide receptor 1	CHEMBL3359	P21462	Not Available	T87831	0.5119	0.9356
Coagulation factor XIII	CHEMBL4530	P00488	4KTY	Not Available	0.5107	0.96
Glutaminase kidney isoform, mitochondrial	CHEMBL2146302	O94925	3UO9	T86734	0.5098	1
Dual specificity phosphatase Cdc25B	CHEMBL4804	P30305	1QB0	Not Available	0.5066	0.795
Filter of PProbabilty greater than or equall = 70%
Filter of Probablity greater than or equall = 70%

## Sheet: N4
Sl. No.	Target Name in File	Gene Symbol / ID	Type
1	Purinergic receptor P2Y12	P2RY12	Gene			1-13= 3DSTarPred
2	Monoamine oxidase A	MAOA	Gene			14-50 = SuperPred
3	DNA topoisomerase II alpha	TOP2A	Gene			51-117= AmiActive
4	Sphingomyelin phosphodiesterase	SMPD1	Gene (Acid Sphingomyelinase)
5	Poly(ADP-ribose) glycohydrolase	PARG	Gene
6	Adenosine A2a receptor	ADORA2A	Gene
7	7,8-dihydro-8-oxoguanine triphosphatase	NUDT1(or MTH1)	Gene
8	Serine/threonine-protein kinase TBK1	TBK1	Gene
9	Inhibitor of nuclear factor kappa B kinase epsilon subunit	IKBKE	Gene
10	Protein-tyrosine phosphatase 1B	PTPN1	Gene
11	Beta-1 adrenergic receptor	ADRB1	Gene
12	Adrenergic receptor alpha-1	ADRA1A/ADRA1B	Gene (Generic Alpha-1)
13	Anandamide amidohydrolase	FAAH	Gene
14	DNA-(apurinic or apyrimidinic site) lyase	APEX1	Gene
15	Nuclear factor NF-kappa-B p105 subunit	NFKB1	Gene
16	Cathepsin D	CTSD	Gene
17	Hypoxia-inducible factor 1 alpha	HIF1A	Gene
18	Proteasome component C5	PSMB1	Gene
19	Thyroid hormone receptor alpha	THRA	Gene
20	Transcription intermediary factor 1-alpha	TRIM24	Gene
21	Tyrosyl-DNA phosphodiesterase 1	TDP1	Gene
22	Platelet-derived growth factor receptor alpha	PDGFRA	Gene
23	Endoplasmic reticulum-associated amyloid beta-peptide-binding protein	HSD17B10	Gene (ABAD/ERAB)
24	Cytochrome P450 3A4	CYP3A4	Gene
25	Glycine transporter 2	SLC6A5	Gene
26	DNA topoisomerase II alpha	TOP2A	Gene
27	LSD1/CoREST complex	KDM1A/RCOR1	Complex (Genes)
28	Voltage-gated N-type calcium channel alpha-1B subunit	CACNA1B	Gene
29	Kruppel-like factor 5	KLF5	Gene
30	Casein kinase II alpha/beta	CSNK2A1/CSNK2B	Gene
31	Dual specificity protein kinase CLK4	CLK4	Gene
32	Glucose transporter	SLC2A1(GLUT1)	Gene (Likely generic)
33	Dipeptidyl peptidase IX	DPP9	Gene
34	NT-3 growth factor receptor	NTRK3	Gene
35	Nuclear receptor ROR-beta	RORB	Gene
36	Dual specificity mitogen-activated protein kinase kinase 2	MAP2K2	Gene
37	Dual specificity protein phosphatase 3	DUSP3	Gene
38	Glutamate NMDA receptor; GRIN1/GRIN2B	GRIN1/GRIN2B	Gene
39	Glutamate receptor ionotropic, AMPA 2	GRIA2	Gene
40	C5a anaphylatoxin chemotactic receptor	C5AR1	Gene
41	Indoleamine 2,3-dioxygenase	IDO1	Gene
42	Heat shock protein HSP 90-beta	HSP90AB1	Gene
43	Heat shock protein HSP 90-alpha	HSP90AA1	Gene
44	Nuclear factor erythroid 2-related factor 2	NFE2L2	Gene
45	Tyrosine-protein kinase ITK/TSK	ITK	Gene
46	Adenosine A1 receptor	ADORA1	Gene
47	G-protein coupled receptor 55	GPR55	Gene
48	Arachidonate 12-lipoxygenase	ALOX12	Gene
49	Sodium/hydrogen exchanger 1	SLC9A1	Gene
50	Signal transducer and activator of transcription 3	STAT3	Gene
51	Bcl2-antagonist of cell death (BAD)	BAD	Gene
52	Mu opioid receptor	OPRM1	Gene
53	Phosphodiesterase 1A	PDE1A	Gene
54	E3 ubiquitin-protein ligase TRIM33	TRIM33	Gene
55	Histamine H2 receptor	HRH2	Gene
56	Hepatitis C virus	HCV	Virus
57	CEM-DNR	CEM-DNR	Cell Line (Leukemia)
58	Acetolactate synthase	ILVBL(Human) /ilvB(Bac.)	Gene (Species dependent)
59	Small conductance calcium-activated potassium channel protein 3	KCNN3	Gene
60	HCT-116	HCT-116	Cell Line (Colon)
61	Neuropeptide Y receptor type 5	NPY5R	Gene
62	Serine/threonine-protein kinase PLK1	PLK1	Gene
63	Catenin beta-1	CTNNB1	Gene
64	MCF7-DOX	MCF7-DOX	Cell Line (Breast)
65	Human coxsackievirus B1	CVB1	Virus
66	L5178Y	L5178Y	Cell Line (Lymphoma)
67	Rhodopsin kinase	GRK1	Gene
68	Canalicular multispecific organic anion transporter 1	ABCC2	Gene
69	P-selectin	SELP	Gene
70	Diacylglycerol O-acyltransferase 1	DGAT1	Gene
71	Alpha-2a adrenergic receptor	ADRA2A	Gene
72	SK-HEP1	SK-HEP1	Cell Line (Liver)
73	Phosphoglycerate kinase	PGK1	Gene
74	3-oxoacyl-[acyl-carrier-protein] synthase III	fabH	Gene (Bacterial)
75	Translocator protein	TSPO	Gene
76	Cytochrome P450 11B2	CYP11B2	Gene
77	MEF	MEF	Cell Line (Fibroblasts)
78	Galectin-1	LGALS1	Gene
79	Poly [ADP-ribose] polymerase 11	PARP11	Gene
80	Human immunodeficiency virus type 2 (ISOLATE ROD)	HIV-2	Virus
81	Peritoneal macrophage cells	Macrophage	Cell Type
82	Mycobacterium tuberculosis H37Rv	M. tuberculosis	Organism
83	Homo sapiens	Homo sapiens	Organism
84	Transcription intermediary factor 1-alpha	TRIM24	Gene
85	Dopamine D1 receptor	DRD1	Gene
86	Hexokinase type IV	GCK	Gene
87	Toxoplasma gondii RH	T. gondii	Organism
88	Corpus cavernosum	Tissue	Tissue
89	Marburgvirus	MARV	Virus
90	NCM460	NCM460	Cell Line (Colon)
91	Glutamate [NMDA] receptor subunit epsilon 1	GRIN2A	Gene
92	Glutaminyl-peptide cyclotransferase	QPCT	Gene
93	HCT-116/VM46	HCT-116/VM46	Cell Line
94	HSP60/HSP10	HSPD1/HSPE1	Gene
95	Raoultella planticola	R. planticola	Organism
96	Lysosomal Pro-X carboxypeptidase	PRCP	Gene
97	Vero	Vero	Cell Line (Kidney)
98	HUVEC	HUVEC	Cell Line (Endothelial)
99	Coagulation factor III	F3	Gene
100	Nonstructural protein 5	NS5	Viral Protein
101	Dopamine D5 receptor	DRD5	Gene
102	L1210	L1210	Cell Line (Leukemia)
103	C6	C6	Cell Line (Glioma)
104	HepG2	HepG2	Cell Line (Liver)
105	KETR3	KETR3	Cell Line (Renal)
106	Kasumi 1	Kasumi-1	Cell Line (Leukemia)
107	Leishmania pifanoi	L. pifanoi	Organism
108	Hepcidin	HAMP	Gene
109	Metallo-beta-lactamase type 2	blm	Gene (Bacterial)
110	Peptidyl-prolyl cis-trans isomerase NIMA-interacting 1	PIN1	Gene
111	Enterobacter cloacae	E. cloacae	Organism
112	Histone deacetylase HD1B	HDAC1	Gene (Likely variant)
113	Macrophage-expressed gene 1 protein	MPEG1	Gene
114	Brain glycogen phosphorylase	PYGB	Gene
115	VCaP	VCaP	Cell Line (Prostate)
116	Methionyl-tRNA synthetase	MARS1	Gene
117	ORAI1/STIM1	ORAI1/STIM1	Gene

## Sheet: N5
Gene Symbol	Description	Category	Uniprot ID	Gifts	GC Id	Relevance score	GeneCards Link
ABCC8	ATP Binding Cassette Subfamily C Member 8	Protein Coding	Q09428	58	GC11M017392	266.134	https://www.genecards.org/cgi-bin/carddisp.pl?gene=ABCC8
HNF1A	HNF1 Homeobox A	Protein Coding	P20823	59	GC12P120978	262.549	https://www.genecards.org/cgi-bin/carddisp.pl?gene=HNF1A
GCK	Glucokinase	Protein Coding	P35557	61	GC07M045967	261.006	https://www.genecards.org/cgi-bin/carddisp.pl?gene=GCK
INS	Insulin	Protein Coding	P01308	60	GC11M002159	251.109	https://www.genecards.org/cgi-bin/carddisp.pl?gene=INS
LMNA	Lamin A/C	Protein Coding	P02545	63	GC01P156082	235.403	https://www.genecards.org/cgi-bin/carddisp.pl?gene=LMNA
KCNJ11	Potassium Inwardly Rectifying Channel Subfamily J Member 11	Protein Coding	Q14654	58	GC11M018286	222.968	https://www.genecards.org/cgi-bin/carddisp.pl?gene=KCNJ11
WFS1	Wolframin ER Transmembrane Glycoprotein	Protein Coding	O76024	58	GC04P006269	206.866	https://www.genecards.org/cgi-bin/carddisp.pl?gene=WFS1
TTN	Titin	Protein Coding	Q8WZ42	60	GC02M178525	204.154	https://www.genecards.org/cgi-bin/carddisp.pl?gene=TTN
HNF4A	Hepatocyte Nuclear Factor 4 Alpha	Protein Coding	P41235	62	GC20P044355	201.851	https://www.genecards.org/cgi-bin/carddisp.pl?gene=HNF4A
APOB	Apolipoprotein B	Protein Coding	P04114	58	GC02M020956	201.657	https://www.genecards.org/cgi-bin/carddisp.pl?gene=APOB
NF1	Neurofibromin 1	Protein Coding	P21359	60	GC17P031094	200.754	https://www.genecards.org/cgi-bin/carddisp.pl?gene=NF1
HNF1B	HNF1 Homeobox B	Protein Coding	P35680	55	GC17M037686	194.727	https://www.genecards.org/cgi-bin/carddisp.pl?gene=HNF1B
CACNA1A	Calcium Voltage-Gated Channel Subunit Alpha1 A	Protein Coding	O00555	60	GC19M013206	187.823	https://www.genecards.org/cgi-bin/carddisp.pl?gene=CACNA1A
TSC2	TSC Complex Subunit 2	Protein Coding	P49815	64	GC16P135937	187.469	https://www.genecards.org/cgi-bin/carddisp.pl?gene=TSC2
RET	Ret Proto-Oncogene	Protein Coding	P07949	67	GC10P054397	183.265	https://www.genecards.org/cgi-bin/carddisp.pl?gene=RET
BRCA2	BRCA2 DNA Repair Associated	Protein Coding	P51587	60	GC13P032315	178.738	https://www.genecards.org/cgi-bin/carddisp.pl?gene=BRCA2
INSR	Insulin Receptor	Protein Coding	P06213	66	GC19M007112	169.113	https://www.genecards.org/cgi-bin/carddisp.pl?gene=INSR
IL6	Interleukin 6	Protein Coding	P05231	63	GC07P022725	156.638	https://www.genecards.org/cgi-bin/carddisp.pl?gene=IL6
PPARG	Peroxisome Proliferator Activated Receptor Gamma	Protein Coding	P37231	65	GC03P012287	155.444	https://www.genecards.org/cgi-bin/carddisp.pl?gene=PPARG
TERT	Telomerase Reverse Transcriptase	Protein Coding	O14746	64	GC05M001253	155.348	https://www.genecards.org/cgi-bin/carddisp.pl?gene=TERT
PDX1	Pancreatic And Duodenal Homeobox 1	Protein Coding	P52945	58	GC13P030267	153.94	https://www.genecards.org/cgi-bin/carddisp.pl?gene=PDX1
COL1A1	Collagen Type I Alpha 1 Chain	Protein Coding	P02452	62	GC17M105110	152.626	https://www.genecards.org/cgi-bin/carddisp.pl?gene=COL1A1
COL1A2	Collagen Type I Alpha 2 Chain	Protein Coding	P08123	60	GC07P094394	151.565	https://www.genecards.org/cgi-bin/carddisp.pl?gene=COL1A2
MFN2	Mitofusin 2	Protein Coding	O95140	60	GC01P011980	151.343	https://www.genecards.org/cgi-bin/carddisp.pl?gene=MFN2
MLH1	MutL Homolog 1	Protein Coding	P40692	61	GC03P036993	151.311	https://www.genecards.org/cgi-bin/carddisp.pl?gene=MLH1
ACE	Angiotensin I Converting Enzyme	Protein Coding	P12821	64	GC17P063477	147.377	https://www.genecards.org/cgi-bin/carddisp.pl?gene=ACE
POMT2	Protein O-Mannosyltransferase 2	Protein Coding	Q9UKY4	55	GC14M077274	147.194	https://www.genecards.org/cgi-bin/carddisp.pl?gene=POMT2
NEUROD1	Neuronal Differentiation 1	Protein Coding	Q13562	55	GC02M181673	146.817	https://www.genecards.org/cgi-bin/carddisp.pl?gene=NEUROD1
TCF7L2	Transcription Factor 7 Like 2	Protein Coding	Q9NQB0	60	GC10P112950	145.841	https://www.genecards.org/cgi-bin/carddisp.pl?gene=TCF7L2
SLC2A2	Solute Carrier Family 2 Member 2	Protein Coding	P11168	63	GC03M171024	144.813	https://www.genecards.org/cgi-bin/carddisp.pl?gene=SLC2A2
ENPP1	Ectonucleotide Pyrophosphatase/Phosphodiesterase 1	Protein Coding	P22413	63	GC06P200743	144.484	https://www.genecards.org/cgi-bin/carddisp.pl?gene=ENPP1
PLEC	Plectin	Protein Coding	Q15149	55	GC08M147766	142.463	https://www.genecards.org/cgi-bin/carddisp.pl?gene=PLEC
AKT2	AKT Serine/Threonine Kinase 2	Protein Coding	P31751	66	GC19M040230	141.786	https://www.genecards.org/cgi-bin/carddisp.pl?gene=AKT2
BSCL2	BSCL2 Lipid Droplet Biogenesis Associated, Seipin	Protein Coding	Q96G97	54	GC11M146068	139.364	https://www.genecards.org/cgi-bin/carddisp.pl?gene=BSCL2
LIPC	Lipase C, Hepatic Type	Protein Coding	P11150	58	GC15P058410	137.547	https://www.genecards.org/cgi-bin/carddisp.pl?gene=LIPC
APOE	Apolipoprotein E	Protein Coding	P02649	62	GC19P171829	136.919	https://www.genecards.org/cgi-bin/carddisp.pl?gene=APOE
TP53	Tumor Protein P53	Protein Coding	P04637	66	GC17M007661	133.232	https://www.genecards.org/cgi-bin/carddisp.pl?gene=TP53
VEGFA	Vascular Endothelial Growth Factor A	Protein Coding	P15692	61	GC06P043770	133.143	https://www.genecards.org/cgi-bin/carddisp.pl?gene=VEGFA
VWF	Von Willebrand Factor	Protein Coding	P04275	60	GC12M038730	132.366	https://www.genecards.org/cgi-bin/carddisp.pl?gene=VWF
PAX4	Paired Box 4	Protein Coding	O43316	51	GC07M127610	130.138	https://www.genecards.org/cgi-bin/carddisp.pl?gene=PAX4
PTGS2	Prostaglandin-Endoperoxide Synthase 2	Protein Coding	P35354	63	GC01M186671	129.13	https://www.genecards.org/cgi-bin/carddisp.pl?gene=PTGS2
SLC2A1	Solute Carrier Family 2 Member 1	Protein Coding	P11166	66	GC01M042925	128.327	https://www.genecards.org/cgi-bin/carddisp.pl?gene=SLC2A1
SDHA	Succinate Dehydrogenase Complex Flavoprotein Subunit A	Protein Coding	P31040	60	GC05P000254	128.233	https://www.genecards.org/cgi-bin/carddisp.pl?gene=SDHA
FGFR1	Fibroblast Growth Factor Receptor 1	Protein Coding	P11362	67	GC08M038400	127.506	https://www.genecards.org/cgi-bin/carddisp.pl?gene=FGFR1
IRS1	Insulin Receptor Substrate 1	Protein Coding	P35568	60	GC02M226731	127.328	https://www.genecards.org/cgi-bin/carddisp.pl?gene=IRS1
TGFBR2	Transforming Growth Factor Beta Receptor 2	Protein Coding	P37173	65	GC03P031087	126.888	https://www.genecards.org/cgi-bin/carddisp.pl?gene=TGFBR2
MEN1	Menin 1	Protein Coding	O00255	58	GC11M064803	126.514	https://www.genecards.org/cgi-bin/carddisp.pl?gene=MEN1
AARS1	Alanyl-TRNA Synthetase 1	Protein Coding	P49588	56	GC16M076634	126.353	https://www.genecards.org/cgi-bin/carddisp.pl?gene=AARS1
APOA1	Apolipoprotein A1	Protein Coding	P02647	62	GC11M116835	125.897	https://www.genecards.org/cgi-bin/carddisp.pl?gene=APOA1
IDS	Iduronate 2-Sulfatase	Protein Coding	P22304	60	GC0XM149476	125.472	https://www.genecards.org/cgi-bin/carddisp.pl?gene=IDS
TNF	Tumor Necrosis Factor	Protein Coding	P01375	63	GC06P199528	125.088	https://www.genecards.org/cgi-bin/carddisp.pl?gene=TNF
KIF1B	Kinesin Family Member 1B	Protein Coding	O60333	55	GC01P010210	124.759	https://www.genecards.org/cgi-bin/carddisp.pl?gene=KIF1B
IL2RA	Interleukin 2 Receptor Subunit Alpha	Protein Coding	P01589	63	GC10M006010	124.491	https://www.genecards.org/cgi-bin/carddisp.pl?gene=IL2RA
ERBB2	Erb-B2 Receptor Tyrosine Kinase 2	Protein Coding	P04626	68	GC17P039687	124.245	https://www.genecards.org/cgi-bin/carddisp.pl?gene=ERBB2
AQP2	Aquaporin 2	Protein Coding	P41181	60	GC12P049950	123.686	https://www.genecards.org/cgi-bin/carddisp.pl?gene=AQP2
FOXP3	Forkhead Box P3~Name Same As:- HGNC:13781	Protein Coding	Q9BZS1	60	GC0XM049250	120.781	https://www.genecards.org/cgi-bin/carddisp.pl?gene=FOXP3
COL3A1	Collagen Type III Alpha 1 Chain	Protein Coding	P02461	60	GC02P188974	120.02	https://www.genecards.org/cgi-bin/carddisp.pl?gene=COL3A1
SCN9A	Sodium Voltage-Gated Channel Alpha Subunit 9	Protein Coding	Q15858	60	GC02M166195	119.95	https://www.genecards.org/cgi-bin/carddisp.pl?gene=SCN9A
RYR2	Ryanodine Receptor 2	Protein Coding	Q92736	60	GC01P237042	118.193	https://www.genecards.org/cgi-bin/carddisp.pl?gene=RYR2
CEL	Carboxyl Ester Lipase	Protein Coding	P19835	57	GC09P133061	117.938	https://www.genecards.org/cgi-bin/carddisp.pl?gene=CEL
HFE	Homeostatic Iron Regulator	Protein Coding	Q30201	57	GC06P026087	117.902	https://www.genecards.org/cgi-bin/carddisp.pl?gene=HFE
AVPR2	Arginine Vasopressin Receptor 2	Protein Coding	P30518	60	GC0XP153902	117.758	https://www.genecards.org/cgi-bin/carddisp.pl?gene=AVPR2
NF2	NF2, Moesin-Ezrin-Radixin Like (MERLIN) Tumor Suppressor	Protein Coding	P35240	61	GC22P029603	117.756	https://www.genecards.org/cgi-bin/carddisp.pl?gene=NF2
LPL	Lipoprotein Lipase	Protein Coding	P06858	63	GC08P019901	117.56	https://www.genecards.org/cgi-bin/carddisp.pl?gene=LPL
NEB	Nebulin	Protein Coding	P20929	50	GC02M151485	117.351	https://www.genecards.org/cgi-bin/carddisp.pl?gene=NEB
LDLR	Low Density Lipoprotein Receptor	Protein Coding	P01130	64	GC19P170942	116.796	https://www.genecards.org/cgi-bin/carddisp.pl?gene=LDLR
DYSF	Dysferlin	Protein Coding	O75923	55	GC02P071453	115.997	https://www.genecards.org/cgi-bin/carddisp.pl?gene=DYSF
KLF11	KLF Transcription Factor 11	Protein Coding	O14901	48	GC02P011194	115.368	https://www.genecards.org/cgi-bin/carddisp.pl?gene=KLF11
TFR2	Transferrin Receptor 2	Protein Coding	Q9UP52	57	GC07M100620	115.118	https://www.genecards.org/cgi-bin/carddisp.pl?gene=TFR2
NPC1	NPC Intracellular Cholesterol Transporter 1	Protein Coding	O15118	61	GC18M023506	114.828	https://www.genecards.org/cgi-bin/carddisp.pl?gene=NPC1
SLC30A8	Solute Carrier Family 30 Member 8	Protein Coding	Q8IWU4	54	GC08P116950	114.503	https://www.genecards.org/cgi-bin/carddisp.pl?gene=SLC30A8
COL2A1	Collagen Type II Alpha 1 Chain	Protein Coding	P02458	62	GC12M047972	113.496	https://www.genecards.org/cgi-bin/carddisp.pl?gene=COL2A1
CTLA4	Cytotoxic T-Lymphocyte Associated Protein 4	Protein Coding	P16410	60	GC02P205372	113.208	https://www.genecards.org/cgi-bin/carddisp.pl?gene=CTLA4
AIRE	Autoimmune Regulator	Protein Coding	O43918	56	GC21P044285	111.066	https://www.genecards.org/cgi-bin/carddisp.pl?gene=AIRE
ADIPOQ	Adiponectin, C1Q And Collagen Domain Containing	Protein Coding	Q15848	59	GC03P186842	110.07	https://www.genecards.org/cgi-bin/carddisp.pl?gene=ADIPOQ
TGFB1	Transforming Growth Factor Beta 1	Protein Coding	P01137	65	GC19M041301	109.947	https://www.genecards.org/cgi-bin/carddisp.pl?gene=TGFB1
MYO7A	Myosin VIIA	Protein Coding	Q13402	55	GC11P077128	109.384	https://www.genecards.org/cgi-bin/carddisp.pl?gene=MYO7A
DMD	Dystrophin	Protein Coding	P11532	57	GC0XM031097	108.848	https://www.genecards.org/cgi-bin/carddisp.pl?gene=DMD
SLC2A4	Solute Carrier Family 2 Member 4	Protein Coding	P14672	60	GC17P174515	108.659	https://www.genecards.org/cgi-bin/carddisp.pl?gene=SLC2A4
FLNA	Filamin A	Protein Coding	P21333	62	GC0XM154348	108.142	https://www.genecards.org/cgi-bin/carddisp.pl?gene=FLNA
SMARCA4	SWI/SNF Related BAF Chromatin Remodeling Complex Subunit ATPase 4	Protein Coding	P51532	63	GC19P170938	107.661	https://www.genecards.org/cgi-bin/carddisp.pl?gene=SMARCA4
WNK1	WNK Lysine Deficient Protein Kinase 1	Protein Coding	Q9H4A3	61	GC12P000968	107.558	https://www.genecards.org/cgi-bin/carddisp.pl?gene=WNK1
NEFL	Neurofilament Light Chain	Protein Coding	P07196	57	GC08M024950	107.095	https://www.genecards.org/cgi-bin/carddisp.pl?gene=NEFL
EXT2	Exostosin Glycosyltransferase 2	Protein Coding	Q93063	57	GC11P044095	106.233	https://www.genecards.org/cgi-bin/carddisp.pl?gene=EXT2
MMP2	Matrix Metallopeptidase 2	Protein Coding	P08253	66	GC16P137330	105.965	https://www.genecards.org/cgi-bin/carddisp.pl?gene=MMP2
PCSK9	Proprotein Convertase Subtilisin/Kexin Type 9	Protein Coding	Q8NBP7	62	GC01P055039	105.851	https://www.genecards.org/cgi-bin/carddisp.pl?gene=PCSK9
KCNQ1	Potassium Voltage-Gated Channel Subfamily Q Member 1	Protein Coding	P51787	62	GC11P002444	105.548	https://www.genecards.org/cgi-bin/carddisp.pl?gene=KCNQ1
FGFR2	Fibroblast Growth Factor Receptor 2	Protein Coding	P21802	67	GC10M121478	105.493	https://www.genecards.org/cgi-bin/carddisp.pl?gene=FGFR2
KCNH2	Potassium Voltage-Gated Channel Subfamily H Member 2	Protein Coding	Q12809	63	GC07M150944	105.344	https://www.genecards.org/cgi-bin/carddisp.pl?gene=KCNH2
ACVRL1	Activin A Receptor Like Type 1	Protein Coding	P37023	63	GC12P051906	105.081	https://www.genecards.org/cgi-bin/carddisp.pl?gene=ACVRL1
EGFR	Epidermal Growth Factor Receptor	Protein Coding	P00533	67	GC07P055019	104.607	https://www.genecards.org/cgi-bin/carddisp.pl?gene=EGFR
GARS1	Glycyl-TRNA Synthetase 1	Protein Coding	P41250	57	GC07P030580	104.382	https://www.genecards.org/cgi-bin/carddisp.pl?gene=GARS1
PTEN	Phosphatase And Tensin Homolog	Protein Coding	P60484	65	GC10P134441	104.145	https://www.genecards.org/cgi-bin/carddisp.pl?gene=PTEN
STAT3	Signal Transducer And Activator Of Transcription 3	Protein Coding	P40763	66	GC17M042313	103.953	https://www.genecards.org/cgi-bin/carddisp.pl?gene=STAT3
CDKAL1	CDKAL1 Threonylcarbamoyladenosine TRNA Methylthiotransferase	Protein Coding	Q5VV42	50	GC06P020534	103.58	https://www.genecards.org/cgi-bin/carddisp.pl?gene=CDKAL1
CD36	CD36 Molecule (CD36 Blood Group)	Protein Coding	P16671	63	GC07P080369	103.437	https://www.genecards.org/cgi-bin/carddisp.pl?gene=CD36
SETX	Senataxin	Protein Coding	Q7Z333	52	GC09M132261	103.101	https://www.genecards.org/cgi-bin/carddisp.pl?gene=SETX
MTOR	Mechanistic Target Of Rapamycin Kinase	Protein Coding	P42345	68	GC01M011106	103.005	https://www.genecards.org/cgi-bin/carddisp.pl?gene=MTOR
PTPN22	Protein Tyrosine Phosphatase Non-Receptor Type 22	Protein Coding	Q9Y2R2	58	GC01M113813	102.737	https://www.genecards.org/cgi-bin/carddisp.pl?gene=PTPN22
INS-IGF2	INS-IGF2 Readthrough	Protein Coding	F8WCM5	38	GC11M016608	101.973	https://www.genecards.org/cgi-bin/carddisp.pl?gene=INS-IGF2
DYNC1H1	Dynein Cytoplasmic 1 Heavy Chain 1	Protein Coding	Q14204	57	GC14P122670	101.88	https://www.genecards.org/cgi-bin/carddisp.pl?gene=DYNC1H1
BMP2	Bone Morphogenetic Protein 2	Protein Coding	P12643	58	GC20P006767	101.835	https://www.genecards.org/cgi-bin/carddisp.pl?gene=BMP2
COL5A2	Collagen Type V Alpha 2 Chain	Protein Coding	P05997	57	GC02M189031	101.758	https://www.genecards.org/cgi-bin/carddisp.pl?gene=COL5A2
MMP9	Matrix Metallopeptidase 9	Protein Coding	P14780	66	GC20P046008	101.356	https://www.genecards.org/cgi-bin/carddisp.pl?gene=MMP9
BCL2	BCL2 Apoptosis Regulator	Protein Coding	P10415	64	GC18M063123	101.2	https://www.genecards.org/cgi-bin/carddisp.pl?gene=BCL2
ACE2	Angiotensin Converting Enzyme 2	Protein Coding	Q9BYF1	61	GC0XM015494	101	https://www.genecards.org/cgi-bin/carddisp.pl?gene=ACE2
IGF1	Insulin Like Growth Factor 1	Protein Coding	P05019	60	GC12M102395	100.956	https://www.genecards.org/cgi-bin/carddisp.pl?gene=IGF1
IGHMBP2	Immunoglobulin Mu DNA Binding Protein 2	Protein Coding	P38935	53	GC11P068903	100.95	https://www.genecards.org/cgi-bin/carddisp.pl?gene=IGHMBP2
NAGLU	N-Acetyl-Alpha-Glucosaminidase	Protein Coding	P54802	57	GC17P175632	100.893	https://www.genecards.org/cgi-bin/carddisp.pl?gene=NAGLU
USH2A	Usherin	Protein Coding	O75445	48	GC01M215622	100.546	https://www.genecards.org/cgi-bin/carddisp.pl?gene=USH2A
IRS2	Insulin Receptor Substrate 2	Protein Coding	Q9Y4H2	58	GC13M109752	100.252	https://www.genecards.org/cgi-bin/carddisp.pl?gene=IRS2
COL5A1	Collagen Type V Alpha 1 Chain	Protein Coding	P20908	59	GC09P134641	100	https://www.genecards.org/cgi-bin/carddisp.pl?gene=COL5A1
PTPN1	Protein Tyrosine Phosphatase Non-Receptor Type 1	Protein Coding	P18031	63	GC20P050510	99.4376	https://www.genecards.org/cgi-bin/carddisp.pl?gene=PTPN1
IGF2BP2	Insulin Like Growth Factor 2 MRNA Binding Protein 2	Protein Coding	Q9Y6M1	56	GC03M185643	98.9379	https://www.genecards.org/cgi-bin/carddisp.pl?gene=IGF2BP2
EP300	EP300 Lysine Acetyltransferase	Protein Coding	Q09472	65	GC22P041091	98.6266	https://www.genecards.org/cgi-bin/carddisp.pl?gene=EP300
VDR	Vitamin D Receptor	Protein Coding	P11473	61	GC12M047841	98.0947	https://www.genecards.org/cgi-bin/carddisp.pl?gene=VDR
PTPN11	Protein Tyrosine Phosphatase Non-Receptor Type 11	Protein Coding	Q06124	67	GC12P112418	97.9263	https://www.genecards.org/cgi-bin/carddisp.pl?gene=PTPN11
TRPV4	Transient Receptor Potential Cation Channel Subfamily V Member 4	Protein Coding	Q9HBA0	61	GC12M109783	97.7572	https://www.genecards.org/cgi-bin/carddisp.pl?gene=TRPV4
CIITA	Class II Major Histocompatibility Complex Transactivator	Protein Coding	P33076	56	GC16P136132	97.7424	https://www.genecards.org/cgi-bin/carddisp.pl?gene=CIITA
FBN1	Fibrillin 1	Protein Coding	P35555	60	GC15M048408	97.22	https://www.genecards.org/cgi-bin/carddisp.pl?gene=FBN1
POMGNT1	Protein O-Linked Mannose N-Acetylglucosaminyltransferase 1 (Beta 1,2-)	Protein Coding	Q8WZA1	57	GC01M046188	97.1662	https://www.genecards.org/cgi-bin/carddisp.pl?gene=POMGNT1
GAA	Alpha Glucosidase	Protein Coding	P10253	63	GC17P080101	97.0431	https://www.genecards.org/cgi-bin/carddisp.pl?gene=GAA
IL2	Interleukin 2	Protein Coding	P60568	58	GC04M122451	96.567	https://www.genecards.org/cgi-bin/carddisp.pl?gene=IL2
RETN	Resistin	Protein Coding	Q9HD89	55	GC19P007669	96.4885	https://www.genecards.org/cgi-bin/carddisp.pl?gene=RETN
EIF2AK3	Eukaryotic Translation Initiation Factor 2 Alpha Kinase 3	Protein Coding	Q9NZJ5	63	GC02M088556	96.0874	https://www.genecards.org/cgi-bin/carddisp.pl?gene=EIF2AK3
AVP	Arginine Vasopressin	Protein Coding	P01185	57	GC20M003082	96.0492	https://www.genecards.org/cgi-bin/carddisp.pl?gene=AVP
CDKN2A	Cyclin Dependent Kinase Inhibitor 2A	Protein Coding	Q8N726	63	GC09M021967	95.2913	https://www.genecards.org/cgi-bin/carddisp.pl?gene=CDKN2A
TRAPPC11	Trafficking Protein Particle Complex Subunit 11	Protein Coding	Q7Z392	48	GC04P183659	95.0034	https://www.genecards.org/cgi-bin/carddisp.pl?gene=TRAPPC11
SERPINE1	Serpin Family E Member 1	Protein Coding	P05121	63	GC07P115646	93.996	https://www.genecards.org/cgi-bin/carddisp.pl?gene=SERPINE1
FN1	Fibronectin 1	Protein Coding	P02751	63	GC02M215360	93.9796	https://www.genecards.org/cgi-bin/carddisp.pl?gene=FN1
DNMT1	DNA Methyltransferase 1	Protein Coding	P26358	66	GC19M010133	93.5598	https://www.genecards.org/cgi-bin/carddisp.pl?gene=DNMT1
GLIS3	GLIS Family Zinc Finger 3	Protein Coding	Q8NEA6	48	GC09M003816	93.1491	https://www.genecards.org/cgi-bin/carddisp.pl?gene=GLIS3
PRKAR1A	Protein Kinase CAMP-Dependent Type I Regulatory Subunit Alpha	Protein Coding	P10644	63	GC17P176252	92.968	https://www.genecards.org/cgi-bin/carddisp.pl?gene=PRKAR1A
CAPN3	Calpain 3	Protein Coding	P20807	60	GC15P042359	92.5079	https://www.genecards.org/cgi-bin/carddisp.pl?gene=CAPN3
AKT1	AKT Serine/Threonine Kinase 1	Protein Coding	P31749	66	GC14M104769	91.7835	https://www.genecards.org/cgi-bin/carddisp.pl?gene=AKT1
CETP	Cholesteryl Ester Transfer Protein	Protein Coding	P11597	60	GC16P056961	90.9754	https://www.genecards.org/cgi-bin/carddisp.pl?gene=CETP
VHL	Von Hippel-Lindau Tumor Suppressor	Protein Coding	P40337	60	GC03P030197	90.954	https://www.genecards.org/cgi-bin/carddisp.pl?gene=VHL
PLOD1	Procollagen-Lysine,2-Oxoglutarate 5-Dioxygenase 1	Protein Coding	Q02809	58	GC01P011934	90.8711	https://www.genecards.org/cgi-bin/carddisp.pl?gene=PLOD1
FGFR3	Fibroblast Growth Factor Receptor 3	Protein Coding	P22607	67	GC04P033759	90.6855	https://www.genecards.org/cgi-bin/carddisp.pl?gene=FGFR3
KIF1A	Kinesin Family Member 1A	Protein Coding	Q12756	55	GC02M240713	90.5311	https://www.genecards.org/cgi-bin/carddisp.pl?gene=KIF1A
MED25	Mediator Complex Subunit 25	Protein Coding	Q71SY5	51	GC19P172014	90.2826	https://www.genecards.org/cgi-bin/carddisp.pl?gene=MED25
DST	Dystonin	Protein Coding	Q03001	55	GC06M056457	90.1919	https://www.genecards.org/cgi-bin/carddisp.pl?gene=DST
LIPE	Lipase E, Hormone Sensitive Type	Protein Coding	Q05469	61	GC19M042401	90.1899	https://www.genecards.org/cgi-bin/carddisp.pl?gene=LIPE
ABCB11	ATP Binding Cassette Subfamily B Member 11	Protein Coding	O95342	58	GC02M168922	89.9248	https://www.genecards.org/cgi-bin/carddisp.pl?gene=ABCB11
CEP290	Centrosomal Protein 290	Protein Coding	O15078	53	GC12M088049	89.7429	https://www.genecards.org/cgi-bin/carddisp.pl?gene=CEP290
MPZ	Myelin Protein Zero	Protein Coding	P25189	55	GC01M170015	89.6658	https://www.genecards.org/cgi-bin/carddisp.pl?gene=MPZ
BLK	BLK Proto-Oncogene, Src Family Tyrosine Kinase	Protein Coding	P51451	61	GC08P011486	89.5078	https://www.genecards.org/cgi-bin/carddisp.pl?gene=BLK
UCP2	Uncoupling Protein 2	Protein Coding	P55851	58	GC11M073974	88.6501	https://www.genecards.org/cgi-bin/carddisp.pl?gene=UCP2
SGCB	Sarcoglycan Beta	Protein Coding	Q16585	51	GC04M052019	88.0858	https://www.genecards.org/cgi-bin/carddisp.pl?gene=SGCB
GLB1	Galactosidase Beta 1	Protein Coding	P16278	61	GC03M032963	88.0746	https://www.genecards.org/cgi-bin/carddisp.pl?gene=GLB1
APOA5	Apolipoprotein A5	Protein Coding	Q6Q788	55	GC11M116789	88.0664	https://www.genecards.org/cgi-bin/carddisp.pl?gene=APOA5
BRAF	B-Raf Proto-Oncogene, Serine/Threonine Kinase	Protein Coding	P15056	67	GC07M140803	87.9391	https://www.genecards.org/cgi-bin/carddisp.pl?gene=BRAF
POMT1	Protein O-Mannosyltransferase 1	Protein Coding	Q9Y6A1	57	GC09P131502	87.5832	https://www.genecards.org/cgi-bin/carddisp.pl?gene=POMT1
SMPD1	Sphingomyelin Phosphodiesterase 1	Protein Coding	P17405	61	GC11P006390	87.544	https://www.genecards.org/cgi-bin/carddisp.pl?gene=SMPD1
AGTR1	Angiotensin II Receptor Type 1	Protein Coding	P30556	64	GC03P148697	87.2405	https://www.genecards.org/cgi-bin/carddisp.pl?gene=AGTR1
CCL2	C-C Motif Chemokine Ligand 2	Protein Coding	P13500	60	GC17P034255	87.0281	https://www.genecards.org/cgi-bin/carddisp.pl?gene=CCL2
IL10	Interleukin 10	Protein Coding	P22301	59	GC01M206767	86.7154	https://www.genecards.org/cgi-bin/carddisp.pl?gene=IL10
IGF1R	Insulin Like Growth Factor 1 Receptor	Protein Coding	P08069	68	GC15P098648	86.6828	https://www.genecards.org/cgi-bin/carddisp.pl?gene=IGF1R
TSC1	TSC Complex Subunit 1	Protein Coding	Q92574	61	GC09M132891	86.6337	https://www.genecards.org/cgi-bin/carddisp.pl?gene=TSC1
NFE2L2	NFE2 Like BZIP Transcription Factor 2	Protein Coding	Q16236	64	GC02M177227	86.5367	https://www.genecards.org/cgi-bin/carddisp.pl?gene=NFE2L2
CACNA1H	Calcium Voltage-Gated Channel Subunit Alpha1 H	Protein Coding	O95180	61	GC16P001153	85.9685	https://www.genecards.org/cgi-bin/carddisp.pl?gene=CACNA1H
IFNG	Interferon Gamma	Protein Coding	P01579	63	GC12M068154	85.9551	https://www.genecards.org/cgi-bin/carddisp.pl?gene=IFNG
COL11A1	Collagen Type XI Alpha 1 Chain	Protein Coding	P12107	55	GC01M102876	85.4714	https://www.genecards.org/cgi-bin/carddisp.pl?gene=COL11A1
ALB	Albumin	Protein Coding	P02768	61	GC04P073397	85.4245	https://www.genecards.org/cgi-bin/carddisp.pl?gene=ALB
IL1RN	Interleukin 1 Receptor Antagonist	Protein Coding	P18510	62	GC02P160358	85.3959	https://www.genecards.org/cgi-bin/carddisp.pl?gene=IL1RN
GNAS	GNAS Complex Locus	Protein Coding	P84996	63	GC20P058839	85.1759	https://www.genecards.org/cgi-bin/carddisp.pl?gene=GNAS
PIK3CA	Phosphatidylinositol-4,5-Bisphosphate 3-Kinase Catalytic Subunit Alpha	Protein Coding	P42336	64	GC03P179148	85.1738	https://www.genecards.org/cgi-bin/carddisp.pl?gene=PIK3CA
IL1B	Interleukin 1 Beta	Protein Coding	P01584	59	GC02M112829	85.0596	https://www.genecards.org/cgi-bin/carddisp.pl?gene=IL1B
SLC26A2	Solute Carrier Family 26 Member 2	Protein Coding	P50443	55	GC05P162696	84.9609	https://www.genecards.org/cgi-bin/carddisp.pl?gene=SLC26A2
ATM	ATM Serine/Threonine Kinase	Protein Coding	Q13315	66	GC11P108222	84.8545	https://www.genecards.org/cgi-bin/carddisp.pl?gene=ATM
GBA1	Glucosylceramidase Beta 1	Protein Coding	P04062	62	GC01M169788	84.7153	https://www.genecards.org/cgi-bin/carddisp.pl?gene=GBA1
PKD2	Polycystin 2, Transient Receptor Potential Cation Channel	Protein Coding	Q13563	60	GC04P088007	84.5456	https://www.genecards.org/cgi-bin/carddisp.pl?gene=PKD2
APOC3	Apolipoprotein C3	Protein Coding	P02656	57	GC11P131648	84.5272	https://www.genecards.org/cgi-bin/carddisp.pl?gene=APOC3
STAT1	Signal Transducer And Activator Of Transcription 1	Protein Coding	P42224	65	GC02M190908	84.2847	https://www.genecards.org/cgi-bin/carddisp.pl?gene=STAT1
H19	H19 Imprinted Maternally Expressed Transcript	RNA Gene		36	GC11M001995	83.8944	https://www.genecards.org/cgi-bin/carddisp.pl?gene=H19
CYP11B2	Cytochrome P450 Family 11 Subfamily B Member 2	Protein Coding	P19099	57	GC08M142910	83.7455	https://www.genecards.org/cgi-bin/carddisp.pl?gene=CYP11B2
BRCA1	BRCA1 DNA Repair Associated	Protein Coding	P38398	63	GC17M043044	83.701	https://www.genecards.org/cgi-bin/carddisp.pl?gene=BRCA1
CPT2	Carnitine Palmitoyltransferase 2	Protein Coding	P23786	62	GC01P053196	83.6837	https://www.genecards.org/cgi-bin/carddisp.pl?gene=CPT2
HSPG2	Heparan Sulfate Proteoglycan 2	Protein Coding	P98160	60	GC01M021822	83.6294	https://www.genecards.org/cgi-bin/carddisp.pl?gene=HSPG2
SCN5A	Sodium Voltage-Gated Channel Alpha Subunit 5	Protein Coding	Q14524	63	GC03M038923	83.4389	https://www.genecards.org/cgi-bin/carddisp.pl?gene=SCN5A
CDH23	Cadherin Related 23	Protein Coding	Q9H251	55	GC10P071396	83.1085	https://www.genecards.org/cgi-bin/carddisp.pl?gene=CDH23
CTNNB1	Catenin Beta 1	Protein Coding	P35222	66	GC03P041194	82.9597	https://www.genecards.org/cgi-bin/carddisp.pl?gene=CTNNB1
SLC5A2	Solute Carrier Family 5 Member 2	Protein Coding	P31639	59	GC16P136877	82.3173	https://www.genecards.org/cgi-bin/carddisp.pl?gene=SLC5A2
SH3TC2	SH3 Domain And Tetratricopeptide Repeats 2	Protein Coding	Q8TF17	48	GC05M148923	82.2903	https://www.genecards.org/cgi-bin/carddisp.pl?gene=SH3TC2
FAS	Fas Cell Surface Death Receptor	Protein Coding	P25445	63	GC10P134457	82.0974	https://www.genecards.org/cgi-bin/carddisp.pl?gene=FAS
SYNE1	Spectrin Repeat Containing Nuclear Envelope Protein 1	Protein Coding	Q8NF91	52	GC06M152121	81.9857	https://www.genecards.org/cgi-bin/carddisp.pl?gene=SYNE1
TLR4	Toll Like Receptor 4	Protein Coding	O00206	63	GC09P117704	81.9831	https://www.genecards.org/cgi-bin/carddisp.pl?gene=TLR4
MTNR1B	Melatonin Receptor 1B	Protein Coding	P49286	57	GC11P092969	81.9544	https://www.genecards.org/cgi-bin/carddisp.pl?gene=MTNR1B
RYR1	Ryanodine Receptor 1	Protein Coding	P21817	61	GC19P171589	81.8444	https://www.genecards.org/cgi-bin/carddisp.pl?gene=RYR1
MAPK1	Mitogen-Activated Protein Kinase 1	Protein Coding	P28482	66	GC22M090309	81.7268	https://www.genecards.org/cgi-bin/carddisp.pl?gene=MAPK1
MSH2	MutS Homolog 2	Protein Coding	P43246	61	GC02P047403	81.7109	https://www.genecards.org/cgi-bin/carddisp.pl?gene=MSH2
MUTYH	MutY DNA Glycosylase	Protein Coding	Q9UIF7	57	GC01M045329	81.6847	https://www.genecards.org/cgi-bin/carddisp.pl?gene=MUTYH
ESR1	Estrogen Receptor 1	Protein Coding	P03372	67	GC06P201302	81.6506	https://www.genecards.org/cgi-bin/carddisp.pl?gene=ESR1
AGPAT2	1-Acylglycerol-3-Phosphate O-Acyltransferase 2	Protein Coding	O15120	55	GC09M136673	81.6143	https://www.genecards.org/cgi-bin/carddisp.pl?gene=AGPAT2
SCN1A	Sodium Voltage-Gated Channel Alpha Subunit 1	Protein Coding	P35498	60	GC02M165989	81.6037	https://www.genecards.org/cgi-bin/carddisp.pl?gene=SCN1A
JAK2	Janus Kinase 2	Protein Coding	O60674	66	GC09P004985	81.373	https://www.genecards.org/cgi-bin/carddisp.pl?gene=JAK2
NR3C2	Nuclear Receptor Subfamily 3 Group C Member 2	Protein Coding	P08235	58	GC04M148078	81.3389	https://www.genecards.org/cgi-bin/carddisp.pl?gene=NR3C2
PMM2	Phosphomannomutase 2	Protein Coding	O15305	58	GC16P008788	81.2748	https://www.genecards.org/cgi-bin/carddisp.pl?gene=PMM2
CDKN1B	Cyclin Dependent Kinase Inhibitor 1B	Protein Coding	P46527	61	GC12P085924	81.2283	https://www.genecards.org/cgi-bin/carddisp.pl?gene=CDKN1B
SOD1	Superoxide Dismutase 1	Protein Coding	P00441	66	GC21P031659	81.126	https://www.genecards.org/cgi-bin/carddisp.pl?gene=SOD1
BAX	BCL2 Associated X, Apoptosis Regulator	Protein Coding	Q07812	63	GC19P048954	81.0331	https://www.genecards.org/cgi-bin/carddisp.pl?gene=BAX
PKD1	Polycystin 1, Transient Receptor Potential Channel Interacting	Protein Coding	P98161	57	GC16M055149	80.9223	https://www.genecards.org/cgi-bin/carddisp.pl?gene=PKD1
HLA-DRB1	Major Histocompatibility Complex, Class II, DR Beta 1	Protein Coding	P01911	59	GC06M115004	80.8848	https://www.genecards.org/cgi-bin/carddisp.pl?gene=HLA-DRB1
HIF1A	Hypoxia Inducible Factor 1 Subunit Alpha	Protein Coding	Q16665	62	GC14P061695	80.7479	https://www.genecards.org/cgi-bin/carddisp.pl?gene=HIF1A
PNPLA2	Patatin Like Domain 2, Triacylglycerol Lipase	Protein Coding	Q96AD5	57	GC11P024751	80.6616	https://www.genecards.org/cgi-bin/carddisp.pl?gene=PNPLA2
COL4A3	Collagen Type IV Alpha 3 Chain	Protein Coding	Q01955	57	GC02P227164	80.6185	https://www.genecards.org/cgi-bin/carddisp.pl?gene=COL4A3
MITF	Melanocyte Inducing Transcription Factor	Protein Coding	O75030	60	GC03P070723	80.5829	https://www.genecards.org/cgi-bin/carddisp.pl?gene=MITF
HLA-DQB1	Major Histocompatibility Complex, Class II, DQ Beta 1	Protein Coding	P01920	57	GC06M115014	80.473	https://www.genecards.org/cgi-bin/carddisp.pl?gene=HLA-DQB1
SCN4A	Sodium Voltage-Gated Channel Alpha Subunit 4	Protein Coding	P35499	58	GC17M063938	80.3526	https://www.genecards.org/cgi-bin/carddisp.pl?gene=SCN4A
PPP1R3A	Protein Phosphatase 1 Regulatory Subunit 3A	Protein Coding	Q16821	55	GC07M113876	80.2025	https://www.genecards.org/cgi-bin/carddisp.pl?gene=PPP1R3A
COL4A4	Collagen Type IV Alpha 4 Chain	Protein Coding	P53420	56	GC02M226973	80.0699	https://www.genecards.org/cgi-bin/carddisp.pl?gene=COL4A4
NOS3	Nitric Oxide Synthase 3	Protein Coding	P29474	62	GC07P170688	79.9823	https://www.genecards.org/cgi-bin/carddisp.pl?gene=NOS3
PRF1	Perforin 1	Protein Coding	P14222	60	GC10M072689	79.7106	https://www.genecards.org/cgi-bin/carddisp.pl?gene=PRF1
TLR2	Toll Like Receptor 2	Protein Coding	O60603	64	GC04P153684	79.6558	https://www.genecards.org/cgi-bin/carddisp.pl?gene=TLR2
SQSTM1	Sequestosome 1	Protein Coding	Q13501	61	GC05P179806	79.3166	https://www.genecards.org/cgi-bin/carddisp.pl?gene=SQSTM1
DPP4	Dipeptidyl Peptidase 4	Protein Coding	P27487	63	GC02M161992	79.1824	https://www.genecards.org/cgi-bin/carddisp.pl?gene=DPP4
ADAMTS2	ADAM Metallopeptidase With Thrombospondin Type 1 Motif 2	Protein Coding	O95450	55	GC05M179110	79.094	https://www.genecards.org/cgi-bin/carddisp.pl?gene=ADAMTS2
G6PC1	Glucose-6-Phosphatase Catalytic Subunit 1	Protein Coding	P35575	55	GC17P177039	78.9448	https://www.genecards.org/cgi-bin/carddisp.pl?gene=G6PC1
CAPN10	Calpain 10	Protein Coding	Q9HC96	53	GC02P240586	78.544	https://www.genecards.org/cgi-bin/carddisp.pl?gene=CAPN10
IDH2	Isocitrate Dehydrogenase (NADP(+)) 2	Protein Coding	P48735	65	GC15M090083	78.5145	https://www.genecards.org/cgi-bin/carddisp.pl?gene=IDH2
NPHS2	NPHS2 Stomatin Family Member, Podocin	Protein Coding	Q9NP85	54	GC01M179554	78.3971	https://www.genecards.org/cgi-bin/carddisp.pl?gene=NPHS2
SLC19A2	Solute Carrier Family 19 Member 2	Protein Coding	O60779	57	GC01M169463	78.2822	https://www.genecards.org/cgi-bin/carddisp.pl?gene=SLC19A2
FBXO38	F-Box Protein 38	Protein Coding	Q6PIJ6	48	GC05P148383	78.2794	https://www.genecards.org/cgi-bin/carddisp.pl?gene=FBXO38
LEP	Leptin	Protein Coding	P41159	58	GC07P128241	78.2753	https://www.genecards.org/cgi-bin/carddisp.pl?gene=LEP
NKX2-2	NK2 Homeobox 2	Protein Coding	O95096	54	GC20M021511	78.2014	https://www.genecards.org/cgi-bin/carddisp.pl?gene=NKX2-2
TNNT2	Troponin T2, Cardiac Type	Protein Coding	P45379	60	GC01M201359	78.1044	https://www.genecards.org/cgi-bin/carddisp.pl?gene=TNNT2
BMPR1A	Bone Morphogenetic Protein Receptor Type 1A	Protein Coding	P36894	64	GC10P134387	78.018	https://www.genecards.org/cgi-bin/carddisp.pl?gene=BMPR1A
GLP1R	Glucagon Like Peptide 1 Receptor	Protein Coding	P43220	59	GC06P039048	77.917	https://www.genecards.org/cgi-bin/carddisp.pl?gene=GLP1R
NCF2	Neutrophil Cytosolic Factor 2	Protein Coding	P19878	60	GC01M187414	77.7849	https://www.genecards.org/cgi-bin/carddisp.pl?gene=NCF2
WRN	WRN RecQ Like Helicase	Protein Coding	Q14191	60	GC08P031033	77.7836	https://www.genecards.org/cgi-bin/carddisp.pl?gene=WRN
FTO	FTO Alpha-Ketoglutarate Dependent Dioxygenase	Protein Coding	Q9C0B1	58	GC16P137301	77.7382	https://www.genecards.org/cgi-bin/carddisp.pl?gene=FTO
PON1	Paraoxonase 1	Protein Coding	P27169	59	GC07M095297	77.6446	https://www.genecards.org/cgi-bin/carddisp.pl?gene=PON1
COL4A2	Collagen Type IV Alpha 2 Chain	Protein Coding	P08572	58	GC13P110305	77.4984	https://www.genecards.org/cgi-bin/carddisp.pl?gene=COL4A2
RELN	Reelin	Protein Coding	P78509	56	GC07M103471	77.4524	https://www.genecards.org/cgi-bin/carddisp.pl?gene=RELN
TBC1D4	TBC1 Domain Family Member 4	Protein Coding	O60343	54	GC13M075284	77.3406	https://www.genecards.org/cgi-bin/carddisp.pl?gene=TBC1D4
HSPB1	Heat Shock Protein Family B (Small) Member 1	Protein Coding	P04792	64	GC07P076302	77.2092	https://www.genecards.org/cgi-bin/carddisp.pl?gene=HSPB1
ADRA2A	Adrenoceptor Alpha 2A	Protein Coding	P08913	60	GC10P111077	76.6543	https://www.genecards.org/cgi-bin/carddisp.pl?gene=ADRA2A
KRAS	KRAS Proto-Oncogene, GTPase	Protein Coding	P01116	66	GC12M039202	76.5094	https://www.genecards.org/cgi-bin/carddisp.pl?gene=KRAS
TMEM70	Transmembrane Protein 70	Protein Coding	Q9BUB7	50	GC08P073972	76.5031	https://www.genecards.org/cgi-bin/carddisp.pl?gene=TMEM70
DHTKD1	Dehydrogenase E1 And Transketolase Domain Containing 1	Protein Coding	Q96HY7	52	GC10P012068	76.3915	https://www.genecards.org/cgi-bin/carddisp.pl?gene=DHTKD1
FASLG	Fas Ligand	Protein Coding	P48023	60	GC01P172659	76.3484	https://www.genecards.org/cgi-bin/carddisp.pl?gene=FASLG
SIRT1	Sirtuin 1	Protein Coding	Q96EB6	62	GC10P067884	76.2927	https://www.genecards.org/cgi-bin/carddisp.pl?gene=SIRT1
ATP7A	ATPase Copper Transporting Alpha	Protein Coding	Q04656	58	GC0XP078297	76.2461	https://www.genecards.org/cgi-bin/carddisp.pl?gene=ATP7A
COL11A2	Collagen Type XI Alpha 2 Chain	Protein Coding	P13942	55	GC06M033162	76.1488	https://www.genecards.org/cgi-bin/carddisp.pl?gene=COL11A2
NOTCH2	Notch Receptor 2	Protein Coding	Q04721	65	GC01M119911	76.0695	https://www.genecards.org/cgi-bin/carddisp.pl?gene=NOTCH2
COL4A1	Collagen Type IV Alpha 1 Chain	Protein Coding	P02462	59	GC13M110148	76.0095	https://www.genecards.org/cgi-bin/carddisp.pl?gene=COL4A1
APP	Amyloid Beta Precursor Protein	Protein Coding	P05067	63	GC21M025880	75.9844	https://www.genecards.org/cgi-bin/carddisp.pl?gene=APP
CACNA1C	Calcium Voltage-Gated Channel Subunit Alpha1 C	Protein Coding	Q13936	61	GC12P001970	75.8535	https://www.genecards.org/cgi-bin/carddisp.pl?gene=CACNA1C
ARSA	Arylsulfatase A	Protein Coding	P15289	59	GC22M050622	75.834	https://www.genecards.org/cgi-bin/carddisp.pl?gene=ARSA
ENG	Endoglin	Protein Coding	P17813	60	GC09M134668	75.6819	https://www.genecards.org/cgi-bin/carddisp.pl?gene=ENG
CC2D2A	Coiled-Coil And C2 Domain Containing 2A	Protein Coding	Q9P2K1	51	GC04P034320	75.6365	https://www.genecards.org/cgi-bin/carddisp.pl?gene=CC2D2A
GCG	Glucagon	Protein Coding	P01275	54	GC02M162142	75.4262	https://www.genecards.org/cgi-bin/carddisp.pl?gene=GCG
AGT	Angiotensinogen	Protein Coding	P01019	62	GC01M230690	75.1922	https://www.genecards.org/cgi-bin/carddisp.pl?gene=AGT
TOR1AIP1	Torsin 1A Interacting Protein 1	Protein Coding	Q5JTV8	51	GC01P179882	75.0695	https://www.genecards.org/cgi-bin/carddisp.pl?gene=TOR1AIP1
PTPRN	Protein Tyrosine Phosphatase Receptor Type N	Protein Coding	Q16849	57	GC02M219289	75.0396	https://www.genecards.org/cgi-bin/carddisp.pl?gene=PTPRN
EGR2	Early Growth Response 2	Protein Coding	P11161	57	GC10M062811	75.0026	https://www.genecards.org/cgi-bin/carddisp.pl?gene=EGR2
RBPJ	Recombination Signal Binding Protein For Immunoglobulin Kappa J Region	Protein Coding	Q06330	58	GC04P026105	74.8514	https://www.genecards.org/cgi-bin/carddisp.pl?gene=RBPJ
DGAT2	Diacylglycerol O-Acyltransferase 2	Protein Coding	Q96PD7	56	GC11P075759	74.8206	https://www.genecards.org/cgi-bin/carddisp.pl?gene=DGAT2
TFG	Trafficking From ER To Golgi Regulator	Protein Coding	Q92734	54	GC03P100709	74.8174	https://www.genecards.org/cgi-bin/carddisp.pl?gene=TFG
CACNA1S	Calcium Voltage-Gated Channel Subunit Alpha1 S	Protein Coding	Q13698	61	GC01M201008	74.81	https://www.genecards.org/cgi-bin/carddisp.pl?gene=CACNA1S
XDH	Xanthine Dehydrogenase	Protein Coding	P47989	60	GC02M031334	74.6552	https://www.genecards.org/cgi-bin/carddisp.pl?gene=XDH
PLA2G6	Phospholipase A2 Group VI	Protein Coding	O60733	60	GC22M092367	74.6233	https://www.genecards.org/cgi-bin/carddisp.pl?gene=PLA2G6
AGL	Amylo-Alpha-1,6-Glucosidase And 4-Alpha-Glucanotransferase	Protein Coding	P35573	58	GC01P099899	74.4878	https://www.genecards.org/cgi-bin/carddisp.pl?gene=AGL
CASP3	Caspase 3	Protein Coding	P42574	62	GC04M184627	74.4856	https://www.genecards.org/cgi-bin/carddisp.pl?gene=CASP3
UGT1A1	UDP Glucuronosyltransferase Family 1 Member A1	Protein Coding	P22309	63	GC02P233760	74.4745	https://www.genecards.org/cgi-bin/carddisp.pl?gene=UGT1A1
HRAS	HRas Proto-Oncogene, GTPase	Protein Coding	P01112	64	GC11M016453	74.4529	https://www.genecards.org/cgi-bin/carddisp.pl?gene=HRAS
NPC2	NPC Intracellular Cholesterol Transporter 2	Protein Coding	P61916	55	GC14M074476	74.2555	https://www.genecards.org/cgi-bin/carddisp.pl?gene=NPC2
SBF2	SET Binding Factor 2	Protein Coding	Q86WG5	50	GC11M016921	74.2127	https://www.genecards.org/cgi-bin/carddisp.pl?gene=SBF2
PIK3R1	Phosphoinositide-3-Kinase Regulatory Subunit 1	Protein Coding	P27986	64	GC05P068215	74.1341	https://www.genecards.org/cgi-bin/carddisp.pl?gene=PIK3R1
NPHS1	NPHS1 Adhesion Molecule, Nephrin	Protein Coding	O60500	60	GC19M035825	74.0888	https://www.genecards.org/cgi-bin/carddisp.pl?gene=NPHS1
RAB27A	RAB27A, Member RAS Oncogene Family	Protein Coding	P51159	60	GC15M055202	74.0394	https://www.genecards.org/cgi-bin/carddisp.pl?gene=RAB27A
SLC17A5	Solute Carrier Family 17 Member 5	Protein Coding	Q9NRA2	57	GC06M073593	74.0173	https://www.genecards.org/cgi-bin/carddisp.pl?gene=SLC17A5
BMPR1B	Bone Morphogenetic Protein Receptor Type 1B	Protein Coding	O00238	60	GC04P094757	73.965	https://www.genecards.org/cgi-bin/carddisp.pl?gene=BMPR1B
CAV1	Caveolin 1	Protein Coding	Q03135	61	GC07P116524	73.6072	https://www.genecards.org/cgi-bin/carddisp.pl?gene=CAV1
TGFBR1	Transforming Growth Factor Beta Receptor 1	Protein Coding	P36897	66	GC09P159927	73.4098	https://www.genecards.org/cgi-bin/carddisp.pl?gene=TGFBR1
RPGRIP1L	RPGRIP1 Like	Protein Coding	Q68CZ1	52	GC16M057723	73.4061	https://www.genecards.org/cgi-bin/carddisp.pl?gene=RPGRIP1L
ADGRV1	Adhesion G Protein-Coupled Receptor V1	Protein Coding	Q8WXG9	52	GC05P090529	73.3631	https://www.genecards.org/cgi-bin/carddisp.pl?gene=ADGRV1
GUSB	Glucuronidase Beta	Protein Coding	P08236	61	GC07M065960	73.2965	https://www.genecards.org/cgi-bin/carddisp.pl?gene=GUSB
NLRP3	NLR Family Pyrin Domain Containing 3	Protein Coding	Q96P20	61	GC01P247741	73.1637	https://www.genecards.org/cgi-bin/carddisp.pl?gene=NLRP3
HLA-DQA1	Major Histocompatibility Complex, Class II, DQ Alpha 1	Protein Coding	P01909	55	GC06P199557	73.0993	https://www.genecards.org/cgi-bin/carddisp.pl?gene=HLA-DQA1
IGF2	Insulin Like Growth Factor 2	Protein Coding	P01344	61	GC11M016606	73.0631	https://www.genecards.org/cgi-bin/carddisp.pl?gene=IGF2
SDHB	Succinate Dehydrogenase Complex Iron Sulfur Subunit B	Protein Coding	P21912	61	GC01M040972	72.9598	https://www.genecards.org/cgi-bin/carddisp.pl?gene=SDHB
LIPA	Lipase A, Lysosomal Acid Type	Protein Coding	P38571	61	GC10M089213	72.8444	https://www.genecards.org/cgi-bin/carddisp.pl?gene=LIPA
PRKN	Parkin RBR E3 Ubiquitin Protein Ligase	Protein Coding	O60260	61	GC06M161348	72.6593	https://www.genecards.org/cgi-bin/carddisp.pl?gene=PRKN
C12orf43	Chromosome 12 Open Reading Frame 43	Protein Coding	Q96C57	44	GC12M121000	72.6112	https://www.genecards.org/cgi-bin/carddisp.pl?gene=C12orf43
IDUA	Alpha-L-Iduronidase	Protein Coding	P35475	57	GC04P000986	72.5779	https://www.genecards.org/cgi-bin/carddisp.pl?gene=IDUA
SCN11A	Sodium Voltage-Gated Channel Alpha Subunit 11	Protein Coding	Q9UI33	55	GC03M038926	72.4792	https://www.genecards.org/cgi-bin/carddisp.pl?gene=SCN11A
MTHFR	Methylenetetrahydrofolate Reductase	Protein Coding	P42898	61	GC01M011785	72.3899	https://www.genecards.org/cgi-bin/carddisp.pl?gene=MTHFR
KDR	Kinase Insert Domain Receptor	Protein Coding	P35968	67	GC04M055078	72.3876	https://www.genecards.org/cgi-bin/carddisp.pl?gene=KDR
CASR	Calcium Sensing Receptor	Protein Coding	P41180	63	GC03P122183	72.0842	https://www.genecards.org/cgi-bin/carddisp.pl?gene=CASR
GNPTAB	N-Acetylglucosamine-1-Phosphate Transferase Subunits Alpha And Beta	Protein Coding	Q3T906	54	GC12M101745	72.0398	https://www.genecards.org/cgi-bin/carddisp.pl?gene=GNPTAB
ABCA1	ATP Binding Cassette Subfamily A Member 1	Protein Coding	O95477	61	GC09M104781	71.7684	https://www.genecards.org/cgi-bin/carddisp.pl?gene=ABCA1
MECP2	Methyl-CpG Binding Protein 2	Protein Coding	P51608	59	GC0XM154021	71.6934	https://www.genecards.org/cgi-bin/carddisp.pl?gene=MECP2
OAS1	2''-5''-Oligoadenylate Synthetase 1	Protein Coding	P00973	57	GC12P113513	71.6523	https://www.genecards.org/cgi-bin/carddisp.pl?gene=OAS1
NFKBIA	NFKB Inhibitor Alpha	Protein Coding	P25963	63	GC14M035401	71.6487	https://www.genecards.org/cgi-bin/carddisp.pl?gene=NFKBIA
MET	MET Proto-Oncogene, Receptor Tyrosine Kinase	Protein Coding	P08581	67	GC07P116672	71.5364	https://www.genecards.org/cgi-bin/carddisp.pl?gene=MET
FKRP	Fukutin Related Protein	Protein Coding	Q9H9S5	51	GC19P171875	71.4475	https://www.genecards.org/cgi-bin/carddisp.pl?gene=FKRP
PTF1A	Pancreas Associated Transcription Factor 1a	Protein Coding	Q7RTS3	54	GC10P023194	71.2326	https://www.genecards.org/cgi-bin/carddisp.pl?gene=PTF1A
IL4	Interleukin 4	Protein Coding	P05112	59	GC05P132673	71.1705	https://www.genecards.org/cgi-bin/carddisp.pl?gene=IL4
CP	Ceruloplasmin	Protein Coding	P00450	62	GC03M149162	71.1164	https://www.genecards.org/cgi-bin/carddisp.pl?gene=CP
EDNRB	Endothelin Receptor Type B	Protein Coding	P24530	63	GC13M077895	71.1056	https://www.genecards.org/cgi-bin/carddisp.pl?gene=EDNRB
MALAT1	Metastasis Associated Lung Adenocarcinoma Transcript 1	RNA Gene		32	GC11P129900	71.1003	https://www.genecards.org/cgi-bin/carddisp.pl?gene=MALAT1
SMAD4	SMAD Family Member 4	Protein Coding	Q13485	66	GC18P051028	70.9243	https://www.genecards.org/cgi-bin/carddisp.pl?gene=SMAD4
RECQL4	RecQ Like Helicase 4	Protein Coding	O94761	53	GC08M147797	70.4361	https://www.genecards.org/cgi-bin/carddisp.pl?gene=RECQL4
EZH2	Enhancer Of Zeste 2 Polycomb Repressive Complex 2 Subunit	Protein Coding	Q15910	66	GC07M148807	70.4077	https://www.genecards.org/cgi-bin/carddisp.pl?gene=EZH2
PIGO	Phosphatidylinositol Glycan Anchor Biosynthesis Class O	Protein Coding	Q8TEQ8	52	GC09M036514	70.4034	https://www.genecards.org/cgi-bin/carddisp.pl?gene=PIGO
ADRB2	Adrenoceptor Beta 2	Protein Coding	P07550	61	GC05P162652	70.3691	https://www.genecards.org/cgi-bin/carddisp.pl?gene=ADRB2
PRX	Periaxin	Protein Coding	Q9BXM0	53	GC19M040393	70.2946	https://www.genecards.org/cgi-bin/carddisp.pl?gene=PRX
SGSH	N-Sulfoglucosamine Sulfohydrolase	Protein Coding	P51688	60	GC17M105728	70.2771	https://www.genecards.org/cgi-bin/carddisp.pl?gene=SGSH
FGF2	Fibroblast Growth Factor 2	Protein Coding	P09038	59	GC04P122826	70.2578	https://www.genecards.org/cgi-bin/carddisp.pl?gene=FGF2
CRP	C-Reactive Protein	Protein Coding	P02741	58	GC01M169920	70.1527	https://www.genecards.org/cgi-bin/carddisp.pl?gene=CRP
HBB	Hemoglobin Subunit Beta	Protein Coding	P68871	58	GC11M016716	70.0243	https://www.genecards.org/cgi-bin/carddisp.pl?gene=HBB
GAS5	Growth Arrest Specific 5	RNA Gene		32	GC01M175245	69.9535	https://www.genecards.org/cgi-bin/carddisp.pl?gene=GAS5
ITPR3	Inositol 1,4,5-Trisphosphate Receptor Type 3	Protein Coding	Q14573	58	GC06P033620	69.9437	https://www.genecards.org/cgi-bin/carddisp.pl?gene=ITPR3
ITPR1	Inositol 1,4,5-Trisphosphate Receptor Type 1	Protein Coding	Q14643	61	GC03P004512	69.846	https://www.genecards.org/cgi-bin/carddisp.pl?gene=ITPR1
CD40LG	CD40 Ligand	Protein Coding	P29965	62	GC0XP136649	69.8408	https://www.genecards.org/cgi-bin/carddisp.pl?gene=CD40LG
CFTR	CF Transmembrane Conductance Regulator	Protein Coding	P13569	66	GC07P117287	69.785	https://www.genecards.org/cgi-bin/carddisp.pl?gene=CFTR
UMOD	Uromodulin	Protein Coding	P07911	55	GC16M055839	69.7584	https://www.genecards.org/cgi-bin/carddisp.pl?gene=UMOD
CASP8	Caspase 8	Protein Coding	Q14790	64	GC02P201233	69.7566	https://www.genecards.org/cgi-bin/carddisp.pl?gene=CASP8
PRKCD	Protein Kinase C Delta	Protein Coding	Q05655	65	GC03P053156	69.7425	https://www.genecards.org/cgi-bin/carddisp.pl?gene=PRKCD
PCDH15	Protocadherin Related 15	Protein Coding	Q96QU1	54	GC10M053802	69.7045	https://www.genecards.org/cgi-bin/carddisp.pl?gene=PCDH15
ALMS1	ALMS1 Centrosome And Basal Body Associated Protein	Protein Coding	Q8TCU4	51	GC02P073385	69.6429	https://www.genecards.org/cgi-bin/carddisp.pl?gene=ALMS1
KCNJ1	Potassium Inwardly Rectifying Channel Subfamily J Member 1	Protein Coding	P48048	60	GC11M147217	69.4402	https://www.genecards.org/cgi-bin/carddisp.pl?gene=KCNJ1
DAG1	Dystroglycan 1	Protein Coding	Q14118	58	GC03P069262	69.43	https://www.genecards.org/cgi-bin/carddisp.pl?gene=DAG1
BTK	Bruton Tyrosine Kinase	Protein Coding	Q06187	66	GC0XM101349	69.3318	https://www.genecards.org/cgi-bin/carddisp.pl?gene=BTK
APOC2	Apolipoprotein C2	Protein Coding	P02655	57	GC19P044945	69.3156	https://www.genecards.org/cgi-bin/carddisp.pl?gene=APOC2
ERCC2	ERCC Excision Repair 2, TFIIH Core Complex Helicase Subunit	Protein Coding	P18074	61	GC19M045349	69.3047	https://www.genecards.org/cgi-bin/carddisp.pl?gene=ERCC2
ATXN2	Ataxin 2	Protein Coding	Q99700	55	GC12M111443	69.2292	https://www.genecards.org/cgi-bin/carddisp.pl?gene=ATXN2
SLC40A1	Solute Carrier Family 40 Member 1	Protein Coding	Q9NP59	61	GC02M189560	69.0492	https://www.genecards.org/cgi-bin/carddisp.pl?gene=SLC40A1
GMPPB	GDP-Mannose Pyrophosphorylase B	Protein Coding	Q9Y5P6	55	GC03M049716	68.9248	https://www.genecards.org/cgi-bin/carddisp.pl?gene=GMPPB
SOX10	SRY-Box Transcription Factor 10	Protein Coding	P56693	58	GC22M092395	68.7608	https://www.genecards.org/cgi-bin/carddisp.pl?gene=SOX10
DCTN1	Dynactin Subunit 1	Protein Coding	Q14203	59	GC02M074361	68.6234	https://www.genecards.org/cgi-bin/carddisp.pl?gene=DCTN1
TGFB2	Transforming Growth Factor Beta 2	Protein Coding	P61812	63	GC01P218345	68.4076	https://www.genecards.org/cgi-bin/carddisp.pl?gene=TGFB2
LIPG	Lipase G, Endothelial Type	Protein Coding	Q9Y5X9	57	GC18P049560	68.377	https://www.genecards.org/cgi-bin/carddisp.pl?gene=LIPG
TSPAN1	Tetraspanin 1	Protein Coding	O60635	51	GC01P095075	68.2954	https://www.genecards.org/cgi-bin/carddisp.pl?gene=TSPAN1
B2M	Beta-2-Microglobulin	Protein Coding	P61769	62	GC15P044711	68.236	https://www.genecards.org/cgi-bin/carddisp.pl?gene=B2M
TYR	Tyrosinase	Protein Coding	P14679	60	GC11P089177	68.2066	https://www.genecards.org/cgi-bin/carddisp.pl?gene=TYR
CYP3A4	Cytochrome P450 Family 3 Subfamily A Member 4	Protein Coding	P08684	62	GC07M107343	68.1193	https://www.genecards.org/cgi-bin/carddisp.pl?gene=CYP3A4
RAF1	Raf-1 Proto-Oncogene, Serine/Threonine Kinase	Protein Coding	P04049	67	GC03M012583	67.7427	https://www.genecards.org/cgi-bin/carddisp.pl?gene=RAF1
NOTCH3	Notch Receptor 3	Protein Coding	Q9UM47	64	GC19M015159	67.7014	https://www.genecards.org/cgi-bin/carddisp.pl?gene=NOTCH3
GATA6	GATA Binding Protein 6	Protein Coding	Q92908	60	GC18P027865	67.6139	https://www.genecards.org/cgi-bin/carddisp.pl?gene=GATA6
PLAU	Plasminogen Activator, Urokinase	Protein Coding	P00749	64	GC10P077004	67.5681	https://www.genecards.org/cgi-bin/carddisp.pl?gene=PLAU
NOS2	Nitric Oxide Synthase 2	Protein Coding	P35228	61	GC17M027756	67.5676	https://www.genecards.org/cgi-bin/carddisp.pl?gene=NOS2
LIFR	LIF Receptor Subunit Alpha	Protein Coding	P42702	59	GC05M039274	67.5191	https://www.genecards.org/cgi-bin/carddisp.pl?gene=LIFR
GCDH	Glutaryl-CoA Dehydrogenase	Protein Coding	Q92947	57	GC19P012891	67.4879	https://www.genecards.org/cgi-bin/carddisp.pl?gene=GCDH
CXCL8	C-X-C Motif Chemokine Ligand 8	Protein Coding	P10145	56	GC04P073740	67.2872	https://www.genecards.org/cgi-bin/carddisp.pl?gene=CXCL8
ARSB	Arylsulfatase B	Protein Coding	P15848	59	GC05M078777	67.2098	https://www.genecards.org/cgi-bin/carddisp.pl?gene=ARSB
POLG	DNA Polymerase Gamma, Catalytic Subunit	Protein Coding	P54098	61	GC15M170768	67.1852	https://www.genecards.org/cgi-bin/carddisp.pl?gene=POLG
PYGM	Glycogen Phosphorylase, Muscle Associated	Protein Coding	P11217	59	GC11M064746	67.1623	https://www.genecards.org/cgi-bin/carddisp.pl?gene=PYGM
WT1	WT1 Transcription Factor	Protein Coding	P19544	60	GC11M032365	67.1586	https://www.genecards.org/cgi-bin/carddisp.pl?gene=WT1
SLC25A13	Solute Carrier Family 25 Member 13	Protein Coding	Q9UJS0	58	GC07M096120	67.1089	https://www.genecards.org/cgi-bin/carddisp.pl?gene=SLC25A13
EXT1	Exostosin Glycosyltransferase 1	Protein Coding	Q16394	60	GC08M117798	67.0287	https://www.genecards.org/cgi-bin/carddisp.pl?gene=EXT1
ITGB2	Integrin Subunit Beta 2	Protein Coding	P05107	63	GC21M044885	66.9465	https://www.genecards.org/cgi-bin/carddisp.pl?gene=ITGB2
NLRP12	NLR Family Pyrin Domain Containing 12	Protein Coding	P59046	54	GC19M116775	66.892	https://www.genecards.org/cgi-bin/carddisp.pl?gene=NLRP12
PVT1	Pvt1 Oncogene	RNA Gene		32	GC08P128542	66.8287	https://www.genecards.org/cgi-bin/carddisp.pl?gene=PVT1
REN	Renin	Protein Coding	P00797	61	GC01M204154	66.8133	https://www.genecards.org/cgi-bin/carddisp.pl?gene=REN
MME	Membrane Metalloendopeptidase	Protein Coding	P08473	62	GC03P155024	66.7752	https://www.genecards.org/cgi-bin/carddisp.pl?gene=MME
SDHD	Succinate Dehydrogenase Complex Subunit D	Protein Coding	O14521	57	GC11P131510	66.7082	https://www.genecards.org/cgi-bin/carddisp.pl?gene=SDHD
MAP2K1	Mitogen-Activated Protein Kinase Kinase 1	Protein Coding	Q02750	67	GC15P066386	66.6887	https://www.genecards.org/cgi-bin/carddisp.pl?gene=MAP2K1
MORC2	MORC Family CW-Type Zinc Finger 2	Protein Coding	Q9Y6X9	52	GC22M030925	66.6286	https://www.genecards.org/cgi-bin/carddisp.pl?gene=MORC2
OFD1	OFD1 Centriole And Centriolar Satellite Protein	Protein Coding	O75665	54	GC0XP013714	66.5917	https://www.genecards.org/cgi-bin/carddisp.pl?gene=OFD1
FIG4	FIG4 Phosphoinositide 5-Phosphatase	Protein Coding	Q92562	55	GC06P200380	66.5836	https://www.genecards.org/cgi-bin/carddisp.pl?gene=FIG4
SMCHD1	Structural Maintenance Of Chromosomes Flexible Hinge Domain Containing 1	Protein Coding	A6NHR9	52	GC18P002655	66.5095	https://www.genecards.org/cgi-bin/carddisp.pl?gene=SMCHD1
PPARGC1A	PPARG Coactivator 1 Alpha	Protein Coding	Q9UBK2	60	GC04M023755	66.4698	https://www.genecards.org/cgi-bin/carddisp.pl?gene=PPARGC1A
ATP13A2	ATPase Cation Transporting 13A2	Protein Coding	Q9NQ11	56	GC01M016985	66.4447	https://www.genecards.org/cgi-bin/carddisp.pl?gene=ATP13A2
GREM1	Gremlin 1, DAN Family BMP Antagonist	Protein Coding	O60565	58	GC15P210191	66.414	https://www.genecards.org/cgi-bin/carddisp.pl?gene=GREM1
AGTR2	Angiotensin II Receptor Type 2	Protein Coding	P50052	56	GC0XP116170	66.4121	https://www.genecards.org/cgi-bin/carddisp.pl?gene=AGTR2
NRXN1	Neurexin 1	Protein Coding	Q9ULB1	60	GC02M049918	66.2814	https://www.genecards.org/cgi-bin/carddisp.pl?gene=NRXN1
SCO2	Synthesis Of Cytochrome C Oxidase 2	Protein Coding	O43819	58	GC22M050523	66.1262	https://www.genecards.org/cgi-bin/carddisp.pl?gene=SCO2
CYP27B1	Cytochrome P450 Family 27 Subfamily B Member 1	Protein Coding	O15528	60	GC12M061025	66.1016	https://www.genecards.org/cgi-bin/carddisp.pl?gene=CYP27B1
CHEK2	Checkpoint Kinase 2	Protein Coding	O96017	67	GC22M028687	65.8503	https://www.genecards.org/cgi-bin/carddisp.pl?gene=CHEK2
GDAP1	Ganglioside Induced Differentiation Associated Protein 1	Protein Coding	Q8TB36	54	GC08P074315	65.8497	https://www.genecards.org/cgi-bin/carddisp.pl?gene=GDAP1
HSD11B2	Hydroxysteroid 11-Beta Dehydrogenase 2	Protein Coding	P80365	57	GC16P137636	65.8255	https://www.genecards.org/cgi-bin/carddisp.pl?gene=HSD11B2
FKTN	Fukutin	Protein Coding	O75072	52	GC09P105558	65.7973	https://www.genecards.org/cgi-bin/carddisp.pl?gene=FKTN
AICDA	Activation Induced Cytidine Deaminase	Protein Coding	Q9GZX7	56	GC12M008602	65.6528	https://www.genecards.org/cgi-bin/carddisp.pl?gene=AICDA
CDKL5	Cyclin Dependent Kinase Like 5	Protein Coding	O76039	55	GC0XP018425	65.6385	https://www.genecards.org/cgi-bin/carddisp.pl?gene=CDKL5
GATA4	GATA Binding Protein 4	Protein Coding	P43694	61	GC08P011676	65.6171	https://www.genecards.org/cgi-bin/carddisp.pl?gene=GATA4
NAGA	Alpha-N-Acetylgalactosaminidase	Protein Coding	P17050	57	GC22M042058	65.612	https://www.genecards.org/cgi-bin/carddisp.pl?gene=NAGA
NPR2	Natriuretic Peptide Receptor 2	Protein Coding	P20594	60	GC09P085567	65.5711	https://www.genecards.org/cgi-bin/carddisp.pl?gene=NPR2
SRD5A2	Steroid 5 Alpha-Reductase 2	Protein Coding	P31213	54	GC02M031522	65.5681	https://www.genecards.org/cgi-bin/carddisp.pl?gene=SRD5A2
BMPR2	Bone Morphogenetic Protein Receptor Type 2	Protein Coding	Q13873	63	GC02P202376	65.5493	https://www.genecards.org/cgi-bin/carddisp.pl?gene=BMPR2
APPL1	Adaptor Protein, Phosphotyrosine Interacting With PH Domain And Leucine Zipper 1	Protein Coding	Q9UKG1	57	GC03P057227	65.5417	https://www.genecards.org/cgi-bin/carddisp.pl?gene=APPL1
TRPM4	Transient Receptor Potential Cation Channel Subfamily M Member 4	Protein Coding	Q8TD43	55	GC19P049157	65.4631	https://www.genecards.org/cgi-bin/carddisp.pl?gene=TRPM4
P3H1	Prolyl 3-Hydroxylase 1	Protein Coding	Q32P28	52	GC01M042746	65.2599	https://www.genecards.org/cgi-bin/carddisp.pl?gene=P3H1
IFIH1	Interferon Induced With Helicase C Domain 1	Protein Coding	Q9BYX4	60	GC02M162267	65.1545	https://www.genecards.org/cgi-bin/carddisp.pl?gene=IFIH1
SOD2	Superoxide Dismutase 2	Protein Coding	P04179	60	GC06M159669	65.1516	https://www.genecards.org/cgi-bin/carddisp.pl?gene=SOD2
HAMP	Hepcidin Antimicrobial Peptide	Protein Coding	P81172	55	GC19P171516	64.9588	https://www.genecards.org/cgi-bin/carddisp.pl?gene=HAMP
HHEX	Hematopoietically Expressed Homeobox	Protein Coding	Q03014	54	GC10P092689	64.8926	https://www.genecards.org/cgi-bin/carddisp.pl?gene=HHEX
DBT	Dihydrolipoamide Branched Chain Transacylase E2	Protein Coding	P11182	55	GC01M100186	64.7627	https://www.genecards.org/cgi-bin/carddisp.pl?gene=DBT
ERCC6	ERCC Excision Repair 6, Chromatin Remodeling Factor	Protein Coding	Q03468	59	GC10M049927	64.7064	https://www.genecards.org/cgi-bin/carddisp.pl?gene=ERCC6
TH	Tyrosine Hydroxylase	Protein Coding	P07101	63	GC11M002163	64.6953	https://www.genecards.org/cgi-bin/carddisp.pl?gene=TH
COL9A2	Collagen Type IX Alpha 2 Chain	Protein Coding	Q14055	53	GC01M040300	64.6507	https://www.genecards.org/cgi-bin/carddisp.pl?gene=COL9A2
TNFRSF1A	TNF Receptor Superfamily Member 1A	Protein Coding	P19438	61	GC12M006328	64.3549	https://www.genecards.org/cgi-bin/carddisp.pl?gene=TNFRSF1A
TPP1	Tripeptidyl Peptidase 1	Protein Coding	O14773	58	GC11M016821	64.3253	https://www.genecards.org/cgi-bin/carddisp.pl?gene=TPP1
LAMB2	Laminin Subunit Beta 2	Protein Coding	P55268	57	GC03M049121	64.1413	https://www.genecards.org/cgi-bin/carddisp.pl?gene=LAMB2
PMP22	Peripheral Myelin Protein 22	Protein Coding	Q01453	56	GC17M015229	64.1367	https://www.genecards.org/cgi-bin/carddisp.pl?gene=PMP22
MTMR2	Myotubularin Related Protein 2	Protein Coding	Q13614	57	GC11M146741	64.1125	https://www.genecards.org/cgi-bin/carddisp.pl?gene=MTMR2
TRPS1	Transcriptional Repressor GATA Binding 1	Protein Coding	Q9UHF7	55	GC08M115408	64.0979	https://www.genecards.org/cgi-bin/carddisp.pl?gene=TRPS1
ATP6V0A2	ATPase H+ Transporting V0 Subunit A2	Protein Coding	Q9Y487	55	GC12P123712	64.0582	https://www.genecards.org/cgi-bin/carddisp.pl?gene=ATP6V0A2
GALNS	Galactosamine (N-Acetyl)-6-Sulfatase	Protein Coding	P34059	60	GC16M088813	64.0581	https://www.genecards.org/cgi-bin/carddisp.pl?gene=GALNS
KDM6A	Lysine Demethylase 6A	Protein Coding	O15550	60	GC0XP044873	63.9937	https://www.genecards.org/cgi-bin/carddisp.pl?gene=KDM6A
VCP	Valosin Containing Protein	Protein Coding	P55072	61	GC09M036512	63.969	https://www.genecards.org/cgi-bin/carddisp.pl?gene=VCP
CST3	Cystatin C	Protein Coding	P01034	55	GC20M024276	63.9678	https://www.genecards.org/cgi-bin/carddisp.pl?gene=CST3
TNFSF11	TNF Superfamily Member 11	Protein Coding	O14788	61	GC13P042562	63.9181	https://www.genecards.org/cgi-bin/carddisp.pl?gene=TNFSF11
IDH1	Isocitrate Dehydrogenase (NADP(+)) 1	Protein Coding	O75874	65	GC02M208236	63.8926	https://www.genecards.org/cgi-bin/carddisp.pl?gene=IDH1
CPT1A	Carnitine Palmitoyltransferase 1A	Protein Coding	P50416	61	GC11M068754	63.7836	https://www.genecards.org/cgi-bin/carddisp.pl?gene=CPT1A
BCKDHB	Branched Chain Keto Acid Dehydrogenase E1 Subunit Beta	Protein Coding	P21953	56	GC06P080106	63.7263	https://www.genecards.org/cgi-bin/carddisp.pl?gene=BCKDHB
SMAD3	SMAD Family Member 3	Protein Coding	P84022	66	GC15P067063	63.7073	https://www.genecards.org/cgi-bin/carddisp.pl?gene=SMAD3
MTTP	Microsomal Triglyceride Transfer Protein	Protein Coding	P55157	57	GC04P099563	63.6336	https://www.genecards.org/cgi-bin/carddisp.pl?gene=MTTP
ITGA2	Integrin Subunit Alpha 2	Protein Coding	P17301	59	GC05P052989	63.6308	https://www.genecards.org/cgi-bin/carddisp.pl?gene=ITGA2
B3GALT6	Beta-1,3-Galactosyltransferase 6	Protein Coding	Q96L58	52	GC01P001232	63.608	https://www.genecards.org/cgi-bin/carddisp.pl?gene=B3GALT6
NEUROG3	Neurogenin 3	Protein Coding	Q9Y4Z2	51	GC10M069571	63.5644	https://www.genecards.org/cgi-bin/carddisp.pl?gene=NEUROG3
PROM1	Prominin 1	Protein Coding	O43490	60	GC04M015965	63.554	https://www.genecards.org/cgi-bin/carddisp.pl?gene=PROM1
PLAT	Plasminogen Activator, Tissue Type	Protein Coding	P00750	62	GC08M042174	63.5071	https://www.genecards.org/cgi-bin/carddisp.pl?gene=PLAT
HSPB8	Heat Shock Protein Family B (Small) Member 8	Protein Coding	Q9UJY1	57	GC12P119173	63.4787	https://www.genecards.org/cgi-bin/carddisp.pl?gene=HSPB8
CRPPA	CDP-L-Ribitol Pyrophosphorylase A	Protein Coding	A4D126	49	GC07M016088	63.3658	https://www.genecards.org/cgi-bin/carddisp.pl?gene=CRPPA
GCGR	Glucagon Receptor	Protein Coding	P47871	59	GC17P176570	63.3024	https://www.genecards.org/cgi-bin/carddisp.pl?gene=GCGR
CCR5	C-C Motif Chemokine Receptor 5	Protein Coding	P51681	59	GC03P069070	63.2275	https://www.genecards.org/cgi-bin/carddisp.pl?gene=CCR5
ICAM1	Intercellular Adhesion Molecule 1	Protein Coding	P05362	62	GC19P170923	63.1873	https://www.genecards.org/cgi-bin/carddisp.pl?gene=ICAM1
KCNJ2	Potassium Inwardly Rectifying Channel Subfamily J Member 2	Protein Coding	P63252	61	GC17P070168	63.1673	https://www.genecards.org/cgi-bin/carddisp.pl?gene=KCNJ2
SPINK1	Serine Peptidase Inhibitor Kazal Type 1	Protein Coding	P00995	54	GC05M147825	63.1539	https://www.genecards.org/cgi-bin/carddisp.pl?gene=SPINK1
SPG11	SPG11 Vesicle Trafficking Associated, Spatacsin	Protein Coding	Q96JI7	51	GC15M169708	63.1261	https://www.genecards.org/cgi-bin/carddisp.pl?gene=SPG11
SMAD2	SMAD Family Member 2	Protein Coding	Q15796	64	GC18M047809	63.0482	https://www.genecards.org/cgi-bin/carddisp.pl?gene=SMAD2
HCFC1	Host Cell Factor C1	Protein Coding	P51610	58	GC0XM153979	62.9121	https://www.genecards.org/cgi-bin/carddisp.pl?gene=HCFC1
GJB2	Gap Junction Protein Beta 2	Protein Coding	P29033	58	GC13M020187	62.9	https://www.genecards.org/cgi-bin/carddisp.pl?gene=GJB2
MEG3	Maternally Expressed 3	RNA Gene		36	GC14P123627	62.8129	https://www.genecards.org/cgi-bin/carddisp.pl?gene=MEG3
MVK	Mevalonate Kinase	Protein Coding	Q03426	60	GC12P109573	62.805	https://www.genecards.org/cgi-bin/carddisp.pl?gene=MVK
KCNJ5	Potassium Inwardly Rectifying Channel Subfamily J Member 5	Protein Coding	P48544	60	GC11P132165	62.7993	https://www.genecards.org/cgi-bin/carddisp.pl?gene=KCNJ5
PLIN1	Perilipin 1	Protein Coding	O60240	58	GC15M089664	62.7435	https://www.genecards.org/cgi-bin/carddisp.pl?gene=PLIN1
DGAT1	Diacylglycerol O-Acyltransferase 1	Protein Coding	O75907	60	GC08M147781	62.743	https://www.genecards.org/cgi-bin/carddisp.pl?gene=DGAT1
TAFAZZIN	Tafazzin, Phospholipid-Lysophospholipid Transacylase	Protein Coding	Q16635	52	GC0XP155536	62.6681	https://www.genecards.org/cgi-bin/carddisp.pl?gene=TAFAZZIN
ATP8B1	ATPase Phospholipid Transporting 8B1	Protein Coding	O43520	53	GC18M057646	62.5462	https://www.genecards.org/cgi-bin/carddisp.pl?gene=ATP8B1
IL2RB	Interleukin 2 Receptor Subunit Beta	Protein Coding	P14784	62	GC22M090733	62.5314	https://www.genecards.org/cgi-bin/carddisp.pl?gene=IL2RB
BCL2L1	BCL2 Like 1	Protein Coding	Q07817	62	GC20M031664	62.4733	https://www.genecards.org/cgi-bin/carddisp.pl?gene=BCL2L1
FGF23	Fibroblast Growth Factor 23	Protein Coding	Q9GZV9	57	GC12M004368	62.4663	https://www.genecards.org/cgi-bin/carddisp.pl?gene=FGF23
GRN	Granulin Precursor	Protein Coding	P28799	60	GC17P044345	62.4452	https://www.genecards.org/cgi-bin/carddisp.pl?gene=GRN
HBA1	Hemoglobin Subunit Alpha 1	Protein Coding	P69905	56	GC16P135863	62.2461	https://www.genecards.org/cgi-bin/carddisp.pl?gene=HBA1
NDRG1	N-Myc Downstream Regulated 1	Protein Coding	Q92597	57	GC08M133237	62.1714	https://www.genecards.org/cgi-bin/carddisp.pl?gene=NDRG1
OCA2	OCA2 Melanosomal Transmembrane Protein	Protein Coding	Q04671	55	GC15M050799	62.1577	https://www.genecards.org/cgi-bin/carddisp.pl?gene=OCA2
NFKB1	Nuclear Factor Kappa B Subunit 1	Protein Coding	P19838	66	GC04P102501	62.1088	https://www.genecards.org/cgi-bin/carddisp.pl?gene=NFKB1
FABP2	Fatty Acid Binding Protein 2	Protein Coding	P12104	54	GC04M119317	62.0519	https://www.genecards.org/cgi-bin/carddisp.pl?gene=FABP2
MAPK8IP1	Mitogen-Activated Protein Kinase 8 Interacting Protein 1	Protein Coding	Q9UQF2	56	GC11P049862	62.0474	https://www.genecards.org/cgi-bin/carddisp.pl?gene=MAPK8IP1
DLD	Dihydrolipoamide Dehydrogenase	Protein Coding	P09622	62	GC07P115834	61.9503	https://www.genecards.org/cgi-bin/carddisp.pl?gene=DLD
PTH1R	Parathyroid Hormone 1 Receptor	Protein Coding	Q03431	61	GC03P046877	61.7802	https://www.genecards.org/cgi-bin/carddisp.pl?gene=PTH1R
HMGA1	High Mobility Group AT-Hook 1	Protein Coding	P17096	59	GC06P199625	61.7273	https://www.genecards.org/cgi-bin/carddisp.pl?gene=HMGA1
LCN2	Lipocalin 2	Protein Coding	P80188	58	GC09P128149	61.6686	https://www.genecards.org/cgi-bin/carddisp.pl?gene=LCN2
BCKDHA	Branched Chain Keto Acid Dehydrogenase E1 Subunit Alpha	Protein Coding	P12694	56	GC19P171705	61.6412	https://www.genecards.org/cgi-bin/carddisp.pl?gene=BCKDHA
SPTLC1	Serine Palmitoyltransferase Long Chain Base Subunit 1	Protein Coding	O15269	59	GC09M133501	61.5274	https://www.genecards.org/cgi-bin/carddisp.pl?gene=SPTLC1
ITGB3	Integrin Subunit Beta 3	Protein Coding	P05106	64	GC17P175826	61.4794	https://www.genecards.org/cgi-bin/carddisp.pl?gene=ITGB3
AGER	Advanced Glycosylation End-Product Specific Receptor	Protein Coding	Q15109	59	GC06M032180	61.4487	https://www.genecards.org/cgi-bin/carddisp.pl?gene=AGER
HLA-B	Major Histocompatibility Complex, Class I, B	Protein Coding	P01889	59	GC06M114919	61.445	https://www.genecards.org/cgi-bin/carddisp.pl?gene=HLA-B
IER3IP1	Immediate Early Response 3 Interacting Protein 1	Protein Coding	Q9Y5U9	45	GC18M047152	61.4257	https://www.genecards.org/cgi-bin/carddisp.pl?gene=IER3IP1
EMD	Emerin	Protein Coding	P50402	57	GC0XP154379	61.3274	https://www.genecards.org/cgi-bin/carddisp.pl?gene=EMD
TECPR2	Tectonin Beta-Propeller Repeat Containing 2	Protein Coding	O15040	47	GC14P102362	61.2149	https://www.genecards.org/cgi-bin/carddisp.pl?gene=TECPR2
SPTLC2	Serine Palmitoyltransferase Long Chain Base Subunit 2	Protein Coding	O15270	60	GC14M077505	61.1773	https://www.genecards.org/cgi-bin/carddisp.pl?gene=SPTLC2
XIAP	X-Linked Inhibitor Of Apoptosis	Protein Coding	P98170	63	GC0XP123859	61.0963	https://www.genecards.org/cgi-bin/carddisp.pl?gene=XIAP
SRC	SRC Proto-Oncogene, Non-Receptor Tyrosine Kinase	Protein Coding	P12931	63	GC20P037344	61.0917	https://www.genecards.org/cgi-bin/carddisp.pl?gene=SRC
GHR	Growth Hormone Receptor	Protein Coding	P10912	58	GC05P042429	61.0432	https://www.genecards.org/cgi-bin/carddisp.pl?gene=GHR
MYC	MYC Proto-Oncogene, BHLH Transcription Factor	Protein Coding	P01106	65	GC08P127735	61.0432	https://www.genecards.org/cgi-bin/carddisp.pl?gene=MYC
ATP1A2	ATPase Na+/K+ Transporting Subunit Alpha 2	Protein Coding	P50993	61	GC01P160115	60.9889	https://www.genecards.org/cgi-bin/carddisp.pl?gene=ATP1A2
GH1	Growth Hormone 1	Protein Coding	P01241	56	GC17M063917	60.931	https://www.genecards.org/cgi-bin/carddisp.pl?gene=GH1
NEU1	Neuraminidase 1	Protein Coding	Q99519	58	GC06M031857	60.841	https://www.genecards.org/cgi-bin/carddisp.pl?gene=NEU1
TUG1	Taurine Up-Regulated 1	Protein Coding	A0A6I8PU40	33	GC22P030969	60.8375	https://www.genecards.org/cgi-bin/carddisp.pl?gene=TUG1
GYG1	Glycogenin 1	Protein Coding	P46976	58	GC03P148991	60.7946	https://www.genecards.org/cgi-bin/carddisp.pl?gene=GYG1
CLCN2	Chloride Voltage-Gated Channel 2	Protein Coding	P51788	56	GC03M184346	60.6958	https://www.genecards.org/cgi-bin/carddisp.pl?gene=CLCN2
ALG13	ALG13 UDP-N-Acetylglucosaminyltransferase Subunit	Protein Coding	Q9NP73	50	GC0XP111665	60.6775	https://www.genecards.org/cgi-bin/carddisp.pl?gene=ALG13
ATP6AP2	ATPase H+ Transporting Accessory Protein 2	Protein Coding	O75787	57	GC0XP040708	60.6329	https://www.genecards.org/cgi-bin/carddisp.pl?gene=ATP6AP2
PDGFRB	Platelet Derived Growth Factor Receptor Beta	Protein Coding	P09619	66	GC05M150113	60.555	https://www.genecards.org/cgi-bin/carddisp.pl?gene=PDGFRB
GPHN	Gephyrin	Protein Coding	Q9NQX3	61	GC14P066507	60.5174	https://www.genecards.org/cgi-bin/carddisp.pl?gene=GPHN
CISD2	CDGSH Iron Sulfur Domain 2	Protein Coding	Q8N5K1	52	GC04P102868	60.458	https://www.genecards.org/cgi-bin/carddisp.pl?gene=CISD2
GPD2	Glycerol-3-Phosphate Dehydrogenase 2	Protein Coding	P43304	57	GC02P161080	60.4334	https://www.genecards.org/cgi-bin/carddisp.pl?gene=GPD2
CASQ2	Calsequestrin 2	Protein Coding	O14958	57	GC01M115700	60.3543	https://www.genecards.org/cgi-bin/carddisp.pl?gene=CASQ2
LRSAM1	Leucine Rich Repeat And Sterile Alpha Motif Containing 1	Protein Coding	Q6UWE0	51	GC09P127451	60.2305	https://www.genecards.org/cgi-bin/carddisp.pl?gene=LRSAM1
NGF	Nerve Growth Factor	Protein Coding	P01138	64	GC01M115285	60.2197	https://www.genecards.org/cgi-bin/carddisp.pl?gene=NGF
DNM2	Dynamin 2	Protein Coding	P50570	63	GC19P170929	60.1848	https://www.genecards.org/cgi-bin/carddisp.pl?gene=DNM2
GBE1	1,4-Alpha-Glucan Branching Enzyme 1	Protein Coding	Q04446	56	GC03M081489	60.1601	https://www.genecards.org/cgi-bin/carddisp.pl?gene=GBE1
MARS1	Methionyl-TRNA Synthetase 1	Protein Coding	P56192	58	GC12P087091	60.0906	https://www.genecards.org/cgi-bin/carddisp.pl?gene=MARS1
ZFP57	ZFP57 Zinc Finger Protein	Protein Coding	Q9NU63	49	GC06M029672	60.0743	https://www.genecards.org/cgi-bin/carddisp.pl?gene=ZFP57
SERPINF1	Serpin Family F Member 1	Protein Coding	P36955	57	GC17P001761	60.0174	https://www.genecards.org/cgi-bin/carddisp.pl?gene=SERPINF1
CACNA1D	Calcium Voltage-Gated Channel Subunit Alpha1 D	Protein Coding	Q01668	59	GC03P053328	59.9645	https://www.genecards.org/cgi-bin/carddisp.pl?gene=CACNA1D
CCN2	Cellular Communication Network Factor 2	Protein Coding	P29279	59	GC06M131948	59.8461	https://www.genecards.org/cgi-bin/carddisp.pl?gene=CCN2
SCARB1	Scavenger Receptor Class B Member 1	Protein Coding	Q8WTV0	60	GC12M124776	59.8272	https://www.genecards.org/cgi-bin/carddisp.pl?gene=SCARB1
TIMP2	TIMP Metallopeptidase Inhibitor 2	Protein Coding	P16035	54	GC17M078852	59.7718	https://www.genecards.org/cgi-bin/carddisp.pl?gene=TIMP2
TTR	Transthyretin	Protein Coding	P02766	60	GC18P031557	59.7415	https://www.genecards.org/cgi-bin/carddisp.pl?gene=TTR
SLC12A1	Solute Carrier Family 12 Member 1	Protein Coding	Q13621	60	GC15P210564	59.6171	https://www.genecards.org/cgi-bin/carddisp.pl?gene=SLC12A1
GJA1	Gap Junction Protein Alpha 1	Protein Coding	P17302	63	GC06P200587	59.5879	https://www.genecards.org/cgi-bin/carddisp.pl?gene=GJA1
NRAS	NRAS Proto-Oncogene, GTPase	Protein Coding	P01111	63	GC01M114704	59.458	https://www.genecards.org/cgi-bin/carddisp.pl?gene=NRAS
PNPLA3	Patatin Like Domain 3, 1-Acylglycerol-3-Phosphate O-Acyltransferase	Protein Coding	Q9NST1	54	GC22P043923	59.4339	https://www.genecards.org/cgi-bin/carddisp.pl?gene=PNPLA3
HJV	Hemojuvelin BMP Co-Receptor	Protein Coding	Q6ZVN8	55	GC01M169326	59.4325	https://www.genecards.org/cgi-bin/carddisp.pl?gene=HJV
CCND1	Cyclin D1	Protein Coding	P24385	65	GC11P069641	59.3839	https://www.genecards.org/cgi-bin/carddisp.pl?gene=CCND1
PLOD2	Procollagen-Lysine,2-Oxoglutarate 5-Dioxygenase 2	Protein Coding	O00469	58	GC03M146035	59.3424	https://www.genecards.org/cgi-bin/carddisp.pl?gene=PLOD2
RFX6	Regulatory Factor X6	Protein Coding	Q8HWS3	48	GC06P116877	59.3082	https://www.genecards.org/cgi-bin/carddisp.pl?gene=RFX6
CDKN2B	Cyclin Dependent Kinase Inhibitor 2B	Protein Coding	P42772	58	GC09M022002	59.2923	https://www.genecards.org/cgi-bin/carddisp.pl?gene=CDKN2B
BMP6	Bone Morphogenetic Protein 6	Protein Coding	P22004	57	GC06P007726	59.2402	https://www.genecards.org/cgi-bin/carddisp.pl?gene=BMP6
MTRR	5-Methyltetrahydrofolate-Homocysteine Methyltransferase Reductase	Protein Coding	Q9UBK8	56	GC05P008377	59.2149	https://www.genecards.org/cgi-bin/carddisp.pl?gene=MTRR
MYH7	Myosin Heavy Chain 7	Protein Coding	P12883	60	GC14M023412	59.2045	https://www.genecards.org/cgi-bin/carddisp.pl?gene=MYH7
MKS1	MKS Transition Zone Complex Subunit 1	Protein Coding	Q9NXB0	52	GC17M058205	59.201	https://www.genecards.org/cgi-bin/carddisp.pl?gene=MKS1
EFEMP2	EGF-Like Fibulin Extracellular Matrix Protein 2	Protein Coding	O95967	55	GC11M146207	59.1672	https://www.genecards.org/cgi-bin/carddisp.pl?gene=EFEMP2
PLG	Plasminogen	Protein Coding	P00747	62	GC06P160702	59.1296	https://www.genecards.org/cgi-bin/carddisp.pl?gene=PLG
LAMP2	Lysosomal Associated Membrane Protein 2	Protein Coding	P13473	57	GC0XM120426	59.0967	https://www.genecards.org/cgi-bin/carddisp.pl?gene=LAMP2
MCOLN1	Mucolipin TRP Cation Channel 1	Protein Coding	Q9GZU1	55	GC19P170763	59.0891	https://www.genecards.org/cgi-bin/carddisp.pl?gene=MCOLN1
STK11	Serine/Threonine Kinase 11	Protein Coding	Q15831	62	GC19P001177	59.0035	https://www.genecards.org/cgi-bin/carddisp.pl?gene=STK11
POMGNT2	Protein O-Linked Mannose N-Acetylglucosaminyltransferase 2 (Beta 1,4-)	Protein Coding	Q8NAT1	50	GC03M043121	58.9599	https://www.genecards.org/cgi-bin/carddisp.pl?gene=POMGNT2
PFKM	Phosphofructokinase, Muscle	Protein Coding	P08237	61	GC12P048105	58.9535	https://www.genecards.org/cgi-bin/carddisp.pl?gene=PFKM
DOCK8	Dedicator Of Cytokinesis 8	Protein Coding	Q8NF50	58	GC09P000414	58.9382	https://www.genecards.org/cgi-bin/carddisp.pl?gene=DOCK8
AR	Androgen Receptor	Protein Coding	P10275	65	GC0XP067544	58.9281	https://www.genecards.org/cgi-bin/carddisp.pl?gene=AR
PAX3	Paired Box 3	Protein Coding	P23760	57	GC02M222199	58.9207	https://www.genecards.org/cgi-bin/carddisp.pl?gene=PAX3
TRPC6	Transient Receptor Potential Cation Channel Subfamily C Member 6	Protein Coding	Q9Y210	62	GC11M101451	58.9032	https://www.genecards.org/cgi-bin/carddisp.pl?gene=TRPC6
MC4R	Melanocortin 4 Receptor	Protein Coding	P32245	57	GC18M060371	58.8669	https://www.genecards.org/cgi-bin/carddisp.pl?gene=MC4R
CAT	Catalase	Protein Coding	P04040	63	GC11P034460	58.8628	https://www.genecards.org/cgi-bin/carddisp.pl?gene=CAT
KCNA1	Potassium Voltage-Gated Channel Subfamily A Member 1	Protein Coding	Q09470	58	GC12P085675	58.8402	https://www.genecards.org/cgi-bin/carddisp.pl?gene=KCNA1
GABRG2	Gamma-Aminobutyric Acid Type A Receptor Subunit Gamma2	Protein Coding	P18507	61	GC05P162000	58.8307	https://www.genecards.org/cgi-bin/carddisp.pl?gene=GABRG2
SACS	Sacsin Molecular Chaperone	Protein Coding	Q9NZJ4	49	GC13M023288	58.78	https://www.genecards.org/cgi-bin/carddisp.pl?gene=SACS
MTR	5-Methyltetrahydrofolate-Homocysteine Methyltransferase	Protein Coding	Q99707	59	GC01P236795	58.7185	https://www.genecards.org/cgi-bin/carddisp.pl?gene=MTR
F2	Coagulation Factor II, Thrombin	Protein Coding	P00734	63	GC11P049887	58.707	https://www.genecards.org/cgi-bin/carddisp.pl?gene=F2
CPS1	Carbamoyl-Phosphate Synthase 1	Protein Coding	P31327	60	GC02P210477	58.6966	https://www.genecards.org/cgi-bin/carddisp.pl?gene=CPS1
SEC23B	SEC23 Homolog B, COPII Component	Protein Coding	Q15437	52	GC20P018507	58.6783	https://www.genecards.org/cgi-bin/carddisp.pl?gene=SEC23B
AGXT	Alanine--Glyoxylate Aminotransferase	Protein Coding	P21549	58	GC02P240868	58.6775	https://www.genecards.org/cgi-bin/carddisp.pl?gene=AGXT
TERC	Telomerase RNA Component	RNA Gene		36	GC03M169765	58.6203	https://www.genecards.org/cgi-bin/carddisp.pl?gene=TERC
ALDH2	Aldehyde Dehydrogenase 2 Family Member	Protein Coding	P05091	63	GC12P111766	58.5912	https://www.genecards.org/cgi-bin/carddisp.pl?gene=ALDH2
ACTA2	Actin Alpha 2, Smooth Muscle	Protein Coding	P62736	60	GC10M088935	58.447	https://www.genecards.org/cgi-bin/carddisp.pl?gene=ACTA2
USH1C	USH1 Protein Network Component Harmonin	Protein Coding	Q9Y6N9	52	GC11M018565	58.4074	https://www.genecards.org/cgi-bin/carddisp.pl?gene=USH1C
D2HGDH	D-2-Hydroxyglutarate Dehydrogenase	Protein Coding	Q8N465	55	GC02P241734	58.3993	https://www.genecards.org/cgi-bin/carddisp.pl?gene=D2HGDH
COL17A1	Collagen Type XVII Alpha 1 Chain	Protein Coding	Q9UMD9	57	GC10M104405	58.3784	https://www.genecards.org/cgi-bin/carddisp.pl?gene=COL17A1
PDCD1	Programmed Cell Death 1	Protein Coding	Q15116	60	GC02M241849	58.343	https://www.genecards.org/cgi-bin/carddisp.pl?gene=PDCD1
PIK3CG	Phosphatidylinositol-4,5-Bisphosphate 3-Kinase Catalytic Subunit Gamma	Protein Coding	P48736	62	GC07P106865	58.3415	https://www.genecards.org/cgi-bin/carddisp.pl?gene=PIK3CG
CUBN	Cubilin	Protein Coding	O60494	58	GC10M016824	58.3292	https://www.genecards.org/cgi-bin/carddisp.pl?gene=CUBN
ABCA4	ATP Binding Cassette Subfamily A Member 4	Protein Coding	P78363	57	GC01M093992	58.1453	https://www.genecards.org/cgi-bin/carddisp.pl?gene=ABCA4
MMP1	Matrix Metallopeptidase 1	Protein Coding	P03956	63	GC11M146793	58.144	https://www.genecards.org/cgi-bin/carddisp.pl?gene=MMP1
PTPN2	Protein Tyrosine Phosphatase Non-Receptor Type 2	Protein Coding	P17706	59	GC18M040077	58.14	https://www.genecards.org/cgi-bin/carddisp.pl?gene=PTPN2
TMEM67	Transmembrane Protein 67	Protein Coding	Q5HYA8	51	GC08P093754	58.0932	https://www.genecards.org/cgi-bin/carddisp.pl?gene=TMEM67
FAH	Fumarylacetoacetate Hydrolase	Protein Coding	P16930	59	GC15P080152	57.9968	https://www.genecards.org/cgi-bin/carddisp.pl?gene=FAH
PAX6	Paired Box 6	Protein Coding	P26367	60	GC11M031784	57.9763	https://www.genecards.org/cgi-bin/carddisp.pl?gene=PAX6
PGM1	Phosphoglucomutase 1	Protein Coding	P36871	60	GC01P063593	57.96	https://www.genecards.org/cgi-bin/carddisp.pl?gene=PGM1
PRKAG2	Protein Kinase AMP-Activated Non-Catalytic Subunit Gamma 2	Protein Coding	Q9UGJ0	61	GC07M151556	57.9255	https://www.genecards.org/cgi-bin/carddisp.pl?gene=PRKAG2
TRIM32	Tripartite Motif Containing 32	Protein Coding	Q13049	55	GC09P116687	57.9013	https://www.genecards.org/cgi-bin/carddisp.pl?gene=TRIM32
EPO	Erythropoietin	Protein Coding	P01588	54	GC07P100720	57.882	https://www.genecards.org/cgi-bin/carddisp.pl?gene=EPO
GAD2	Glutamate Decarboxylase 2	Protein Coding	Q05329	57	GC10P026216	57.8408	https://www.genecards.org/cgi-bin/carddisp.pl?gene=GAD2
CDK4	Cyclin Dependent Kinase 4	Protein Coding	P11802	66	GC12M061024	57.7945	https://www.genecards.org/cgi-bin/carddisp.pl?gene=CDK4
TAB2	TGF-Beta Activated Kinase 1 (MAP3K7) Binding Protein 2	Protein Coding	Q9NYJ8	60	GC06P201182	57.6685	https://www.genecards.org/cgi-bin/carddisp.pl?gene=TAB2
PTPRC	Protein Tyrosine Phosphatase Receptor Type C	Protein Coding	P08575	64	GC01P198607	57.5833	https://www.genecards.org/cgi-bin/carddisp.pl?gene=PTPRC
SIGMAR1	Sigma Non-Opioid Intracellular Receptor 1	Protein Coding	Q99720	58	GC09M034634	57.5739	https://www.genecards.org/cgi-bin/carddisp.pl?gene=SIGMAR1
SMAD6	SMAD Family Member 6	Protein Coding	O43541	58	GC15P066702	57.5573	https://www.genecards.org/cgi-bin/carddisp.pl?gene=SMAD6
APOA4	Apolipoprotein A4	Protein Coding	P06727	55	GC11M116820	57.5286	https://www.genecards.org/cgi-bin/carddisp.pl?gene=APOA4
PLP1	Proteolipid Protein 1	Protein Coding	P60201	55	GC0XP104285	57.5214	https://www.genecards.org/cgi-bin/carddisp.pl?gene=PLP1
B3GALNT2	Beta-1,3-N-Acetylgalactosaminyltransferase 2	Protein Coding	Q8NCR0	51	GC01M235440	57.5186	https://www.genecards.org/cgi-bin/carddisp.pl?gene=B3GALNT2
SLC37A4	Solute Carrier Family 37 Member 4	Protein Coding	O43826	53	GC11M147044	57.49	https://www.genecards.org/cgi-bin/carddisp.pl?gene=SLC37A4
L2HGDH	L-2-Hydroxyglutarate Dehydrogenase	Protein Coding	Q9H9P8	51	GC14M050237	57.4644	https://www.genecards.org/cgi-bin/carddisp.pl?gene=L2HGDH
HMOX1	Heme Oxygenase 1	Protein Coding	P09601	64	GC22P035380	57.4402	https://www.genecards.org/cgi-bin/carddisp.pl?gene=HMOX1
LARGE1	LARGE Xylosyl- And Glucuronyltransferase 1	Protein Coding	O95461	52	GC22M090651	57.4087	https://www.genecards.org/cgi-bin/carddisp.pl?gene=LARGE1
SGCA	Sarcoglycan Alpha	Protein Coding	Q16586	54	GC17P050164	57.3857	https://www.genecards.org/cgi-bin/carddisp.pl?gene=SGCA
MYH9	Myosin Heavy Chain 9	Protein Coding	P35579	60	GC22M036281	57.3494	https://www.genecards.org/cgi-bin/carddisp.pl?gene=MYH9
ATP2A2	ATPase Sarcoplasmic/Endoplasmic Reticulum Ca2+ Transporting 2	Protein Coding	P16615	63	GC12P110280	57.3359	https://www.genecards.org/cgi-bin/carddisp.pl?gene=ATP2A2
CD40	CD40 Molecule	Protein Coding	P25942	63	GC20P046118	57.3108	https://www.genecards.org/cgi-bin/carddisp.pl?gene=CD40
PCNT	Pericentrin	Protein Coding	O95613	54	GC21P046324	57.2964	https://www.genecards.org/cgi-bin/carddisp.pl?gene=PCNT
CDK2	Cyclin Dependent Kinase 2	Protein Coding	P24941	63	GC12P055966	57.2924	https://www.genecards.org/cgi-bin/carddisp.pl?gene=CDK2
SCARB2	Scavenger Receptor Class B Member 2	Protein Coding	Q14108	57	GC04M076158	57.2783	https://www.genecards.org/cgi-bin/carddisp.pl?gene=SCARB2
IAPP	Islet Amyloid Polypeptide	Protein Coding	P10997	54	GC12P021354	57.2526	https://www.genecards.org/cgi-bin/carddisp.pl?gene=IAPP
CYP21A2	Cytochrome P450 Family 21 Subfamily A Member 2	Protein Coding	P08686	55	GC06P199550	57.2006	https://www.genecards.org/cgi-bin/carddisp.pl?gene=CYP21A2
VRK1	VRK Serine/Threonine Kinase 1	Protein Coding	Q99986	60	GC14P096797	57.1763	https://www.genecards.org/cgi-bin/carddisp.pl?gene=VRK1
SCNN1A	Sodium Channel Epithelial 1 Subunit Alpha	Protein Coding	P37088	61	GC12M006346	57.0247	https://www.genecards.org/cgi-bin/carddisp.pl?gene=SCNN1A
KIT	KIT Proto-Oncogene, Receptor Tyrosine Kinase	Protein Coding	P10721	66	GC04P054657	56.8928	https://www.genecards.org/cgi-bin/carddisp.pl?gene=KIT
AKR1B1	Aldo-Keto Reductase Family 1 Member B	Protein Coding	P15121	60	GC07M134442	56.8395	https://www.genecards.org/cgi-bin/carddisp.pl?gene=AKR1B1
MUC1	Mucin 1, Cell Surface Associated	Protein Coding	P15941	61	GC01M155185	56.8218	https://www.genecards.org/cgi-bin/carddisp.pl?gene=MUC1
LRP4	LDL Receptor Related Protein 4	Protein Coding	O75096	55	GC11M145846	56.8148	https://www.genecards.org/cgi-bin/carddisp.pl?gene=LRP4
SPTA1	Spectrin Alpha, Erythrocytic 1	Protein Coding	P02549	57	GC01M158610	56.768	https://www.genecards.org/cgi-bin/carddisp.pl?gene=SPTA1
ORAI1	ORAI Calcium Release-Activated Calcium Modulator 1	Protein Coding	Q96D31	57	GC12P141811	56.742	https://www.genecards.org/cgi-bin/carddisp.pl?gene=ORAI1
TFAP2A	Transcription Factor AP-2 Alpha	Protein Coding	P05549	60	GC06M010393	56.7222	https://www.genecards.org/cgi-bin/carddisp.pl?gene=TFAP2A
CLCNKB	Chloride Voltage-Gated Channel Kb	Protein Coding	P51801	54	GC01P092254	56.6407	https://www.genecards.org/cgi-bin/carddisp.pl?gene=CLCNKB
MMP13	Matrix Metallopeptidase 13	Protein Coding	P45452	62	GC11M102942	56.5979	https://www.genecards.org/cgi-bin/carddisp.pl?gene=MMP13
CREBBP	CREB Binding Lysine Acetyltransferase	Protein Coding	Q92793	67	GC16M055329	56.5845	https://www.genecards.org/cgi-bin/carddisp.pl?gene=CREBBP
BMP4	Bone Morphogenetic Protein 4	Protein Coding	P12644	61	GC14M053949	56.5331	https://www.genecards.org/cgi-bin/carddisp.pl?gene=BMP4
MIR29A	MicroRNA 29a	RNA Gene		31	GC07M130876	56.5257	https://www.genecards.org/cgi-bin/carddisp.pl?gene=MIR29A
BBS2	Bardet-Biedl Syndrome 2	Protein Coding	Q9BXC9	52	GC16M056488	56.4917	https://www.genecards.org/cgi-bin/carddisp.pl?gene=BBS2
CAV3	Caveolin 3	Protein Coding	P56539	56	GC03P008733	56.4881	https://www.genecards.org/cgi-bin/carddisp.pl?gene=CAV3
ALG1	ALG1 Chitobiosyldiphosphodolichol Beta-Mannosyltransferase	Protein Coding	Q9BT22	57	GC16P005033	56.3177	https://www.genecards.org/cgi-bin/carddisp.pl?gene=ALG1
HSD3B2	Hydroxy-Delta-5-Steroid Dehydrogenase, 3 Beta- And Steroid Delta-Isomerase 2	Protein Coding	P26439	57	GC01P119814	56.2708	https://www.genecards.org/cgi-bin/carddisp.pl?gene=HSD3B2
TPM2	Tropomyosin 2	Protein Coding	P07951	58	GC09M037262	56.1502	https://www.genecards.org/cgi-bin/carddisp.pl?gene=TPM2
PSMA3	Proteasome 20S Subunit Alpha 3	Protein Coding	P25788	57	GC14P058244	56.0551	https://www.genecards.org/cgi-bin/carddisp.pl?gene=PSMA3
COG2	Component Of Oligomeric Golgi Complex 2	Protein Coding	Q14746	50	GC01P230642	56.0494	https://www.genecards.org/cgi-bin/carddisp.pl?gene=COG2
P4HB	Prolyl 4-Hydroxylase Subunit Beta	Protein Coding	P07237	62	GC17M081843	56.0357	https://www.genecards.org/cgi-bin/carddisp.pl?gene=P4HB
MAPK3	Mitogen-Activated Protein Kinase 3	Protein Coding	P27361	61	GC16M056375	56.0157	https://www.genecards.org/cgi-bin/carddisp.pl?gene=MAPK3
CYP2C9	Cytochrome P450 Family 2 Subfamily C Member 9	Protein Coding	P11712	60	GC10P094938	55.9969	https://www.genecards.org/cgi-bin/carddisp.pl?gene=CYP2C9
ELAC2	ElaC Ribonuclease Z 2	Protein Coding	Q9BQ52	53	GC17M012991	55.9603	https://www.genecards.org/cgi-bin/carddisp.pl?gene=ELAC2
DICER1	Dicer 1, Ribonuclease III	Protein Coding	Q9UPY3	61	GC14M095086	55.9583	https://www.genecards.org/cgi-bin/carddisp.pl?gene=DICER1
ABCG2	ATP Binding Cassette Subfamily G Member 2 (JR Blood Group)	Protein Coding	Q9UNQ0	62	GC04M088090	55.8687	https://www.genecards.org/cgi-bin/carddisp.pl?gene=ABCG2
TRIM2	Tripartite Motif Containing 2	Protein Coding	Q9C040	52	GC04P153152	55.7928	https://www.genecards.org/cgi-bin/carddisp.pl?gene=TRIM2
CYBA	Cytochrome B-245 Alpha Chain	Protein Coding	P13498	58	GC16M088643	55.7812	https://www.genecards.org/cgi-bin/carddisp.pl?gene=CYBA
MMP14	Matrix Metallopeptidase 14	Protein Coding	P50281	63	GC14P065380	55.7692	https://www.genecards.org/cgi-bin/carddisp.pl?gene=MMP14
GLI3	GLI Family Zinc Finger 3	Protein Coding	P10071	62	GC07M041960	55.643	https://www.genecards.org/cgi-bin/carddisp.pl?gene=GLI3
BDNF-AS	BDNF Antisense RNA	RNA Gene		30	GC11P027466	55.6091	https://www.genecards.org/cgi-bin/carddisp.pl?gene=BDNF-AS
IGFBP2	Insulin Like Growth Factor Binding Protein 2	Protein Coding	P18065	57	GC02P216632	55.5458	https://www.genecards.org/cgi-bin/carddisp.pl?gene=IGFBP2
CRTAP	Cartilage Associated Protein	Protein Coding	O75718	54	GC03P033113	55.5441	https://www.genecards.org/cgi-bin/carddisp.pl?gene=CRTAP
PMS2	PMS1 Homolog 2, Mismatch Repair System Component	Protein Coding	P54278	61	GC07M005982	55.4121	https://www.genecards.org/cgi-bin/carddisp.pl?gene=PMS2
RUNX2	RUNX Family Transcription Factor 2	Protein Coding	Q13950	60	GC06P199724	55.3951	https://www.genecards.org/cgi-bin/carddisp.pl?gene=RUNX2
PLAGL1	PLAG1 Like Zinc Finger 1	Protein Coding	Q9UM63	55	GC06M143940	55.3328	https://www.genecards.org/cgi-bin/carddisp.pl?gene=PLAGL1
KRT5	Keratin 5	Protein Coding	P13647	57	GC12M052514	55.3194	https://www.genecards.org/cgi-bin/carddisp.pl?gene=KRT5
NOTCH1	Notch Receptor 1	Protein Coding	P46531	66	GC09M140475	55.2978	https://www.genecards.org/cgi-bin/carddisp.pl?gene=NOTCH1
NPPA	Natriuretic Peptide A	Protein Coding	P01160	56	GC01M040726	55.2631	https://www.genecards.org/cgi-bin/carddisp.pl?gene=NPPA
SLC4A1	Solute Carrier Family 4 Member 1 (Diego Blood Group)	Protein Coding	P02730	60	GC17M104839	55.214	https://www.genecards.org/cgi-bin/carddisp.pl?gene=SLC4A1
RBPJL	Recombination Signal Binding Protein For Immunoglobulin Kappa J Region Like	Protein Coding	Q9UBG7	47	GC20P045306	55.187	https://www.genecards.org/cgi-bin/carddisp.pl?gene=RBPJL
KIF7	Kinesin Family Member 7	Protein Coding	Q2M1P5	50	GC15M089608	55.1818	https://www.genecards.org/cgi-bin/carddisp.pl?gene=KIF7
JAK1	Janus Kinase 1	Protein Coding	P23458	66	GC01M064833	55.1758	https://www.genecards.org/cgi-bin/carddisp.pl?gene=JAK1
PNLIP	Pancreatic Lipase	Protein Coding	P16233	59	GC10P116545	55.1299	https://www.genecards.org/cgi-bin/carddisp.pl?gene=PNLIP
TAT	Tyrosine Aminotransferase	Protein Coding	P17735	57	GC16M071565	55.1167	https://www.genecards.org/cgi-bin/carddisp.pl?gene=TAT
ABCB1	ATP Binding Cassette Subfamily B Member 1	Protein Coding	P08183	64	GC07M087504	55.1074	https://www.genecards.org/cgi-bin/carddisp.pl?gene=ABCB1
CHST14	Carbohydrate Sulfotransferase 14	Protein Coding	Q8NCH0	52	GC15P040470	55.0866	https://www.genecards.org/cgi-bin/carddisp.pl?gene=CHST14
PTGS1	Prostaglandin-Endoperoxide Synthase 1	Protein Coding	P23219	61	GC09P122370	55.0742	https://www.genecards.org/cgi-bin/carddisp.pl?gene=PTGS1
TARDBP	TAR DNA Binding Protein	Protein Coding	Q13148	59	GC01P091901	55.0523	https://www.genecards.org/cgi-bin/carddisp.pl?gene=TARDBP
ZMPSTE24	Zinc Metallopeptidase STE24	Protein Coding	O75844	51	GC01P040258	54.9804	https://www.genecards.org/cgi-bin/carddisp.pl?gene=ZMPSTE24
GLI2	GLI Family Zinc Finger 2	Protein Coding	P10070	60	GC02P120735	54.9799	https://www.genecards.org/cgi-bin/carddisp.pl?gene=GLI2
PLCE1	Phospholipase C Epsilon 1	Protein Coding	Q9P212	56	GC10P093993	54.9785	https://www.genecards.org/cgi-bin/carddisp.pl?gene=PLCE1
SELP	Selectin P	Protein Coding	P16109	58	GC01M169589	54.8883	https://www.genecards.org/cgi-bin/carddisp.pl?gene=SELP
FOXA2	Forkhead Box A2	Protein Coding	Q9Y261	60	GC20M022581	54.8663	https://www.genecards.org/cgi-bin/carddisp.pl?gene=FOXA2
LEPR	Leptin Receptor	Protein Coding	P48357	63	GC01P095923	54.8244	https://www.genecards.org/cgi-bin/carddisp.pl?gene=LEPR
PARP1	Poly(ADP-Ribose) Polymerase 1	Protein Coding	P09874	64	GC01M226360	54.7148	https://www.genecards.org/cgi-bin/carddisp.pl?gene=PARP1
HLA-A	Major Histocompatibility Complex, Class I, A	Protein Coding	P04439	59	GC06P199489	54.67	https://www.genecards.org/cgi-bin/carddisp.pl?gene=HLA-A
ALG6	ALG6 Alpha-1,3-Glucosyltransferase	Protein Coding	Q9Y672	53	GC01P063367	54.6455	https://www.genecards.org/cgi-bin/carddisp.pl?gene=ALG6
MDM2	MDM2 Proto-Oncogene	Protein Coding	Q00987	66	GC12P068808	54.6442	https://www.genecards.org/cgi-bin/carddisp.pl?gene=MDM2
ERBB3	Erb-B2 Receptor Tyrosine Kinase 3	Protein Coding	P21860	67	GC12P087018	54.6309	https://www.genecards.org/cgi-bin/carddisp.pl?gene=ERBB3
GNA11	G Protein Subunit Alpha 11	Protein Coding	P29992	60	GC19P003094	54.597	https://www.genecards.org/cgi-bin/carddisp.pl?gene=GNA11
ANK1	Ankyrin 1	Protein Coding	P16157	57	GC08M041653	54.597	https://www.genecards.org/cgi-bin/carddisp.pl?gene=ANK1
LCAT	Lecithin-Cholesterol Acyltransferase	Protein Coding	P04180	59	GC16M067939	54.5182	https://www.genecards.org/cgi-bin/carddisp.pl?gene=LCAT
CFH	Complement Factor H	Protein Coding	P08603	59	GC01P196621	54.433	https://www.genecards.org/cgi-bin/carddisp.pl?gene=CFH
SGCG	Sarcoglycan Gamma	Protein Coding	Q13326	55	GC13P023160	54.3556	https://www.genecards.org/cgi-bin/carddisp.pl?gene=SGCG
SMN1	Survival Of Motor Neuron 1, Telomeric	Protein Coding	Q16637	54	GC05P070924	54.3489	https://www.genecards.org/cgi-bin/carddisp.pl?gene=SMN1
PARK7	Parkinsonism Associated Deglycase	Protein Coding	Q99497	60	GC01P091705	54.3434	https://www.genecards.org/cgi-bin/carddisp.pl?gene=PARK7
FGD4	FYVE, RhoGEF And PH Domain Containing 4	Protein Coding	Q96M96	55	GC12P086304	54.3191	https://www.genecards.org/cgi-bin/carddisp.pl?gene=FGD4
ELP1	Elongator Acetyltransferase Complex Subunit 1	Protein Coding	O95163	55	GC09M133890	54.3059	https://www.genecards.org/cgi-bin/carddisp.pl?gene=ELP1
TNFRSF1B	TNF Receptor Superfamily Member 1B	Protein Coding	P20333	61	GC01P092008	54.1742	https://www.genecards.org/cgi-bin/carddisp.pl?gene=TNFRSF1B
HOTAIR	HOX Transcript Antisense RNA	RNA Gene		30	GC12M053962	54.1618	https://www.genecards.org/cgi-bin/carddisp.pl?gene=HOTAIR
SELENON	Selenoprotein N	Protein Coding	Q9NZV5	50	GC01P025800	54.1392	https://www.genecards.org/cgi-bin/carddisp.pl?gene=SELENON
UGT1A9	UDP Glucuronosyltransferase Family 1 Member A9	Protein Coding	O60656	58	GC02P233671	54.1113	https://www.genecards.org/cgi-bin/carddisp.pl?gene=UGT1A9
CASC2	Cancer Susceptibility 2	RNA Gene	Q8IU53	33	GC10P118046	54.0198	https://www.genecards.org/cgi-bin/carddisp.pl?gene=CASC2
SLC52A2	Solute Carrier Family 52 Member 2	Protein Coding	Q9HAB3	51	GC08P144333	53.9664	https://www.genecards.org/cgi-bin/carddisp.pl?gene=SLC52A2
COL7A1	Collagen Type VII Alpha 1 Chain	Protein Coding	Q02388	56	GC03M048564	53.9344	https://www.genecards.org/cgi-bin/carddisp.pl?gene=COL7A1
LZTR1	Leucine Zipper Like Post Translational Regulator 1	Protein Coding	Q8N653	54	GC22P102074	53.8991	https://www.genecards.org/cgi-bin/carddisp.pl?gene=LZTR1
KIF1C	Kinesin Family Member 1C	Protein Coding	O43896	53	GC17P174415	53.8974	https://www.genecards.org/cgi-bin/carddisp.pl?gene=KIF1C
CBS	Cystathionine Beta-Synthase	Protein Coding	P35520	63	GC21M043053	53.8863	https://www.genecards.org/cgi-bin/carddisp.pl?gene=CBS
ROR2	Receptor Tyrosine Kinase Like Orphan Receptor 2	Protein Coding	Q01974	60	GC09M133494	53.8709	https://www.genecards.org/cgi-bin/carddisp.pl?gene=ROR2
ALDH4A1	Aldehyde Dehydrogenase 4 Family Member A1	Protein Coding	P30038	56	GC01M018871	53.8343	https://www.genecards.org/cgi-bin/carddisp.pl?gene=ALDH4A1
CD274	CD274 Molecule	Protein Coding	Q9NZQ7	58	GC09P005450	53.7877	https://www.genecards.org/cgi-bin/carddisp.pl?gene=CD274
HARS1	Histidyl-TRNA Synthetase 1	Protein Coding	P12081	55	GC05M140673	53.7666	https://www.genecards.org/cgi-bin/carddisp.pl?gene=HARS1
CDH1	Cadherin 1	Protein Coding	P12830	61	GC16P068737	53.7538	https://www.genecards.org/cgi-bin/carddisp.pl?gene=CDH1
SOX9	SRY-Box Transcription Factor 9	Protein Coding	P48436	57	GC17P072121	53.7212	https://www.genecards.org/cgi-bin/carddisp.pl?gene=SOX9
MOCS1	Molybdenum Cofactor Synthesis 1	Protein Coding	Q9NZB8	53	GC06M039899	53.7075	https://www.genecards.org/cgi-bin/carddisp.pl?gene=MOCS1
PCSK1	Proprotein Convertase Subtilisin/Kexin Type 1	Protein Coding	P29120	61	GC05M096391	53.6932	https://www.genecards.org/cgi-bin/carddisp.pl?gene=PCSK1
AMN	Amnion Associated Transmembrane Protein	Protein Coding	Q9BXJ7	52	GC14P102922	53.6727	https://www.genecards.org/cgi-bin/carddisp.pl?gene=AMN
SPTB	Spectrin Beta, Erythrocytic	Protein Coding	P11277	53	GC14M064746	53.6057	https://www.genecards.org/cgi-bin/carddisp.pl?gene=SPTB
LRPPRC	Leucine Rich Pentatricopeptide Repeat Containing	Protein Coding	P42704	54	GC02M043886	53.5834	https://www.genecards.org/cgi-bin/carddisp.pl?gene=LRPPRC
SLC19A3	Solute Carrier Family 19 Member 3	Protein Coding	Q9BZV2	58	GC02M227685	53.5806	https://www.genecards.org/cgi-bin/carddisp.pl?gene=SLC19A3
OPA3	Outer Mitochondrial Membrane Lipid Metabolism Regulator OPA3	Protein Coding	Q9H6K4	50	GC19M045527	53.551	https://www.genecards.org/cgi-bin/carddisp.pl?gene=OPA3
EDN1	Endothelin 1	Protein Coding	P05305	61	GC06P020988	53.5014	https://www.genecards.org/cgi-bin/carddisp.pl?gene=EDN1
ALG12	ALG12 Alpha-1,6-Mannosyltransferase	Protein Coding	Q9BV10	49	GC22M049859	53.413	https://www.genecards.org/cgi-bin/carddisp.pl?gene=ALG12
B4GALT7	Beta-1,4-Galactosyltransferase 7	Protein Coding	Q9UBV7	52	GC05P177600	53.3809	https://www.genecards.org/cgi-bin/carddisp.pl?gene=B4GALT7
MMAA	Metabolism Of Cobalamin Associated A	Protein Coding	Q8IVH4	51	GC04P145669	53.3666	https://www.genecards.org/cgi-bin/carddisp.pl?gene=MMAA
STAT5B	Signal Transducer And Activator Of Transcription 5B	Protein Coding	P51692	62	GC17M042199	53.3649	https://www.genecards.org/cgi-bin/carddisp.pl?gene=STAT5B
LAMA2	Laminin Subunit Alpha 2	Protein Coding	P24043	57	GC06P200692	53.3298	https://www.genecards.org/cgi-bin/carddisp.pl?gene=LAMA2
INPPL1	Inositol Polyphosphate Phosphatase Like 1	Protein Coding	O15357	60	GC11P072223	53.2993	https://www.genecards.org/cgi-bin/carddisp.pl?gene=INPPL1
OCRL	OCRL Inositol Polyphosphate-5-Phosphatase	Protein Coding	Q01968	57	GC0XP129539	53.2355	https://www.genecards.org/cgi-bin/carddisp.pl?gene=OCRL
MCCC2	Methylcrotonyl-CoA Carboxylase Subunit 2	Protein Coding	Q9HCC0	55	GC05P084667	53.2315	https://www.genecards.org/cgi-bin/carddisp.pl?gene=MCCC2
FLT1	Fms Related Receptor Tyrosine Kinase 1	Protein Coding	P17948	64	GC13M028300	53.2144	https://www.genecards.org/cgi-bin/carddisp.pl?gene=FLT1
HGSNAT	Heparan-Alpha-Glucosaminide N-Acetyltransferase	Protein Coding	Q68CP4	48	GC08P043140	53.1815	https://www.genecards.org/cgi-bin/carddisp.pl?gene=HGSNAT
DSP	Desmoplakin	Protein Coding	P15924	62	GC06P007541	53.1381	https://www.genecards.org/cgi-bin/carddisp.pl?gene=DSP
PITX2	Paired Like Homeodomain 2	Protein Coding	Q99697	59	GC04M110617	53.1249	https://www.genecards.org/cgi-bin/carddisp.pl?gene=PITX2
RBCK1	RANBP2-Type And C3HC4-Type Zinc Finger Containing 1	Protein Coding	Q9BYM8	53	GC20P000407	53.071	https://www.genecards.org/cgi-bin/carddisp.pl?gene=RBCK1
GDF5	Growth Differentiation Factor 5	Protein Coding	P43026	57	GC20M035433	53.0592	https://www.genecards.org/cgi-bin/carddisp.pl?gene=GDF5
SLC34A1	Solute Carrier Family 34 Member 1	Protein Coding	Q06495	56	GC05P192151	53.0469	https://www.genecards.org/cgi-bin/carddisp.pl?gene=SLC34A1
TMEM216	Transmembrane Protein 216	Protein Coding	Q9P0N5	46	GC11P129525	53.0384	https://www.genecards.org/cgi-bin/carddisp.pl?gene=TMEM216
RPE65	Retinoid Isomerohydrolase RPE65	Protein Coding	Q16518	57	GC01M068428	52.9832	https://www.genecards.org/cgi-bin/carddisp.pl?gene=RPE65
FREM2	FRAS1 Related Extracellular Matrix 2	Protein Coding	Q5SZK8	48	GC13P038687	52.9625	https://www.genecards.org/cgi-bin/carddisp.pl?gene=FREM2
RAB7A	RAB7A, Member RAS Oncogene Family	Protein Coding	P51149	61	GC03P145145	52.9027	https://www.genecards.org/cgi-bin/carddisp.pl?gene=RAB7A
AP3B1	Adaptor Related Protein Complex 3 Subunit Beta 1	Protein Coding	O00203	56	GC05M082856	52.8788	https://www.genecards.org/cgi-bin/carddisp.pl?gene=AP3B1
ALDH18A1	Aldehyde Dehydrogenase 18 Family Member A1	Protein Coding	P54886	58	GC10M095605	52.8728	https://www.genecards.org/cgi-bin/carddisp.pl?gene=ALDH18A1
TIMP1	TIMP Metallopeptidase Inhibitor 1	Protein Coding	P01033	57	GC0XP062405	52.8604	https://www.genecards.org/cgi-bin/carddisp.pl?gene=TIMP1
HOGA1	4-Hydroxy-2-Oxoglutarate Aldolase 1	Protein Coding	Q86XE5	52	GC10P134608	52.8356	https://www.genecards.org/cgi-bin/carddisp.pl?gene=HOGA1
APC	APC Regulator Of Wnt Signaling Pathway	Protein Coding	P25054	61	GC05P112707	52.8077	https://www.genecards.org/cgi-bin/carddisp.pl?gene=APC
SOX2	SRY-Box Transcription Factor 2	Protein Coding	P48431	58	GC03P181711	52.7958	https://www.genecards.org/cgi-bin/carddisp.pl?gene=SOX2
IKBKB	Inhibitor Of Nuclear Factor Kappa B Kinase Subunit Beta	Protein Coding	O14920	66	GC08P042271	52.7922	https://www.genecards.org/cgi-bin/carddisp.pl?gene=IKBKB
ABCC6	ATP Binding Cassette Subfamily C Member 6	Protein Coding	O95255	60	GC16M055712	52.7717	https://www.genecards.org/cgi-bin/carddisp.pl?gene=ABCC6
CYP2C19	Cytochrome P450 Family 2 Subfamily C Member 19	Protein Coding	P33261	58	GC10P094762	52.7463	https://www.genecards.org/cgi-bin/carddisp.pl?gene=CYP2C19
BEST1	Bestrophin 1	Protein Coding	O76090	55	GC11P061949	52.7442	https://www.genecards.org/cgi-bin/carddisp.pl?gene=BEST1
LRP5	LDL Receptor Related Protein 5	Protein Coding	O75197	62	GC11P068298	52.6868	https://www.genecards.org/cgi-bin/carddisp.pl?gene=LRP5
MAPK14	Mitogen-Activated Protein Kinase 14	Protein Coding	Q16539	64	GC06P199648	52.6751	https://www.genecards.org/cgi-bin/carddisp.pl?gene=MAPK14
PEX7	Peroxisomal Biogenesis Factor 7	Protein Coding	O00628	55	GC06P136822	52.6655	https://www.genecards.org/cgi-bin/carddisp.pl?gene=PEX7
TMPRSS2	Transmembrane Serine Protease 2	Protein Coding	O15393	60	GC21M041464	52.6299	https://www.genecards.org/cgi-bin/carddisp.pl?gene=TMPRSS2
PAX2	Paired Box 2	Protein Coding	Q02962	58	GC10P100735	52.6121	https://www.genecards.org/cgi-bin/carddisp.pl?gene=PAX2
EGF	Epidermal Growth Factor	Protein Coding	P01133	64	GC04P109912	52.6052	https://www.genecards.org/cgi-bin/carddisp.pl?gene=EGF
LRRK2	Leucine Rich Repeat Kinase 2	Protein Coding	Q5S007	61	GC12P040196	52.5425	https://www.genecards.org/cgi-bin/carddisp.pl?gene=LRRK2
PSEN2	Presenilin 2	Protein Coding	P49810	63	GC01P226870	52.3201	https://www.genecards.org/cgi-bin/carddisp.pl?gene=PSEN2
IGFBP3	Insulin Like Growth Factor Binding Protein 3	Protein Coding	P17936	59	GC07M045912	52.2746	https://www.genecards.org/cgi-bin/carddisp.pl?gene=IGFBP3
NTRK1	Neurotrophic Receptor Tyrosine Kinase 1	Protein Coding	P04629	62	GC01P156815	52.2346	https://www.genecards.org/cgi-bin/carddisp.pl?gene=NTRK1
CXCR4	C-X-C Motif Chemokine Receptor 4	Protein Coding	P61073	65	GC02M136114	52.1833	https://www.genecards.org/cgi-bin/carddisp.pl?gene=CXCR4
UGT1A8	UDP Glucuronosyltransferase Family 1 Member A8	Protein Coding	Q9HAW9	52	GC02P235923	52.1697	https://www.genecards.org/cgi-bin/carddisp.pl?gene=UGT1A8
C3	Complement C3	Protein Coding	P01024	61	GC19M006677	52.162	https://www.genecards.org/cgi-bin/carddisp.pl?gene=C3
SLCO1B1	Solute Carrier Organic Anion Transporter Family Member 1B1	Protein Coding	Q9Y6L6	59	GC12P086069	52.1596	https://www.genecards.org/cgi-bin/carddisp.pl?gene=SLCO1B1
PSAP	Prosaposin	Protein Coding	P07602	60	GC10M071816	52.1182	https://www.genecards.org/cgi-bin/carddisp.pl?gene=PSAP
GSK3B	Glycogen Synthase Kinase 3 Beta	Protein Coding	P49841	64	GC03M119821	52.0611	https://www.genecards.org/cgi-bin/carddisp.pl?gene=GSK3B
SCN2A	Sodium Voltage-Gated Channel Alpha Subunit 2	Protein Coding	Q99250	60	GC02P165194	52.034	https://www.genecards.org/cgi-bin/carddisp.pl?gene=SCN2A
MAP2K2	Mitogen-Activated Protein Kinase Kinase 2	Protein Coding	P36507	67	GC19M004090	52.0251	https://www.genecards.org/cgi-bin/carddisp.pl?gene=MAP2K2
ACVR1	Activin A Receptor Type 1	Protein Coding	Q04771	63	GC02M157736	51.9945	https://www.genecards.org/cgi-bin/carddisp.pl?gene=ACVR1
TNFRSF11B	TNF Receptor Superfamily Member 11b	Protein Coding	O00300	59	GC08M118923	51.9391	https://www.genecards.org/cgi-bin/carddisp.pl?gene=TNFRSF11B
KRT14	Keratin 14	Protein Coding	P02533	58	GC17M041582	51.9282	https://www.genecards.org/cgi-bin/carddisp.pl?gene=KRT14
CNBP	CCHC-Type Zinc Finger Nucleic Acid Binding Protein	Protein Coding	P62633	54	GC03M129167	51.9269	https://www.genecards.org/cgi-bin/carddisp.pl?gene=CNBP
SHC1	SHC Adaptor Protein 1	Protein Coding	P29353	57	GC01M154962	51.9051	https://www.genecards.org/cgi-bin/carddisp.pl?gene=SHC1
UGT1A6	UDP Glucuronosyltransferase Family 1 Member A6	Protein Coding	P19224	57	GC02P233691	51.884	https://www.genecards.org/cgi-bin/carddisp.pl?gene=UGT1A6
BDNF	Brain Derived Neurotrophic Factor	Protein Coding	P23560	62	GC11M027654	51.8753	https://www.genecards.org/cgi-bin/carddisp.pl?gene=BDNF
TNFRSF11A	TNF Receptor Superfamily Member 11a	Protein Coding	Q9Y6Q6	58	GC18P062325	51.8635	https://www.genecards.org/cgi-bin/carddisp.pl?gene=TNFRSF11A
PIEZO2	Piezo Type Mechanosensitive Ion Channel Component 2	Protein Coding	Q9H5I5	48	GC18M010741	51.7851	https://www.genecards.org/cgi-bin/carddisp.pl?gene=PIEZO2
HSD11B1	Hydroxysteroid 11-Beta Dehydrogenase 1	Protein Coding	P28845	63	GC01P209686	51.7427	https://www.genecards.org/cgi-bin/carddisp.pl?gene=HSD11B1
MOGS	Mannosyl-Oligosaccharide Glucosidase	Protein Coding	Q13724	56	GC02M074461	51.7013	https://www.genecards.org/cgi-bin/carddisp.pl?gene=MOGS
JUN	Jun Proto-Oncogene, AP-1 Transcription Factor Subunit	Protein Coding	P05412	63	GC01M058780	51.6545	https://www.genecards.org/cgi-bin/carddisp.pl?gene=JUN
AHSG	Alpha 2-HS Glycoprotein	Protein Coding	P02765	57	GC03P186612	51.6494	https://www.genecards.org/cgi-bin/carddisp.pl?gene=AHSG
HSD17B4	Hydroxysteroid 17-Beta Dehydrogenase 4	Protein Coding	P51659	59	GC05P119452	51.6421	https://www.genecards.org/cgi-bin/carddisp.pl?gene=HSD17B4
RIF1	Replication Timing Regulatory Factor 1	Protein Coding	Q5UIP0	48	GC02P151409	51.6307	https://www.genecards.org/cgi-bin/carddisp.pl?gene=RIF1
MAPT	Microtubule Associated Protein Tau	Protein Coding	P10636	62	GC17P045894	51.6266	https://www.genecards.org/cgi-bin/carddisp.pl?gene=MAPT
BSND	Barttin CLCNK Type Accessory Subunit Beta	Protein Coding	Q8WZ55	52	GC01P054998	51.6089	https://www.genecards.org/cgi-bin/carddisp.pl?gene=BSND
RBP4	Retinol Binding Protein 4	Protein Coding	P02753	57	GC10M093591	51.599	https://www.genecards.org/cgi-bin/carddisp.pl?gene=RBP4
FKBP14	FKBP Prolyl Isomerase 14	Protein Coding	Q9NWM8	52	GC07M031865	51.5497	https://www.genecards.org/cgi-bin/carddisp.pl?gene=FKBP14
ALPL	Alkaline Phosphatase, Biomineralization Associated	Protein Coding	P05186	63	GC01P021508	51.5317	https://www.genecards.org/cgi-bin/carddisp.pl?gene=ALPL
MAPK8	Mitogen-Activated Protein Kinase 8	Protein Coding	P45983	63	GC10P048306	51.5308	https://www.genecards.org/cgi-bin/carddisp.pl?gene=MAPK8
DES	Desmin	Protein Coding	P17661	60	GC02P220864	51.504	https://www.genecards.org/cgi-bin/carddisp.pl?gene=DES
MIR21	MicroRNA 21	RNA Gene		33	GC17P059841	51.498	https://www.genecards.org/cgi-bin/carddisp.pl?gene=MIR21
IL18	Interleukin 18	Protein Coding	Q14116	56	GC11M112143	51.4927	https://www.genecards.org/cgi-bin/carddisp.pl?gene=IL18
ACADSB	Acyl-CoA Dehydrogenase Short/Branched Chain	Protein Coding	P45954	57	GC10P123008	51.4812	https://www.genecards.org/cgi-bin/carddisp.pl?gene=ACADSB
SURF1	SURF1 Cytochrome C Oxidase Assembly Factor	Protein Coding	Q15526	55	GC09M133351	51.4726	https://www.genecards.org/cgi-bin/carddisp.pl?gene=SURF1
ABCC2	ATP Binding Cassette Subfamily C Member 2	Protein Coding	Q92887	60	GC10P099782	51.4341	https://www.genecards.org/cgi-bin/carddisp.pl?gene=ABCC2
GNPAT	Glyceronephosphate O-Acyltransferase	Protein Coding	O15228	57	GC01P231241	51.4256	https://www.genecards.org/cgi-bin/carddisp.pl?gene=GNPAT
CYP2D6	Cytochrome P450 Family 2 Subfamily D Member 6 (Gene/Pseudogene)	Protein Coding	P10635	60	GC22M090768	51.4023	https://www.genecards.org/cgi-bin/carddisp.pl?gene=CYP2D6
PTCH1	Patched 1	Protein Coding	Q13635	64	GC09M095442	51.3781	https://www.genecards.org/cgi-bin/carddisp.pl?gene=PTCH1
KCND3	Potassium Voltage-Gated Channel Subfamily D Member 3	Protein Coding	Q9UK17	59	GC01M111770	51.351	https://www.genecards.org/cgi-bin/carddisp.pl?gene=KCND3
GHRL	Ghrelin And Obestatin Prepropeptide	Protein Coding	Q9UBU3	54	GC03M010285	51.3125	https://www.genecards.org/cgi-bin/carddisp.pl?gene=GHRL
PRKCA	Protein Kinase C Alpha	Protein Coding	P17252	64	GC17P066302	51.2977	https://www.genecards.org/cgi-bin/carddisp.pl?gene=PRKCA
CR2	Complement C3d Receptor 2	Protein Coding	P20023	58	GC01P207454	51.2767	https://www.genecards.org/cgi-bin/carddisp.pl?gene=CR2
BIN1	Bridging Integrator 1	Protein Coding	O00499	59	GC02M127048	51.2718	https://www.genecards.org/cgi-bin/carddisp.pl?gene=BIN1
POLD1	DNA Polymerase Delta 1, Catalytic Subunit	Protein Coding	P28340	59	GC19P172047	51.2608	https://www.genecards.org/cgi-bin/carddisp.pl?gene=POLD1
GAD1	Glutamate Decarboxylase 1	Protein Coding	Q99259	62	GC02P170813	51.2549	https://www.genecards.org/cgi-bin/carddisp.pl?gene=GAD1
PIGA	Phosphatidylinositol Glycan Anchor Biosynthesis Class A	Protein Coding	P37287	55	GC0XM015319	51.1981	https://www.genecards.org/cgi-bin/carddisp.pl?gene=PIGA
PEX6	Peroxisomal Biogenesis Factor 6	Protein Coding	Q13608	52	GC06M115172	51.1645	https://www.genecards.org/cgi-bin/carddisp.pl?gene=PEX6
SUMO4	Small Ubiquitin Like Modifier 4	Protein Coding	Q6EEV6	48	GC06P201192	51.1473	https://www.genecards.org/cgi-bin/carddisp.pl?gene=SUMO4
GLUD1	Glutamate Dehydrogenase 1	Protein Coding	P00367	63	GC10M087050	51.1157	https://www.genecards.org/cgi-bin/carddisp.pl?gene=GLUD1
ANGPT2	Angiopoietin 2	Protein Coding	O15123	60	GC08M006499	51.1056	https://www.genecards.org/cgi-bin/carddisp.pl?gene=ANGPT2
LITAF	Lipopolysaccharide Induced TNF Factor	Protein Coding	Q99732	54	GC16M055542	51.1052	https://www.genecards.org/cgi-bin/carddisp.pl?gene=LITAF
HSPA5	Heat Shock Protein Family A (Hsp70) Member 5	Protein Coding	P11021	61	GC09M125234	51.0864	https://www.genecards.org/cgi-bin/carddisp.pl?gene=HSPA5
PTPN6	Protein Tyrosine Phosphatase Non-Receptor Type 6	Protein Coding	P29350	63	GC12P085735	51.071	https://www.genecards.org/cgi-bin/carddisp.pl?gene=PTPN6
CARD14	Caspase Recruitment Domain Family Member 14	Protein Coding	Q9BXL6	54	GC17P176521	51.0603	https://www.genecards.org/cgi-bin/carddisp.pl?gene=CARD14
PCBD1	Pterin-4 Alpha-Carbinolamine Dehydratase 1	Protein Coding	P61457	57	GC10M070882	51.0312	https://www.genecards.org/cgi-bin/carddisp.pl?gene=PCBD1
COL4A5	Collagen Type IV Alpha 5 Chain	Protein Coding	P29400	56	GC0XP108439	51.0299	https://www.genecards.org/cgi-bin/carddisp.pl?gene=COL4A5
SREBF1	Sterol Regulatory Element Binding Transcription Factor 1	Protein Coding	P36956	61	GC17M017810	51.0297	https://www.genecards.org/cgi-bin/carddisp.pl?gene=SREBF1
SLC2A9	Solute Carrier Family 2 Member 9	Protein Coding	Q9NRM0	57	GC04M009772	51.0216	https://www.genecards.org/cgi-bin/carddisp.pl?gene=SLC2A9
TYK2	Tyrosine Kinase 2	Protein Coding	P29597	66	GC19M010350	50.977	https://www.genecards.org/cgi-bin/carddisp.pl?gene=TYK2
CYP1A2	Cytochrome P450 Family 1 Subfamily A Member 2	Protein Coding	P05177	58	GC15P074748	50.9445	https://www.genecards.org/cgi-bin/carddisp.pl?gene=CYP1A2
GSN	Gelsolin	Protein Coding	P06396	60	GC09P121201	50.9366	https://www.genecards.org/cgi-bin/carddisp.pl?gene=GSN
PPARA	Peroxisome Proliferator Activated Receptor Alpha	Protein Coding	Q07869	57	GC22P102866	50.9289	https://www.genecards.org/cgi-bin/carddisp.pl?gene=PPARA
PSEN1	Presenilin 1	Protein Coding	P49768	66	GC14P073136	50.9162	https://www.genecards.org/cgi-bin/carddisp.pl?gene=PSEN1
FOXO1	Forkhead Box O1	Protein Coding	Q12778	64	GC13M040555	50.8957	https://www.genecards.org/cgi-bin/carddisp.pl?gene=FOXO1
MOGAT2	Monoacylglycerol O-Acyltransferase 2	Protein Coding	Q3SYC2	45	GC11P075717	50.88	https://www.genecards.org/cgi-bin/carddisp.pl?gene=MOGAT2
PON2	Paraoxonase 2	Protein Coding	Q15165	57	GC07M095404	50.8134	https://www.genecards.org/cgi-bin/carddisp.pl?gene=PON2
PLAUR	Plasminogen Activator, Urokinase Receptor	Protein Coding	Q03405	57	GC19M043646	50.6745	https://www.genecards.org/cgi-bin/carddisp.pl?gene=PLAUR
GNE	Glucosamine (UDP-N-Acetyl)-2-Epimerase/N-Acetylmannosamine Kinase	Protein Coding	Q9Y223	54	GC09M036214	50.647	https://www.genecards.org/cgi-bin/carddisp.pl?gene=GNE
SHH	Sonic Hedgehog Signaling Molecule	Protein Coding	Q15465	63	GC07M155799	50.5935	https://www.genecards.org/cgi-bin/carddisp.pl?gene=SHH
ATP6V1B1	ATPase H+ Transporting V1 Subunit B1	Protein Coding	P15313	55	GC02P070935	50.5848	https://www.genecards.org/cgi-bin/carddisp.pl?gene=ATP6V1B1
UGT1A4	UDP Glucuronosyltransferase Family 1 Member A4	Protein Coding	P22310	57	GC02P233718	50.5801	https://www.genecards.org/cgi-bin/carddisp.pl?gene=UGT1A4
SLC25A4	Solute Carrier Family 25 Member 4	Protein Coding	P12235	60	GC04P185143	50.5736	https://www.genecards.org/cgi-bin/carddisp.pl?gene=SLC25A4
ACTG1	Actin Gamma 1	Protein Coding	P63261	61	GC17M081509	50.5631	https://www.genecards.org/cgi-bin/carddisp.pl?gene=ACTG1
BGLAP	Bone Gamma-Carboxyglutamate Protein	Protein Coding	P02818	52	GC01P156242	50.5466	https://www.genecards.org/cgi-bin/carddisp.pl?gene=BGLAP
CHCHD10	Coiled-Coil-Helix-Coiled-Coil-Helix Domain Containing 10	Protein Coding	Q8WYQ3	52	GC22M023765	50.4883	https://www.genecards.org/cgi-bin/carddisp.pl?gene=CHCHD10
SGCD	Sarcoglycan Delta	Protein Coding	Q92629	57	GC05P162858	50.4378	https://www.genecards.org/cgi-bin/carddisp.pl?gene=SGCD
POMC	Proopiomelanocortin	Protein Coding	P01189	61	GC02M025160	50.3949	https://www.genecards.org/cgi-bin/carddisp.pl?gene=POMC
CXCL12	C-X-C Motif Chemokine Ligand 12	Protein Coding	P48061	58	GC10M044370	50.3373	https://www.genecards.org/cgi-bin/carddisp.pl?gene=CXCL12
MT-ND1	Mitochondrially Encoded NADH:Ubiquinone Oxidoreductase Core Subunit 1	Protein Coding	P03886	47	GCMTP003309	50.335	https://www.genecards.org/cgi-bin/carddisp.pl?gene=MT-ND1
SCNN1G	Sodium Channel Epithelial 1 Subunit Gamma	Protein Coding	P51170	59	GC16P023182	50.2268	https://www.genecards.org/cgi-bin/carddisp.pl?gene=SCNN1G
NR3C1	Nuclear Receptor Subfamily 3 Group C Member 1	Protein Coding	P04150	61	GC05M143277	50.1246	https://www.genecards.org/cgi-bin/carddisp.pl?gene=NR3C1
FBN2	Fibrillin 2	Protein Coding	P35556	54	GC05M128257	50.0999	https://www.genecards.org/cgi-bin/carddisp.pl?gene=FBN2
HUWE1	HECT, UBA And WWE Domain Containing E3 Ubiquitin Protein Ligase 1	Protein Coding	Q7Z6Z7	59	GC0XM053532	50.0389	https://www.genecards.org/cgi-bin/carddisp.pl?gene=HUWE1
RARS2	Arginyl-TRNA Synthetase 2, Mitochondrial	Protein Coding	Q5T160	54	GC06M115693	49.9712	https://www.genecards.org/cgi-bin/carddisp.pl?gene=RARS2
HBA2	Hemoglobin Subunit Alpha 2	Protein Coding	P69905	52	GC16P135864	49.914	https://www.genecards.org/cgi-bin/carddisp.pl?gene=HBA2
FOXC1	Forkhead Box C1	Protein Coding	Q12948	55	GC06P020486	49.898	https://www.genecards.org/cgi-bin/carddisp.pl?gene=FOXC1
COL6A2	Collagen Type VI Alpha 2 Chain	Protein Coding	P12110	57	GC21P052794	49.8968	https://www.genecards.org/cgi-bin/carddisp.pl?gene=COL6A2
MMACHC	Metabolism Of Cobalamin Associated C	Protein Coding	Q9Y4U1	55	GC01P045500	49.8831	https://www.genecards.org/cgi-bin/carddisp.pl?gene=MMACHC
TK2	Thymidine Kinase 2	Protein Coding	O00142	54	GC16M066508	49.8582	https://www.genecards.org/cgi-bin/carddisp.pl?gene=TK2
MPI	Mannose Phosphate Isomerase	Protein Coding	P34949	55	GC15P074890	49.8503	https://www.genecards.org/cgi-bin/carddisp.pl?gene=MPI
FGA	Fibrinogen Alpha Chain	Protein Coding	P02671	62	GC04M154583	49.8041	https://www.genecards.org/cgi-bin/carddisp.pl?gene=FGA
KITLG	KIT Ligand	Protein Coding	P21583	60	GC12M088492	49.7689	https://www.genecards.org/cgi-bin/carddisp.pl?gene=KITLG
IL2RG	Interleukin 2 Receptor Subunit Gamma	Protein Coding	P31785	60	GC0XM071149	49.7373	https://www.genecards.org/cgi-bin/carddisp.pl?gene=IL2RG
ALS2	Alsin Rho Guanine Nucleotide Exchange Factor ALS2	Protein Coding	Q96Q42	55	GC02M201829	49.7275	https://www.genecards.org/cgi-bin/carddisp.pl?gene=ALS2
LAMB3	Laminin Subunit Beta 3	Protein Coding	Q13751	58	GC01M209614	49.7104	https://www.genecards.org/cgi-bin/carddisp.pl?gene=LAMB3
FAT4	FAT Atypical Cadherin 4	Protein Coding	Q6V0I7	51	GC04P125315	49.6988	https://www.genecards.org/cgi-bin/carddisp.pl?gene=FAT4
FLNB	Filamin B	Protein Coding	O75369	60	GC03P058008	49.6368	https://www.genecards.org/cgi-bin/carddisp.pl?gene=FLNB
TCTN2	Tectonic Family Member 2	Protein Coding	Q96GX1	51	GC12P123671	49.6219	https://www.genecards.org/cgi-bin/carddisp.pl?gene=TCTN2
PKLR	Pyruvate Kinase L/R	Protein Coding	P30613	59	GC01M155289	49.6108	https://www.genecards.org/cgi-bin/carddisp.pl?gene=PKLR
NPPB	Natriuretic Peptide B	Protein Coding	P16860	55	GC01M040727	49.575	https://www.genecards.org/cgi-bin/carddisp.pl?gene=NPPB
SCN10A	Sodium Voltage-Gated Channel Alpha Subunit 10	Protein Coding	Q9Y5Y9	59	GC03M038924	49.5248	https://www.genecards.org/cgi-bin/carddisp.pl?gene=SCN10A
UBA1	Ubiquitin Like Modifier Activating Enzyme 1	Protein Coding	P22314	61	GC0XP047190	49.5215	https://www.genecards.org/cgi-bin/carddisp.pl?gene=UBA1
ELN	Elastin	Protein Coding	P15502	55	GC07P074027	49.5166	https://www.genecards.org/cgi-bin/carddisp.pl?gene=ELN
ALG2	ALG2 Alpha-1,3/1,6-Mannosyltransferase	Protein Coding	Q9H553	53	GC09M099216	49.5157	https://www.genecards.org/cgi-bin/carddisp.pl?gene=ALG2
PLCG2	Phospholipase C Gamma 2	Protein Coding	P16885	64	GC16P138122	49.5149	https://www.genecards.org/cgi-bin/carddisp.pl?gene=PLCG2
CYBB	Cytochrome B-245 Beta Chain	Protein Coding	P04839	61	GC0XP037780	49.4814	https://www.genecards.org/cgi-bin/carddisp.pl?gene=CYBB
CACNA1F	Calcium Voltage-Gated Channel Subunit Alpha1 F	Protein Coding	O60840	55	GC0XM049205	49.4741	https://www.genecards.org/cgi-bin/carddisp.pl?gene=CACNA1F
CYP17A1	Cytochrome P450 Family 17 Subfamily A Member 1	Protein Coding	P05093	61	GC10M102830	49.4434	https://www.genecards.org/cgi-bin/carddisp.pl?gene=CYP17A1
ADA2	Adenosine Deaminase 2	Protein Coding	Q9NZK5	53	GC22M090116	49.4067	https://www.genecards.org/cgi-bin/carddisp.pl?gene=ADA2
CYP19A1	Cytochrome P450 Family 19 Subfamily A Member 1	Protein Coding	P11511	60	GC15M051208	49.3816	https://www.genecards.org/cgi-bin/carddisp.pl?gene=CYP19A1
GP1BA	Glycoprotein Ib Platelet Subunit Alpha	Protein Coding	P07359	59	GC17P004932	49.3679	https://www.genecards.org/cgi-bin/carddisp.pl?gene=GP1BA
HADHB	Hydroxyacyl-CoA Dehydrogenase Trifunctional Multienzyme Complex Subunit Beta	Protein Coding	P55084	58	GC02P026243	49.3515	https://www.genecards.org/cgi-bin/carddisp.pl?gene=HADHB
UCP3	Uncoupling Protein 3	Protein Coding	P55916	54	GC11M074000	49.2421	https://www.genecards.org/cgi-bin/carddisp.pl?gene=UCP3
NEAT1	Nuclear Paraspeckle Assembly Transcript 1	RNA Gene		33	GC11P129888	49.2066	https://www.genecards.org/cgi-bin/carddisp.pl?gene=NEAT1
SCP2	Sterol Carrier Protein 2	Protein Coding	P22307	58	GC01P052927	49.2063	https://www.genecards.org/cgi-bin/carddisp.pl?gene=SCP2
ADA	Adenosine Deaminase	Protein Coding	P00813	64	GC20M044620	49.2045	https://www.genecards.org/cgi-bin/carddisp.pl?gene=ADA
BCHE	Butyrylcholinesterase	Protein Coding	P06276	63	GC03M165772	49.1798	https://www.genecards.org/cgi-bin/carddisp.pl?gene=BCHE
UGT1A3	UDP Glucuronosyltransferase Family 1 Member A3	Protein Coding	P35503	52	GC02P233729	49.1626	https://www.genecards.org/cgi-bin/carddisp.pl?gene=UGT1A3
HOXD13	Homeobox D13	Protein Coding	P35453	53	GC02P176092	49.1443	https://www.genecards.org/cgi-bin/carddisp.pl?gene=HOXD13
TAP2	Transporter 2, ATP Binding Cassette Subfamily B Member	Protein Coding	Q03519	57	GC06M032821	49.1427	https://www.genecards.org/cgi-bin/carddisp.pl?gene=TAP2
HSD17B10	Hydroxysteroid 17-Beta Dehydrogenase 10	Protein Coding	Q99714	59	GC0XM053431	49.1049	https://www.genecards.org/cgi-bin/carddisp.pl?gene=HSD17B10
FUS	FUS RNA Binding Protein	Protein Coding	P35637	57	GC16P031180	49.0926	https://www.genecards.org/cgi-bin/carddisp.pl?gene=FUS
ADCY10	Adenylate Cyclase 10	Protein Coding	Q96PN6	55	GC01M167809	49.0791	https://www.genecards.org/cgi-bin/carddisp.pl?gene=ADCY10
CDAN1	Codanin 1	Protein Coding	Q8IWY9	48	GC15M042723	49.0765	https://www.genecards.org/cgi-bin/carddisp.pl?gene=CDAN1
TYMP	Thymidine Phosphorylase	Protein Coding	P19971	60	GC22M050525	49.0718	https://www.genecards.org/cgi-bin/carddisp.pl?gene=TYMP
SLC5A7	Solute Carrier Family 5 Member 7	Protein Coding	Q9GZV3	55	GC02P107969	48.9966	https://www.genecards.org/cgi-bin/carddisp.pl?gene=SLC5A7
ATP1A1	ATPase Na+/K+ Transporting Subunit Alpha 1	Protein Coding	P05023	61	GC01P116372	48.9681	https://www.genecards.org/cgi-bin/carddisp.pl?gene=ATP1A1
UGT1A7	UDP Glucuronosyltransferase Family 1 Member A7	Protein Coding	Q9HAW7	53	GC02P233681	48.9291	https://www.genecards.org/cgi-bin/carddisp.pl?gene=UGT1A7
DPM1	Dolichyl-Phosphate Mannosyltransferase Subunit 1, Catalytic	Protein Coding	O60762	55	GC20M050934	48.914	https://www.genecards.org/cgi-bin/carddisp.pl?gene=DPM1
PTHLH	Parathyroid Hormone Like Hormone	Protein Coding	P12272	57	GC12M039271	48.8946	https://www.genecards.org/cgi-bin/carddisp.pl?gene=PTHLH
NOD2	Nucleotide Binding Oligomerization Domain Containing 2	Protein Coding	Q9HC29	60	GC16P050693	48.8783	https://www.genecards.org/cgi-bin/carddisp.pl?gene=NOD2
KCNQ1OT1	KCNQ1 Opposite Strand/Antisense Transcript 1	RNA Gene		35	GC11M016626	48.8119	https://www.genecards.org/cgi-bin/carddisp.pl?gene=KCNQ1OT1
MSX2	Msh Homeobox 2	Protein Coding	P35548	56	GC05P174724	48.7898	https://www.genecards.org/cgi-bin/carddisp.pl?gene=MSX2
GNS	Glucosamine (N-Acetyl)-6-Sulfatase	Protein Coding	P15586	56	GC12M064713	48.7413	https://www.genecards.org/cgi-bin/carddisp.pl?gene=GNS
FOS	Fos Proto-Oncogene, AP-1 Transcription Factor Subunit	Protein Coding	P01100	64	GC14P075278	48.7406	https://www.genecards.org/cgi-bin/carddisp.pl?gene=FOS
MBL2	Mannose Binding Lectin 2	Protein Coding	P11226	59	GC10M052760	48.7117	https://www.genecards.org/cgi-bin/carddisp.pl?gene=MBL2
SMC1A	Structural Maintenance Of Chromosomes 1A	Protein Coding	Q14683	60	GC0XM053374	48.6808	https://www.genecards.org/cgi-bin/carddisp.pl?gene=SMC1A
ERCC8	ERCC Excision Repair 8, CSA Ubiquitin Ligase Complex Subunit	Protein Coding	Q13216	55	GC05M060933	48.6589	https://www.genecards.org/cgi-bin/carddisp.pl?gene=ERCC8
VAPB	VAMP Associated Protein B And C	Protein Coding	O95292	57	GC20P058389	48.6544	https://www.genecards.org/cgi-bin/carddisp.pl?gene=VAPB
RUNX1	RUNX Family Transcription Factor 1	Protein Coding	Q01196	61	GC21M034787	48.6245	https://www.genecards.org/cgi-bin/carddisp.pl?gene=RUNX1
GATA2	GATA Binding Protein 2~Name Same As:- HGNC:18350	Protein Coding	P23769	61	GC03M128479	48.6243	https://www.genecards.org/cgi-bin/carddisp.pl?gene=GATA2
COMT	Catechol-O-Methyltransferase	Protein Coding	P21964	63	GC22P019941	48.6074	https://www.genecards.org/cgi-bin/carddisp.pl?gene=COMT
ERCC4	ERCC Excision Repair 4, Endonuclease Catalytic Subunit	Protein Coding	Q92889	58	GC16P013920	48.5312	https://www.genecards.org/cgi-bin/carddisp.pl?gene=ERCC4
PANK2	Pantothenate Kinase 2	Protein Coding	Q9BZ23	57	GC20P012422	48.5265	https://www.genecards.org/cgi-bin/carddisp.pl?gene=PANK2
LMNB2	Lamin B2	Protein Coding	Q03252	55	GC19M115370	48.521	https://www.genecards.org/cgi-bin/carddisp.pl?gene=LMNB2
CD4	CD4 Molecule	Protein Coding	P01730	63	GC12P006786	48.5102	https://www.genecards.org/cgi-bin/carddisp.pl?gene=CD4
IFNA1	Interferon Alpha 1	Protein Coding	P01562	51	GC09P022195	48.5018	https://www.genecards.org/cgi-bin/carddisp.pl?gene=IFNA1
MMADHC	Metabolism Of Cobalamin Associated D	Protein Coding	Q9H3L0	54	GC02M149569	48.4981	https://www.genecards.org/cgi-bin/carddisp.pl?gene=MMADHC
MMAB	Metabolism Of Cobalamin Associated B	Protein Coding	Q96EY8	55	GC12M109553	48.457	https://www.genecards.org/cgi-bin/carddisp.pl?gene=MMAB
SLC39A13	Solute Carrier Family 39 Member 13	Protein Coding	Q96H72	51	GC11P047407	48.4569	https://www.genecards.org/cgi-bin/carddisp.pl?gene=SLC39A13
TF	Transferrin	Protein Coding	P02787	64	GC03P145212	48.453	https://www.genecards.org/cgi-bin/carddisp.pl?gene=TF
TRDN	Triadin	Protein Coding	Q13061	52	GC06M123198	48.3659	https://www.genecards.org/cgi-bin/carddisp.pl?gene=TRDN
CREB1	CAMP Responsive Element Binding Protein 1	Protein Coding	P16220	63	GC02P207529	48.2935	https://www.genecards.org/cgi-bin/carddisp.pl?gene=CREB1
SCN1B	Sodium Voltage-Gated Channel Beta Subunit 1	Protein Coding	Q07699	57	GC19P035030	48.2757	https://www.genecards.org/cgi-bin/carddisp.pl?gene=SCN1B
BMP1	Bone Morphogenetic Protein 1	Protein Coding	P13497	61	GC08P022165	48.2715	https://www.genecards.org/cgi-bin/carddisp.pl?gene=BMP1
RAG2	Recombination Activating 2	Protein Coding	P55895	51	GC11M036575	48.1423	https://www.genecards.org/cgi-bin/carddisp.pl?gene=RAG2
HADH	Hydroxyacyl-CoA Dehydrogenase	Protein Coding	Q16836	59	GC04P107989	48.1006	https://www.genecards.org/cgi-bin/carddisp.pl?gene=HADH
SELE	Selectin E	Protein Coding	P16581	56	GC01M169722	48.0813	https://www.genecards.org/cgi-bin/carddisp.pl?gene=SELE
ALOX12B	Arachidonate 12-Lipoxygenase, 12R Type	Protein Coding	O75342	55	GC17M103773	48.0608	https://www.genecards.org/cgi-bin/carddisp.pl?gene=ALOX12B
PRPH2	Peripherin 2	Protein Coding	P23942	51	GC06M115170	48.0516	https://www.genecards.org/cgi-bin/carddisp.pl?gene=PRPH2
CUL3	Cullin 3	Protein Coding	Q13618	60	GC02M224470	48.048	https://www.genecards.org/cgi-bin/carddisp.pl?gene=CUL3
PRRT2	Proline Rich Transmembrane Protein 2	Protein Coding	Q7Z6L0	52	GC16P029811	47.9723	https://www.genecards.org/cgi-bin/carddisp.pl?gene=PRRT2
ASS1	Argininosuccinate Synthase 1	Protein Coding	P00966	61	GC09P160995	47.9666	https://www.genecards.org/cgi-bin/carddisp.pl?gene=ASS1
CDKN1A	Cyclin Dependent Kinase Inhibitor 1A	Protein Coding	P38936	63	GC06P199656	47.9666	https://www.genecards.org/cgi-bin/carddisp.pl?gene=CDKN1A
IGFBP1	Insulin Like Growth Factor Binding Protein 1	Protein Coding	P08833	55	GC07P052768	47.9578	https://www.genecards.org/cgi-bin/carddisp.pl?gene=IGFBP1
PTK2	Protein Tyrosine Kinase 2	Protein Coding	Q05397	61	GC08M140657	47.9411	https://www.genecards.org/cgi-bin/carddisp.pl?gene=PTK2
SREBF2	Sterol Regulatory Element Binding Transcription Factor 2	Protein Coding	Q12772	55	GC22P041833	47.9185	https://www.genecards.org/cgi-bin/carddisp.pl?gene=SREBF2
TFAP2B	Transcription Factor AP-2 Beta	Protein Coding	Q92481	56	GC06P199768	47.9176	https://www.genecards.org/cgi-bin/carddisp.pl?gene=TFAP2B
PAPSS2	3''-Phosphoadenosine 5''-Phosphosulfate Synthase 2	Protein Coding	O95340	54	GC10P087659	47.8946	https://www.genecards.org/cgi-bin/carddisp.pl?gene=PAPSS2
WHRN	Whirlin	Protein Coding	Q9P202	47	GC09M134402	47.8709	https://www.genecards.org/cgi-bin/carddisp.pl?gene=WHRN
TYRP1	Tyrosinase Related Protein 1	Protein Coding	P17643	58	GC09P012683	47.8666	https://www.genecards.org/cgi-bin/carddisp.pl?gene=TYRP1
ATP7B	ATPase Copper Transporting Beta	Protein Coding	P35670	61	GC13M051930	47.8536	https://www.genecards.org/cgi-bin/carddisp.pl?gene=ATP7B
DNAH8	Dynein Axonemal Heavy Chain 8	Protein Coding	Q96JB1	48	GC06P199673	47.8429	https://www.genecards.org/cgi-bin/carddisp.pl?gene=DNAH8
BLM	BLM RecQ Like Helicase	Protein Coding	P54132	62	GC15P090717	47.7722	https://www.genecards.org/cgi-bin/carddisp.pl?gene=BLM
CAVIN1	Caveolae Associated Protein 1	Protein Coding	Q6NZI2	52	GC17M104760	47.7457	https://www.genecards.org/cgi-bin/carddisp.pl?gene=CAVIN1
HMGCR	3-Hydroxy-3-Methylglutaryl-CoA Reductase	Protein Coding	P04035	60	GC05P075336	47.6739	https://www.genecards.org/cgi-bin/carddisp.pl?gene=HMGCR
JAG1	Jagged Canonical Notch Ligand 1	Protein Coding	P78504	63	GC20M010637	47.6417	https://www.genecards.org/cgi-bin/carddisp.pl?gene=JAG1
UGT1A10	UDP Glucuronosyltransferase Family 1 Member A10	Protein Coding	Q9HAW8	55	GC02P233636	47.6287	https://www.genecards.org/cgi-bin/carddisp.pl?gene=UGT1A10
COL9A1	Collagen Type IX Alpha 1 Chain	Protein Coding	P20849	53	GC06M070215	47.6255	https://www.genecards.org/cgi-bin/carddisp.pl?gene=COL9A1
MOCS2	Molybdenum Cofactor Synthesis 2	Protein Coding	O96033	54	GC05M053095	47.625	https://www.genecards.org/cgi-bin/carddisp.pl?gene=MOCS2
ITGAM	Integrin Subunit Alpha M	Protein Coding	P11215	61	GC16P136859	47.6016	https://www.genecards.org/cgi-bin/carddisp.pl?gene=ITGAM
CCR2	C-C Motif Chemokine Receptor 2	Protein Coding	P41597	58	GC03P069069	47.5717	https://www.genecards.org/cgi-bin/carddisp.pl?gene=CCR2
LAMC2	Laminin Subunit Gamma 2	Protein Coding	Q13753	59	GC01P183186	47.5679	https://www.genecards.org/cgi-bin/carddisp.pl?gene=LAMC2
COL10A1	Collagen Type X Alpha 1 Chain	Protein Coding	Q03692	53	GC06M116118	47.3931	https://www.genecards.org/cgi-bin/carddisp.pl?gene=COL10A1
SMN2	Survival Of Motor Neuron 2, Centromeric	Protein Coding	Q16637	51	GC05P070049	47.3595	https://www.genecards.org/cgi-bin/carddisp.pl?gene=SMN2
ALK	ALK Receptor Tyrosine Kinase	Protein Coding	Q9UM73	64	GC02M029467	47.2887	https://www.genecards.org/cgi-bin/carddisp.pl?gene=ALK
HP	Haptoglobin	Protein Coding	P00738	58	GC16P137865	47.2232	https://www.genecards.org/cgi-bin/carddisp.pl?gene=HP
KMT2D	Lysine Methyltransferase 2D	Protein Coding	O14686	56	GC12M049018	47.2009	https://www.genecards.org/cgi-bin/carddisp.pl?gene=KMT2D
IL1R1	Interleukin 1 Receptor Type 1	Protein Coding	P14778	60	GC02P102884	47.1696	https://www.genecards.org/cgi-bin/carddisp.pl?gene=IL1R1
CYP2R1	Cytochrome P450 Family 2 Subfamily R Member 1	Protein Coding	Q6VVX0	55	GC11M014877	47.14	https://www.genecards.org/cgi-bin/carddisp.pl?gene=CYP2R1
PLTP	Phospholipid Transfer Protein	Protein Coding	P55058	57	GC20M045898	47.1297	https://www.genecards.org/cgi-bin/carddisp.pl?gene=PLTP
ADRB3	Adrenoceptor Beta 3	Protein Coding	P13945	55	GC08M037962	47.1262	https://www.genecards.org/cgi-bin/carddisp.pl?gene=ADRB3
FNDC5	Fibronectin Type III Domain Containing 5	Protein Coding	Q8NAU1	47	GC01M041562	47.1223	https://www.genecards.org/cgi-bin/carddisp.pl?gene=FNDC5
PTPRN2	Protein Tyrosine Phosphatase Receptor Type N2	Protein Coding	Q92932	57	GC07M157539	47.0804	https://www.genecards.org/cgi-bin/carddisp.pl?gene=PTPRN2
OPTN	Optineurin	Protein Coding	Q96CV9	55	GC10P013099	47.0271	https://www.genecards.org/cgi-bin/carddisp.pl?gene=OPTN
CTSD	Cathepsin D	Protein Coding	P07339	65	GC11M001752	47.0083	https://www.genecards.org/cgi-bin/carddisp.pl?gene=CTSD
FA2H	Fatty Acid 2-Hydroxylase	Protein Coding	Q7L5A8	57	GC16M074712	46.9866	https://www.genecards.org/cgi-bin/carddisp.pl?gene=FA2H
EIF2AK4	Eukaryotic Translation Initiation Factor 2 Alpha Kinase 4	Protein Coding	Q9P2K8	57	GC15P039934	46.9613	https://www.genecards.org/cgi-bin/carddisp.pl?gene=EIF2AK4
ATL3	Atlastin GTPase 3	Protein Coding	Q6DD88	50	GC11M063624	46.9596	https://www.genecards.org/cgi-bin/carddisp.pl?gene=ATL3
RFXANK	Regulatory Factor X Associated Ankyrin Containing Protein	Protein Coding	O14593	49	GC19P171242	46.9055	https://www.genecards.org/cgi-bin/carddisp.pl?gene=RFXANK
CES1	Carboxylesterase 1	Protein Coding	P23141	61	GC16M055841	46.886	https://www.genecards.org/cgi-bin/carddisp.pl?gene=CES1
EDA	Ectodysplasin A	Protein Coding	Q92838	53	GC0XP069618	46.8826	https://www.genecards.org/cgi-bin/carddisp.pl?gene=EDA
NPHP3	Nephrocystin 3	Protein Coding	Q7Z494	51	GC03M132878	46.8415	https://www.genecards.org/cgi-bin/carddisp.pl?gene=NPHP3
MYH11	Myosin Heavy Chain 11	Protein Coding	P35749	58	GC16M055700	46.8119	https://www.genecards.org/cgi-bin/carddisp.pl?gene=MYH11
CXCL10	C-X-C Motif Chemokine Ligand 10	Protein Coding	P02778	57	GC04M076021	46.7989	https://www.genecards.org/cgi-bin/carddisp.pl?gene=CXCL10
MSH6	MutS Homolog 6	Protein Coding	P52701	61	GC02P047695	46.7613	https://www.genecards.org/cgi-bin/carddisp.pl?gene=MSH6
GFPT1	Glutamine--Fructose-6-Phosphate Transaminase 1	Protein Coding	Q06210	59	GC02M069319	46.7472	https://www.genecards.org/cgi-bin/carddisp.pl?gene=GFPT1
ACAN	Aggrecan	Protein Coding	P16112	59	GC15P211414	46.7455	https://www.genecards.org/cgi-bin/carddisp.pl?gene=ACAN
SLC29A3	Solute Carrier Family 29 Member 3	Protein Coding	Q9BZD2	54	GC10P076878	46.7393	https://www.genecards.org/cgi-bin/carddisp.pl?gene=SLC29A3
GLA	Galactosidase Alpha	Protein Coding	P06280	61	GC0XM101393	46.7301	https://www.genecards.org/cgi-bin/carddisp.pl?gene=GLA
ZEB2	Zinc Finger E-Box Binding Homeobox 2	Protein Coding	O60315	61	GC02M144384	46.7252	https://www.genecards.org/cgi-bin/carddisp.pl?gene=ZEB2
IGF2R	Insulin Like Growth Factor 2 Receptor	Protein Coding	P11717	59	GC06P159969	46.7242	https://www.genecards.org/cgi-bin/carddisp.pl?gene=IGF2R
GRHPR	Glyoxylate And Hydroxypyruvate Reductase	Protein Coding	Q9UBQ7	58	GC09P085610	46.6945	https://www.genecards.org/cgi-bin/carddisp.pl?gene=GRHPR
PCSK2	Proprotein Convertase Subtilisin/Kexin Type 2	Protein Coding	P16519	57	GC20P017226	46.6896	https://www.genecards.org/cgi-bin/carddisp.pl?gene=PCSK2
EIF2AK2	Eukaryotic Translation Initiation Factor 2 Alpha Kinase 2	Protein Coding	P19525	62	GC02M037099	46.6778	https://www.genecards.org/cgi-bin/carddisp.pl?gene=EIF2AK2
SLC12A3	Solute Carrier Family 12 Member 3	Protein Coding	P55017	60	GC16P056865	46.6667	https://www.genecards.org/cgi-bin/carddisp.pl?gene=SLC12A3
AMPD2	Adenosine Monophosphate Deaminase 2	Protein Coding	Q01433	58	GC01P109616	46.6613	https://www.genecards.org/cgi-bin/carddisp.pl?gene=AMPD2
PEX5	Peroxisomal Biogenesis Factor 5	Protein Coding	P50542	56	GC12P085746	46.5599	https://www.genecards.org/cgi-bin/carddisp.pl?gene=PEX5
KNG1	Kininogen 1	Protein Coding	P01042	60	GC03P186717	46.5569	https://www.genecards.org/cgi-bin/carddisp.pl?gene=KNG1
HGF	Hepatocyte Growth Factor	Protein Coding	P14210	64	GC07M081699	46.524	https://www.genecards.org/cgi-bin/carddisp.pl?gene=HGF
PRMT7	Protein Arginine Methyltransferase 7	Protein Coding	Q9NVM4	54	GC16P137692	46.464	https://www.genecards.org/cgi-bin/carddisp.pl?gene=PRMT7
MPO	Myeloperoxidase	Protein Coding	P05164	65	GC17M058269	46.4518	https://www.genecards.org/cgi-bin/carddisp.pl?gene=MPO
MASP2	MBL Associated Serine Protease 2	Protein Coding	O00187	59	GC01M040697	46.4087	https://www.genecards.org/cgi-bin/carddisp.pl?gene=MASP2
FKBP10	FKBP Prolyl Isomerase 10	Protein Coding	Q96AY3	53	GC17P041812	46.3833	https://www.genecards.org/cgi-bin/carddisp.pl?gene=FKBP10
GFAP	Glial Fibrillary Acidic Protein	Protein Coding	P14136	60	GC17M104866	46.3797	https://www.genecards.org/cgi-bin/carddisp.pl?gene=GFAP
SLC35C1	Solute Carrier Family 35 Member C1	Protein Coding	Q96A29	51	GC11P049859	46.3697	https://www.genecards.org/cgi-bin/carddisp.pl?gene=SLC35C1
TREM2	Triggering Receptor Expressed On Myeloid Cells 2	Protein Coding	Q9NZC2	57	GC06M115139	46.3295	https://www.genecards.org/cgi-bin/carddisp.pl?gene=TREM2
ADAMTS13	ADAM Metallopeptidase With Thrombospondin Type 1 Motif 13	Protein Coding	Q76LX8	60	GC09P133414	46.3242	https://www.genecards.org/cgi-bin/carddisp.pl?gene=ADAMTS13
TGM2	Transglutaminase 2	Protein Coding	P21980	60	GC20M038127	46.3227	https://www.genecards.org/cgi-bin/carddisp.pl?gene=TGM2
LPA	Lipoprotein(A)	Protein Coding	P08519	55	GC06M160531	46.3153	https://www.genecards.org/cgi-bin/carddisp.pl?gene=LPA
MGAT2	Alpha-1,6-Mannosyl-Glycoprotein 2-Beta-N-Acetylglucosaminyltransferase	Protein Coding	Q10469	56	GC14P049620	46.2745	https://www.genecards.org/cgi-bin/carddisp.pl?gene=MGAT2
JAK3	Janus Kinase 3	Protein Coding	P52333	64	GC19M017824	46.2718	https://www.genecards.org/cgi-bin/carddisp.pl?gene=JAK3
G6PD	Glucose-6-Phosphate Dehydrogenase	Protein Coding	P11413	63	GC0XM154638	46.2416	https://www.genecards.org/cgi-bin/carddisp.pl?gene=G6PD
PDE4D	Phosphodiesterase 4D	Protein Coding	Q08499	61	GC05M058969	46.2303	https://www.genecards.org/cgi-bin/carddisp.pl?gene=PDE4D
CASP10	Caspase 10	Protein Coding	Q92851	60	GC02P201182	46.2064	https://www.genecards.org/cgi-bin/carddisp.pl?gene=CASP10
RHO	Rhodopsin	Protein Coding	P08100	59	GC03P145157	46.2046	https://www.genecards.org/cgi-bin/carddisp.pl?gene=RHO
VSX2	Visual System Homeobox 2	Protein Coding	P58304	51	GC14P074239	46.1807	https://www.genecards.org/cgi-bin/carddisp.pl?gene=VSX2
COMP	Cartilage Oligomeric Matrix Protein	Protein Coding	P49747	58	GC19M115950	46.1661	https://www.genecards.org/cgi-bin/carddisp.pl?gene=COMP
RB1	RB Transcriptional Corepressor 1	Protein Coding	P06400	61	GC13P048303	46.1649	https://www.genecards.org/cgi-bin/carddisp.pl?gene=RB1
KCNQ3	Potassium Voltage-Gated Channel Subfamily Q Member 3	Protein Coding	O43525	59	GC08M132120	46.1637	https://www.genecards.org/cgi-bin/carddisp.pl?gene=KCNQ3
TGFBI	Transforming Growth Factor Beta Induced	Protein Coding	Q15582	57	GC05P136314	46.0713	https://www.genecards.org/cgi-bin/carddisp.pl?gene=TGFBI
AMHR2	Anti-Mullerian Hormone Receptor Type 2	Protein Coding	Q16671	58	GC12P053423	46.0417	https://www.genecards.org/cgi-bin/carddisp.pl?gene=AMHR2
SLC5A1	Solute Carrier Family 5 Member 1	Protein Coding	P13866	59	GC22P032043	46.0129	https://www.genecards.org/cgi-bin/carddisp.pl?gene=SLC5A1
CDC73	Cell Division Cycle 73	Protein Coding	Q6P1J9	58	GC01P193151	45.9935	https://www.genecards.org/cgi-bin/carddisp.pl?gene=CDC73
VCAM1	Vascular Cell Adhesion Molecule 1	Protein Coding	P19320	58	GC01P100719	45.9797	https://www.genecards.org/cgi-bin/carddisp.pl?gene=VCAM1
COG5	Component Of Oligomeric Golgi Complex 5	Protein Coding	Q9UP83	50	GC07M107201	45.9663	https://www.genecards.org/cgi-bin/carddisp.pl?gene=COG5
B3GAT3	Beta-1,3-Glucuronyltransferase 3	Protein Coding	O94766	57	GC11M146060	45.9394	https://www.genecards.org/cgi-bin/carddisp.pl?gene=B3GAT3
ANGPT1	Angiopoietin 1	Protein Coding	Q15389	60	GC08M107246	45.8415	https://www.genecards.org/cgi-bin/carddisp.pl?gene=ANGPT1
CTNS	Cystinosin, Lysosomal Cystine Transporter	Protein Coding	O60931	56	GC17P003636	45.7663	https://www.genecards.org/cgi-bin/carddisp.pl?gene=CTNS
CCL5	C-C Motif Chemokine Ligand 5	Protein Coding	P13501	56	GC17M035871	45.7661	https://www.genecards.org/cgi-bin/carddisp.pl?gene=CCL5
GRB2	Growth Factor Receptor Bound Protein 2	Protein Coding	P62993	60	GC17M075318	45.7128	https://www.genecards.org/cgi-bin/carddisp.pl?gene=GRB2
DNAJC3	DnaJ Heat Shock Protein Family (Hsp40) Member C3	Protein Coding	Q13217	51	GC13P095677	45.7082	https://www.genecards.org/cgi-bin/carddisp.pl?gene=DNAJC3
MMP3	Matrix Metallopeptidase 3	Protein Coding	P08254	62	GC11M102835	45.6245	https://www.genecards.org/cgi-bin/carddisp.pl?gene=MMP3
TMPO	Thymopoietin	Protein Coding	P42166	59	GC12P098515	45.6228	https://www.genecards.org/cgi-bin/carddisp.pl?gene=TMPO
PLA2G7	Phospholipase A2 Group VII	Protein Coding	Q13093	63	GC06M046704	45.5903	https://www.genecards.org/cgi-bin/carddisp.pl?gene=PLA2G7
ACTA1	Actin Alpha 1, Skeletal Muscle	Protein Coding	P68133	60	GC01M231082	45.5219	https://www.genecards.org/cgi-bin/carddisp.pl?gene=ACTA1
DDOST	Dolichyl-Diphosphooligosaccharide--Protein Glycosyltransferase Non-Catalytic Subunit	Protein Coding	P39656	57	GC01M020651	45.5027	https://www.genecards.org/cgi-bin/carddisp.pl?gene=DDOST
ALG3	ALG3 Alpha-1,3- Mannosyltransferase	Protein Coding	Q92685	54	GC03M184244	45.4737	https://www.genecards.org/cgi-bin/carddisp.pl?gene=ALG3
CDKN2B-AS1	CDKN2B And CDKN2A Antisense Cis And Trans Regulatory RNA 1	RNA Gene		32	GC09P021994	45.449	https://www.genecards.org/cgi-bin/carddisp.pl?gene=CDKN2B-AS1
ARID1A	AT-Rich Interaction Domain 1A	Protein Coding	O14497	57	GC01P026693	45.4416	https://www.genecards.org/cgi-bin/carddisp.pl?gene=ARID1A
EXOSC3	Exosome Component 3	Protein Coding	Q9NQT5	54	GC09M037775	45.4277	https://www.genecards.org/cgi-bin/carddisp.pl?gene=EXOSC3
GDF2	Growth Differentiation Factor 2	Protein Coding	Q9UK05	57	GC10P047322	45.4221	https://www.genecards.org/cgi-bin/carddisp.pl?gene=GDF2
FERMT3	FERM Domain Containing Kindlin 3	Protein Coding	Q86UX7	55	GC11P129761	45.4076	https://www.genecards.org/cgi-bin/carddisp.pl?gene=FERMT3
SERPINH1	Serpin Family H Member 1	Protein Coding	P50454	59	GC11P130650	45.3903	https://www.genecards.org/cgi-bin/carddisp.pl?gene=SERPINH1
FBLN5	Fibulin 5	Protein Coding	Q9UBX5	59	GC14M091869	45.3879	https://www.genecards.org/cgi-bin/carddisp.pl?gene=FBLN5
IL1A	Interleukin 1 Alpha	Protein Coding	P01583	58	GC02M112773	45.3816	https://www.genecards.org/cgi-bin/carddisp.pl?gene=IL1A
EPCAM	Epithelial Cell Adhesion Molecule	Protein Coding	P16422	61	GC02P047345	45.3697	https://www.genecards.org/cgi-bin/carddisp.pl?gene=EPCAM
CHUK	Component Of Inhibitor Of Nuclear Factor Kappa B Kinase Complex	Protein Coding	O15111	63	GC10M100698	45.2335	https://www.genecards.org/cgi-bin/carddisp.pl?gene=CHUK
ERBB4	Erb-B2 Receptor Tyrosine Kinase 4	Protein Coding	Q15303	67	GC02M211375	45.2144	https://www.genecards.org/cgi-bin/carddisp.pl?gene=ERBB4
STXBP2	Syntaxin Binding Protein 2	Protein Coding	Q15833	57	GC19P170770	45.2075	https://www.genecards.org/cgi-bin/carddisp.pl?gene=STXBP2
TNFRSF13B	TNF Receptor Superfamily Member 13B	Protein Coding	O14836	59	GC17M016929	45.1934	https://www.genecards.org/cgi-bin/carddisp.pl?gene=TNFRSF13B
CDKN1C	Cyclin Dependent Kinase Inhibitor 1C	Protein Coding	P49918	59	GC11M016628	45.083	https://www.genecards.org/cgi-bin/carddisp.pl?gene=CDKN1C
PCYT1A	Phosphate Cytidylyltransferase 1A, Choline	Protein Coding	P49585	58	GC03M196214	45.0728	https://www.genecards.org/cgi-bin/carddisp.pl?gene=PCYT1A
ABCB4	ATP Binding Cassette Subfamily B Member 4	Protein Coding	P21439	59	GC07M087365	44.9968	https://www.genecards.org/cgi-bin/carddisp.pl?gene=ABCB4
MGLL	Monoglyceride Lipase	Protein Coding	Q99685	57	GC03M127689	44.9856	https://www.genecards.org/cgi-bin/carddisp.pl?gene=MGLL
HPD	4-Hydroxyphenylpyruvate Dioxygenase	Protein Coding	P32754	58	GC12M121839	44.963	https://www.genecards.org/cgi-bin/carddisp.pl?gene=HPD
PLCG1	Phospholipase C Gamma 1	Protein Coding	P19174	63	GC20P041136	44.9373	https://www.genecards.org/cgi-bin/carddisp.pl?gene=PLCG1
AFG3L2	AFG3 Like Matrix AAA Peptidase Subunit 2	Protein Coding	Q9Y4W6	57	GC18M012328	44.924	https://www.genecards.org/cgi-bin/carddisp.pl?gene=AFG3L2
PRPS1	Phosphoribosyl Pyrophosphate Synthetase 1	Protein Coding	P60891	58	GC0XP107628	44.8864	https://www.genecards.org/cgi-bin/carddisp.pl?gene=PRPS1
GATA3	GATA Binding Protein 3	Protein Coding	P23771	63	GC10P008045	44.872	https://www.genecards.org/cgi-bin/carddisp.pl?gene=GATA3
CPT1B	Carnitine Palmitoyltransferase 1B	Protein Coding	Q92523	58	GC22M090892	44.8588	https://www.genecards.org/cgi-bin/carddisp.pl?gene=CPT1B
SLC27A1	Solute Carrier Family 27 Member 1	Protein Coding	Q6PCB7	51	GC19P171216	44.8146	https://www.genecards.org/cgi-bin/carddisp.pl?gene=SLC27A1
DGKE	Diacylglycerol Kinase Epsilon	Protein Coding	P52429	58	GC17P056834	44.8125	https://www.genecards.org/cgi-bin/carddisp.pl?gene=DGKE
BCOR	BCL6 Corepressor	Protein Coding	Q6W2J9	55	GC0XM040049	44.7951	https://www.genecards.org/cgi-bin/carddisp.pl?gene=BCOR
TET2	Tet Methylcytosine Dioxygenase 2	Protein Coding	Q6N021	58	GC04P105145	44.7526	https://www.genecards.org/cgi-bin/carddisp.pl?gene=TET2
SERPINC1	Serpin Family C Member 1	Protein Coding	P01008	62	GC01M175254	44.7399	https://www.genecards.org/cgi-bin/carddisp.pl?gene=SERPINC1
CTNNA1	Catenin Alpha 1	Protein Coding	P35221	60	GC05P138911	44.7381	https://www.genecards.org/cgi-bin/carddisp.pl?gene=CTNNA1
TLR3	Toll Like Receptor 3	Protein Coding	O15455	63	GC04P186059	44.7102	https://www.genecards.org/cgi-bin/carddisp.pl?gene=TLR3
MLH3	MutL Homolog 3	Protein Coding	Q9UHC1	52	GC14M075013	44.7051	https://www.genecards.org/cgi-bin/carddisp.pl?gene=MLH3
SLC2A3	Solute Carrier Family 2 Member 3	Protein Coding	P11169	61	GC12M007919	44.6898	https://www.genecards.org/cgi-bin/carddisp.pl?gene=SLC2A3
LPIN1	Lipin 1	Protein Coding	Q14693	59	GC02P011677	44.6838	https://www.genecards.org/cgi-bin/carddisp.pl?gene=LPIN1
OBSL1	Obscurin Like Cytoskeletal Adaptor 1	Protein Coding	O75147	49	GC02M219659	44.6723	https://www.genecards.org/cgi-bin/carddisp.pl?gene=OBSL1
SERPINF2	Serpin Family F Member 2	Protein Coding	P08697	57	GC17P001742	44.6493	https://www.genecards.org/cgi-bin/carddisp.pl?gene=SERPINF2
TBX5	T-Box Transcription Factor 5	Protein Coding	Q99593	56	GC12M114353	44.6451	https://www.genecards.org/cgi-bin/carddisp.pl?gene=TBX5
MFSD8	Major Facilitator Superfamily Domain Containing 8	Protein Coding	Q8NHS3	47	GC04M127917	44.6282	https://www.genecards.org/cgi-bin/carddisp.pl?gene=MFSD8
OTX2	Orthodenticle Homeobox 2	Protein Coding	P32243	58	GC14M056799	44.6229	https://www.genecards.org/cgi-bin/carddisp.pl?gene=OTX2
BMP7	Bone Morphogenetic Protein 7	Protein Coding	P18075	60	GC20M057168	44.6174	https://www.genecards.org/cgi-bin/carddisp.pl?gene=BMP7
NPHP1	Nephrocystin 1	Protein Coding	O15259	54	GC02M110122	44.6117	https://www.genecards.org/cgi-bin/carddisp.pl?gene=NPHP1
ADAMTS9	ADAM Metallopeptidase With Thrombospondin Type 1 Motif 9	Protein Coding	Q9P2N4	51	GC03M064501	44.5933	https://www.genecards.org/cgi-bin/carddisp.pl?gene=ADAMTS9
HTRA1	HtrA Serine Peptidase 1	Protein Coding	Q92743	57	GC10P135429	44.5553	https://www.genecards.org/cgi-bin/carddisp.pl?gene=HTRA1
COL8A2	Collagen Type VIII Alpha 2 Chain	Protein Coding	P25067	51	GC01M036095	44.5191	https://www.genecards.org/cgi-bin/carddisp.pl?gene=COL8A2
INF2	Inverted Formin 2	Protein Coding	Q27J81	52	GC14P122698	44.5002	https://www.genecards.org/cgi-bin/carddisp.pl?gene=INF2
CYP27A1	Cytochrome P450 Family 27 Subfamily A Member 1	Protein Coding	Q02318	59	GC02P218781	44.4801	https://www.genecards.org/cgi-bin/carddisp.pl?gene=CYP27A1
TNNT1	Troponin T1, Slow Skeletal Type	Protein Coding	P13805	54	GC19M055132	44.435	https://www.genecards.org/cgi-bin/carddisp.pl?gene=TNNT1
BCS1L	BCS1 Ubiquinol-Cytochrome C Reductase Complex Chaperone	Protein Coding	Q9Y276	57	GC02P218658	44.4074	https://www.genecards.org/cgi-bin/carddisp.pl?gene=BCS1L
CBL	Cbl Proto-Oncogene	Protein Coding	P22681	64	GC11P119206	44.3558	https://www.genecards.org/cgi-bin/carddisp.pl?gene=CBL
ABCG5	ATP Binding Cassette Subfamily G Member 5	Protein Coding	Q9H222	58	GC02M043806	44.3501	https://www.genecards.org/cgi-bin/carddisp.pl?gene=ABCG5
PKM	Pyruvate Kinase M1/2	Protein Coding	P14618	63	GC15M072199	44.3411	https://www.genecards.org/cgi-bin/carddisp.pl?gene=PKM
LMBRD1	LMBR1 Domain Containing 1	Protein Coding	Q9NUN5	51	GC06M115437	44.3393	https://www.genecards.org/cgi-bin/carddisp.pl?gene=LMBRD1
RANBP2	RAN Binding Protein 2	Protein Coding	P49792	57	GC02P108719	44.2602	https://www.genecards.org/cgi-bin/carddisp.pl?gene=RANBP2
PRKCG	Protein Kinase C Gamma	Protein Coding	P05129	64	GC19P053879	44.177	https://www.genecards.org/cgi-bin/carddisp.pl?gene=PRKCG
COL9A3	Collagen Type IX Alpha 3 Chain	Protein Coding	Q14050	53	GC20P062816	44.1514	https://www.genecards.org/cgi-bin/carddisp.pl?gene=COL9A3
KCNQ2	Potassium Voltage-Gated Channel Subfamily Q Member 2	Protein Coding	O43526	60	GC20M063400	44.1283	https://www.genecards.org/cgi-bin/carddisp.pl?gene=KCNQ2
TTC19	Tetratricopeptide Repeat Domain 19	Protein Coding	Q6DKK2	50	GC17P015999	44.1246	https://www.genecards.org/cgi-bin/carddisp.pl?gene=TTC19
UNG	Uracil DNA Glycosylase	Protein Coding	P13051	58	GC12P109097	44.1209	https://www.genecards.org/cgi-bin/carddisp.pl?gene=UNG
CACNA1G	Calcium Voltage-Gated Channel Subunit Alpha1 G	Protein Coding	O43497	61	GC17P175927	44.0861	https://www.genecards.org/cgi-bin/carddisp.pl?gene=CACNA1G
ERCC3	ERCC Excision Repair 3, TFIIH Core Complex Helicase Subunit	Protein Coding	P19447	60	GC02M127257	44.0577	https://www.genecards.org/cgi-bin/carddisp.pl?gene=ERCC3
HSPD1	Heat Shock Protein Family D (Hsp60) Member 1	Protein Coding	P10809	61	GC02M197486	44.053	https://www.genecards.org/cgi-bin/carddisp.pl?gene=HSPD1
SLC2A10	Solute Carrier Family 2 Member 10	Protein Coding	O95528	53	GC20P060035	44.05	https://www.genecards.org/cgi-bin/carddisp.pl?gene=SLC2A10
MYL2	Myosin Light Chain 2	Protein Coding	P10916	61	GC12M112203	44.0354	https://www.genecards.org/cgi-bin/carddisp.pl?gene=MYL2
SCNN1B	Sodium Channel Epithelial 1 Subunit Beta	Protein Coding	P51168	60	GC16P023278	44.0339	https://www.genecards.org/cgi-bin/carddisp.pl?gene=SCNN1B
AIFM1	Apoptosis Inducing Factor Mitochondria Associated 1	Protein Coding	O95831	63	GC0XM130129	44.03	https://www.genecards.org/cgi-bin/carddisp.pl?gene=AIFM1
WNK4	WNK Lysine Deficient Protein Kinase 4	Protein Coding	Q96J92	55	GC17P042780	44.0277	https://www.genecards.org/cgi-bin/carddisp.pl?gene=WNK4
ETFDH	Electron Transfer Flavoprotein Dehydrogenase	Protein Coding	Q16134	58	GC04P158672	44.0211	https://www.genecards.org/cgi-bin/carddisp.pl?gene=ETFDH
CFB	Complement Factor B	Protein Coding	P00751	59	GC06P031945	43.9986	https://www.genecards.org/cgi-bin/carddisp.pl?gene=CFB
WNT1	Wnt Family Member 1	Protein Coding	P04628	59	GC12P086651	43.9945	https://www.genecards.org/cgi-bin/carddisp.pl?gene=WNT1
HDAC2	Histone Deacetylase 2	Protein Coding	Q92769	66	GC06M113933	43.9465	https://www.genecards.org/cgi-bin/carddisp.pl?gene=HDAC2
SPARC	Secreted Protein Acidic And Cysteine Rich	Protein Coding	P09486	62	GC05M151661	43.9451	https://www.genecards.org/cgi-bin/carddisp.pl?gene=SPARC
DDR2	Discoidin Domain Receptor Tyrosine Kinase 2	Protein Coding	Q16832	63	GC01P184041	43.9166	https://www.genecards.org/cgi-bin/carddisp.pl?gene=DDR2
SNCA	Synuclein Alpha	Protein Coding	P37840	64	GC04M089724	43.9156	https://www.genecards.org/cgi-bin/carddisp.pl?gene=SNCA
CASP9	Caspase 9	Protein Coding	P55211	61	GC01M040851	43.9137	https://www.genecards.org/cgi-bin/carddisp.pl?gene=CASP9
ATRX	ATRX Chromatin Remodeler	Protein Coding	P46100	58	GC0XM077504	43.8712	https://www.genecards.org/cgi-bin/carddisp.pl?gene=ATRX
LIPF	Lipase F, Gastric Type	Protein Coding	P07098	53	GC10P088664	43.8396	https://www.genecards.org/cgi-bin/carddisp.pl?gene=LIPF
CDX2	Caudal Type Homeobox 2	Protein Coding	Q99626	55	GC13M027962	43.8194	https://www.genecards.org/cgi-bin/carddisp.pl?gene=CDX2
TP63	Tumor Protein P63	Protein Coding	Q9H3D4	58	GC03P189598	43.8108	https://www.genecards.org/cgi-bin/carddisp.pl?gene=TP63
SDHAF2	Succinate Dehydrogenase Complex Assembly Factor 2	Protein Coding	Q9NX18	53	GC11P061430	43.8006	https://www.genecards.org/cgi-bin/carddisp.pl?gene=SDHAF2
RELA	RELA Proto-Oncogene, NF-KB Subunit	Protein Coding	Q04206	64	GC11M065653	43.7929	https://www.genecards.org/cgi-bin/carddisp.pl?gene=RELA
SUN2	Sad1 And UNC84 Domain Containing 2	Protein Coding	Q9UH99	51	GC22M090747	43.7921	https://www.genecards.org/cgi-bin/carddisp.pl?gene=SUN2
BCL2L11	BCL2 Like 11	Protein Coding	O43521	57	GC02P111119	43.7752	https://www.genecards.org/cgi-bin/carddisp.pl?gene=BCL2L11
TWNK	Twinkle MtDNA Helicase	Protein Coding	Q96RR1	55	GC10P134718	43.7706	https://www.genecards.org/cgi-bin/carddisp.pl?gene=TWNK
ACADVL	Acyl-CoA Dehydrogenase Very Long Chain	Protein Coding	P49748	58	GC17P174502	43.7408	https://www.genecards.org/cgi-bin/carddisp.pl?gene=ACADVL
POLH	DNA Polymerase Eta	Protein Coding	Q9Y253	59	GC06P199710	43.7122	https://www.genecards.org/cgi-bin/carddisp.pl?gene=POLH
IGHE	Immunoglobulin Heavy Constant Epsilon	Protein Coding	P01854	43	GC14M126666	43.7052	https://www.genecards.org/cgi-bin/carddisp.pl?gene=IGHE
HK1	Hexokinase 1	Protein Coding	P19367	63	GC10P069269	43.7031	https://www.genecards.org/cgi-bin/carddisp.pl?gene=HK1
ITGA2B	Integrin Subunit Alpha 2b	Protein Coding	P08514	63	GC17M104845	43.6757	https://www.genecards.org/cgi-bin/carddisp.pl?gene=ITGA2B
DPAGT1	Dolichyl-Phosphate N-Acetylglucosaminephosphotransferase 1	Protein Coding	Q9H3H5	57	GC11M147058	43.6681	https://www.genecards.org/cgi-bin/carddisp.pl?gene=DPAGT1
PHKG2	Phosphorylase Kinase Catalytic Subunit Gamma 2	Protein Coding	P15735	55	GC16P136833	43.6643	https://www.genecards.org/cgi-bin/carddisp.pl?gene=PHKG2
STAT2	Signal Transducer And Activator Of Transcription 2	Protein Coding	P52630	61	GC12M056341	43.6576	https://www.genecards.org/cgi-bin/carddisp.pl?gene=STAT2
SHBG	Sex Hormone Binding Globulin	Protein Coding	P04278	55	GC17P007613	43.6402	https://www.genecards.org/cgi-bin/carddisp.pl?gene=SHBG
DIO2	Iodothyronine Deiodinase 2	Protein Coding	Q92813	52	GC14M080197	43.6219	https://www.genecards.org/cgi-bin/carddisp.pl?gene=DIO2
A2M	Alpha-2-Macroglobulin	Protein Coding	P01023	58	GC12M009067	43.5663	https://www.genecards.org/cgi-bin/carddisp.pl?gene=A2M
HYAL1	Hyaluronidase 1	Protein Coding	Q12794	59	GC03M050299	43.5577	https://www.genecards.org/cgi-bin/carddisp.pl?gene=HYAL1
KCNE1	Potassium Voltage-Gated Channel Subfamily E Regulatory Subunit 1	Protein Coding	P15382	57	GC21M034446	43.5465	https://www.genecards.org/cgi-bin/carddisp.pl?gene=KCNE1
CHEK1	Checkpoint Kinase 1	Protein Coding	O14757	66	GC11P125625	43.5185	https://www.genecards.org/cgi-bin/carddisp.pl?gene=CHEK1
MOGAT1	Monoacylglycerol O-Acyltransferase 1	Protein Coding	Q96PD6	44	GC02P222671	43.5074	https://www.genecards.org/cgi-bin/carddisp.pl?gene=MOGAT1
ALG8	ALG8 Alpha-1,3-Glucosyltransferase	Protein Coding	Q9BVK2	55	GC11M146559	43.4931	https://www.genecards.org/cgi-bin/carddisp.pl?gene=ALG8
IFNAR2	Interferon Alpha And Beta Receptor Subunit 2	Protein Coding	P48551	61	GC21P033229	43.4622	https://www.genecards.org/cgi-bin/carddisp.pl?gene=IFNAR2
EPHB4	EPH Receptor B4	Protein Coding	P54760	66	GC07M107411	43.4619	https://www.genecards.org/cgi-bin/carddisp.pl?gene=EPHB4
FXN	Frataxin	Protein Coding	Q16595	59	GC09P069035	43.4607	https://www.genecards.org/cgi-bin/carddisp.pl?gene=FXN
UCP1	Uncoupling Protein 1	Protein Coding	P25874	57	GC04M140559	43.4515	https://www.genecards.org/cgi-bin/carddisp.pl?gene=UCP1
PTK2B	Protein Tyrosine Kinase 2 Beta	Protein Coding	Q14289	62	GC08P027341	43.4428	https://www.genecards.org/cgi-bin/carddisp.pl?gene=PTK2B
UGT1A5	UDP Glucuronosyltransferase Family 1 Member A5	Protein Coding	P35504	47	GC02P233712	43.4236	https://www.genecards.org/cgi-bin/carddisp.pl?gene=UGT1A5
TRIP11	Thyroid Hormone Receptor Interactor 11	Protein Coding	Q15643	52	GC14M091965	43.3899	https://www.genecards.org/cgi-bin/carddisp.pl?gene=TRIP11
HAVCR2	Hepatitis A Virus Cellular Receptor 2	Protein Coding	Q8TDQ0	58	GC05M157063	43.3452	https://www.genecards.org/cgi-bin/carddisp.pl?gene=HAVCR2
ARG1	Arginase 1	Protein Coding	P05089	61	GC06P200733	43.3433	https://www.genecards.org/cgi-bin/carddisp.pl?gene=ARG1
GPC3	Glypican 3	Protein Coding	P51654	58	GC0XM133535	43.3217	https://www.genecards.org/cgi-bin/carddisp.pl?gene=GPC3
F5	Coagulation Factor V	Protein Coding	P12259	59	GC01M169511	43.3171	https://www.genecards.org/cgi-bin/carddisp.pl?gene=F5
DNAJB6	DnaJ Heat Shock Protein Family (Hsp40) Member B6	Protein Coding	O75190	52	GC07P157335	43.2879	https://www.genecards.org/cgi-bin/carddisp.pl?gene=DNAJB6
LRP2	LDL Receptor Related Protein 2	Protein Coding	P98164	61	GC02M169127	43.287	https://www.genecards.org/cgi-bin/carddisp.pl?gene=LRP2
PLA2G2A	Phospholipase A2 Group IIA	Protein Coding	P14555	60	GC01M019975	43.2869	https://www.genecards.org/cgi-bin/carddisp.pl?gene=PLA2G2A
SST	Somatostatin	Protein Coding	P61278	54	GC03M187668	43.2503	https://www.genecards.org/cgi-bin/carddisp.pl?gene=SST
GAMT	Guanidinoacetate N-Methyltransferase	Protein Coding	Q14353	59	GC19M001397	43.2485	https://www.genecards.org/cgi-bin/carddisp.pl?gene=GAMT
SPINT2	Serine Peptidase Inhibitor, Kunitz Type 2	Protein Coding	O43291	54	GC19P038244	43.2385	https://www.genecards.org/cgi-bin/carddisp.pl?gene=SPINT2
PNLIPRP2	Pancreatic Lipase Related Protein 2 (Gene/Pseudogene)	Protein Coding	P54317	41	GC10P116620	43.1856	https://www.genecards.org/cgi-bin/carddisp.pl?gene=PNLIPRP2
CALM2	Calmodulin 2	Protein Coding	P0DP24	55	GC02M047160	43.1309	https://www.genecards.org/cgi-bin/carddisp.pl?gene=CALM2
TGFB3	Transforming Growth Factor Beta 3	Protein Coding	P10600	59	GC14M075958	43.1248	https://www.genecards.org/cgi-bin/carddisp.pl?gene=TGFB3
IFNA2	Interferon Alpha 2	Protein Coding	P01563	57	GC09M021384	43.1031	https://www.genecards.org/cgi-bin/carddisp.pl?gene=IFNA2
RAB3GAP2	RAB3 GTPase Activating Non-Catalytic Protein Subunit 2	Protein Coding	Q9H2M9	51	GC01M220296	43.0893	https://www.genecards.org/cgi-bin/carddisp.pl?gene=RAB3GAP2
CXCR2	C-X-C Motif Chemokine Receptor 2	Protein Coding	P25025	63	GC02P218125	43.0563	https://www.genecards.org/cgi-bin/carddisp.pl?gene=CXCR2
RNASEH2B	Ribonuclease H2 Subunit B	Protein Coding	Q5TBB1	48	GC13P050909	43.0418	https://www.genecards.org/cgi-bin/carddisp.pl?gene=RNASEH2B
ITGB1	Integrin Subunit Beta 1	Protein Coding	P05556	63	GC10M037978	42.9991	https://www.genecards.org/cgi-bin/carddisp.pl?gene=ITGB1
CHKB	Choline Kinase Beta	Protein Coding	Q9Y259	58	GC22M050578	42.9599	https://www.genecards.org/cgi-bin/carddisp.pl?gene=CHKB
GJC2	Gap Junction Protein Gamma 2	Protein Coding	Q5T442	53	GC01P234327	42.9492	https://www.genecards.org/cgi-bin/carddisp.pl?gene=GJC2
ACADS	Acyl-CoA Dehydrogenase Short Chain	Protein Coding	P16219	58	GC12P141793	42.9307	https://www.genecards.org/cgi-bin/carddisp.pl?gene=ACADS
TPM3	Tropomyosin 3	Protein Coding	P06753	58	GC01M154155	42.9197	https://www.genecards.org/cgi-bin/carddisp.pl?gene=TPM3
PRKCB	Protein Kinase C Beta	Protein Coding	P05771	63	GC16P136500	42.9147	https://www.genecards.org/cgi-bin/carddisp.pl?gene=PRKCB
SOCS3	Suppressor Of Cytokine Signaling 3	Protein Coding	O14543	57	GC17M078356	42.9128	https://www.genecards.org/cgi-bin/carddisp.pl?gene=SOCS3
CSF2	Colony Stimulating Factor 2	Protein Coding	P04141	58	GC05P132073	42.9104	https://www.genecards.org/cgi-bin/carddisp.pl?gene=CSF2
PLB1	Phospholipase B1	Protein Coding	Q6P1J6	49	GC02P030817	42.9099	https://www.genecards.org/cgi-bin/carddisp.pl?gene=PLB1
CTSK	Cathepsin K	Protein Coding	P43235	61	GC01M169599	42.8999	https://www.genecards.org/cgi-bin/carddisp.pl?gene=CTSK
PRKACA	Protein Kinase CAMP-Activated Catalytic Subunit Alpha	Protein Coding	P17612	65	GC19M115794	42.8932	https://www.genecards.org/cgi-bin/carddisp.pl?gene=PRKACA
MATR3	Matrin 3	Protein Coding	P43243	54	GC05P162492	42.843	https://www.genecards.org/cgi-bin/carddisp.pl?gene=MATR3
MPV17	Mitochondrial Inner Membrane Protein MPV17	Protein Coding	P39210	52	GC02M027309	42.7787	https://www.genecards.org/cgi-bin/carddisp.pl?gene=MPV17
POMK	Protein O-Mannose Kinase	Protein Coding	Q9H5K3	48	GC08P043093	42.7722	https://www.genecards.org/cgi-bin/carddisp.pl?gene=POMK
CHRNA1	Cholinergic Receptor Nicotinic Alpha 1 Subunit	Protein Coding	P02708	58	GC02M174747	42.7682	https://www.genecards.org/cgi-bin/carddisp.pl?gene=CHRNA1
CA2	Carbonic Anhydrase 2	Protein Coding	P00918	63	GC08P085463	42.7676	https://www.genecards.org/cgi-bin/carddisp.pl?gene=CA2
STIM1	Stromal Interaction Molecule 1	Protein Coding	Q13586	62	GC11P024861	42.7648	https://www.genecards.org/cgi-bin/carddisp.pl?gene=STIM1
PRKAA2	Protein Kinase AMP-Activated Catalytic Subunit Alpha 2	Protein Coding	P54646	61	GC01P056645	42.761	https://www.genecards.org/cgi-bin/carddisp.pl?gene=PRKAA2
DOLK	Dolichol Kinase	Protein Coding	Q9UPQ8	51	GC09M128945	42.7347	https://www.genecards.org/cgi-bin/carddisp.pl?gene=DOLK
PIK3C3	Phosphatidylinositol 3-Kinase Catalytic Subunit Type 3	Protein Coding	Q8NEB9	62	GC18P041955	42.7149	https://www.genecards.org/cgi-bin/carddisp.pl?gene=PIK3C3
IKBKG	Inhibitor Of Nuclear Factor Kappa B Kinase Regulatory Subunit Gamma	Protein Coding	Q9Y6K9	60	GC0XP154541	42.7	https://www.genecards.org/cgi-bin/carddisp.pl?gene=IKBKG
MAFA	MAF BZIP Transcription Factor A	Protein Coding	Q8NHW3	52	GC08M143419	42.6956	https://www.genecards.org/cgi-bin/carddisp.pl?gene=MAFA
PDE6B	Phosphodiesterase 6B	Protein Coding	P35913	57	GC04P033696	42.6651	https://www.genecards.org/cgi-bin/carddisp.pl?gene=PDE6B
CLCN5	Chloride Voltage-Gated Channel 5	Protein Coding	P51795	55	GC0XP049922	42.6406	https://www.genecards.org/cgi-bin/carddisp.pl?gene=CLCN5
CYCS	Cytochrome C, Somatic	Protein Coding	P99999	59	GC07M025118	42.628	https://www.genecards.org/cgi-bin/carddisp.pl?gene=CYCS
TNNI3	Troponin I3, Cardiac Type	Protein Coding	P19429	61	GC19M055151	42.5947	https://www.genecards.org/cgi-bin/carddisp.pl?gene=TNNI3
PEX1	Peroxisomal Biogenesis Factor 1	Protein Coding	O43933	57	GC07M092487	42.5644	https://www.genecards.org/cgi-bin/carddisp.pl?gene=PEX1
PDGFRA	Platelet Derived Growth Factor Receptor Alpha	Protein Coding	P16234	66	GC04P054229	42.5531	https://www.genecards.org/cgi-bin/carddisp.pl?gene=PDGFRA
ACVR2B	Activin A Receptor Type 2B	Protein Coding	Q13705	62	GC03P038453	42.5523	https://www.genecards.org/cgi-bin/carddisp.pl?gene=ACVR2B
PYCR1	Pyrroline-5-Carboxylate Reductase 1	Protein Coding	P32322	57	GC17M081932	42.5515	https://www.genecards.org/cgi-bin/carddisp.pl?gene=PYCR1
HLA-C	Major Histocompatibility Complex, Class I, C	Protein Coding	P10321	57	GC06M114918	42.5349	https://www.genecards.org/cgi-bin/carddisp.pl?gene=HLA-C
PIK3CD	Phosphatidylinositol-4,5-Bisphosphate 3-Kinase Catalytic Subunit Delta	Protein Coding	O00329	66	GC01P091801	42.5288	https://www.genecards.org/cgi-bin/carddisp.pl?gene=PIK3CD
TNFSF10	TNF Superfamily Member 10	Protein Coding	P50591	58	GC03M172505	42.5145	https://www.genecards.org/cgi-bin/carddisp.pl?gene=TNFSF10
GPT	Glutamic--Pyruvic Transaminase	Protein Coding	P24298	55	GC08P144502	42.5109	https://www.genecards.org/cgi-bin/carddisp.pl?gene=GPT
TNFAIP3	TNF Alpha Induced Protein 3	Protein Coding	P21580	61	GC06P137866	42.5058	https://www.genecards.org/cgi-bin/carddisp.pl?gene=TNFAIP3
RETREG1	Reticulophagy Regulator 1	Protein Coding	Q9H6L5	48	GC05M016691	42.4783	https://www.genecards.org/cgi-bin/carddisp.pl?gene=RETREG1
ESR2	Estrogen Receptor 2	Protein Coding	Q92731	61	GC14M064084	42.4562	https://www.genecards.org/cgi-bin/carddisp.pl?gene=ESR2
FTH1	Ferritin Heavy Chain 1	Protein Coding	P02794	63	GC11M061959	42.4512	https://www.genecards.org/cgi-bin/carddisp.pl?gene=FTH1
NTRK2	Neurotrophic Receptor Tyrosine Kinase 2	Protein Coding	Q16620	66	GC09P084668	42.4273	https://www.genecards.org/cgi-bin/carddisp.pl?gene=NTRK2
GJB1	Gap Junction Protein Beta 1	Protein Coding	P08034	60	GC0XP071212	42.3798	https://www.genecards.org/cgi-bin/carddisp.pl?gene=GJB1
LTA	Lymphotoxin Alpha	Protein Coding	P01374	54	GC06P199526	42.3647	https://www.genecards.org/cgi-bin/carddisp.pl?gene=LTA
MC1R	Melanocortin 1 Receptor	Protein Coding	Q01726	60	GC16P089912	42.3527	https://www.genecards.org/cgi-bin/carddisp.pl?gene=MC1R
ADIPOR1	Adiponectin Receptor 1	Protein Coding	Q96A54	57	GC01M202940	42.3239	https://www.genecards.org/cgi-bin/carddisp.pl?gene=ADIPOR1
WDR35	WD Repeat Domain 35	Protein Coding	Q9P2L0	51	GC02M019910	42.297	https://www.genecards.org/cgi-bin/carddisp.pl?gene=WDR35
NKX2-5	NK2 Homeobox 5	Protein Coding	P52952	57	GC05M173232	42.2953	https://www.genecards.org/cgi-bin/carddisp.pl?gene=NKX2-5
ABCC9	ATP Binding Cassette Subfamily C Member 9	Protein Coding	O60706	57	GC12M021797	42.2582	https://www.genecards.org/cgi-bin/carddisp.pl?gene=ABCC9
IL7R	Interleukin 7 Receptor	Protein Coding	P16871	59	GC05P035852	42.2508	https://www.genecards.org/cgi-bin/carddisp.pl?gene=IL7R
COG7	Component Of Oligomeric Golgi Complex 7	Protein Coding	P83436	50	GC16M023388	42.2443	https://www.genecards.org/cgi-bin/carddisp.pl?gene=COG7
SMARCB1	SWI/SNF Related BAF Chromatin Remodeling Complex Subunit B1	Protein Coding	Q12824	58	GC22P023786	42.2251	https://www.genecards.org/cgi-bin/carddisp.pl?gene=SMARCB1
KCTD7	Potassium Channel Tetramerization Domain Containing 7	Protein Coding	Q96MP8	49	GC07P066628	42.2173	https://www.genecards.org/cgi-bin/carddisp.pl?gene=KCTD7
KIF5A	Kinesin Family Member 5A	Protein Coding	Q12840	58	GC12P087099	42.2161	https://www.genecards.org/cgi-bin/carddisp.pl?gene=KIF5A
ACAD9	Acyl-CoA Dehydrogenase Family Member 9	Protein Coding	Q9H845	57	GC03P145150	42.2115	https://www.genecards.org/cgi-bin/carddisp.pl?gene=ACAD9
THBD	Thrombomodulin	Protein Coding	P07204	58	GC20M023026	42.2093	https://www.genecards.org/cgi-bin/carddisp.pl?gene=THBD
GCKR	Glucokinase Regulator	Protein Coding	Q14397	51	GC02P027496	42.2087	https://www.genecards.org/cgi-bin/carddisp.pl?gene=GCKR
FXYD2	FXYD Domain Containing Ion Transport Regulator 2	Protein Coding	P54710	54	GC11M117800	42.2043	https://www.genecards.org/cgi-bin/carddisp.pl?gene=FXYD2
RARRES2	Retinoic Acid Receptor Responder 2	Protein Coding	Q99969	51	GC07M150333	42.1984	https://www.genecards.org/cgi-bin/carddisp.pl?gene=RARRES2
CLRN1	Clarin 1	Protein Coding	P58418	45	GC03M150926	42.1877	https://www.genecards.org/cgi-bin/carddisp.pl?gene=CLRN1
SLC16A1	Solute Carrier Family 16 Member 1	Protein Coding	P53985	60	GC01M113185	42.176	https://www.genecards.org/cgi-bin/carddisp.pl?gene=SLC16A1
EDN3	Endothelin 3	Protein Coding	P14138	59	GC20P059300	42.1564	https://www.genecards.org/cgi-bin/carddisp.pl?gene=EDN3
PIK3CB	Phosphatidylinositol-4,5-Bisphosphate 3-Kinase Catalytic Subunit Beta	Protein Coding	P42338	61	GC03M138652	42.1539	https://www.genecards.org/cgi-bin/carddisp.pl?gene=PIK3CB
NR1H2	Nuclear Receptor Subfamily 1 Group H Member 2	Protein Coding	P55055	59	GC19P050329	42.1455	https://www.genecards.org/cgi-bin/carddisp.pl?gene=NR1H2
DNMT3A	DNA Methyltransferase 3 Alpha	Protein Coding	Q9Y6K1	65	GC02M025228	42.0829	https://www.genecards.org/cgi-bin/carddisp.pl?gene=DNMT3A
DYNC2H1	Dynein Cytoplasmic 2 Heavy Chain 1	Protein Coding	Q8NCM8	51	GC11P103109	42.0592	https://www.genecards.org/cgi-bin/carddisp.pl?gene=DYNC2H1
SLC22A5	Solute Carrier Family 22 Member 5	Protein Coding	O76082	59	GC05P132369	42.0259	https://www.genecards.org/cgi-bin/carddisp.pl?gene=SLC22A5
ARRB2	Arrestin Beta 2	Protein Coding	P32121	57	GC17P174403	41.9956	https://www.genecards.org/cgi-bin/carddisp.pl?gene=ARRB2
GPAT3	Glycerol-3-Phosphate Acyltransferase 3	Protein Coding	Q53EU6	50	GC04P083866	41.99	https://www.genecards.org/cgi-bin/carddisp.pl?gene=GPAT3
AP2S1	Adaptor Related Protein Complex 2 Subunit Sigma 1	Protein Coding	P53680	54	GC19M046838	41.9878	https://www.genecards.org/cgi-bin/carddisp.pl?gene=AP2S1
MMUT	Methylmalonyl-CoA Mutase	Protein Coding	P22033	58	GC06M049430	41.9705	https://www.genecards.org/cgi-bin/carddisp.pl?gene=MMUT
PKP2	Plakophilin 2	Protein Coding	Q99959	55	GC12M032790	41.9284	https://www.genecards.org/cgi-bin/carddisp.pl?gene=PKP2
MIAT	Myocardial Infarction Associated Transcript	RNA Gene		32	GC22P026646	41.8949	https://www.genecards.org/cgi-bin/carddisp.pl?gene=MIAT
MYCN	MYCN Proto-Oncogene, BHLH Transcription Factor	Protein Coding	P04198	58	GC02P016074	41.891	https://www.genecards.org/cgi-bin/carddisp.pl?gene=MYCN
SYNE2	Spectrin Repeat Containing Nuclear Envelope Protein 2	Protein Coding	Q8WXH0	51	GC14P063761	41.8795	https://www.genecards.org/cgi-bin/carddisp.pl?gene=SYNE2
HMGB1	High Mobility Group Box 1	Protein Coding	P09429	63	GC13M030456	41.8347	https://www.genecards.org/cgi-bin/carddisp.pl?gene=HMGB1
SAMHD1	SAM And HD Domain Containing Deoxynucleoside Triphosphate Triphosphohydrolase 1	Protein Coding	Q9Y3Z3	54	GC20M038220	41.8087	https://www.genecards.org/cgi-bin/carddisp.pl?gene=SAMHD1
RIGI	RNA Sensor RIG-I	Protein Coding	O95786	60	GC09M032577	41.8037	https://www.genecards.org/cgi-bin/carddisp.pl?gene=RIGI
MCL1	MCL1 Apoptosis Regulator, BCL2 Family Member	Protein Coding	Q07820	62	GC01M169571	41.8	https://www.genecards.org/cgi-bin/carddisp.pl?gene=MCL1
PRSS1	Serine Protease 1	Protein Coding	P07477	57	GC07P170526	41.7966	https://www.genecards.org/cgi-bin/carddisp.pl?gene=PRSS1
INVS	Inversin	Protein Coding	Q9Y283	56	GC09P159959	41.7827	https://www.genecards.org/cgi-bin/carddisp.pl?gene=INVS
ANGPTL3	Angiopoietin Like 3	Protein Coding	Q9Y5C1	59	GC01P062597	41.7749	https://www.genecards.org/cgi-bin/carddisp.pl?gene=ANGPTL3
CDKN3	Cyclin Dependent Kinase Inhibitor 3	Protein Coding	Q16667	54	GC14P066396	41.7283	https://www.genecards.org/cgi-bin/carddisp.pl?gene=CDKN3
ATF6	Activating Transcription Factor 6	Protein Coding	P18850	61	GC01P161766	41.7139	https://www.genecards.org/cgi-bin/carddisp.pl?gene=ATF6
IL6ST	Interleukin 6 Cytokine Family Signal Transducer	Protein Coding	P40189	63	GC05M055935	41.6746	https://www.genecards.org/cgi-bin/carddisp.pl?gene=IL6ST
PIK3C2A	Phosphatidylinositol-4-Phosphate 3-Kinase Catalytic Subunit Type 2 Alpha	Protein Coding	O00443	60	GC11M018556	41.6334	https://www.genecards.org/cgi-bin/carddisp.pl?gene=PIK3C2A
DRD2	Dopamine Receptor D2	Protein Coding	P14416	63	GC11M113409	41.6171	https://www.genecards.org/cgi-bin/carddisp.pl?gene=DRD2
NOS1	Nitric Oxide Synthase 1	Protein Coding	P29475	63	GC12M117208	41.5872	https://www.genecards.org/cgi-bin/carddisp.pl?gene=NOS1
APOA2	Apolipoprotein A2	Protein Coding	P02652	57	GC01M161222	41.5803	https://www.genecards.org/cgi-bin/carddisp.pl?gene=APOA2
UBE3A	Ubiquitin Protein Ligase E3A	Protein Coding	Q05086	60	GC15M025333	41.5449	https://www.genecards.org/cgi-bin/carddisp.pl?gene=UBE3A
TEK	TEK Receptor Tyrosine Kinase	Protein Coding	Q02763	64	GC09P027109	41.5088	https://www.genecards.org/cgi-bin/carddisp.pl?gene=TEK
PNPLA6	Patatin Like Domain 6, Lysophospholipase	Protein Coding	Q8IY17	55	GC19P007534	41.5068	https://www.genecards.org/cgi-bin/carddisp.pl?gene=PNPLA6
AKT3	AKT Serine/Threonine Kinase 3	Protein Coding	Q9Y243	68	GC01M243488	41.4915	https://www.genecards.org/cgi-bin/carddisp.pl?gene=AKT3
PPIB	Peptidylprolyl Isomerase B	Protein Coding	P23284	60	GC15M064155	41.3825	https://www.genecards.org/cgi-bin/carddisp.pl?gene=PPIB
IL17A	Interleukin 17A	Protein Coding	Q16552	55	GC06P052186	41.326	https://www.genecards.org/cgi-bin/carddisp.pl?gene=IL17A
CD44	CD44 Molecule (IN Blood Group)	Protein Coding	P16070	61	GC11P035139	41.3142	https://www.genecards.org/cgi-bin/carddisp.pl?gene=CD44
MYH3	Myosin Heavy Chain 3	Protein Coding	P11055	56	GC17M010628	41.3117	https://www.genecards.org/cgi-bin/carddisp.pl?gene=MYH3
G6PC2	Glucose-6-Phosphatase Catalytic Subunit 2	Protein Coding	Q9NQR9	48	GC02P168901	41.2995	https://www.genecards.org/cgi-bin/carddisp.pl?gene=G6PC2
F3	Coagulation Factor III, Tissue Factor	Protein Coding	P13726	58	GC01M095143	41.2916	https://www.genecards.org/cgi-bin/carddisp.pl?gene=F3
ITPR2	Inositol 1,4,5-Trisphosphate Receptor Type 2	Protein Coding	Q14571	57	GC12M039237	41.2495	https://www.genecards.org/cgi-bin/carddisp.pl?gene=ITPR2
COL6A3	Collagen Type VI Alpha 3 Chain	Protein Coding	P12111	57	GC02M237324	41.2424	https://www.genecards.org/cgi-bin/carddisp.pl?gene=COL6A3
BAP1	BRCA1 Associated Deubiquitinase 1	Protein Coding	Q92560	59	GC03M052401	41.2413	https://www.genecards.org/cgi-bin/carddisp.pl?gene=BAP1
MYD88	MYD88 Innate Immune Signal Transduction Adaptor	Protein Coding	Q99836	61	GC03P068693	41.2335	https://www.genecards.org/cgi-bin/carddisp.pl?gene=MYD88
ALG9	ALG9 Alpha-1,2-Mannosyltransferase	Protein Coding	Q9H6U8	52	GC11M146916	41.2156	https://www.genecards.org/cgi-bin/carddisp.pl?gene=ALG9
ROBO2	Roundabout Guidance Receptor 2	Protein Coding	Q9HCK4	55	GC03P076080	41.2049	https://www.genecards.org/cgi-bin/carddisp.pl?gene=ROBO2
ACTB	Actin Beta	Protein Coding	P60709	63	GC07M005984	41.1563	https://www.genecards.org/cgi-bin/carddisp.pl?gene=ACTB
IL13	Interleukin 13	Protein Coding	P35225	56	GC05P132656	41.1543	https://www.genecards.org/cgi-bin/carddisp.pl?gene=IL13
KRT1	Keratin 1	Protein Coding	P04264	60	GC12M052674	41.1452	https://www.genecards.org/cgi-bin/carddisp.pl?gene=KRT1
COG1	Component Of Oligomeric Golgi Complex 1	Protein Coding	Q8WTW3	50	GC17P073193	41.1344	https://www.genecards.org/cgi-bin/carddisp.pl?gene=COG1
SOCS1	Suppressor Of Cytokine Signaling 1	Protein Coding	O15524	58	GC16M055516	41.1238	https://www.genecards.org/cgi-bin/carddisp.pl?gene=SOCS1
SERPINB2	Serpin Family B Member 2	Protein Coding	P05120	57	GC18P063871	41.0995	https://www.genecards.org/cgi-bin/carddisp.pl?gene=SERPINB2
CYP11B1	Cytochrome P450 Family 11 Subfamily B Member 1	Protein Coding	P15538	58	GC08M147698	41.0869	https://www.genecards.org/cgi-bin/carddisp.pl?gene=CYP11B1
RHOA	Ras Homolog Family Member A	Protein Coding	P61586	62	GC03M049359	41.0862	https://www.genecards.org/cgi-bin/carddisp.pl?gene=RHOA
CPLANE1	Ciliogenesis And Planar Polarity Effector Complex Subunit 1	Protein Coding	Q9H799	45	GC05M039228	41.0833	https://www.genecards.org/cgi-bin/carddisp.pl?gene=CPLANE1
PTPN3	Protein Tyrosine Phosphatase Non-Receptor Type 3	Protein Coding	P26045	54	GC09M109375	41.0613	https://www.genecards.org/cgi-bin/carddisp.pl?gene=PTPN3
CHRND	Cholinergic Receptor Nicotinic Delta Subunit	Protein Coding	Q07001	55	GC02P232525	41.0118	https://www.genecards.org/cgi-bin/carddisp.pl?gene=CHRND
ITCH	Itchy E3 Ubiquitin Protein Ligase	Protein Coding	Q96J02	60	GC20P034363	41.0028	https://www.genecards.org/cgi-bin/carddisp.pl?gene=ITCH
APOH	Apolipoprotein H	Protein Coding	P02749	58	GC17M105423	40.9956	https://www.genecards.org/cgi-bin/carddisp.pl?gene=APOH
SNAI2	Snail Family Transcriptional Repressor 2	Protein Coding	O43623	55	GC08M048917	40.9856	https://www.genecards.org/cgi-bin/carddisp.pl?gene=SNAI2
MYO5B	Myosin VB	Protein Coding	Q9ULV0	54	GC18M049822	40.9694	https://www.genecards.org/cgi-bin/carddisp.pl?gene=MYO5B
BIRC5	Baculoviral IAP Repeat Containing 5	Protein Coding	O15392	58	GC17P078214	40.9641	https://www.genecards.org/cgi-bin/carddisp.pl?gene=BIRC5
ASTN2	Astrotactin 2	Protein Coding	O75129	50	GC09M134428	40.9575	https://www.genecards.org/cgi-bin/carddisp.pl?gene=ASTN2
SOS1	SOS Ras/Rac Guanine Nucleotide Exchange Factor 1	Protein Coding	Q07889	64	GC02M039517	40.941	https://www.genecards.org/cgi-bin/carddisp.pl?gene=SOS1
MEGF8	Multiple EGF Like Domains 8	Protein Coding	Q7Z7M0	47	GC19P042325	40.929	https://www.genecards.org/cgi-bin/carddisp.pl?gene=MEGF8
FURIN	Furin, Paired Basic Amino Acid Cleaving Enzyme	Protein Coding	P09958	61	GC15P090868	40.9194	https://www.genecards.org/cgi-bin/carddisp.pl?gene=FURIN
SERPING1	Serpin Family G Member 1	Protein Coding	P05155	58	GC11P057597	40.8804	https://www.genecards.org/cgi-bin/carddisp.pl?gene=SERPING1
SLC1A3	Solute Carrier Family 1 Member 3	Protein Coding	P43003	61	GC05P036764	40.8741	https://www.genecards.org/cgi-bin/carddisp.pl?gene=SLC1A3
ACVR1B	Activin A Receptor Type 1B	Protein Coding	P36896	60	GC12P051951	40.8564	https://www.genecards.org/cgi-bin/carddisp.pl?gene=ACVR1B
B4GALT1	Beta-1,4-Galactosyltransferase 1	Protein Coding	P15291	58	GC09M033100	40.751	https://www.genecards.org/cgi-bin/carddisp.pl?gene=B4GALT1
CNR1	Cannabinoid Receptor 1	Protein Coding	P21554	58	GC06M088139	40.7508	https://www.genecards.org/cgi-bin/carddisp.pl?gene=CNR1
PCNA	Proliferating Cell Nuclear Antigen	Protein Coding	P12004	63	GC20M005114	40.7488	https://www.genecards.org/cgi-bin/carddisp.pl?gene=PCNA
GPT2	Glutamic--Pyruvic Transaminase 2	Protein Coding	Q8TD30	58	GC16P137110	40.7142	https://www.genecards.org/cgi-bin/carddisp.pl?gene=GPT2
FABP4	Fatty Acid Binding Protein 4	Protein Coding	P15090	56	GC08M081478	40.6906	https://www.genecards.org/cgi-bin/carddisp.pl?gene=FABP4
REEP1	Receptor Accessory Protein 1	Protein Coding	Q9H902	51	GC02M086213	40.689	https://www.genecards.org/cgi-bin/carddisp.pl?gene=REEP1
STUB1	STIP1 Homology And U-Box Containing Protein 1	Protein Coding	Q9UNE7	57	GC16P135885	40.6357	https://www.genecards.org/cgi-bin/carddisp.pl?gene=STUB1
PHOX2B	Paired Like Homeobox 2B	Protein Coding	Q99453	56	GC04M041746	40.627	https://www.genecards.org/cgi-bin/carddisp.pl?gene=PHOX2B
SCN8A	Sodium Voltage-Gated Channel Alpha Subunit 8	Protein Coding	Q9UQD0	62	GC12P051590	40.6014	https://www.genecards.org/cgi-bin/carddisp.pl?gene=SCN8A
SLC25A1	Solute Carrier Family 25 Member 1	Protein Coding	P53007	58	GC22M090199	40.5658	https://www.genecards.org/cgi-bin/carddisp.pl?gene=SLC25A1
RRM2B	Ribonucleotide Reductase Regulatory TP53 Inducible Subunit M2B	Protein Coding	Q7LG56	61	GC08M102204	40.5336	https://www.genecards.org/cgi-bin/carddisp.pl?gene=RRM2B
ADIPOR2	Adiponectin Receptor 2	Protein Coding	Q86V24	54	GC12P001670	40.5145	https://www.genecards.org/cgi-bin/carddisp.pl?gene=ADIPOR2
PDE3B	Phosphodiesterase 3B	Protein Coding	Q13370	57	GC11P014643	40.5111	https://www.genecards.org/cgi-bin/carddisp.pl?gene=PDE3B
CALCA	Calcitonin Related Polypeptide Alpha	Protein Coding	P06881	56	GC11M014966	40.4663	https://www.genecards.org/cgi-bin/carddisp.pl?gene=CALCA
AXIN2	Axin 2	Protein Coding	Q9Y2T1	62	GC17M065528	40.4611	https://www.genecards.org/cgi-bin/carddisp.pl?gene=AXIN2
ACVR2A	Activin A Receptor Type 2A	Protein Coding	P27037	59	GC02P147844	40.451	https://www.genecards.org/cgi-bin/carddisp.pl?gene=ACVR2A
LIMS2	LIM Zinc Finger Domain Containing 2	Protein Coding	Q7Z4I7	51	GC02M127638	40.436	https://www.genecards.org/cgi-bin/carddisp.pl?gene=LIMS2
FH	Fumarate Hydratase	Protein Coding	P07954	59	GC01M241499	40.4288	https://www.genecards.org/cgi-bin/carddisp.pl?gene=FH
COL6A1	Collagen Type VI Alpha 1 Chain	Protein Coding	P12109	58	GC21P045981	40.4199	https://www.genecards.org/cgi-bin/carddisp.pl?gene=COL6A1
ACP1	Acid Phosphatase 1	Protein Coding	P24666	55	GC02P001440	40.4167	https://www.genecards.org/cgi-bin/carddisp.pl?gene=ACP1
LRBA	LPS Responsive Beige-Like Anchor Protein	Protein Coding	P50851	52	GC04M150264	40.3721	https://www.genecards.org/cgi-bin/carddisp.pl?gene=LRBA
HCN4	Hyperpolarization Activated Cyclic Nucleotide Gated Potassium Channel 4	Protein Coding	Q9Y3Q4	59	GC15M073319	40.3485	https://www.genecards.org/cgi-bin/carddisp.pl?gene=HCN4
SPTBN2	Spectrin Beta, Non-Erythrocytic 2	Protein Coding	O15020	54	GC11M146255	40.3452	https://www.genecards.org/cgi-bin/carddisp.pl?gene=SPTBN2
SIX3	SIX Homeobox 3	Protein Coding	O95343	53	GC02P044941	40.3264	https://www.genecards.org/cgi-bin/carddisp.pl?gene=SIX3
ATP1A3	ATPase Na+/K+ Transporting Subunit Alpha 3	Protein Coding	P13637	60	GC19M041966	40.3073	https://www.genecards.org/cgi-bin/carddisp.pl?gene=ATP1A3
HSP90AA1	Heat Shock Protein 90 Alpha Family Class A Member 1	Protein Coding	P07900	64	GC14M102080	40.3042	https://www.genecards.org/cgi-bin/carddisp.pl?gene=HSP90AA1
GSTP1	Glutathione S-Transferase Pi 1	Protein Coding	P09211	63	GC11P067583	40.2599	https://www.genecards.org/cgi-bin/carddisp.pl?gene=GSTP1
SLC45A2	Solute Carrier Family 45 Member 2	Protein Coding	Q9UMX9	52	GC05M033944	40.2477	https://www.genecards.org/cgi-bin/carddisp.pl?gene=SLC45A2
ZBTB24	Zinc Finger And BTB Domain Containing 24	Protein Coding	O43167	47	GC06M115914	40.2394	https://www.genecards.org/cgi-bin/carddisp.pl?gene=ZBTB24
SP1	Sp1 Transcription Factor	Protein Coding	P08047	60	GC12P053380	40.2214	https://www.genecards.org/cgi-bin/carddisp.pl?gene=SP1
PNKP	Polynucleotide Kinase 3''-Phosphatase	Protein Coding	Q96T60	58	GC19M116592	40.2066	https://www.genecards.org/cgi-bin/carddisp.pl?gene=PNKP
WNT5A	Wnt Family Member 5A	Protein Coding	P41221	63	GC03M055465	40.1816	https://www.genecards.org/cgi-bin/carddisp.pl?gene=WNT5A
SRD5A3	Steroid 5 Alpha-Reductase 3	Protein Coding	Q9H8P0	53	GC04P055346	40.168	https://www.genecards.org/cgi-bin/carddisp.pl?gene=SRD5A3
CELA2A	Chymotrypsin Like Elastase 2A	Protein Coding	P08217	55	GC01P015456	40.1495	https://www.genecards.org/cgi-bin/carddisp.pl?gene=CELA2A
GAPDH	Glyceraldehyde-3-Phosphate Dehydrogenase	Protein Coding	P04406	64	GC12P085713	40.0984	https://www.genecards.org/cgi-bin/carddisp.pl?gene=GAPDH
XYLT1	Xylosyltransferase 1	Protein Coding	Q86Y38	57	GC16M017101	40.06	https://www.genecards.org/cgi-bin/carddisp.pl?gene=XYLT1
MAPK10	Mitogen-Activated Protein Kinase 10	Protein Coding	P53779	59	GC04M085990	40.0301	https://www.genecards.org/cgi-bin/carddisp.pl?gene=MAPK10
USH1G	USH1 Protein Network Component Sans	Protein Coding	Q495M9	50	GC17M074916	39.9662	https://www.genecards.org/cgi-bin/carddisp.pl?gene=USH1G
BAG3	BAG Cochaperone 3	Protein Coding	O95817	55	GC10P135309	39.9574	https://www.genecards.org/cgi-bin/carddisp.pl?gene=BAG3
RFT1	RFT1 Glycolipid Translocator Homolog	Protein Coding	Q96AA3	50	GC03M055459	39.9493	https://www.genecards.org/cgi-bin/carddisp.pl?gene=RFT1
TREX1	Three Prime Repair Exonuclease 1	Protein Coding	Q9NSU2	55	GC03P069223	39.9491	https://www.genecards.org/cgi-bin/carddisp.pl?gene=TREX1
RMRP	RNA Component Of Mitochondrial RNA Processing Endoribonuclease	RNA Gene		30	GC09M037265	39.9345	https://www.genecards.org/cgi-bin/carddisp.pl?gene=RMRP
PRKCZ	Protein Kinase C Zeta	Protein Coding	Q05513	61	GC01P091475	39.9299	https://www.genecards.org/cgi-bin/carddisp.pl?gene=PRKCZ
GDF15	Growth Differentiation Factor 15	Protein Coding	Q99988	56	GC19P171233	39.9105	https://www.genecards.org/cgi-bin/carddisp.pl?gene=GDF15
S100B	S100 Calcium Binding Protein B	Protein Coding	P04271	58	GC21M055662	39.8913	https://www.genecards.org/cgi-bin/carddisp.pl?gene=S100B
CRX	Cone-Rod Homeobox	Protein Coding	O43186	52	GC19P047819	39.8846	https://www.genecards.org/cgi-bin/carddisp.pl?gene=CRX
SMAD9	SMAD Family Member 9	Protein Coding	O15198	58	GC13M036844	39.884	https://www.genecards.org/cgi-bin/carddisp.pl?gene=SMAD9
LRP6	LDL Receptor Related Protein 6	Protein Coding	O75581	59	GC12M038973	39.8755	https://www.genecards.org/cgi-bin/carddisp.pl?gene=LRP6
VIM	Vimentin	Protein Coding	P08670	63	GC10P017227	39.8515	https://www.genecards.org/cgi-bin/carddisp.pl?gene=VIM
CLPB	ClpB Family Mitochondrial Disaggregase	Protein Coding	Q9H078	55	GC11M146396	39.8392	https://www.genecards.org/cgi-bin/carddisp.pl?gene=CLPB
GGT1	Gamma-Glutamyltransferase 1	Protein Coding	P19440	62	GC22P024583	39.8116	https://www.genecards.org/cgi-bin/carddisp.pl?gene=GGT1
SLCO1B3	Solute Carrier Organic Anion Transporter Family Member 1B3	Protein Coding	Q9NPD5	57	GC12P020810	39.7983	https://www.genecards.org/cgi-bin/carddisp.pl?gene=SLCO1B3
POLE	DNA Polymerase Epsilon, Catalytic Subunit	Protein Coding	Q07864	60	GC12M132852	39.793	https://www.genecards.org/cgi-bin/carddisp.pl?gene=POLE
IFNB1	Interferon Beta 1	Protein Coding	P01574	55	GC09M021077	39.7428	https://www.genecards.org/cgi-bin/carddisp.pl?gene=IFNB1
HNRNPA2B1	Heterogeneous Nuclear Ribonucleoprotein A2/B1	Protein Coding	P22626	58	GC07M026174	39.7119	https://www.genecards.org/cgi-bin/carddisp.pl?gene=HNRNPA2B1
AARS2	Alanyl-TRNA Synthetase 2, Mitochondrial	Protein Coding	Q5JTZ9	55	GC06M115216	39.6969	https://www.genecards.org/cgi-bin/carddisp.pl?gene=AARS2
NDUFS4	NADH:Ubiquinone Oxidoreductase Subunit S4	Protein Coding	O43181	55	GC05P053560	39.6963	https://www.genecards.org/cgi-bin/carddisp.pl?gene=NDUFS4
IRF3	Interferon Regulatory Factor 3	Protein Coding	Q14653	58	GC19M049659	39.6688	https://www.genecards.org/cgi-bin/carddisp.pl?gene=IRF3
IFT80	Intraflagellar Transport 80	Protein Coding	Q9P2H3	48	GC03M160256	39.6484	https://www.genecards.org/cgi-bin/carddisp.pl?gene=IFT80
PLA2G4A	Phospholipase A2 Group IVA	Protein Coding	P47712	61	GC01P186798	39.6351	https://www.genecards.org/cgi-bin/carddisp.pl?gene=PLA2G4A
SDHC	Succinate Dehydrogenase Complex Subunit C	Protein Coding	Q99643	55	GC01P161314	39.6262	https://www.genecards.org/cgi-bin/carddisp.pl?gene=SDHC
KAT6B	Lysine Acetyltransferase 6B	Protein Coding	Q8WYB5	57	GC10P077028	39.6179	https://www.genecards.org/cgi-bin/carddisp.pl?gene=KAT6B
COX10	Cytochrome C Oxidase Assembly Factor Heme A:Farnesyltransferase COX10	Protein Coding	Q12887	55	GC17P014069	39.6094	https://www.genecards.org/cgi-bin/carddisp.pl?gene=COX10
ANK2	Ankyrin 2	Protein Coding	Q01484	54	GC04P112873	39.5978	https://www.genecards.org/cgi-bin/carddisp.pl?gene=ANK2
B4GAT1	Beta-1,4-Glucuronyltransferase 1	Protein Coding	O43505	50	GC11M066345	39.597	https://www.genecards.org/cgi-bin/carddisp.pl?gene=B4GAT1
F2RL1	F2R Like Trypsin Receptor 1	Protein Coding	P55085	56	GC05P076818	39.5681	https://www.genecards.org/cgi-bin/carddisp.pl?gene=F2RL1
SLC25A46	Solute Carrier Family 25 Member 46	Protein Coding	Q96AG3	50	GC05P110738	39.5362	https://www.genecards.org/cgi-bin/carddisp.pl?gene=SLC25A46
F9	Coagulation Factor IX	Protein Coding	P00740	60	GC0XP139530	39.522	https://www.genecards.org/cgi-bin/carddisp.pl?gene=F9
ELANE	Elastase, Neutrophil Expressed	Protein Coding	P08246	63	GC19P170492	39.5148	https://www.genecards.org/cgi-bin/carddisp.pl?gene=ELANE
F8	Coagulation Factor VIII	Protein Coding	P00451	60	GC0XM154835	39.5036	https://www.genecards.org/cgi-bin/carddisp.pl?gene=F8
COG4	Component Of Oligomeric Golgi Complex 4	Protein Coding	Q9H9E3	51	GC16M076645	39.4485	https://www.genecards.org/cgi-bin/carddisp.pl?gene=COG4
MIR34A	MicroRNA 34a	RNA Gene		30	GC01M009151	39.4276	https://www.genecards.org/cgi-bin/carddisp.pl?gene=MIR34A
DDB2	Damage Specific DNA Binding Protein 2	Protein Coding	Q92466	58	GC11P049913	39.4272	https://www.genecards.org/cgi-bin/carddisp.pl?gene=DDB2
PGF	Placental Growth Factor	Protein Coding	P49763	56	GC14M074941	39.4193	https://www.genecards.org/cgi-bin/carddisp.pl?gene=PGF
PRNP	Prion Protein (Kanno Blood Group)	Protein Coding	F7VJQ1	61	GC20P012441	39.4178	https://www.genecards.org/cgi-bin/carddisp.pl?gene=PRNP
CLN3	CLN3 Lysosomal/Endosomal Transmembrane Protein, Battenin	Protein Coding	Q13286	55	GC16M028466	39.3852	https://www.genecards.org/cgi-bin/carddisp.pl?gene=CLN3
IL12B	Interleukin 12B	Protein Coding	P29460	56	GC05M159314	39.3827	https://www.genecards.org/cgi-bin/carddisp.pl?gene=IL12B
JAZF1	JAZF Zinc Finger 1	Protein Coding	Q86VZ6	49	GC07M027830	39.3825	https://www.genecards.org/cgi-bin/carddisp.pl?gene=JAZF1
PTPRF	Protein Tyrosine Phosphatase Receptor Type F	Protein Coding	P10586	61	GC01P094915	39.3747	https://www.genecards.org/cgi-bin/carddisp.pl?gene=PTPRF
APOL1	Apolipoprotein L1	Protein Coding	O14791	56	GC22P036253	39.3665	https://www.genecards.org/cgi-bin/carddisp.pl?gene=APOL1
COL18A1	Collagen Type XVIII Alpha 1 Chain	Protein Coding	P39060	58	GC21P045405	39.3511	https://www.genecards.org/cgi-bin/carddisp.pl?gene=COL18A1
SLC22A2	Solute Carrier Family 22 Member 2	Protein Coding	O15244	55	GC06M160246	39.3413	https://www.genecards.org/cgi-bin/carddisp.pl?gene=SLC22A2
OXTR	Oxytocin Receptor	Protein Coding	P30559	60	GC03M008767	39.3396	https://www.genecards.org/cgi-bin/carddisp.pl?gene=OXTR
SEPSECS	Sep (O-Phosphoserine) TRNA:Sec (Selenocysteine) TRNA Synthase	Protein Coding	Q9HD40	54	GC04M025121	39.3216	https://www.genecards.org/cgi-bin/carddisp.pl?gene=SEPSECS
IL15	Interleukin 15	Protein Coding	P40933	55	GC04P141636	39.3069	https://www.genecards.org/cgi-bin/carddisp.pl?gene=IL15
WDR72	WD Repeat Domain 72	Protein Coding	Q3MJ13	47	GC15M173530	39.2815	https://www.genecards.org/cgi-bin/carddisp.pl?gene=WDR72
KRT17	Keratin 17	Protein Coding	Q04695	57	GC17M041619	39.2625	https://www.genecards.org/cgi-bin/carddisp.pl?gene=KRT17
YARS1	Tyrosyl-TRNA Synthetase 1	Protein Coding	P54577	55	GC01M041551	39.2571	https://www.genecards.org/cgi-bin/carddisp.pl?gene=YARS1
CNGA3	Cyclic Nucleotide Gated Channel Subunit Alpha 3	Protein Coding	Q16281	54	GC02P102541	39.2518	https://www.genecards.org/cgi-bin/carddisp.pl?gene=CNGA3
MAP4K2	Mitogen-Activated Protein Kinase Kinase Kinase Kinase 2	Protein Coding	Q12851	58	GC11M146137	39.2506	https://www.genecards.org/cgi-bin/carddisp.pl?gene=MAP4K2
HSPA4	Heat Shock Protein Family A (Hsp70) Member 4	Protein Coding	P34932	55	GC05P133051	39.2501	https://www.genecards.org/cgi-bin/carddisp.pl?gene=HSPA4
SLC6A4	Solute Carrier Family 6 Member 4	Protein Coding	P31645	60	GC17M030194	39.2314	https://www.genecards.org/cgi-bin/carddisp.pl?gene=SLC6A4
IDE	Insulin Degrading Enzyme	Protein Coding	P14735	60	GC10M092451	39.2305	https://www.genecards.org/cgi-bin/carddisp.pl?gene=IDE
TNNT3	Troponin T3, Fast Skeletal Type	Protein Coding	P45378	54	GC11P024786	39.2209	https://www.genecards.org/cgi-bin/carddisp.pl?gene=TNNT3
BBS1	Bardet-Biedl Syndrome 1	Protein Coding	Q8NFJ9	51	GC11P129999	39.1807	https://www.genecards.org/cgi-bin/carddisp.pl?gene=BBS1
ATL1	Atlastin GTPase 1	Protein Coding	Q8WXF7	52	GC14P050532	39.1683	https://www.genecards.org/cgi-bin/carddisp.pl?gene=ATL1
XPC	XPC Complex Subunit, DNA Damage Recognition And Repair Factor	Protein Coding	Q01831	58	GC03M029834	39.1647	https://www.genecards.org/cgi-bin/carddisp.pl?gene=XPC
FLT3	Fms Related Receptor Tyrosine Kinase 3	Protein Coding	P36888	66	GC13M028003	39.114	https://www.genecards.org/cgi-bin/carddisp.pl?gene=FLT3
MED12	Mediator Complex Subunit 12	Protein Coding	Q93074	56	GC0XP071118	39.1076	https://www.genecards.org/cgi-bin/carddisp.pl?gene=MED12
FOXL2	Forkhead Box L2	Protein Coding	P58012	54	GC03M138944	39.0824	https://www.genecards.org/cgi-bin/carddisp.pl?gene=FOXL2
MYO5A	Myosin VA	Protein Coding	Q9Y4I1	56	GC15M171666	39.0781	https://www.genecards.org/cgi-bin/carddisp.pl?gene=MYO5A
NBN	Nibrin	Protein Coding	O60934	61	GC08M089933	39.0667	https://www.genecards.org/cgi-bin/carddisp.pl?gene=NBN
XBP1	X-Box Binding Protein 1	Protein Coding	P17861	58	GC22M028794	39.0665	https://www.genecards.org/cgi-bin/carddisp.pl?gene=XBP1
PRKAA1	Protein Kinase AMP-Activated Catalytic Subunit Alpha 1	Protein Coding	Q13131	59	GC05M040759	39.0585	https://www.genecards.org/cgi-bin/carddisp.pl?gene=PRKAA1
DCAF17	DDB1 And CUL4 Associated Factor 17	Protein Coding	Q5H9S7	50	GC02P171434	38.9931	https://www.genecards.org/cgi-bin/carddisp.pl?gene=DCAF17
CACNB2	Calcium Voltage-Gated Channel Auxiliary Subunit Beta 2	Protein Coding	Q08289	58	GC10P018141	38.9826	https://www.genecards.org/cgi-bin/carddisp.pl?gene=CACNB2
CLCN7	Chloride Voltage-Gated Channel 7	Protein Coding	P51798	57	GC16M001444	38.981	https://www.genecards.org/cgi-bin/carddisp.pl?gene=CLCN7
CARS2	Cysteinyl-TRNA Synthetase 2, Mitochondrial	Protein Coding	Q9HA77	52	GC13M110641	38.9688	https://www.genecards.org/cgi-bin/carddisp.pl?gene=CARS2
HMGCS2	3-Hydroxy-3-Methylglutaryl-CoA Synthase 2	Protein Coding	P54868	58	GC01M119747	38.9531	https://www.genecards.org/cgi-bin/carddisp.pl?gene=HMGCS2
GRIN2B	Glutamate Ionotropic Receptor NMDA Type Subunit 2B	Protein Coding	Q13224	65	GC12M013437	38.9403	https://www.genecards.org/cgi-bin/carddisp.pl?gene=GRIN2B
CALM1	Calmodulin 1	Protein Coding	P0DP23	57	GC14P090396	38.9103	https://www.genecards.org/cgi-bin/carddisp.pl?gene=CALM1
IL6R	Interleukin 6 Receptor	Protein Coding	P08887	63	GC01P154405	38.8936	https://www.genecards.org/cgi-bin/carddisp.pl?gene=IL6R
NDUFAF2	NADH:Ubiquinone Oxidoreductase Complex Assembly Factor 2	Protein Coding	Q8N183	53	GC05P060945	38.8811	https://www.genecards.org/cgi-bin/carddisp.pl?gene=NDUFAF2
SETD2	SET Domain Containing 2, Histone Lysine Methyltransferase	Protein Coding	Q9BYW2	59	GC03M047033	38.8444	https://www.genecards.org/cgi-bin/carddisp.pl?gene=SETD2
HADHA	Hydroxyacyl-CoA Dehydrogenase Trifunctional Multienzyme Complex Subunit Alpha	Protein Coding	P40939	58	GC02M026190	38.838	https://www.genecards.org/cgi-bin/carddisp.pl?gene=HADHA
PRL	Prolactin	Protein Coding	P01236	56	GC06M022287	38.8373	https://www.genecards.org/cgi-bin/carddisp.pl?gene=PRL
KMT2A	Lysine Methyltransferase 2A	Protein Coding	Q03164	60	GC11P118436	38.8316	https://www.genecards.org/cgi-bin/carddisp.pl?gene=KMT2A
ANKH	ANKH Inorganic Pyrophosphate Transport Regulator	Protein Coding	Q9HCJ1	50	GC05M015011	38.8043	https://www.genecards.org/cgi-bin/carddisp.pl?gene=ANKH
BICD2	BICD Cargo Adaptor 2	Protein Coding	Q8TD16	52	GC09M092711	38.7881	https://www.genecards.org/cgi-bin/carddisp.pl?gene=BICD2
NDUFS2	NADH:Ubiquinone Oxidoreductase Core Subunit S2	Protein Coding	O75306	56	GC01P161197	38.7723	https://www.genecards.org/cgi-bin/carddisp.pl?gene=NDUFS2
MOCOS	Molybdenum Cofactor Sulfurase	Protein Coding	Q96EN8	51	GC18P036187	38.7593	https://www.genecards.org/cgi-bin/carddisp.pl?gene=MOCOS
DSG2	Desmoglein 2	Protein Coding	Q14126	56	GC18P031498	38.7585	https://www.genecards.org/cgi-bin/carddisp.pl?gene=DSG2
SH2B3	SH2B Adaptor Protein 3	Protein Coding	Q9UQQ2	59	GC12P111405	38.745	https://www.genecards.org/cgi-bin/carddisp.pl?gene=SH2B3
PLCB4	Phospholipase C Beta 4	Protein Coding	Q15147	57	GC20P009067	38.6764	https://www.genecards.org/cgi-bin/carddisp.pl?gene=PLCB4
CUL4B	Cullin 4B	Protein Coding	Q13620	54	GC0XM120640	38.6481	https://www.genecards.org/cgi-bin/carddisp.pl?gene=CUL4B
CD86	CD86 Molecule	Protein Coding	P42081	57	GC03P122055	38.6456	https://www.genecards.org/cgi-bin/carddisp.pl?gene=CD86
ZAP70	Zeta Chain Of T Cell Receptor Associated Protein Kinase 70	Protein Coding	P43403	63	GC02P102516	38.6416	https://www.genecards.org/cgi-bin/carddisp.pl?gene=ZAP70
PYGL	Glycogen Phosphorylase L	Protein Coding	P06737	58	GC14M050857	38.6273	https://www.genecards.org/cgi-bin/carddisp.pl?gene=PYGL
CD38	CD38 Molecule	Protein Coding	P28907	60	GC04P034327	38.6255	https://www.genecards.org/cgi-bin/carddisp.pl?gene=CD38
KDM5C	Lysine Demethylase 5C	Protein Coding	P41229	58	GC0XM053176	38.6077	https://www.genecards.org/cgi-bin/carddisp.pl?gene=KDM5C
TBK1	TANK Binding Kinase 1	Protein Coding	Q9UHD2	61	GC12P087253	38.5998	https://www.genecards.org/cgi-bin/carddisp.pl?gene=TBK1
ACADM	Acyl-CoA Dehydrogenase Medium Chain	Protein Coding	P11310	58	GC01P075724	38.5954	https://www.genecards.org/cgi-bin/carddisp.pl?gene=ACADM
C1S	Complement C1s	Protein Coding	P09871	60	GC12P085741	38.5827	https://www.genecards.org/cgi-bin/carddisp.pl?gene=C1S
RASGRP2	RAS Guanyl Releasing Protein 2	Protein Coding	Q7LDG7	56	GC11M064726	38.5387	https://www.genecards.org/cgi-bin/carddisp.pl?gene=RASGRP2
FLT4	Fms Related Receptor Tyrosine Kinase 4	Protein Coding	P35916	64	GC05M184002	38.5337	https://www.genecards.org/cgi-bin/carddisp.pl?gene=FLT4
SLC9A6	Solute Carrier Family 9 Member A6	Protein Coding	Q92581	57	GC0XP135985	38.5213	https://www.genecards.org/cgi-bin/carddisp.pl?gene=SLC9A6
SPP1	Secreted Phosphoprotein 1	Protein Coding	P10451	57	GC04P087975	38.5106	https://www.genecards.org/cgi-bin/carddisp.pl?gene=SPP1
SIRT2	Sirtuin 2	Protein Coding	Q8IXJ6	60	GC19M038878	38.5044	https://www.genecards.org/cgi-bin/carddisp.pl?gene=SIRT2
UBQLN2	Ubiquilin 2	Protein Coding	Q9UHD9	54	GC0XP056563	38.502	https://www.genecards.org/cgi-bin/carddisp.pl?gene=UBQLN2
CYP2E1	Cytochrome P450 Family 2 Subfamily E Member 1	Protein Coding	P05181	58	GC10P133520	38.4943	https://www.genecards.org/cgi-bin/carddisp.pl?gene=CYP2E1
NRG1	Neuregulin 1	Protein Coding	Q02297	60	GC08P031639	38.4709	https://www.genecards.org/cgi-bin/carddisp.pl?gene=NRG1
MIR126	MicroRNA 126	RNA Gene		30	GC09P136670	38.4593	https://www.genecards.org/cgi-bin/carddisp.pl?gene=MIR126
NPY	Neuropeptide Y	Protein Coding	P01303	58	GC07P032285	38.4566	https://www.genecards.org/cgi-bin/carddisp.pl?gene=NPY
SYK	Spleen Associated Tyrosine Kinase	Protein Coding	P43405	64	GC09P159630	38.4476	https://www.genecards.org/cgi-bin/carddisp.pl?gene=SYK
TMEM231	Transmembrane Protein 231	Protein Coding	Q9H6L2	49	GC16M075536	38.4456	https://www.genecards.org/cgi-bin/carddisp.pl?gene=TMEM231
SEC63	SEC63 Protein Translocation Regulator	Protein Coding	Q9UGP8	54	GC06M107867	38.4407	https://www.genecards.org/cgi-bin/carddisp.pl?gene=SEC63
HDAC1	Histone Deacetylase 1	Protein Coding	Q13547	64	GC01P093620	38.4391	https://www.genecards.org/cgi-bin/carddisp.pl?gene=HDAC1
KLHL3	Kelch Like Family Member 3	Protein Coding	Q9UH77	52	GC05M137617	38.438	https://www.genecards.org/cgi-bin/carddisp.pl?gene=KLHL3
STING1	Stimulator Of Interferon Response CGAMP Interactor 1	Protein Coding	Q86WV6	55	GC05M139510	38.4344	https://www.genecards.org/cgi-bin/carddisp.pl?gene=STING1
NSD1	Nuclear Receptor Binding SET Domain Protein 1	Protein Coding	Q96L73	56	GC05P192138	38.4331	https://www.genecards.org/cgi-bin/carddisp.pl?gene=NSD1
TAP1	Transporter 1, ATP Binding Cassette Subfamily B Member	Protein Coding	Q03518	61	GC06M115021	38.4052	https://www.genecards.org/cgi-bin/carddisp.pl?gene=TAP1
MNX1	Motor Neuron And Pancreas Homeobox 1	Protein Coding	P50219	54	GC07M156994	38.3953	https://www.genecards.org/cgi-bin/carddisp.pl?gene=MNX1
EIF2S3	Eukaryotic Translation Initiation Factor 2 Subunit Gamma	Protein Coding	P41091	58	GC0XP024054	38.3936	https://www.genecards.org/cgi-bin/carddisp.pl?gene=EIF2S3
SPRED1	Sprouty Related EVH1 Domain Containing 1	Protein Coding	Q7Z699	54	GC15P038252	38.3915	https://www.genecards.org/cgi-bin/carddisp.pl?gene=SPRED1
DNA2	DNA Replication Helicase/Nuclease 2	Protein Coding	P51530	54	GC10M068414	38.3823	https://www.genecards.org/cgi-bin/carddisp.pl?gene=DNA2
C1R	Complement C1r	Protein Coding	P00736	60	GC12M038791	38.3778	https://www.genecards.org/cgi-bin/carddisp.pl?gene=C1R
IHH	Indian Hedgehog Signaling Molecule	Protein Coding	Q14623	58	GC02M219054	38.3673	https://www.genecards.org/cgi-bin/carddisp.pl?gene=IHH
NCOA1	Nuclear Receptor Coactivator 1	Protein Coding	Q15788	58	GC02P024584	38.3653	https://www.genecards.org/cgi-bin/carddisp.pl?gene=NCOA1
MPL	MPL Proto-Oncogene, Thrombopoietin Receptor	Protein Coding	P40238	60	GC01P043337	38.363	https://www.genecards.org/cgi-bin/carddisp.pl?gene=MPL
FARS2	Phenylalanyl-TRNA Synthetase 2, Mitochondrial	Protein Coding	O95363	56	GC06P020714	38.2668	https://www.genecards.org/cgi-bin/carddisp.pl?gene=FARS2
CACNA1B	Calcium Voltage-Gated Channel Subunit Alpha1 B	Protein Coding	Q00975	62	GC09P137877	38.2655	https://www.genecards.org/cgi-bin/carddisp.pl?gene=CACNA1B
PRICKLE2	Prickle Planar Cell Polarity Protein 2	Protein Coding	Q7Z3G6	51	GC03M064092	38.2634	https://www.genecards.org/cgi-bin/carddisp.pl?gene=PRICKLE2
GLI1	GLI Family Zinc Finger 1	Protein Coding	P08151	60	GC12P087089	38.2629	https://www.genecards.org/cgi-bin/carddisp.pl?gene=GLI1
PAX8	Paired Box 8	Protein Coding	Q06710	57	GC02M113215	38.2268	https://www.genecards.org/cgi-bin/carddisp.pl?gene=PAX8
PC	Pyruvate Carboxylase	Protein Coding	P11498	60	GC11M066848	38.2183	https://www.genecards.org/cgi-bin/carddisp.pl?gene=PC
MIR146A	MicroRNA 146a	RNA Gene		31	GC05P160485	38.2124	https://www.genecards.org/cgi-bin/carddisp.pl?gene=MIR146A
ATP11A	ATPase Phospholipid Transporting 11A	Protein Coding	P98196	54	GC13P112716	38.1955	https://www.genecards.org/cgi-bin/carddisp.pl?gene=ATP11A
SPG7	SPG7 Matrix AAA Peptidase Subunit, Paraplegin	Protein Coding	Q9UQ90	56	GC16P138704	38.1835	https://www.genecards.org/cgi-bin/carddisp.pl?gene=SPG7
DDX3X	DEAD-Box Helicase 3 X-Linked	Protein Coding	O00571	61	GC0XP041333	38.1802	https://www.genecards.org/cgi-bin/carddisp.pl?gene=DDX3X
CEP57	Centrosomal Protein 57	Protein Coding	Q86XR8	53	GC11P095789	38.1751	https://www.genecards.org/cgi-bin/carddisp.pl?gene=CEP57
WDR62	WD Repeat Domain 62	Protein Coding	O43379	50	GC19P036054	38.1387	https://www.genecards.org/cgi-bin/carddisp.pl?gene=WDR62
ETFA	Electron Transfer Flavoprotein Subunit Alpha	Protein Coding	P13804	58	GC15M170399	38.1205	https://www.genecards.org/cgi-bin/carddisp.pl?gene=ETFA
IL4R	Interleukin 4 Receptor	Protein Coding	P24394	60	GC16P136554	38.11	https://www.genecards.org/cgi-bin/carddisp.pl?gene=IL4R
TIMP3	TIMP Metallopeptidase Inhibitor 3	Protein Coding	P35625	56	GC22P102487	38.0951	https://www.genecards.org/cgi-bin/carddisp.pl?gene=TIMP3
TUBA1A	Tubulin Alpha 1a	Protein Coding	Q71U36	61	GC12M049184	38.0808	https://www.genecards.org/cgi-bin/carddisp.pl?gene=TUBA1A
CASK	Calcium/Calmodulin Dependent Serine Protein Kinase	Protein Coding	O14936	61	GC0XM041514	38.0804	https://www.genecards.org/cgi-bin/carddisp.pl?gene=CASK
TKT	Transketolase	Protein Coding	P29401	58	GC03M053224	38.0523	https://www.genecards.org/cgi-bin/carddisp.pl?gene=TKT
EIF2B1	Eukaryotic Translation Initiation Factor 2B Subunit Alpha	Protein Coding	Q14232	55	GC12M123620	38.0504	https://www.genecards.org/cgi-bin/carddisp.pl?gene=EIF2B1
FGF8	Fibroblast Growth Factor 8	Protein Coding	P55075	60	GC10M101770	38.0456	https://www.genecards.org/cgi-bin/carddisp.pl?gene=FGF8
CYP24A1	Cytochrome P450 Family 24 Subfamily A Member 1	Protein Coding	Q07973	60	GC20M054153	38.0313	https://www.genecards.org/cgi-bin/carddisp.pl?gene=CYP24A1
PCK2	Phosphoenolpyruvate Carboxykinase 2, Mitochondrial	Protein Coding	Q16822	58	GC14P024094	37.9987	https://www.genecards.org/cgi-bin/carddisp.pl?gene=PCK2
CD46	CD46 Molecule	Protein Coding	P15529	60	GC01P207752	37.9736	https://www.genecards.org/cgi-bin/carddisp.pl?gene=CD46
PHKA2	Phosphorylase Kinase Regulatory Subunit Alpha 2	Protein Coding	P46019	55	GC0XM018892	37.971	https://www.genecards.org/cgi-bin/carddisp.pl?gene=PHKA2
CLEC7A	C-Type Lectin Domain Containing 7A	Protein Coding	Q9BXN2	58	GC12M038941	37.9697	https://www.genecards.org/cgi-bin/carddisp.pl?gene=CLEC7A
NCAPH2	Non-SMC Condensin II Complex Subunit H2	Protein Coding	Q6IBW4	50	GC22P050508	37.9657	https://www.genecards.org/cgi-bin/carddisp.pl?gene=NCAPH2
FASN	Fatty Acid Synthase	Protein Coding	P49327	61	GC17M082078	37.9548	https://www.genecards.org/cgi-bin/carddisp.pl?gene=FASN
GOSR2	Golgi SNAP Receptor Complex Member 2	Protein Coding	O14653	54	GC17P175794	37.9539	https://www.genecards.org/cgi-bin/carddisp.pl?gene=GOSR2
FOXO3	Forkhead Box O3	Protein Coding	O43524	61	GC06P108559	37.9503	https://www.genecards.org/cgi-bin/carddisp.pl?gene=FOXO3
HK2	Hexokinase 2	Protein Coding	P52789	58	GC02P076124	37.9296	https://www.genecards.org/cgi-bin/carddisp.pl?gene=HK2
ABCD4	ATP Binding Cassette Subfamily D Member 4	Protein Coding	O14678	53	GC14M074285	37.9248	https://www.genecards.org/cgi-bin/carddisp.pl?gene=ABCD4
TLR9	Toll Like Receptor 9	Protein Coding	Q9NR96	59	GC03M055425	37.9231	https://www.genecards.org/cgi-bin/carddisp.pl?gene=TLR9
CASP2	Caspase 2	Protein Coding	P42575	61	GC07P170553	37.8928	https://www.genecards.org/cgi-bin/carddisp.pl?gene=CASP2
POU3F4	POU Class 3 Homeobox 4	Protein Coding	P49335	48	GC0XP083508	37.8694	https://www.genecards.org/cgi-bin/carddisp.pl?gene=POU3F4
TSEN2	TRNA Splicing Endonuclease Subunit 2	Protein Coding	Q8NCE0	53	GC03P030233	37.8546	https://www.genecards.org/cgi-bin/carddisp.pl?gene=TSEN2
EFTUD2	Elongation Factor Tu GTP Binding Domain Containing 2	Protein Coding	Q15029	54	GC17M104861	37.8546	https://www.genecards.org/cgi-bin/carddisp.pl?gene=EFTUD2
PALB2	Partner And Localizer Of BRCA2	Protein Coding	Q86YC2	57	GC16M023603	37.8342	https://www.genecards.org/cgi-bin/carddisp.pl?gene=PALB2
AGPS	Alkylglycerone Phosphate Synthase	Protein Coding	O00116	55	GC02P177392	37.8305	https://www.genecards.org/cgi-bin/carddisp.pl?gene=AGPS
NOX4	NADPH Oxidase 4	Protein Coding	Q9NPH5	56	GC11M089324	37.8022	https://www.genecards.org/cgi-bin/carddisp.pl?gene=NOX4
NAGS	N-Acetylglutamate Synthase	Protein Coding	Q8N159	54	GC17P044004	37.7973	https://www.genecards.org/cgi-bin/carddisp.pl?gene=NAGS
NQO1	NAD(P)H Quinone Dehydrogenase 1	Protein Coding	P15559	61	GC16M069706	37.7741	https://www.genecards.org/cgi-bin/carddisp.pl?gene=NQO1
MT-ATP6	Mitochondrially Encoded ATP Synthase Membrane Subunit 6	Protein Coding	P00846	44	GCMTP008531	37.7625	https://www.genecards.org/cgi-bin/carddisp.pl?gene=MT-ATP6
TCF4	Transcription Factor 4	Protein Coding	P15884	59	GC18M055222	37.7407	https://www.genecards.org/cgi-bin/carddisp.pl?gene=TCF4
CNTNAP2	Contactin Associated Protein 2	Protein Coding	Q9UHC6	57	GC07P146116	37.7308	https://www.genecards.org/cgi-bin/carddisp.pl?gene=CNTNAP2
CD79A	CD79a Molecule	Protein Coding	P11912	60	GC19P041877	37.73	https://www.genecards.org/cgi-bin/carddisp.pl?gene=CD79A
PHYH	Phytanoyl-CoA 2-Hydroxylase	Protein Coding	O14832	55	GC10M013277	37.7177	https://www.genecards.org/cgi-bin/carddisp.pl?gene=PHYH
PRKG1	Protein Kinase CGMP-Dependent 1	Protein Coding	Q13976	63	GC10P054744	37.707	https://www.genecards.org/cgi-bin/carddisp.pl?gene=PRKG1
LCK	LCK Proto-Oncogene, Src Family Tyrosine Kinase	Protein Coding	P06239	64	GC01P032251	37.7058	https://www.genecards.org/cgi-bin/carddisp.pl?gene=LCK
MBTPS2	Membrane Bound Transcription Factor Peptidase, Site 2	Protein Coding	O43462	52	GC0XP021839	37.6842	https://www.genecards.org/cgi-bin/carddisp.pl?gene=MBTPS2
NARS2	Asparaginyl-TRNA Synthetase 2, Mitochondrial	Protein Coding	Q96I59	55	GC11M078435	37.6624	https://www.genecards.org/cgi-bin/carddisp.pl?gene=NARS2
F12	Coagulation Factor XII	Protein Coding	P00748	61	GC05M177402	37.5936	https://www.genecards.org/cgi-bin/carddisp.pl?gene=F12
SOST	Sclerostin	Protein Coding	Q9BQB4	55	GC17M043753	37.5901	https://www.genecards.org/cgi-bin/carddisp.pl?gene=SOST
HEXA	Hexosaminidase Subunit Alpha	Protein Coding	P06865	59	GC15M072340	37.5703	https://www.genecards.org/cgi-bin/carddisp.pl?gene=HEXA
POLG2	DNA Polymerase Gamma 2, Accessory Subunit	Protein Coding	Q9UHN1	52	GC17M064477	37.5374	https://www.genecards.org/cgi-bin/carddisp.pl?gene=POLG2
THBS1	Thrombospondin 1	Protein Coding	P07996	59	GC15P210325	37.5342	https://www.genecards.org/cgi-bin/carddisp.pl?gene=THBS1
EDNRA	Endothelin Receptor Type A	Protein Coding	P25101	61	GC04P147480	37.4898	https://www.genecards.org/cgi-bin/carddisp.pl?gene=EDNRA
NAT2	N-Acetyltransferase 2	Protein Coding	P11245	56	GC08P018391	37.4584	https://www.genecards.org/cgi-bin/carddisp.pl?gene=NAT2
EPAS1	Endothelial PAS Domain Protein 1	Protein Coding	Q99814	63	GC02P046293	37.437	https://www.genecards.org/cgi-bin/carddisp.pl?gene=EPAS1
SBF1	SET Binding Factor 1	Protein Coding	O95248	53	GC22M090889	37.4173	https://www.genecards.org/cgi-bin/carddisp.pl?gene=SBF1
EBP	EBP Cholestenol Delta-Isomerase	Protein Coding	Q15125	55	GC0XP048521	37.4035	https://www.genecards.org/cgi-bin/carddisp.pl?gene=EBP
SUN1	Sad1 And UNC84 Domain Containing 1	Protein Coding	O94901	51	GC07P000815	37.3996	https://www.genecards.org/cgi-bin/carddisp.pl?gene=SUN1
PRODH	Proline Dehydrogenase 1	Protein Coding	O43272	56	GC22M018912	37.3697	https://www.genecards.org/cgi-bin/carddisp.pl?gene=PRODH
PSMB9	Proteasome 20S Subunit Beta 9	Protein Coding	P28065	59	GC06P199560	37.3647	https://www.genecards.org/cgi-bin/carddisp.pl?gene=PSMB9
ACTN4	Actinin Alpha 4	Protein Coding	O43707	59	GC19P038647	37.3507	https://www.genecards.org/cgi-bin/carddisp.pl?gene=ACTN4
ALX4	ALX Homeobox 4	Protein Coding	Q9H161	51	GC11M044238	37.3233	https://www.genecards.org/cgi-bin/carddisp.pl?gene=ALX4
CHST6	Carbohydrate Sulfotransferase 6	Protein Coding	Q9GZX3	53	GC16M075472	37.3108	https://www.genecards.org/cgi-bin/carddisp.pl?gene=CHST6
NR0B1	Nuclear Receptor Subfamily 0 Group B Member 1	Protein Coding	P51843	58	GC0XM030304	37.2955	https://www.genecards.org/cgi-bin/carddisp.pl?gene=NR0B1
TMEM165	Transmembrane Protein 165	Protein Coding	Q9HC07	50	GC04P055395	37.2578	https://www.genecards.org/cgi-bin/carddisp.pl?gene=TMEM165
TWIST1	Twist Family BHLH Transcription Factor 1	Protein Coding	Q15672	58	GC07M019020	37.2357	https://www.genecards.org/cgi-bin/carddisp.pl?gene=TWIST1
PCK1	Phosphoenolpyruvate Carboxykinase 1	Protein Coding	P35558	60	GC20P060649	37.2354	https://www.genecards.org/cgi-bin/carddisp.pl?gene=PCK1
CYP11A1	Cytochrome P450 Family 11 Subfamily A Member 1	Protein Coding	P05108	61	GC15M074337	37.2346	https://www.genecards.org/cgi-bin/carddisp.pl?gene=CYP11A1
CYP1B1	Cytochrome P450 Family 1 Subfamily B Member 1	Protein Coding	Q16678	60	GC02M038066	37.2297	https://www.genecards.org/cgi-bin/carddisp.pl?gene=CYP1B1
IL5	Interleukin 5	Protein Coding	P05113	58	GC05M132541	37.1716	https://www.genecards.org/cgi-bin/carddisp.pl?gene=IL5
SI	Sucrase-Isomaltase	Protein Coding	P14410	57	GC03M164978	37.1571	https://www.genecards.org/cgi-bin/carddisp.pl?gene=SI
ADAM17	ADAM Metallopeptidase Domain 17	Protein Coding	P78536	63	GC02M009488	37.1448	https://www.genecards.org/cgi-bin/carddisp.pl?gene=ADAM17
POR	Cytochrome P450 Oxidoreductase	Protein Coding	P16435	60	GC07P075899	37.1212	https://www.genecards.org/cgi-bin/carddisp.pl?gene=POR
GNB3	G Protein Subunit Beta 3	Protein Coding	P16520	59	GC12P006839	37.1159	https://www.genecards.org/cgi-bin/carddisp.pl?gene=GNB3
LTBP4	Latent Transforming Growth Factor Beta Binding Protein 4	Protein Coding	Q8N2S1	54	GC19P040592	37.0957	https://www.genecards.org/cgi-bin/carddisp.pl?gene=LTBP4
CIDEC	Cell Death Inducing DFFA Like Effector C	Protein Coding	Q96AQ7	51	GC03M009866	37.0902	https://www.genecards.org/cgi-bin/carddisp.pl?gene=CIDEC
COG6	Component Of Oligomeric Golgi Complex 6	Protein Coding	Q9Y2V7	50	GC13P039655	37.0837	https://www.genecards.org/cgi-bin/carddisp.pl?gene=COG6
KCNMA1	Potassium Calcium-Activated Channel Subfamily M Alpha 1	Protein Coding	Q12791	60	GC10M076869	37.0696	https://www.genecards.org/cgi-bin/carddisp.pl?gene=KCNMA1
FUT2	Fucosyltransferase 2 (H Blood Group)	Protein Coding	Q10981	57	GC19P048695	37.0657	https://www.genecards.org/cgi-bin/carddisp.pl?gene=FUT2
CCL3	C-C Motif Chemokine Ligand 3	Protein Coding	P10147	53	GC17M036088	37.037	https://www.genecards.org/cgi-bin/carddisp.pl?gene=CCL3
KMT2C	Lysine Methyltransferase 2C	Protein Coding	Q8NEZ4	55	GC07M152134	37.0307	https://www.genecards.org/cgi-bin/carddisp.pl?gene=KMT2C
GALK1	Galactokinase 1	Protein Coding	P51570	60	GC17M075751	37.0255	https://www.genecards.org/cgi-bin/carddisp.pl?gene=GALK1
MCFD2	Multiple Coagulation Factor Deficiency 2, ER Cargo Receptor Complex Subunit	Protein Coding	Q8NI22	55	GC02M046901	37.0076	https://www.genecards.org/cgi-bin/carddisp.pl?gene=MCFD2
KEAP1	Kelch Like ECH Associated Protein 1	Protein Coding	Q14145	61	GC19M010486	37.0044	https://www.genecards.org/cgi-bin/carddisp.pl?gene=KEAP1
PDGFB	Platelet Derived Growth Factor Subunit B	Protein Coding	P01127	63	GC22M091586	36.9813	https://www.genecards.org/cgi-bin/carddisp.pl?gene=PDGFB
ADRB1	Adrenoceptor Beta 1	Protein Coding	P08588	62	GC10P135157	36.9754	https://www.genecards.org/cgi-bin/carddisp.pl?gene=ADRB1
CACNA2D1	Calcium Voltage-Gated Channel Auxiliary Subunit Alpha2delta 1	Protein Coding	P54289	59	GC07M081946	36.9612	https://www.genecards.org/cgi-bin/carddisp.pl?gene=CACNA2D1
USF1	Upstream Transcription Factor 1	Protein Coding	P22415	55	GC01M161039	36.8825	https://www.genecards.org/cgi-bin/carddisp.pl?gene=USF1
ALG11	ALG11 Alpha-1,2-Mannosyltransferase	Protein Coding	Q2TAA5	53	GC13P052012	36.8658	https://www.genecards.org/cgi-bin/carddisp.pl?gene=ALG11
CLN6	CLN6 Transmembrane ER Protein	Protein Coding	Q9NWW5	49	GC15M068206	36.8576	https://www.genecards.org/cgi-bin/carddisp.pl?gene=CLN6
PPP2R2B	Protein Phosphatase 2 Regulatory Subunit Bbeta	Protein Coding	Q00005	57	GC05M146582	36.8572	https://www.genecards.org/cgi-bin/carddisp.pl?gene=PPP2R2B
ATXN3	Ataxin 3	Protein Coding	P54252	58	GC14M126423	36.8484	https://www.genecards.org/cgi-bin/carddisp.pl?gene=ATXN3
MAN1B1	Mannosidase Alpha Class 1B Member 1	Protein Coding	Q9UKM7	59	GC09P137086	36.8112	https://www.genecards.org/cgi-bin/carddisp.pl?gene=MAN1B1
ABCG8	ATP Binding Cassette Subfamily G Member 8	Protein Coding	Q9H221	54	GC02P046036	36.802	https://www.genecards.org/cgi-bin/carddisp.pl?gene=ABCG8
CCM2	CCM2 Scaffold Protein	Protein Coding	Q9BSQ5	53	GC07P044999	36.7975	https://www.genecards.org/cgi-bin/carddisp.pl?gene=CCM2
AGO2	Argonaute RISC Catalytic Component 2	Protein Coding	Q9UKV8	55	GC08M141090	36.7817	https://www.genecards.org/cgi-bin/carddisp.pl?gene=AGO2
TNNI2	Troponin I2, Fast Skeletal Type	Protein Coding	P48788	54	GC11P024781	36.7811	https://www.genecards.org/cgi-bin/carddisp.pl?gene=TNNI2
EEF2	Eukaryotic Translation Elongation Factor 2	Protein Coding	P13639	61	GC19M003976	36.7694	https://www.genecards.org/cgi-bin/carddisp.pl?gene=EEF2
MEF2C	Myocyte Enhancer Factor 2C	Protein Coding	Q06413	61	GC05M088718	36.7426	https://www.genecards.org/cgi-bin/carddisp.pl?gene=MEF2C
KLF1	KLF Transcription Factor 1	Protein Coding	Q13351	54	GC19M012884	36.7133	https://www.genecards.org/cgi-bin/carddisp.pl?gene=KLF1
LOX	Lysyl Oxidase	Protein Coding	P28300	60	GC05M122063	36.7018	https://www.genecards.org/cgi-bin/carddisp.pl?gene=LOX
BCL11A	BCL11 Transcription Factor A	Protein Coding	Q9H165	56	GC02M060451	36.6754	https://www.genecards.org/cgi-bin/carddisp.pl?gene=BCL11A
MIR7-3HG	MIR7-3 Host Gene	RNA Gene	Q8N6C7	33	GC19P170668	36.6744	https://www.genecards.org/cgi-bin/carddisp.pl?gene=MIR7-3HG
RAPSN	Receptor Associated Protein Of The Synapse	Protein Coding	Q13702	53	GC11M145860	36.6608	https://www.genecards.org/cgi-bin/carddisp.pl?gene=RAPSN
TCAP	Titin-Cap	Protein Coding	O15273	53	GC17P175536	36.6467	https://www.genecards.org/cgi-bin/carddisp.pl?gene=TCAP
PSMB8	Proteasome 20S Subunit Beta 8	Protein Coding	P28062	62	GC06M032840	36.5999	https://www.genecards.org/cgi-bin/carddisp.pl?gene=PSMB8
SUFU	SUFU Negative Regulator Of Hedgehog Signaling	Protein Coding	Q9UMX1	55	GC10P134806	36.5996	https://www.genecards.org/cgi-bin/carddisp.pl?gene=SUFU
CEBPA	CCAAT Enhancer Binding Protein Alpha	Protein Coding	P49715	60	GC19M033299	36.5874	https://www.genecards.org/cgi-bin/carddisp.pl?gene=CEBPA
LHCGR	Luteinizing Hormone/Choriogonadotropin Receptor	Protein Coding	P22888	58	GC02M048686	36.5626	https://www.genecards.org/cgi-bin/carddisp.pl?gene=LHCGR
APTX	Aprataxin	Protein Coding	Q7Z2E3	55	GC09M032886	36.5559	https://www.genecards.org/cgi-bin/carddisp.pl?gene=APTX
MAGI2	Membrane Associated Guanylate Kinase, WW And PDZ Domain Containing 2	Protein Coding	Q86UL8	54	GC07M078017	36.5364	https://www.genecards.org/cgi-bin/carddisp.pl?gene=MAGI2
TUBB3	Tubulin Beta 3 Class III	Protein Coding	Q13509	63	GC16P138730	36.5364	https://www.genecards.org/cgi-bin/carddisp.pl?gene=TUBB3
ANGPTL8	Angiopoietin Like 8	Protein Coding	Q6UXH0	45	GC19P170951	36.5358	https://www.genecards.org/cgi-bin/carddisp.pl?gene=ANGPTL8
ACHE	Acetylcholinesterase (Yt Blood Group)	Protein Coding	P22303	60	GC07M100889	36.5319	https://www.genecards.org/cgi-bin/carddisp.pl?gene=ACHE
IL1R2	Interleukin 1 Receptor Type 2	Protein Coding	P27930	59	GC02P101991	36.5157	https://www.genecards.org/cgi-bin/carddisp.pl?gene=IL1R2
ANXA5	Annexin A5	Protein Coding	P08758	59	GC04M121667	36.499	https://www.genecards.org/cgi-bin/carddisp.pl?gene=ANXA5
IFNAR1	Interferon Alpha And Beta Receptor Subunit 1	Protein Coding	P17181	61	GC21P033324	36.4957	https://www.genecards.org/cgi-bin/carddisp.pl?gene=IFNAR1
GPIHBP1	Glycosylphosphatidylinositol Anchored High Density Lipoprotein Binding Protein 1	Protein Coding	Q8IV16	48	GC08P143213	36.4886	https://www.genecards.org/cgi-bin/carddisp.pl?gene=GPIHBP1
CHAT	Choline O-Acetyltransferase	Protein Coding	P28329	61	GC10P049609	36.4874	https://www.genecards.org/cgi-bin/carddisp.pl?gene=CHAT
PIGV	Phosphatidylinositol Glycan Anchor Biosynthesis Class V	Protein Coding	Q9NUD9	51	GC01P026787	36.4758	https://www.genecards.org/cgi-bin/carddisp.pl?gene=PIGV
AOC3	Amine Oxidase Copper Containing 3	Protein Coding	Q16853	58	GC17P042851	36.4702	https://www.genecards.org/cgi-bin/carddisp.pl?gene=AOC3
CD209	CD209 Molecule	Protein Coding	Q9NNX6	57	GC19M007739	36.4678	https://www.genecards.org/cgi-bin/carddisp.pl?gene=CD209
CD8A	CD8 Subunit Alpha	Protein Coding	P01732	60	GC02M086784	36.4676	https://www.genecards.org/cgi-bin/carddisp.pl?gene=CD8A
GYS1	Glycogen Synthase 1	Protein Coding	P13807	61	GC19M116558	36.4548	https://www.genecards.org/cgi-bin/carddisp.pl?gene=GYS1
PNPLA4	Patatin Like Domain 4, Phospholipase And Triacylglycerol Lipase	Protein Coding	P41247	49	GC0XM007898	36.4473	https://www.genecards.org/cgi-bin/carddisp.pl?gene=PNPLA4
PROP1	PROP Paired-Like Homeobox 1	Protein Coding	O75360	50	GC05M177992	36.4436	https://www.genecards.org/cgi-bin/carddisp.pl?gene=PROP1
TXNIP	Thioredoxin Interacting Protein	Protein Coding	Q9H3M7	52	GC01M145992	36.4426	https://www.genecards.org/cgi-bin/carddisp.pl?gene=TXNIP
TFRC	Transferrin Receptor	Protein Coding	P02786	63	GC03M196871	36.4307	https://www.genecards.org/cgi-bin/carddisp.pl?gene=TFRC
SFTPC	Surfactant Protein C	Protein Coding	P11686	52	GC08P022156	36.4184	https://www.genecards.org/cgi-bin/carddisp.pl?gene=SFTPC
VPS53	VPS53 Subunit Of GARP Complex	Protein Coding	Q5VIR6	53	GC17M000508	36.4039	https://www.genecards.org/cgi-bin/carddisp.pl?gene=VPS53
ASAH1	N-Acylsphingosine Amidohydrolase 1	Protein Coding	Q13510	62	GC08M018055	36.4023	https://www.genecards.org/cgi-bin/carddisp.pl?gene=ASAH1
CAMK2G	Calcium/Calmodulin Dependent Protein Kinase II Gamma	Protein Coding	Q13555	61	GC10M073812	36.4009	https://www.genecards.org/cgi-bin/carddisp.pl?gene=CAMK2G
GALC	Galactosylceramidase	Protein Coding	P54803	57	GC14M087837	36.3978	https://www.genecards.org/cgi-bin/carddisp.pl?gene=GALC
BAK1	BCL2 Antagonist/Killer 1	Protein Coding	Q16611	57	GC06M033572	36.3915	https://www.genecards.org/cgi-bin/carddisp.pl?gene=BAK1
ERCC1	ERCC Excision Repair 1, Endonuclease Non-Catalytic Subunit	Protein Coding	P07992	58	GC19M116421	36.3876	https://www.genecards.org/cgi-bin/carddisp.pl?gene=ERCC1
MT-CO1	Mitochondrially Encoded Cytochrome C Oxidase I	Protein Coding	P00395	47	GCMTP005906	36.3796	https://www.genecards.org/cgi-bin/carddisp.pl?gene=MT-CO1
NAMPT	Nicotinamide Phosphoribosyltransferase	Protein Coding	P43490	60	GC07M106248	36.3573	https://www.genecards.org/cgi-bin/carddisp.pl?gene=NAMPT
HSPA8	Heat Shock Protein Family A (Hsp70) Member 8	Protein Coding	P11142	62	GC11M123057	36.3398	https://www.genecards.org/cgi-bin/carddisp.pl?gene=HSPA8
LBR	Lamin B Receptor	Protein Coding	Q14739	58	GC01M230908	36.3373	https://www.genecards.org/cgi-bin/carddisp.pl?gene=LBR
SNAP25	Synaptosome Associated Protein 25	Protein Coding	P60880	61	GC20P012553	36.3324	https://www.genecards.org/cgi-bin/carddisp.pl?gene=SNAP25
PLD3	Phospholipase D Family Member 3	Protein Coding	Q8IV08	53	GC19P040348	36.3134	https://www.genecards.org/cgi-bin/carddisp.pl?gene=PLD3
VTN	Vitronectin	Protein Coding	P04004	57	GC17M104241	36.3103	https://www.genecards.org/cgi-bin/carddisp.pl?gene=VTN
GBA2	Glucosylceramidase Beta 2	Protein Coding	Q9HCG7	52	GC09M035736	36.3081	https://www.genecards.org/cgi-bin/carddisp.pl?gene=GBA2
ADAR	Adenosine Deaminase RNA Specific	Protein Coding	P55265	60	GC01M169752	36.3043	https://www.genecards.org/cgi-bin/carddisp.pl?gene=ADAR
DNM1L	Dynamin 1 Like	Protein Coding	O00429	60	GC12P032679	36.2786	https://www.genecards.org/cgi-bin/carddisp.pl?gene=DNM1L
HTR2A	5-Hydroxytryptamine Receptor 2A	Protein Coding	P28223	60	GC13M046831	36.2519	https://www.genecards.org/cgi-bin/carddisp.pl?gene=HTR2A
COX5A	Cytochrome C Oxidase Subunit 5A	Protein Coding	P20674	57	GC15M074919	36.2498	https://www.genecards.org/cgi-bin/carddisp.pl?gene=COX5A
KCNE2	Potassium Voltage-Gated Channel Subfamily E Regulatory Subunit 2	Protein Coding	Q9Y6J6	54	GC21P034344	36.2404	https://www.genecards.org/cgi-bin/carddisp.pl?gene=KCNE2
PTPRD	Protein Tyrosine Phosphatase Receptor Type D	Protein Coding	P23468	58	GC09M008307	36.2279	https://www.genecards.org/cgi-bin/carddisp.pl?gene=PTPRD
YARS2	Tyrosyl-TRNA Synthetase 2	Protein Coding	Q9Y2Z4	56	GC12M039371	36.2265	https://www.genecards.org/cgi-bin/carddisp.pl?gene=YARS2
KANK1	KN Motif And Ankyrin Repeat Domains 1	Protein Coding	Q14678	53	GC09P000527	36.2241	https://www.genecards.org/cgi-bin/carddisp.pl?gene=KANK1
SERPINA1	Serpin Family A Member 1	Protein Coding	P01009	62	GC14M094376	36.2157	https://www.genecards.org/cgi-bin/carddisp.pl?gene=SERPINA1
MYH14	Myosin Heavy Chain 14	Protein Coding	Q7Z406	58	GC19P172039	36.2141	https://www.genecards.org/cgi-bin/carddisp.pl?gene=MYH14
CIB2	Calcium And Integrin Binding Family Member 2	Protein Coding	O75838	51	GC15M078104	36.1998	https://www.genecards.org/cgi-bin/carddisp.pl?gene=CIB2
ATF2	Activating Transcription Factor 2	Protein Coding	P15336	60	GC02M175072	36.1943	https://www.genecards.org/cgi-bin/carddisp.pl?gene=ATF2
CD28	CD28 Molecule	Protein Coding	P10747	61	GC02P203706	36.1887	https://www.genecards.org/cgi-bin/carddisp.pl?gene=CD28
CSF1	Colony Stimulating Factor 1	Protein Coding	P09603	57	GC01P113875	36.186	https://www.genecards.org/cgi-bin/carddisp.pl?gene=CSF1
EYA1	EYA Transcriptional Coactivator And Phosphatase 1	Protein Coding	Q99502	56	GC08M071210	36.1695	https://www.genecards.org/cgi-bin/carddisp.pl?gene=EYA1
EGR1	Early Growth Response 1	Protein Coding	P18146	58	GC05P138465	36.1601	https://www.genecards.org/cgi-bin/carddisp.pl?gene=EGR1
SLC18A2	Solute Carrier Family 18 Member A2	Protein Coding	Q05940	60	GC10P135222	36.1368	https://www.genecards.org/cgi-bin/carddisp.pl?gene=SLC18A2
TLR7	Toll Like Receptor 7	Protein Coding	Q9NYK1	60	GC0XP012867	36.1297	https://www.genecards.org/cgi-bin/carddisp.pl?gene=TLR7
ST3GAL4	ST3 Beta-Galactoside Alpha-2,3-Sialyltransferase 4	Protein Coding	Q11206	56	GC11P132068	36.1263	https://www.genecards.org/cgi-bin/carddisp.pl?gene=ST3GAL4
RAD50	RAD50 Double Strand Break Repair Protein	Protein Coding	Q92878	62	GC05P132556	36.1224	https://www.genecards.org/cgi-bin/carddisp.pl?gene=RAD50
STX16	Syntaxin 16	Protein Coding	O14662	52	GC20P060732	36.1159	https://www.genecards.org/cgi-bin/carddisp.pl?gene=STX16
CLEC16A	C-Type Lectin Domain Containing 16A	Protein Coding	Q2KHT3	49	GC16P010944	36.1071	https://www.genecards.org/cgi-bin/carddisp.pl?gene=CLEC16A
PSAT1	Phosphoserine Aminotransferase 1	Protein Coding	Q9Y617	58	GC09P078297	36.0886	https://www.genecards.org/cgi-bin/carddisp.pl?gene=PSAT1
DMPK	DM1 Protein Kinase	Protein Coding	Q09013	60	GC19M045769	36.0877	https://www.genecards.org/cgi-bin/carddisp.pl?gene=DMPK
LRP1	LDL Receptor Related Protein 1	Protein Coding	Q07954	61	GC12P057128	36.0802	https://www.genecards.org/cgi-bin/carddisp.pl?gene=LRP1
L1CAM	L1 Cell Adhesion Molecule	Protein Coding	P32004	60	GC0XM153864	36.07	https://www.genecards.org/cgi-bin/carddisp.pl?gene=L1CAM
SLC35A2	Solute Carrier Family 35 Member A2	Protein Coding	P78381	52	GC0XM048903	36.0589	https://www.genecards.org/cgi-bin/carddisp.pl?gene=SLC35A2
JPH2	Junctophilin 2	Protein Coding	Q9BR39	55	GC20M044139	36.04	https://www.genecards.org/cgi-bin/carddisp.pl?gene=JPH2
PTH	Parathyroid Hormone	Protein Coding	P01270	57	GC11M013492	36.0242	https://www.genecards.org/cgi-bin/carddisp.pl?gene=PTH
STAT5A	Signal Transducer And Activator Of Transcription 5A	Protein Coding	P42229	63	GC17P042287	35.9838	https://www.genecards.org/cgi-bin/carddisp.pl?gene=STAT5A
CDK6	Cyclin Dependent Kinase 6	Protein Coding	Q00534	64	GC07M092604	35.9699	https://www.genecards.org/cgi-bin/carddisp.pl?gene=CDK6
DNAJB2	DnaJ Heat Shock Protein Family (Hsp40) Member B2	Protein Coding	P25686	54	GC02P219279	35.9667	https://www.genecards.org/cgi-bin/carddisp.pl?gene=DNAJB2
CRB2	Crumbs Cell Polarity Complex Component 2	Protein Coding	Q5IJ48	52	GC09P160551	35.9646	https://www.genecards.org/cgi-bin/carddisp.pl?gene=CRB2
KRT18	Keratin 18	Protein Coding	P05783	62	GC12P086837	35.9405	https://www.genecards.org/cgi-bin/carddisp.pl?gene=KRT18
SMARCAL1	SNF2 Related Chromatin Remodeling Annealing Helicase 1	Protein Coding	Q9NZC9	57	GC02P216412	35.938	https://www.genecards.org/cgi-bin/carddisp.pl?gene=SMARCAL1
GALNT2	Polypeptide N-Acetylgalactosaminyltransferase 2	Protein Coding	Q10471	57	GC01P230057	35.9371	https://www.genecards.org/cgi-bin/carddisp.pl?gene=GALNT2
TPO	Thyroid Peroxidase	Protein Coding	P07202	61	GC02P001484	35.9334	https://www.genecards.org/cgi-bin/carddisp.pl?gene=TPO
KLF4	KLF Transcription Factor 4	Protein Coding	O43474	60	GC09M107484	35.9325	https://www.genecards.org/cgi-bin/carddisp.pl?gene=KLF4
RAD51	RAD51 Recombinase	Protein Coding	Q06609	64	GC15P040694	35.9052	https://www.genecards.org/cgi-bin/carddisp.pl?gene=RAD51
SLC39A4	Solute Carrier Family 39 Member 4	Protein Coding	Q6P5W5	54	GC08M144409	35.8948	https://www.genecards.org/cgi-bin/carddisp.pl?gene=SLC39A4
MYBPC1	Myosin Binding Protein C1	Protein Coding	Q00872	55	GC12P101568	35.8888	https://www.genecards.org/cgi-bin/carddisp.pl?gene=MYBPC1
SPINK5	Serine Peptidase Inhibitor Kazal Type 5	Protein Coding	Q9NQ38	52	GC05P148025	35.8794	https://www.genecards.org/cgi-bin/carddisp.pl?gene=SPINK5
ATR	ATR Checkpoint Kinase	Protein Coding	Q13535	66	GC03M142449	35.868	https://www.genecards.org/cgi-bin/carddisp.pl?gene=ATR
VCL	Vinculin	Protein Coding	P18206	60	GC10P073995	35.8506	https://www.genecards.org/cgi-bin/carddisp.pl?gene=VCL
HTRA2	HtrA Serine Peptidase 2	Protein Coding	O43464	58	GC02P074529	35.7685	https://www.genecards.org/cgi-bin/carddisp.pl?gene=HTRA2
IRF1	Interferon Regulatory Factor 1	Protein Coding	P10914	59	GC05M132440	35.7582	https://www.genecards.org/cgi-bin/carddisp.pl?gene=IRF1
LDLRAP1	Low Density Lipoprotein Receptor Adaptor Protein 1	Protein Coding	Q5SW96	52	GC01P025543	35.7494	https://www.genecards.org/cgi-bin/carddisp.pl?gene=LDLRAP1
CTSB	Cathepsin B	Protein Coding	P07858	63	GC08M011842	35.7411	https://www.genecards.org/cgi-bin/carddisp.pl?gene=CTSB
OPA1	OPA1 Mitochondrial Dynamin Like GTPase	Protein Coding	O60313	56	GC03P193594	35.7381	https://www.genecards.org/cgi-bin/carddisp.pl?gene=OPA1
MIR210	MicroRNA 210	RNA Gene		30	GC11M016456	35.7065	https://www.genecards.org/cgi-bin/carddisp.pl?gene=MIR210
THBS2	Thrombospondin 2	Protein Coding	P35442	59	GC06M169215	35.6749	https://www.genecards.org/cgi-bin/carddisp.pl?gene=THBS2
GHRHR	Growth Hormone Releasing Hormone Receptor	Protein Coding	Q02643	54	GC07P030938	35.6691	https://www.genecards.org/cgi-bin/carddisp.pl?gene=GHRHR
PPT1	Palmitoyl-Protein Thioesterase 1	Protein Coding	P50897	59	GC01M042181	35.6677	https://www.genecards.org/cgi-bin/carddisp.pl?gene=PPT1
PTS	6-Pyruvoyltetrahydropterin Synthase	Protein Coding	Q03393	58	GC11P112226	35.6644	https://www.genecards.org/cgi-bin/carddisp.pl?gene=PTS
SKIC2	SKI2 Subunit Of Superkiller Complex	Protein Coding	Q15477	53	GC06P208100	35.6377	https://www.genecards.org/cgi-bin/carddisp.pl?gene=SKIC2
TINF2	TERF1 Interacting Nuclear Factor 2	Protein Coding	Q9BSI4	53	GC14M029717	35.6376	https://www.genecards.org/cgi-bin/carddisp.pl?gene=TINF2
LAMA3	Laminin Subunit Alpha 3	Protein Coding	Q16787	57	GC18P023689	35.6306	https://www.genecards.org/cgi-bin/carddisp.pl?gene=LAMA3
CALR	Calreticulin	Protein Coding	P27797	64	GC19P012938	35.6261	https://www.genecards.org/cgi-bin/carddisp.pl?gene=CALR
DPM2	Dolichyl-Phosphate Mannosyltransferase Subunit 2, Regulatory	Protein Coding	O94777	48	GC09M127935	35.6246	https://www.genecards.org/cgi-bin/carddisp.pl?gene=DPM2
BAD	BCL2 Associated Agonist Of Cell Death	Protein Coding	Q92934	57	GC11M146126	35.5967	https://www.genecards.org/cgi-bin/carddisp.pl?gene=BAD
PEX2	Peroxisomal Biogenesis Factor 2	Protein Coding	P28328	55	GC08M076980	35.5916	https://www.genecards.org/cgi-bin/carddisp.pl?gene=PEX2
VKORC1	Vitamin K Epoxide Reductase Complex Subunit 1	Protein Coding	Q9BQB6	61	GC16M056519	35.588	https://www.genecards.org/cgi-bin/carddisp.pl?gene=VKORC1
HEXB	Hexosaminidase Subunit Beta	Protein Coding	P07686	60	GC05P074640	35.5764	https://www.genecards.org/cgi-bin/carddisp.pl?gene=HEXB
NDUFV1	NADH:Ubiquinone Oxidoreductase Core Subunit V1	Protein Coding	P49821	57	GC11P130278	35.5627	https://www.genecards.org/cgi-bin/carddisp.pl?gene=NDUFV1
SIX5	SIX Homeobox 5	Protein Coding	Q8N196	50	GC19M045764	35.5597	https://www.genecards.org/cgi-bin/carddisp.pl?gene=SIX5
TRMT10A	TRNA Methyltransferase 10A	Protein Coding	Q8TBZ6	45	GC04M099546	35.5385	https://www.genecards.org/cgi-bin/carddisp.pl?gene=TRMT10A
ATP6V1A	ATPase H+ Transporting V1 Subunit A	Protein Coding	P38606	58	GC03P114031	35.5221	https://www.genecards.org/cgi-bin/carddisp.pl?gene=ATP6V1A
CLCN1	Chloride Voltage-Gated Channel 1	Protein Coding	P35523	55	GC07P143316	35.48	https://www.genecards.org/cgi-bin/carddisp.pl?gene=CLCN1
MPDU1	Mannose-P-Dolichol Utilization Defect 1	Protein Coding	O75352	53	GC17P007583	35.4731	https://www.genecards.org/cgi-bin/carddisp.pl?gene=MPDU1
TNXB	Tenascin XB	Protein Coding	P22105	55	GC06M114980	35.4444	https://www.genecards.org/cgi-bin/carddisp.pl?gene=TNXB
HERC2	HECT And RLD Domain Containing E3 Ubiquitin Protein Ligase 2	Protein Coding	O95714	57	GC15M028111	35.4391	https://www.genecards.org/cgi-bin/carddisp.pl?gene=HERC2
COG8	Component Of Oligomeric Golgi Complex 8	Protein Coding	Q96MW5	50	GC16M069320	35.4273	https://www.genecards.org/cgi-bin/carddisp.pl?gene=COG8
FGF3	Fibroblast Growth Factor 3	Protein Coding	P11487	57	GC11M146347	35.4049	https://www.genecards.org/cgi-bin/carddisp.pl?gene=FGF3
FASTKD2	FAST Kinase Domains 2	Protein Coding	Q9NYY8	50	GC02P206770	35.3702	https://www.genecards.org/cgi-bin/carddisp.pl?gene=FASTKD2
CLCNKA	Chloride Voltage-Gated Channel Ka	Protein Coding	P51800	52	GC01P016018	35.3616	https://www.genecards.org/cgi-bin/carddisp.pl?gene=CLCNKA
POLR3A	RNA Polymerase III Subunit A	Protein Coding	O14802	57	GC10M085035	35.3523	https://www.genecards.org/cgi-bin/carddisp.pl?gene=POLR3A
GPX1	Glutathione Peroxidase 1	Protein Coding	P07203	57	GC03M055295	35.3317	https://www.genecards.org/cgi-bin/carddisp.pl?gene=GPX1
CYB5R3	Cytochrome B5 Reductase 3	Protein Coding	P00387	57	GC22M090773	35.3254	https://www.genecards.org/cgi-bin/carddisp.pl?gene=CYB5R3
EDAR	Ectodysplasin A Receptor	Protein Coding	Q9UNE0	52	GC02M108894	35.322	https://www.genecards.org/cgi-bin/carddisp.pl?gene=EDAR
NEFH	Neurofilament Heavy Chain	Protein Coding	P12036	57	GC22P029480	35.3186	https://www.genecards.org/cgi-bin/carddisp.pl?gene=NEFH
PDSS2	Decaprenyl Diphosphate Synthase Subunit 2	Protein Coding	Q86YH6	52	GC06M107152	35.3074	https://www.genecards.org/cgi-bin/carddisp.pl?gene=PDSS2
BPNT2	3''(2''), 5''-Bisphosphate Nucleotidase 2	Protein Coding	Q9NX62	52	GC08M056958	35.305	https://www.genecards.org/cgi-bin/carddisp.pl?gene=BPNT2
NR2F2	Nuclear Receptor Subfamily 2 Group F Member 2	Protein Coding	P24468	60	GC15P096325	35.3025	https://www.genecards.org/cgi-bin/carddisp.pl?gene=NR2F2
ADRA2B	Adrenoceptor Alpha 2B	Protein Coding	P18089	56	GC02M096112	35.301	https://www.genecards.org/cgi-bin/carddisp.pl?gene=ADRA2B
THADA	THADA Armadillo Repeat Containing	Protein Coding	Q6YHU6	49	GC02M043319	35.29	https://www.genecards.org/cgi-bin/carddisp.pl?gene=THADA
NR1H4	Nuclear Receptor Subfamily 1 Group H Member 4	Protein Coding	Q96RI1	60	GC12P100473	35.2614	https://www.genecards.org/cgi-bin/carddisp.pl?gene=NR1H4
KLF2	KLF Transcription Factor 2	Protein Coding	Q9Y5W3	53	GC19P171191	35.2578	https://www.genecards.org/cgi-bin/carddisp.pl?gene=KLF2
NOG	Noggin	Protein Coding	Q13253	59	GC17P056593	35.2515	https://www.genecards.org/cgi-bin/carddisp.pl?gene=NOG
ARX	Aristaless Related Homeobox	Protein Coding	Q96QS3	55	GC0XM025003	35.2277	https://www.genecards.org/cgi-bin/carddisp.pl?gene=ARX
ANKRD26	Ankyrin Repeat Domain Containing 26	Protein Coding	Q9UPS8	50	GC10M026947	35.2153	https://www.genecards.org/cgi-bin/carddisp.pl?gene=ANKRD26
CPE	Carboxypeptidase E	Protein Coding	P16870	60	GC04P165361	35.2103	https://www.genecards.org/cgi-bin/carddisp.pl?gene=CPE
LIG4	DNA Ligase 4	Protein Coding	P49917	60	GC13M108207	35.2102	https://www.genecards.org/cgi-bin/carddisp.pl?gene=LIG4
CELSR2	Cadherin EGF LAG Seven-Pass G-Type Receptor 2	Protein Coding	Q9HCU4	52	GC01P113747	35.2041	https://www.genecards.org/cgi-bin/carddisp.pl?gene=CELSR2
SPAST	Spastin	Protein Coding	Q9UBP0	54	GC02P032063	35.1953	https://www.genecards.org/cgi-bin/carddisp.pl?gene=SPAST
TRPV3	Transient Receptor Potential Cation Channel Subfamily V Member 3	Protein Coding	Q8NET8	55	GC17M103542	35.1868	https://www.genecards.org/cgi-bin/carddisp.pl?gene=TRPV3
DPM3	Dolichyl-Phosphate Mannosyltransferase Subunit 3, Regulatory	Protein Coding	Q9P2X0	52	GC01M155139	35.1587	https://www.genecards.org/cgi-bin/carddisp.pl?gene=DPM3
GABRA1	Gamma-Aminobutyric Acid Type A Receptor Subunit Alpha1	Protein Coding	P14867	60	GC05P161847	35.1527	https://www.genecards.org/cgi-bin/carddisp.pl?gene=GABRA1
ATP8A2	ATPase Phospholipid Transporting 8A2	Protein Coding	Q9NTI2	51	GC13P029569	35.15	https://www.genecards.org/cgi-bin/carddisp.pl?gene=ATP8A2
AGK	Acylglycerol Kinase	Protein Coding	Q53H12	52	GC07P141551	35.1146	https://www.genecards.org/cgi-bin/carddisp.pl?gene=AGK
RASGRP1	RAS Guanyl Releasing Protein 1	Protein Coding	O95267	57	GC15M038488	35.1011	https://www.genecards.org/cgi-bin/carddisp.pl?gene=RASGRP1
CACNA1E	Calcium Voltage-Gated Channel Subunit Alpha1 E	Protein Coding	Q15878	60	GC01P181317	35.0982	https://www.genecards.org/cgi-bin/carddisp.pl?gene=CACNA1E
EVC2	EvC Ciliary Complex Subunit 2	Protein Coding	Q86UK5	50	GC04M007278	35.0952	https://www.genecards.org/cgi-bin/carddisp.pl?gene=EVC2
TOP2A	DNA Topoisomerase II Alpha	Protein Coding	P11388	63	GC17M040388	35.0723	https://www.genecards.org/cgi-bin/carddisp.pl?gene=TOP2A
FGF21	Fibroblast Growth Factor 21	Protein Coding	Q9NSA1	52	GC19P171964	35.07	https://www.genecards.org/cgi-bin/carddisp.pl?gene=FGF21
SPOP	Speckle Type BTB/POZ Protein	Protein Coding	O43791	56	GC17M049598	35.0598	https://www.genecards.org/cgi-bin/carddisp.pl?gene=SPOP
TRPV1	Transient Receptor Potential Cation Channel Subfamily V Member 1	Protein Coding	Q8NER1	61	GC17M003565	35.0569	https://www.genecards.org/cgi-bin/carddisp.pl?gene=TRPV1
SIRT3	Sirtuin 3	Protein Coding	Q9NTG7	60	GC11M000215	35.046	https://www.genecards.org/cgi-bin/carddisp.pl?gene=SIRT3
PNLIPRP1	Pancreatic Lipase Related Protein 1	Protein Coding	P54315	51	GC10P116590	35.0439	https://www.genecards.org/cgi-bin/carddisp.pl?gene=PNLIPRP1
PIGT	Phosphatidylinositol Glycan Anchor Biosynthesis Class T	Protein Coding	Q969N2	51	GC20P045416	35.0402	https://www.genecards.org/cgi-bin/carddisp.pl?gene=PIGT
WDR45	WD Repeat Domain 45	Protein Coding	Q9Y484	51	GC0XM049074	35.0399	https://www.genecards.org/cgi-bin/carddisp.pl?gene=WDR45
CAMK1D	Calcium/Calmodulin Dependent Protein Kinase ID	Protein Coding	Q8IU85	53	GC10P012349	35.0385	https://www.genecards.org/cgi-bin/carddisp.pl?gene=CAMK1D
SLC26A4	Solute Carrier Family 26 Member 4	Protein Coding	O43511	55	GC07P107660	35.0344	https://www.genecards.org/cgi-bin/carddisp.pl?gene=SLC26A4
BRIP1	BRCA1 Interacting DNA Helicase 1	Protein Coding	Q9BX63	61	GC17M061679	35.0329	https://www.genecards.org/cgi-bin/carddisp.pl?gene=BRIP1
SLC30A10	Solute Carrier Family 30 Member 10	Protein Coding	Q6XR72	54	GC01M219685	35.0245	https://www.genecards.org/cgi-bin/carddisp.pl?gene=SLC30A10
HDAC4	Histone Deacetylase 4	Protein Coding	P56524	64	GC02M239048	34.9994	https://www.genecards.org/cgi-bin/carddisp.pl?gene=HDAC4
ZIC2	Zic Family Zinc Finger 2	Protein Coding	O95409	55	GC13P099981	34.991	https://www.genecards.org/cgi-bin/carddisp.pl?gene=ZIC2
NCF4	Neutrophil Cytosolic Factor 4	Protein Coding	Q15080	60	GC22P036860	34.9842	https://www.genecards.org/cgi-bin/carddisp.pl?gene=NCF4
SSTR2	Somatostatin Receptor 2	Protein Coding	P30874	60	GC17P073165	34.9666	https://www.genecards.org/cgi-bin/carddisp.pl?gene=SSTR2
NFKB2	Nuclear Factor Kappa B Subunit 2	Protein Coding	Q00653	65	GC10P102394	34.962	https://www.genecards.org/cgi-bin/carddisp.pl?gene=NFKB2
MUC2	Mucin 2, Oligomeric Mucus/Gel-Forming	Protein Coding	Q02817	52	GC11P001074	34.9548	https://www.genecards.org/cgi-bin/carddisp.pl?gene=MUC2
PDCD1LG2	Programmed Cell Death 1 Ligand 2	Protein Coding	Q9BQ51	56	GC09P005510	34.9394	https://www.genecards.org/cgi-bin/carddisp.pl?gene=PDCD1LG2
ACTC1	Actin Alpha Cardiac Muscle 1	Protein Coding	P68032	57	GC15M034790	34.9239	https://www.genecards.org/cgi-bin/carddisp.pl?gene=ACTC1
CKM	Creatine Kinase, M-Type	Protein Coding	P06732	58	GC19M045306	34.8971	https://www.genecards.org/cgi-bin/carddisp.pl?gene=CKM
FMR1	Fragile X Messenger Ribonucleoprotein 1	Protein Coding	Q06787	56	GC0XP148000	34.8901	https://www.genecards.org/cgi-bin/carddisp.pl?gene=FMR1
GFM1	G Elongation Factor Mitochondrial 1	Protein Coding	Q96RP9	55	GC03P158644	34.8687	https://www.genecards.org/cgi-bin/carddisp.pl?gene=GFM1
EGLN1	Egl-9 Family Hypoxia Inducible Factor 1	Protein Coding	Q9GZT9	63	GC01M231363	34.8516	https://www.genecards.org/cgi-bin/carddisp.pl?gene=EGLN1
MYH2	Myosin Heavy Chain 2	Protein Coding	Q9UKX2	57	GC17M010521	34.846	https://www.genecards.org/cgi-bin/carddisp.pl?gene=MYH2
CYB5A	Cytochrome B5 Type A	Protein Coding	P00167	55	GC18M074250	34.8447	https://www.genecards.org/cgi-bin/carddisp.pl?gene=CYB5A
POLR3B	RNA Polymerase III Subunit B	Protein Coding	Q9NW08	55	GC12P106357	34.8356	https://www.genecards.org/cgi-bin/carddisp.pl?gene=POLR3B
MT-CO2	Mitochondrially Encoded Cytochrome C Oxidase II	Protein Coding	P00403	51	GCMTP007587	34.8317	https://www.genecards.org/cgi-bin/carddisp.pl?gene=MT-CO2
RRAD	RRAD, Ras Related Glycolysis Inhibitor And Calcium Channel Regulator	Protein Coding	P55042	50	GC16M076466	34.8312	https://www.genecards.org/cgi-bin/carddisp.pl?gene=RRAD
TOE1	Target Of EGR1, Exonuclease	Protein Coding	Q96GM8	50	GC01P095041	34.806	https://www.genecards.org/cgi-bin/carddisp.pl?gene=TOE1
CNP	2'''',3''''-Cyclic Nucleotide 3'''' Phosphodiesterase	Protein Coding	P09543	56	GC17P041966	34.8003	https://www.genecards.org/cgi-bin/carddisp.pl?gene=CNP
DLG4	Discs Large MAGUK Scaffold Protein 4	Protein Coding	P78352	61	GC17M103722	34.7967	https://www.genecards.org/cgi-bin/carddisp.pl?gene=DLG4
CCL11	C-C Motif Chemokine Ligand 11	Protein Coding	P51671	58	GC17P034285	34.7941	https://www.genecards.org/cgi-bin/carddisp.pl?gene=CCL11
PPARD	Peroxisome Proliferator Activated Receptor Delta	Protein Coding	Q03181	59	GC06P199637	34.7794	https://www.genecards.org/cgi-bin/carddisp.pl?gene=PPARD
ANGPTL4	Angiopoietin Like 4	Protein Coding	Q9BY76	55	GC19P008363	34.7712	https://www.genecards.org/cgi-bin/carddisp.pl?gene=ANGPTL4
C4A	Complement C4A (Chido/Rodgers Blood Group)	Protein Coding	P0C0L4	57	GC06P199549	34.7691	https://www.genecards.org/cgi-bin/carddisp.pl?gene=C4A
STAR	Steroidogenic Acute Regulatory Protein	Protein Coding	P49675	57	GC08M038965	34.7649	https://www.genecards.org/cgi-bin/carddisp.pl?gene=STAR
MESP2	Mesoderm Posterior BHLH Transcription Factor 2	Protein Coding	Q0VG99	45	GC15P211454	34.7598	https://www.genecards.org/cgi-bin/carddisp.pl?gene=MESP2
ABL1	ABL Proto-Oncogene 1, Non-Receptor Tyrosine Kinase	Protein Coding	P00519	66	GC09P130713	34.7526	https://www.genecards.org/cgi-bin/carddisp.pl?gene=ABL1
TMEM43	Transmembrane Protein 43	Protein Coding	Q9BTV4	54	GC03P030274	34.7522	https://www.genecards.org/cgi-bin/carddisp.pl?gene=TMEM43
CLU	Clusterin	Protein Coding	P10909	60	GC08M027596	34.7393	https://www.genecards.org/cgi-bin/carddisp.pl?gene=CLU
DHCR7	7-Dehydrocholesterol Reductase	Protein Coding	Q9UBM7	60	GC11M146366	34.7346	https://www.genecards.org/cgi-bin/carddisp.pl?gene=DHCR7
PPARGC1B	PPARG Coactivator 1 Beta	Protein Coding	Q86YN6	48	GC05P162693	34.7309	https://www.genecards.org/cgi-bin/carddisp.pl?gene=PPARGC1B
P2RY12	Purinergic Receptor P2Y12	Protein Coding	Q9H244	60	GC03M151336	34.6775	https://www.genecards.org/cgi-bin/carddisp.pl?gene=P2RY12
C2	Complement C2	Protein Coding	P06681	58	GC06P031897	34.6569	https://www.genecards.org/cgi-bin/carddisp.pl?gene=C2
NR2E3	Nuclear Receptor Subfamily 2 Group E Member 3	Protein Coding	Q9Y5X4	54	GC15P071792	34.656	https://www.genecards.org/cgi-bin/carddisp.pl?gene=NR2E3
ADCY5	Adenylate Cyclase 5	Protein Coding	O95622	60	GC03M123282	34.6498	https://www.genecards.org/cgi-bin/carddisp.pl?gene=ADCY5
CD27	CD27 Molecule	Protein Coding	P26842	59	GC12P085695	34.6361	https://www.genecards.org/cgi-bin/carddisp.pl?gene=CD27
CDH2	Cadherin 2	Protein Coding	P19022	64	GC18M040187	34.6295	https://www.genecards.org/cgi-bin/carddisp.pl?gene=CDH2
RAC1	Rac Family Small GTPase 1	Protein Coding	P63000	61	GC07P031790	34.6265	https://www.genecards.org/cgi-bin/carddisp.pl?gene=RAC1
SERPINA12	Serpin Family A Member 12	Protein Coding	Q8IW75	51	GC14M094487	34.5917	https://www.genecards.org/cgi-bin/carddisp.pl?gene=SERPINA12
PCCB	Propionyl-CoA Carboxylase Subunit Beta	Protein Coding	P05166	59	GC03P136250	34.5871	https://www.genecards.org/cgi-bin/carddisp.pl?gene=PCCB
CRYAB	Crystallin Alpha B	Protein Coding	P02511	58	GC11M111908	34.5844	https://www.genecards.org/cgi-bin/carddisp.pl?gene=CRYAB
GCH1	GTP Cyclohydrolase 1	Protein Coding	P30793	60	GC14M054842	34.5817	https://www.genecards.org/cgi-bin/carddisp.pl?gene=GCH1
RS1	Retinoschisin 1	Protein Coding	O15537	52	GC0XM018639	34.5677	https://www.genecards.org/cgi-bin/carddisp.pl?gene=RS1
DCN	Decorin	Protein Coding	P07585	60	GC12M091140	34.5547	https://www.genecards.org/cgi-bin/carddisp.pl?gene=DCN
CSF1R	Colony Stimulating Factor 1 Receptor	Protein Coding	P07333	64	GC05M150053	34.5447	https://www.genecards.org/cgi-bin/carddisp.pl?gene=CSF1R
HLA-DPB1	Major Histocompatibility Complex, Class II, DP Beta 1	Protein Coding	P04440	58	GC06P199564	34.5311	https://www.genecards.org/cgi-bin/carddisp.pl?gene=HLA-DPB1
AMACR	Alpha-Methylacyl-CoA Racemase	Protein Coding	Q9UHK6	57	GC05M033986	34.5242	https://www.genecards.org/cgi-bin/carddisp.pl?gene=AMACR
PROKR2	Prokineticin Receptor 2	Protein Coding	Q8NFJ6	53	GC20M011265	34.5198	https://www.genecards.org/cgi-bin/carddisp.pl?gene=PROKR2
GRIN2A	Glutamate Ionotropic Receptor NMDA Type Subunit 2A	Protein Coding	Q12879	64	GC16M009753	34.515	https://www.genecards.org/cgi-bin/carddisp.pl?gene=GRIN2A
CSNK2A1	Casein Kinase 2 Alpha 1	Protein Coding	P68400	63	GC20M000472	34.5139	https://www.genecards.org/cgi-bin/carddisp.pl?gene=CSNK2A1
NDUFS1	NADH:Ubiquinone Oxidoreductase Core Subunit S1	Protein Coding	P28331	57	GC02M206114	34.4969	https://www.genecards.org/cgi-bin/carddisp.pl?gene=NDUFS1
AUH	AU RNA Binding Methylglutaconyl-CoA Hydratase	Protein Coding	Q13825	54	GC09M091213	34.4961	https://www.genecards.org/cgi-bin/carddisp.pl?gene=AUH
MTM1	Myotubularin 1	Protein Coding	Q13496	55	GC0XP150562	34.4893	https://www.genecards.org/cgi-bin/carddisp.pl?gene=MTM1
TBP	TATA-Box Binding Protein	Protein Coding	P20226	61	GC06P170554	34.452	https://www.genecards.org/cgi-bin/carddisp.pl?gene=TBP
ABCC1	ATP Binding Cassette Subfamily C Member 1 (ABCC1 Blood Group)	Protein Coding	P33527	61	GC16P015949	34.4466	https://www.genecards.org/cgi-bin/carddisp.pl?gene=ABCC1
ICOS	Inducible T Cell Costimulator	Protein Coding	Q9Y6W8	57	GC02P205375	34.44	https://www.genecards.org/cgi-bin/carddisp.pl?gene=ICOS
CCND2	Cyclin D2	Protein Coding	P30279	60	GC12P085668	34.4369	https://www.genecards.org/cgi-bin/carddisp.pl?gene=CCND2
EPHX2	Epoxide Hydrolase 2	Protein Coding	P34913	59	GC08P027490	34.4324	https://www.genecards.org/cgi-bin/carddisp.pl?gene=EPHX2
AGRN	Agrin	Protein Coding	O00468	57	GC01P001020	34.4282	https://www.genecards.org/cgi-bin/carddisp.pl?gene=AGRN
ATP6AP1	ATPase H+ Transporting Accessory Protein 1	Protein Coding	Q15904	57	GC0XP154428	34.4281	https://www.genecards.org/cgi-bin/carddisp.pl?gene=ATP6AP1
TRAF2	TNF Receptor Associated Factor 2	Protein Coding	Q12933	58	GC09P136881	34.4205	https://www.genecards.org/cgi-bin/carddisp.pl?gene=TRAF2
TGIF1	TGFB Induced Factor Homeobox 1	Protein Coding	Q15583	57	GC18P003411	34.4013	https://www.genecards.org/cgi-bin/carddisp.pl?gene=TGIF1
COQ2	Coenzyme Q2, Polyprenyltransferase	Protein Coding	Q96H96	52	GC04M083261	34.396	https://www.genecards.org/cgi-bin/carddisp.pl?gene=COQ2
FREM1	FRAS1 Related Extracellular Matrix 1	Protein Coding	Q5H8C1	52	GC09M014734	34.3957	https://www.genecards.org/cgi-bin/carddisp.pl?gene=FREM1
CYP1A1	Cytochrome P450 Family 1 Subfamily A Member 1	Protein Coding	P04798	60	GC15M074719	34.3948	https://www.genecards.org/cgi-bin/carddisp.pl?gene=CYP1A1
YAP1	Yes1 Associated Transcriptional Regulator	Protein Coding	P46937	61	GC11P102110	34.3669	https://www.genecards.org/cgi-bin/carddisp.pl?gene=YAP1
SDHAF1	Succinate Dehydrogenase Complex Assembly Factor 1	Protein Coding	A6NFY7	47	GC19P035995	34.3625	https://www.genecards.org/cgi-bin/carddisp.pl?gene=SDHAF1
SMARCA2	SWI/SNF Related BAF Chromatin Remodeling Complex Subunit ATPase 2	Protein Coding	P51531	63	GC09P001980	34.3549	https://www.genecards.org/cgi-bin/carddisp.pl?gene=SMARCA2
FOXE3	Forkhead Box E3	Protein Coding	Q13461	48	GC01P047416	34.3532	https://www.genecards.org/cgi-bin/carddisp.pl?gene=FOXE3
PLCB2	Phospholipase C Beta 2	Protein Coding	Q00722	58	GC15M040278	34.3468	https://www.genecards.org/cgi-bin/carddisp.pl?gene=PLCB2
DDIT3	DNA Damage Inducible Transcript 3	Protein Coding	P35638	58	GC12M057516	34.338	https://www.genecards.org/cgi-bin/carddisp.pl?gene=DDIT3
ACTN2	Actinin Alpha 2	Protein Coding	P35609	59	GC01P236686	34.3149	https://www.genecards.org/cgi-bin/carddisp.pl?gene=ACTN2
VAMP2	Vesicle Associated Membrane Protein 2	Protein Coding	P63027	58	GC17M103776	34.3043	https://www.genecards.org/cgi-bin/carddisp.pl?gene=VAMP2
XPA	XPA, DNA Damage Recognition And Repair Factor	Protein Coding	P23025	57	GC09M097654	34.2485	https://www.genecards.org/cgi-bin/carddisp.pl?gene=XPA
PGK1	Phosphoglycerate Kinase 1	Protein Coding	P00558	61	GC0XP078298	34.2469	https://www.genecards.org/cgi-bin/carddisp.pl?gene=PGK1
TWIST2	Twist Family BHLH Transcription Factor 2	Protein Coding	Q8WVJ9	54	GC02P238848	34.2267	https://www.genecards.org/cgi-bin/carddisp.pl?gene=TWIST2
FLNC	Filamin C	Protein Coding	Q14315	57	GC07P128830	34.215	https://www.genecards.org/cgi-bin/carddisp.pl?gene=FLNC
PDP1	Pyruvate Dehydrogenase Phosphatase Catalytic Subunit 1	Protein Coding	Q9P0J1	60	GC08P093857	34.2084	https://www.genecards.org/cgi-bin/carddisp.pl?gene=PDP1
NDUFS7	NADH:Ubiquinone Oxidoreductase Core Subunit S7	Protein Coding	O75251	57	GC19P170536	34.2039	https://www.genecards.org/cgi-bin/carddisp.pl?gene=NDUFS7
DLK1	Delta Like Non-Canonical Notch Ligand 1	Protein Coding	P80370	58	GC14P122738	34.1136	https://www.genecards.org/cgi-bin/carddisp.pl?gene=DLK1
STT3B	STT3 Oligosaccharyltransferase Complex Catalytic Subunit B	Protein Coding	Q8TCJ2	55	GC03P031532	34.1107	https://www.genecards.org/cgi-bin/carddisp.pl?gene=STT3B
CALM3	Calmodulin 3	Protein Coding	P0DP25	54	GC19P046601	34.1095	https://www.genecards.org/cgi-bin/carddisp.pl?gene=CALM3
BBS10	Bardet-Biedl Syndrome 10	Protein Coding	Q8TAM1	51	GC12M076344	34.0832	https://www.genecards.org/cgi-bin/carddisp.pl?gene=BBS10
TCTN1	Tectonic Family Member 1	Protein Coding	Q2MV58	50	GC12P110614	34.0807	https://www.genecards.org/cgi-bin/carddisp.pl?gene=TCTN1
GYS2	Glycogen Synthase 2	Protein Coding	P54840	57	GC12M039161	34.0565	https://www.genecards.org/cgi-bin/carddisp.pl?gene=GYS2
LARS2	Leucyl-TRNA Synthetase 2, Mitochondrial	Protein Coding	Q15031	57	GC03P069044	34.0317	https://www.genecards.org/cgi-bin/carddisp.pl?gene=LARS2
STT3A	STT3 Oligosaccharyltransferase Complex Catalytic Subunit A	Protein Coding	P46977	57	GC11P132031	34.0242	https://www.genecards.org/cgi-bin/carddisp.pl?gene=STT3A
NFIX	Nuclear Factor I X	Protein Coding	Q14938	55	GC19P171067	33.9827	https://www.genecards.org/cgi-bin/carddisp.pl?gene=NFIX
PDE5A	Phosphodiesterase 5A	Protein Coding	O76074	58	GC04M119494	33.9775	https://www.genecards.org/cgi-bin/carddisp.pl?gene=PDE5A
NBAS	NBAS Subunit Of NRZ Tethering Complex	Protein Coding	A2RRP1	51	GC02M014806	33.9769	https://www.genecards.org/cgi-bin/carddisp.pl?gene=NBAS
GSTM1	Glutathione S-Transferase Mu 1	Protein Coding	P09488	56	GC01P109687	33.9725	https://www.genecards.org/cgi-bin/carddisp.pl?gene=GSTM1
NCF1	Neutrophil Cytosolic Factor 1	Protein Coding	P14598	59	GC07P074773	33.9715	https://www.genecards.org/cgi-bin/carddisp.pl?gene=NCF1
AXDND1	Axonemal Dynein Light Chain Domain Containing 1	Protein Coding	Q5T1B0	45	GC01P184602	33.967	https://www.genecards.org/cgi-bin/carddisp.pl?gene=AXDND1
PFKFB3	6-Phosphofructo-2-Kinase/Fructose-2,6-Biphosphatase 3	Protein Coding	Q16875	55	GC10P006144	33.9476	https://www.genecards.org/cgi-bin/carddisp.pl?gene=PFKFB3
GCM2	Glial Cells Missing Transcription Factor 2	Protein Coding	O75603	52	GC06M010873	33.9458	https://www.genecards.org/cgi-bin/carddisp.pl?gene=GCM2
FADD	Fas Associated Via Death Domain	Protein Coding	Q13158	58	GC11P070203	33.9312	https://www.genecards.org/cgi-bin/carddisp.pl?gene=FADD
OPRM1	Opioid Receptor Mu 1	Protein Coding	P35372	61	GC06P201346	33.9212	https://www.genecards.org/cgi-bin/carddisp.pl?gene=OPRM1
TTBK2	Tau Tubulin Kinase 2	Protein Coding	Q6IQ55	57	GC15M042738	33.9079	https://www.genecards.org/cgi-bin/carddisp.pl?gene=TTBK2
PPP2R1A	Protein Phosphatase 2 Scaffold Subunit Aalpha	Protein Coding	P30153	59	GC19P172122	33.8957	https://www.genecards.org/cgi-bin/carddisp.pl?gene=PPP2R1A
NRP1	Neuropilin 1	Protein Coding	O14786	62	GC10M033177	33.8831	https://www.genecards.org/cgi-bin/carddisp.pl?gene=NRP1
ATP10A	ATPase Phospholipid Transporting 10A (Putative)	Protein Coding	O60312	55	GC15M050764	33.8609	https://www.genecards.org/cgi-bin/carddisp.pl?gene=ATP10A
JUP	Junction Plakoglobin	Protein Coding	P14923	60	GC17M104727	33.8519	https://www.genecards.org/cgi-bin/carddisp.pl?gene=JUP
CASP1	Caspase 1	Protein Coding	P29466	61	GC11M146827	33.8362	https://www.genecards.org/cgi-bin/carddisp.pl?gene=CASP1
ITGB4	Integrin Subunit Beta 4	Protein Coding	P16144	61	GC17P075721	33.8235	https://www.genecards.org/cgi-bin/carddisp.pl?gene=ITGB4
PLIN4	Perilipin 4	Protein Coding	Q96Q06	48	GC19M115438	33.7983	https://www.genecards.org/cgi-bin/carddisp.pl?gene=PLIN4
MEFV	MEFV Innate Immunity Regulator, Pyrin	Protein Coding	O15553	55	GC16M055281	33.7967	https://www.genecards.org/cgi-bin/carddisp.pl?gene=MEFV
GAL	Galanin And GMAP Prepropeptide	Protein Coding	P22466	57	GC11P130414	33.794	https://www.genecards.org/cgi-bin/carddisp.pl?gene=GAL
ITLN1	Intelectin 1	Protein Coding	Q8WWA0	51	GC01M160876	33.7853	https://www.genecards.org/cgi-bin/carddisp.pl?gene=ITLN1
SCN2B	Sodium Voltage-Gated Channel Beta Subunit 2	Protein Coding	O60939	57	GC11M147008	33.7471	https://www.genecards.org/cgi-bin/carddisp.pl?gene=SCN2B
DDC	Dopa Decarboxylase	Protein Coding	P20711	62	GC07M050458	33.7469	https://www.genecards.org/cgi-bin/carddisp.pl?gene=DDC
SP7	Sp7 Transcription Factor	Protein Coding	Q8TDD2	55	GC12M053326	33.7463	https://www.genecards.org/cgi-bin/carddisp.pl?gene=SP7
OTOF	Otoferlin	Protein Coding	Q9HC10	50	GC02M027055	33.7412	https://www.genecards.org/cgi-bin/carddisp.pl?gene=OTOF
CD69	CD69 Molecule	Protein Coding	Q07108	54	GC12M038935	33.7319	https://www.genecards.org/cgi-bin/carddisp.pl?gene=CD69
FGF10	Fibroblast Growth Factor 10	Protein Coding	O15520	60	GC05M045403	33.7313	https://www.genecards.org/cgi-bin/carddisp.pl?gene=FGF10
BSG	Basigin (Ok Blood Group)	Protein Coding	P35613	57	GC19P000571	33.7226	https://www.genecards.org/cgi-bin/carddisp.pl?gene=BSG
CLN5	CLN5 Lysosomal BMP Synthase	Protein Coding	O75503	52	GC13P076990	33.7203	https://www.genecards.org/cgi-bin/carddisp.pl?gene=CLN5
KCNJ10	Potassium Inwardly Rectifying Channel Subfamily J Member 10	Protein Coding	P78508	58	GC01M159998	33.7171	https://www.genecards.org/cgi-bin/carddisp.pl?gene=KCNJ10
APLN	Apelin	Protein Coding	Q9ULZ1	49	GC0XM129645	33.6827	https://www.genecards.org/cgi-bin/carddisp.pl?gene=APLN
SOS2	SOS Ras/Rho Guanine Nucleotide Exchange Factor 2	Protein Coding	Q07890	57	GC14M050117	33.6794	https://www.genecards.org/cgi-bin/carddisp.pl?gene=SOS2
PIP5K1C	Phosphatidylinositol-4-Phosphate 5-Kinase Type 1 Gamma	Protein Coding	O60331	59	GC19M115409	33.6728	https://www.genecards.org/cgi-bin/carddisp.pl?gene=PIP5K1C
GJB6	Gap Junction Protein Beta 6	Protein Coding	O95452	54	GC13M020221	33.6671	https://www.genecards.org/cgi-bin/carddisp.pl?gene=GJB6
HSPB3	Heat Shock Protein Family B (Small) Member 3	Protein Coding	Q12988	51	GC05P055132	33.6586	https://www.genecards.org/cgi-bin/carddisp.pl?gene=HSPB3
ATP2B2	ATPase Plasma Membrane Ca2+ Transporting 2	Protein Coding	Q01814	60	GC03M010324	33.6562	https://www.genecards.org/cgi-bin/carddisp.pl?gene=ATP2B2
PHGDH	Phosphoglycerate Dehydrogenase	Protein Coding	O43175	62	GC01P119839	33.6417	https://www.genecards.org/cgi-bin/carddisp.pl?gene=PHGDH
DGUOK	Deoxyguanosine Kinase	Protein Coding	Q16854	55	GC02P073926	33.63	https://www.genecards.org/cgi-bin/carddisp.pl?gene=DGUOK
FGB	Fibrinogen Beta Chain	Protein Coding	P02675	59	GC04P154828	33.6105	https://www.genecards.org/cgi-bin/carddisp.pl?gene=FGB
CCK	Cholecystokinin	Protein Coding	P06307	56	GC03M042274	33.577	https://www.genecards.org/cgi-bin/carddisp.pl?gene=CCK
KARS1	Lysyl-TRNA Synthetase 1	Protein Coding	Q15046	57	GC16M076765	33.5633	https://www.genecards.org/cgi-bin/carddisp.pl?gene=KARS1
NPHP4	Nephrocystin 4	Protein Coding	O75161	51	GC01M039783	33.5509	https://www.genecards.org/cgi-bin/carddisp.pl?gene=NPHP4
PRKDC	Protein Kinase, DNA-Activated, Catalytic Subunit	Protein Coding	P78527	63	GC08M047773	33.5121	https://www.genecards.org/cgi-bin/carddisp.pl?gene=PRKDC
SLC12A6	Solute Carrier Family 12 Member 6	Protein Coding	Q9UHW9	59	GC15M034229	33.5112	https://www.genecards.org/cgi-bin/carddisp.pl?gene=SLC12A6
CSF3	Colony Stimulating Factor 3	Protein Coding	P09919	55	GC17P040015	33.508	https://www.genecards.org/cgi-bin/carddisp.pl?gene=CSF3
CDK5	Cyclin Dependent Kinase 5	Protein Coding	Q00535	66	GC07M151053	33.5059	https://www.genecards.org/cgi-bin/carddisp.pl?gene=CDK5
ATXN1	Ataxin 1	Protein Coding	P54253	56	GC06M016299	33.4913	https://www.genecards.org/cgi-bin/carddisp.pl?gene=ATXN1
CHD7	Chromodomain Helicase DNA Binding Protein 7	Protein Coding	Q9P2D1	57	GC08P060678	33.4857	https://www.genecards.org/cgi-bin/carddisp.pl?gene=CHD7
RNF213	Ring Finger Protein 213	Protein Coding	Q63HN8	50	GC17P080260	33.4679	https://www.genecards.org/cgi-bin/carddisp.pl?gene=RNF213
GRID2	Glutamate Ionotropic Receptor Delta Type Subunit 2	Protein Coding	O43424	58	GC04P092304	33.4637	https://www.genecards.org/cgi-bin/carddisp.pl?gene=GRID2
BIRC3	Baculoviral IAP Repeat Containing 3	Protein Coding	Q13489	60	GC11P102317	33.4578	https://www.genecards.org/cgi-bin/carddisp.pl?gene=BIRC3
NEK8	NIMA Related Kinase 8	Protein Coding	Q86SG6	51	GC17P028725	33.4571	https://www.genecards.org/cgi-bin/carddisp.pl?gene=NEK8
CRH	Corticotropin Releasing Hormone	Protein Coding	P06850	55	GC08M066176	33.4569	https://www.genecards.org/cgi-bin/carddisp.pl?gene=CRH
TRAF6	TNF Receptor Associated Factor 6	Protein Coding	Q9Y4K3	58	GC11M036467	33.4551	https://www.genecards.org/cgi-bin/carddisp.pl?gene=TRAF6
TJP2	Tight Junction Protein 2	Protein Coding	Q9UDY2	57	GC09P069121	33.4487	https://www.genecards.org/cgi-bin/carddisp.pl?gene=TJP2
CNR2	Cannabinoid Receptor 2	Protein Coding	P34972	57	GC01M023870	33.4451	https://www.genecards.org/cgi-bin/carddisp.pl?gene=CNR2
PTPRO	Protein Tyrosine Phosphatase Receptor Type O	Protein Coding	Q16827	58	GC12P085990	33.4411	https://www.genecards.org/cgi-bin/carddisp.pl?gene=PTPRO
NDUFS8	NADH:Ubiquinone Oxidoreductase Core Subunit S8	Protein Coding	O00217	56	GC11P068030	33.4196	https://www.genecards.org/cgi-bin/carddisp.pl?gene=NDUFS8
MAF	MAF BZIP Transcription Factor	Protein Coding	O75444	57	GC16M079204	33.4193	https://www.genecards.org/cgi-bin/carddisp.pl?gene=MAF
NDUFAF5	NADH:Ubiquinone Oxidoreductase Complex Assembly Factor 5	Protein Coding	Q5TEU4	48	GC20P014096	33.4129	https://www.genecards.org/cgi-bin/carddisp.pl?gene=NDUFAF5
PIEZO1	Piezo Type Mechanosensitive Ion Channel Component 1 (Er Blood Group)	Protein Coding	Q92508	51	GC16M088715	33.3875	https://www.genecards.org/cgi-bin/carddisp.pl?gene=PIEZO1
PRDM5	PR/SET Domain 5	Protein Coding	Q9NQX1	47	GC04M121565	33.36	https://www.genecards.org/cgi-bin/carddisp.pl?gene=PRDM5
CDK1	Cyclin Dependent Kinase 1	Protein Coding	P06493	60	GC10P060772	33.358	https://www.genecards.org/cgi-bin/carddisp.pl?gene=CDK1
MYBPC3	Myosin Binding Protein C3	Protein Coding	Q14896	58	GC11M145857	33.3578	https://www.genecards.org/cgi-bin/carddisp.pl?gene=MYBPC3
GPBAR1	G Protein-Coupled Bile Acid Receptor 1	Protein Coding	Q8TDU6	52	GC02P218259	33.3445	https://www.genecards.org/cgi-bin/carddisp.pl?gene=GPBAR1
KCND2	Potassium Voltage-Gated Channel Subfamily D Member 2	Protein Coding	Q9NZV8	56	GC07P120273	33.3416	https://www.genecards.org/cgi-bin/carddisp.pl?gene=KCND2
HLA-G	Major Histocompatibility Complex, Class I, G	Protein Coding	P17693	57	GC06P199480	33.3117	https://www.genecards.org/cgi-bin/carddisp.pl?gene=HLA-G
SORD	Sorbitol Dehydrogenase	Protein Coding	Q00796	60	GC15P045023	33.3053	https://www.genecards.org/cgi-bin/carddisp.pl?gene=SORD
PBX1	PBX Homeobox 1	Protein Coding	P40424	60	GC01P184090	33.2471	https://www.genecards.org/cgi-bin/carddisp.pl?gene=PBX1
PGAM2	Phosphoglycerate Mutase 2	Protein Coding	P15259	55	GC07M044062	33.2427	https://www.genecards.org/cgi-bin/carddisp.pl?gene=PGAM2
FLG	Filaggrin	Protein Coding	P20930	54	GC01M169655	33.2364	https://www.genecards.org/cgi-bin/carddisp.pl?gene=FLG
ATP6V1E1	ATPase H+ Transporting V1 Subunit E1	Protein Coding	P36543	58	GC22M017592	33.1982	https://www.genecards.org/cgi-bin/carddisp.pl?gene=ATP6V1E1
GRIA2	Glutamate Ionotropic Receptor AMPA Type Subunit 2	Protein Coding	P42262	64	GC04P157204	33.1768	https://www.genecards.org/cgi-bin/carddisp.pl?gene=GRIA2
FGFR4	Fibroblast Growth Factor Receptor 4	Protein Coding	P22455	64	GC05P177086	33.1499	https://www.genecards.org/cgi-bin/carddisp.pl?gene=FGFR4
ETFB	Electron Transfer Flavoprotein Subunit Beta	Protein Coding	P38117	58	GC19M051345	33.1438	https://www.genecards.org/cgi-bin/carddisp.pl?gene=ETFB
CTSA	Cathepsin A	Protein Coding	P10619	60	GC20P045890	33.1404	https://www.genecards.org/cgi-bin/carddisp.pl?gene=CTSA
GATA1	GATA Binding Protein 1	Protein Coding	P15976	58	GC0XP048786	33.135	https://www.genecards.org/cgi-bin/carddisp.pl?gene=GATA1
PLCB1	Phospholipase C Beta 1	Protein Coding	Q9NQ66	61	GC20P008077	33.1309	https://www.genecards.org/cgi-bin/carddisp.pl?gene=PLCB1
PDHA1	Pyruvate Dehydrogenase E1 Subunit Alpha 1	Protein Coding	P08559	60	GC0XP019343	33.1276	https://www.genecards.org/cgi-bin/carddisp.pl?gene=PDHA1
RPGR	Retinitis Pigmentosa GTPase Regulator	Protein Coding	Q92834	53	GC0XM038269	33.1266	https://www.genecards.org/cgi-bin/carddisp.pl?gene=RPGR
BST2	Bone Marrow Stromal Cell Antigen 2	Protein Coding	Q10589	52	GC19M115906	33.1181	https://www.genecards.org/cgi-bin/carddisp.pl?gene=BST2
FANCD2	FA Complementation Group D2	Protein Coding	Q9BXW9	59	GC03P010026	33.0895	https://www.genecards.org/cgi-bin/carddisp.pl?gene=FANCD2
SOAT1	Sterol O-Acyltransferase 1	Protein Coding	P35610	56	GC01P184599	33.0858	https://www.genecards.org/cgi-bin/carddisp.pl?gene=SOAT1
STX1B	Syntaxin 1B	Protein Coding	P61266	53	GC16M030989	33.0798	https://www.genecards.org/cgi-bin/carddisp.pl?gene=STX1B
F7	Coagulation Factor VII	Protein Coding	P08709	61	GC13P113105	33.0703	https://www.genecards.org/cgi-bin/carddisp.pl?gene=F7
PINK1	PTEN Induced Kinase 1	Protein Coding	Q9BXM7	59	GC01P092520	33.0632	https://www.genecards.org/cgi-bin/carddisp.pl?gene=PINK1
NHERF1	NHERF Family PDZ Scaffold Protein 1	Protein Coding	O14745	56	GC17P176339	33.0467	https://www.genecards.org/cgi-bin/carddisp.pl?gene=NHERF1
RASA1	RAS P21 Protein Activator 1	Protein Coding	P20936	60	GC05P087267	33.0435	https://www.genecards.org/cgi-bin/carddisp.pl?gene=RASA1
CHI3L1	Chitinase 3 Like 1	Protein Coding	P36222	58	GC01M203179	33.0224	https://www.genecards.org/cgi-bin/carddisp.pl?gene=CHI3L1
ENO2	Enolase 2	Protein Coding	P09104	60	GC12P006913	33.0222	https://www.genecards.org/cgi-bin/carddisp.pl?gene=ENO2
CYP2B6	Cytochrome P450 Family 2 Subfamily B Member 6	Protein Coding	P20813	59	GC19P040991	33.0159	https://www.genecards.org/cgi-bin/carddisp.pl?gene=CYP2B6
FGF7	Fibroblast Growth Factor 7	Protein Coding	P21781	57	GC15P049423	32.9971	https://www.genecards.org/cgi-bin/carddisp.pl?gene=FGF7
AEBP1	AE Binding Protein 1	Protein Coding	Q8IUX7	53	GC07P045725	32.9762	https://www.genecards.org/cgi-bin/carddisp.pl?gene=AEBP1
ATP8A1	ATPase Phospholipid Transporting 8A1	Protein Coding	Q9Y2Q0	52	GC04M042410	32.9759	https://www.genecards.org/cgi-bin/carddisp.pl?gene=ATP8A1
VAV1	Vav Guanine Nucleotide Exchange Factor 1	Protein Coding	P15498	58	GC19P006772	32.9759	https://www.genecards.org/cgi-bin/carddisp.pl?gene=VAV1
SAG	S-Antigen Visual Arrestin	Protein Coding	P10523	57	GC02P235883	32.9698	https://www.genecards.org/cgi-bin/carddisp.pl?gene=SAG
AP2M1	Adaptor Related Protein Complex 2 Subunit Mu 1	Protein Coding	Q96CW1	59	GC03P184174	32.9677	https://www.genecards.org/cgi-bin/carddisp.pl?gene=AP2M1
EIF2S1	Eukaryotic Translation Initiation Factor 2 Subunit Alpha	Protein Coding	P05198	58	GC14P067374	32.9607	https://www.genecards.org/cgi-bin/carddisp.pl?gene=EIF2S1
RPS6KB1	Ribosomal Protein S6 Kinase B1	Protein Coding	P23443	63	GC17P059893	32.9511	https://www.genecards.org/cgi-bin/carddisp.pl?gene=RPS6KB1
ABCA3	ATP Binding Cassette Subfamily A Member 3	Protein Coding	Q99758	61	GC16M002275	32.9357	https://www.genecards.org/cgi-bin/carddisp.pl?gene=ABCA3
ABCD1	ATP Binding Cassette Subfamily D Member 1	Protein Coding	P33897	58	GC0XP153724	32.915	https://www.genecards.org/cgi-bin/carddisp.pl?gene=ABCD1
BAIAP2L1	BAR/IMD Domain Containing Adaptor Protein 2 Like 1	Protein Coding	Q9UHR4	49	GC07M098326	32.9146	https://www.genecards.org/cgi-bin/carddisp.pl?gene=BAIAP2L1
CHRNB2	Cholinergic Receptor Nicotinic Beta 2 Subunit	Protein Coding	P17787	58	GC01P183686	32.9055	https://www.genecards.org/cgi-bin/carddisp.pl?gene=CHRNB2
RAG1	Recombination Activating 1	Protein Coding	P15918	55	GC11P036554	32.9049	https://www.genecards.org/cgi-bin/carddisp.pl?gene=RAG1
BID	BH3 Interacting Domain Death Agonist	Protein Coding	P55957	58	GC22M017734	32.8886	https://www.genecards.org/cgi-bin/carddisp.pl?gene=BID
CITED2	Cbp/P300 Interacting Transactivator With Glu/Asp Rich Carboxy-Terminal Domain 2	Protein Coding	Q99967	55	GC06M139371	32.8655	https://www.genecards.org/cgi-bin/carddisp.pl?gene=CITED2
DNMT3B	DNA Methyltransferase 3 Beta	Protein Coding	Q9UBC3	63	GC20P032762	32.8582	https://www.genecards.org/cgi-bin/carddisp.pl?gene=DNMT3B
CXCR3	C-X-C Motif Chemokine Receptor 3	Protein Coding	P49682	58	GC0XM071615	32.8569	https://www.genecards.org/cgi-bin/carddisp.pl?gene=CXCR3
MRC2	Mannose Receptor C-Type 2	Protein Coding	Q9UBG0	52	GC17P062627	32.8491	https://www.genecards.org/cgi-bin/carddisp.pl?gene=MRC2
ZEB1	Zinc Finger E-Box Binding Homeobox 1	Protein Coding	P37275	61	GC10P031318	32.8427	https://www.genecards.org/cgi-bin/carddisp.pl?gene=ZEB1
SLC1A2	Solute Carrier Family 1 Member 2	Protein Coding	P43004	62	GC11M035281	32.8397	https://www.genecards.org/cgi-bin/carddisp.pl?gene=SLC1A2
FFAR1	Free Fatty Acid Receptor 1	Protein Coding	O14842	51	GC19P172740	32.836	https://www.genecards.org/cgi-bin/carddisp.pl?gene=FFAR1
FANCC	FA Complementation Group C	Protein Coding	Q00597	60	GC09M095099	32.8057	https://www.genecards.org/cgi-bin/carddisp.pl?gene=FANCC
MLXIPL	MLX Interacting Protein Like	Protein Coding	Q9NP71	54	GC07M073593	32.8016	https://www.genecards.org/cgi-bin/carddisp.pl?gene=MLXIPL
ATXN7	Ataxin 7	Protein Coding	O15265	54	GC03P069641	32.7954	https://www.genecards.org/cgi-bin/carddisp.pl?gene=ATXN7
SLC9A1	Solute Carrier Family 9 Member A1	Protein Coding	P19634	63	GC01M041363	32.792	https://www.genecards.org/cgi-bin/carddisp.pl?gene=SLC9A1
SUMF1	Sulfatase Modifying Factor 1	Protein Coding	Q8NBK3	54	GC03M003700	32.7904	https://www.genecards.org/cgi-bin/carddisp.pl?gene=SUMF1
NR0B2	Nuclear Receptor Subfamily 0 Group B Member 2	Protein Coding	Q15466	54	GC01M041356	32.7898	https://www.genecards.org/cgi-bin/carddisp.pl?gene=NR0B2
MIF	Macrophage Migration Inhibitory Factor	Protein Coding	P14174	60	GC22P023894	32.78	https://www.genecards.org/cgi-bin/carddisp.pl?gene=MIF
TRAF3	TNF Receptor Associated Factor 3	Protein Coding	Q13114	58	GC14P122674	32.7539	https://www.genecards.org/cgi-bin/carddisp.pl?gene=TRAF3
KRT7	Keratin 7	Protein Coding	P08729	55	GC12P052232	32.7529	https://www.genecards.org/cgi-bin/carddisp.pl?gene=KRT7
BECN1	Beclin 1	Protein Coding	Q14457	59	GC17M104775	32.7457	https://www.genecards.org/cgi-bin/carddisp.pl?gene=BECN1
GZMB	Granzyme B	Protein Coding	P10144	59	GC14M024630	32.7407	https://www.genecards.org/cgi-bin/carddisp.pl?gene=GZMB
LYST	Lysosomal Trafficking Regulator	Protein Coding	Q99698	49	GC01M235661	32.7392	https://www.genecards.org/cgi-bin/carddisp.pl?gene=LYST
SLC26A1	Solute Carrier Family 26 Member 1	Protein Coding	Q9H2B4	51	GC04M007110	32.7336	https://www.genecards.org/cgi-bin/carddisp.pl?gene=SLC26A1
NKX3-2	NK3 Homeobox 2	Protein Coding	P78367	47	GC04M013542	32.731	https://www.genecards.org/cgi-bin/carddisp.pl?gene=NKX3-2
SLC11A2	Solute Carrier Family 11 Member 2	Protein Coding	P49281	60	GC12M050952	32.7264	https://www.genecards.org/cgi-bin/carddisp.pl?gene=SLC11A2
STAT6	Signal Transducer And Activator Of Transcription 6	Protein Coding	P42226	64	GC12M057095	32.7261	https://www.genecards.org/cgi-bin/carddisp.pl?gene=STAT6
BACE1	Beta-Secretase 1	Protein Coding	P56817	59	GC11M117285	32.7174	https://www.genecards.org/cgi-bin/carddisp.pl?gene=BACE1
MIA3	MIA SH3 Domain ER Export Factor 3	Protein Coding	Q5JRA6	49	GC01P222618	32.7146	https://www.genecards.org/cgi-bin/carddisp.pl?gene=MIA3
NCAM1	Neural Cell Adhesion Molecule 1	Protein Coding	P13591	61	GC11P112961	32.713	https://www.genecards.org/cgi-bin/carddisp.pl?gene=NCAM1
NKX2-1	NK2 Homeobox 1	Protein Coding	P43699	60	GC14M036516	32.6975	https://www.genecards.org/cgi-bin/carddisp.pl?gene=NKX2-1
IL7	Interleukin 7	Protein Coding	P13232	55	GC08M078689	32.687	https://www.genecards.org/cgi-bin/carddisp.pl?gene=IL7
CLEC12A	C-Type Lectin Domain Family 12 Member A	Protein Coding	Q5QGZ9	50	GC12P009951	32.6797	https://www.genecards.org/cgi-bin/carddisp.pl?gene=CLEC12A
ACOX1	Acyl-CoA Oxidase 1	Protein Coding	Q15067	57	GC17M075941	32.6784	https://www.genecards.org/cgi-bin/carddisp.pl?gene=ACOX1
DYNC2LI1	Dynein Cytoplasmic 2 Light Intermediate Chain 1	Protein Coding	Q8TCX1	50	GC02P046032	32.6769	https://www.genecards.org/cgi-bin/carddisp.pl?gene=DYNC2LI1
KL	Klotho	Protein Coding	Q9UEF7	60	GC13P033016	32.6495	https://www.genecards.org/cgi-bin/carddisp.pl?gene=KL
LMNB1	Lamin B1	Protein Coding	P20700	58	GC05P126776	32.6222	https://www.genecards.org/cgi-bin/carddisp.pl?gene=LMNB1
MIR145	MicroRNA 145	RNA Gene		33	GC05P149430	32.6063	https://www.genecards.org/cgi-bin/carddisp.pl?gene=MIR145
SLC35A1	Solute Carrier Family 35 Member A1	Protein Coding	P78382	51	GC06P087470	32.6001	https://www.genecards.org/cgi-bin/carddisp.pl?gene=SLC35A1
BCL6	BCL6 Transcription Repressor	Protein Coding	P41182	58	GC03M187721	32.5948	https://www.genecards.org/cgi-bin/carddisp.pl?gene=BCL6
ALOX5	Arachidonate 5-Lipoxygenase	Protein Coding	P09917	61	GC10P045374	32.5843	https://www.genecards.org/cgi-bin/carddisp.pl?gene=ALOX5
RHEB	Ras Homolog, MTORC1 Binding	Protein Coding	Q15382	63	GC07M151466	32.5826	https://www.genecards.org/cgi-bin/carddisp.pl?gene=RHEB
PYY	Peptide YY	Protein Coding	P10082	55	GC17M043952	32.56	https://www.genecards.org/cgi-bin/carddisp.pl?gene=PYY
TNFSF12	TNF Superfamily Member 12	Protein Coding	O43508	51	GC17P174536	32.5457	https://www.genecards.org/cgi-bin/carddisp.pl?gene=TNFSF12
PIGN	Phosphatidylinositol Glycan Anchor Biosynthesis Class N	Protein Coding	O95427	52	GC18M061905	32.5446	https://www.genecards.org/cgi-bin/carddisp.pl?gene=PIGN
CHRNG	Cholinergic Receptor Nicotinic Gamma Subunit	Protein Coding	P07510	55	GC02P232539	32.5445	https://www.genecards.org/cgi-bin/carddisp.pl?gene=CHRNG
LPIN2	Lipin 2	Protein Coding	Q92539	52	GC18M004124	32.5351	https://www.genecards.org/cgi-bin/carddisp.pl?gene=LPIN2
MIR143	MicroRNA 143	RNA Gene		32	GC05P162679	32.5252	https://www.genecards.org/cgi-bin/carddisp.pl?gene=MIR143
MT-ND2	Mitochondrially Encoded NADH:Ubiquinone Oxidoreductase Core Subunit 2	Protein Coding	P03891	44	GCMTP004472	32.5157	https://www.genecards.org/cgi-bin/carddisp.pl?gene=MT-ND2
PIGW	Phosphatidylinositol Glycan Anchor Biosynthesis Class W	Protein Coding	Q7Z7B1	48	GC17P036534	32.5115	https://www.genecards.org/cgi-bin/carddisp.pl?gene=PIGW
ALDH7A1	Aldehyde Dehydrogenase 7 Family Member A1	Protein Coding	P49419	60	GC05M126541	32.5098	https://www.genecards.org/cgi-bin/carddisp.pl?gene=ALDH7A1
HPS5	HPS5 Biogenesis Of Lysosomal Organelles Complex 2 Subunit 2	Protein Coding	Q9UPZ3	51	GC11M018278	32.4902	https://www.genecards.org/cgi-bin/carddisp.pl?gene=HPS5
CNTN2	Contactin 2	Protein Coding	Q02246	58	GC01P205043	32.4889	https://www.genecards.org/cgi-bin/carddisp.pl?gene=CNTN2
FHL1	Four And A Half LIM Domains 1	Protein Coding	Q13642	58	GC0XP136146	32.4862	https://www.genecards.org/cgi-bin/carddisp.pl?gene=FHL1
MANF	Mesencephalic Astrocyte Derived Neurotrophic Factor	Protein Coding	P55145	54	GC03P051385	32.4675	https://www.genecards.org/cgi-bin/carddisp.pl?gene=MANF
TRPC3	Transient Receptor Potential Cation Channel Subfamily C Member 3	Protein Coding	Q13507	58	GC04M121879	32.465	https://www.genecards.org/cgi-bin/carddisp.pl?gene=TRPC3
ADAM10	ADAM Metallopeptidase Domain 10	Protein Coding	O14672	66	GC15M058588	32.4451	https://www.genecards.org/cgi-bin/carddisp.pl?gene=ADAM10
ALOX12	Arachidonate 12-Lipoxygenase, 12S Type	Protein Coding	P18054	57	GC17P174486	32.4447	https://www.genecards.org/cgi-bin/carddisp.pl?gene=ALOX12
PAK2	P21 (RAC1) Activated Kinase 2	Protein Coding	Q13177	59	GC03P196739	32.4431	https://www.genecards.org/cgi-bin/carddisp.pl?gene=PAK2
B9D2	B9 Domain Containing 2	Protein Coding	Q9BPU9	50	GC19M041354	32.4319	https://www.genecards.org/cgi-bin/carddisp.pl?gene=B9D2
VCAN	Versican	Protein Coding	P13611	58	GC05P083471	32.4245	https://www.genecards.org/cgi-bin/carddisp.pl?gene=VCAN
RASA2	RAS P21 Protein Activator 2	Protein Coding	Q15283	51	GC03P145350	32.4081	https://www.genecards.org/cgi-bin/carddisp.pl?gene=RASA2
UNC13D	Unc-13 Homolog D	Protein Coding	Q70J99	55	GC17M075827	32.3993	https://www.genecards.org/cgi-bin/carddisp.pl?gene=UNC13D
AMBP	Alpha-1-Microglobulin/Bikunin Precursor	Protein Coding	P02760	57	GC09M114060	32.3916	https://www.genecards.org/cgi-bin/carddisp.pl?gene=AMBP
BGN	Biglycan	Protein Coding	P21810	57	GC0XP153494	32.3741	https://www.genecards.org/cgi-bin/carddisp.pl?gene=BGN
NFATC2	Nuclear Factor Of Activated T Cells 2	Protein Coding	Q13469	58	GC20M051386	32.3691	https://www.genecards.org/cgi-bin/carddisp.pl?gene=NFATC2
SH2D1A	SH2 Domain Containing 1A	Protein Coding	O60880	59	GC0XP124227	32.3646	https://www.genecards.org/cgi-bin/carddisp.pl?gene=SH2D1A
TG	Thyroglobulin	Protein Coding	P01266	56	GC08P132866	32.3511	https://www.genecards.org/cgi-bin/carddisp.pl?gene=TG
TJP1	Tight Junction Protein 1	Protein Coding	Q07157	58	GC15M029699	32.3489	https://www.genecards.org/cgi-bin/carddisp.pl?gene=TJP1
PGR	Progesterone Receptor	Protein Coding	P06401	62	GC11M146772	32.3476	https://www.genecards.org/cgi-bin/carddisp.pl?gene=PGR
CAPN1	Calpain 1	Protein Coding	P07384	62	GC11P129868	32.3395	https://www.genecards.org/cgi-bin/carddisp.pl?gene=CAPN1
PDPK1	3-Phosphoinositide Dependent Protein Kinase 1	Protein Coding	O15530	62	GC16P002537	32.3336	https://www.genecards.org/cgi-bin/carddisp.pl?gene=PDPK1
DARS2	Aspartyl-TRNA Synthetase 2, Mitochondrial	Protein Coding	Q6PI48	55	GC01P173824	32.3317	https://www.genecards.org/cgi-bin/carddisp.pl?gene=DARS2
DNAJC19	DnaJ Heat Shock Protein Family (Hsp40) Member C19	Protein Coding	Q96DA6	52	GC03M180983	32.2969	https://www.genecards.org/cgi-bin/carddisp.pl?gene=DNAJC19
FOXRED1	FAD Dependent Oxidoreductase Domain Containing 1	Protein Coding	Q96CU9	52	GC11P126269	32.2949	https://www.genecards.org/cgi-bin/carddisp.pl?gene=FOXRED1
PRKD1	Protein Kinase D1	Protein Coding	Q15139	61	GC14M029576	32.2888	https://www.genecards.org/cgi-bin/carddisp.pl?gene=PRKD1
FLCN	Folliculin	Protein Coding	Q8NFG4	54	GC17M017212	32.2867	https://www.genecards.org/cgi-bin/carddisp.pl?gene=FLCN
GFI1	Growth Factor Independent 1 Transcriptional Repressor	Protein Coding	Q99684	52	GC01M092474	32.2788	https://www.genecards.org/cgi-bin/carddisp.pl?gene=GFI1
TGFA	Transforming Growth Factor Alpha	Protein Coding	P01135	59	GC02M070447	32.2726	https://www.genecards.org/cgi-bin/carddisp.pl?gene=TGFA
ERCC5	ERCC Excision Repair 5, Endonuclease	Protein Coding	P28715	57	GC13P102845	32.2578	https://www.genecards.org/cgi-bin/carddisp.pl?gene=ERCC5
LGALS3	Galectin 3	Protein Coding	P17931	57	GC14P066439	32.2548	https://www.genecards.org/cgi-bin/carddisp.pl?gene=LGALS3
ATP5F1A	ATP Synthase F1 Subunit Alpha	Protein Coding	P25705	58	GC18M046081	32.2495	https://www.genecards.org/cgi-bin/carddisp.pl?gene=ATP5F1A
ATP8B2	ATPase Phospholipid Transporting 8B2	Protein Coding	P98198	48	GC01P154325	32.2161	https://www.genecards.org/cgi-bin/carddisp.pl?gene=ATP8B2
OGG1	8-Oxoguanine DNA Glycosylase	Protein Coding	O15527	59	GC03P030161	32.2121	https://www.genecards.org/cgi-bin/carddisp.pl?gene=OGG1
AHR	Aryl Hydrocarbon Receptor	Protein Coding	P35869	60	GC07P016916	32.2009	https://www.genecards.org/cgi-bin/carddisp.pl?gene=AHR
NDE1	NudE Neurodevelopment Protein 1	Protein Coding	Q9NXR1	53	GC16P136250	32.2005	https://www.genecards.org/cgi-bin/carddisp.pl?gene=NDE1
TRMU	TRNA Mitochondrial 2-Thiouridylase	Protein Coding	O75648	51	GC22P046330	32.1974	https://www.genecards.org/cgi-bin/carddisp.pl?gene=TRMU
NUS1	NUS1 Dehydrodolichyl Diphosphate Synthase Subunit	Protein Coding	Q96E22	50	GC06P117675	32.1956	https://www.genecards.org/cgi-bin/carddisp.pl?gene=NUS1
XRCC4	X-Ray Repair Cross Complementing 4	Protein Coding	Q13426	56	GC05P083077	32.1823	https://www.genecards.org/cgi-bin/carddisp.pl?gene=XRCC4
KIF22	Kinesin Family Member 22	Protein Coding	Q14807	55	GC16P136755	32.178	https://www.genecards.org/cgi-bin/carddisp.pl?gene=KIF22
G6PC3	Glucose-6-Phosphatase Catalytic Subunit 3	Protein Coding	Q9BUM1	52	GC17P044070	32.1738	https://www.genecards.org/cgi-bin/carddisp.pl?gene=G6PC3
PIKFYVE	Phosphoinositide Kinase, FYVE-Type Zinc Finger Containing	Protein Coding	Q9Y2I7	63	GC02P208266	32.1593	https://www.genecards.org/cgi-bin/carddisp.pl?gene=PIKFYVE
MAP3K7	Mitogen-Activated Protein Kinase Kinase Kinase 7	Protein Coding	O43318	62	GC06M090513	32.1547	https://www.genecards.org/cgi-bin/carddisp.pl?gene=MAP3K7
MYH6	Myosin Heavy Chain 6	Protein Coding	P13533	58	GC14M023381	32.1307	https://www.genecards.org/cgi-bin/carddisp.pl?gene=MYH6
XYLT2	Xylosyltransferase 2	Protein Coding	Q9H1B5	57	GC17P175908	32.1192	https://www.genecards.org/cgi-bin/carddisp.pl?gene=XYLT2
DVL1	Dishevelled Segment Polarity Protein 1	Protein Coding	O14640	59	GC01M001335	32.1162	https://www.genecards.org/cgi-bin/carddisp.pl?gene=DVL1
PTGER2	Prostaglandin E Receptor 2	Protein Coding	P43116	61	GC14P052314	32.1136	https://www.genecards.org/cgi-bin/carddisp.pl?gene=PTGER2
IRAK1	Interleukin 1 Receptor Associated Kinase 1	Protein Coding	P51617	61	GC0XM154010	32.0972	https://www.genecards.org/cgi-bin/carddisp.pl?gene=IRAK1
CAD	Carbamoyl-Phosphate Synthetase 2, Aspartate Transcarbamylase, And Dihydroorotase	Protein Coding	P27708	61	GC02P027217	32.0839	https://www.genecards.org/cgi-bin/carddisp.pl?gene=CAD
FADS1	Fatty Acid Desaturase 1	Protein Coding	O60427	55	GC11M061799	32.0656	https://www.genecards.org/cgi-bin/carddisp.pl?gene=FADS1
EIF2B2	Eukaryotic Translation Initiation Factor 2B Subunit Beta	Protein Coding	P49770	56	GC14P075002	32.0584	https://www.genecards.org/cgi-bin/carddisp.pl?gene=EIF2B2
OTULIN	OTU Deubiquitinase With Linear Linkage Specificity	Protein Coding	Q96BN8	52	GC05P016069	32.0398	https://www.genecards.org/cgi-bin/carddisp.pl?gene=OTULIN
ABHD12	Abhydrolase Domain Containing 12, Lysophospholipase	Protein Coding	Q8N2K0	53	GC20M025294	32.033	https://www.genecards.org/cgi-bin/carddisp.pl?gene=ABHD12
GIP	Gastric Inhibitory Polypeptide	Protein Coding	P09681	50	GC17M048958	32.0298	https://www.genecards.org/cgi-bin/carddisp.pl?gene=GIP
NCOA2	Nuclear Receptor Coactivator 2	Protein Coding	Q15596	57	GC08M070109	32.0286	https://www.genecards.org/cgi-bin/carddisp.pl?gene=NCOA2
SGK1	Serum/Glucocorticoid Regulated Kinase 1	Protein Coding	O00141	62	GC06M134169	32.0208	https://www.genecards.org/cgi-bin/carddisp.pl?gene=SGK1
MIR223	MicroRNA 223	RNA Gene		30	GC0XP066018	31.9825	https://www.genecards.org/cgi-bin/carddisp.pl?gene=MIR223
MAOA	Monoamine Oxidase A	Protein Coding	P21397	61	GC0XP043654	31.9687	https://www.genecards.org/cgi-bin/carddisp.pl?gene=MAOA
PIK3R2	Phosphoinositide-3-Kinase Regulatory Subunit 2	Protein Coding	O00459	61	GC19P018153	31.9666	https://www.genecards.org/cgi-bin/carddisp.pl?gene=PIK3R2
TCN2	Transcobalamin 2	Protein Coding	P20062	55	GC22P102404	31.9491	https://www.genecards.org/cgi-bin/carddisp.pl?gene=TCN2
RTEL1	Regulator Of Telomere Elongation Helicase 1	Protein Coding	Q9NZ71	53	GC20P070517	31.9364	https://www.genecards.org/cgi-bin/carddisp.pl?gene=RTEL1
TRPM1	Transient Receptor Potential Cation Channel Subfamily M Member 1	Protein Coding	Q7Z4N2	55	GC15M031001	31.9344	https://www.genecards.org/cgi-bin/carddisp.pl?gene=TRPM1
MGAM	Maltase-Glucoamylase	Protein Coding	O43451	56	GC07P172350	31.9338	https://www.genecards.org/cgi-bin/carddisp.pl?gene=MGAM
YIPF5	Yip1 Domain Family Member 5	Protein Coding	Q969M3	48	GC05M144158	31.8946	https://www.genecards.org/cgi-bin/carddisp.pl?gene=YIPF5
ADM	Adrenomedullin	Protein Coding	P35318	57	GC11P025148	31.8898	https://www.genecards.org/cgi-bin/carddisp.pl?gene=ADM
ROCK2	Rho Associated Coiled-Coil Containing Protein Kinase 2	Protein Coding	O75116	58	GC02M011677	31.8864	https://www.genecards.org/cgi-bin/carddisp.pl?gene=ROCK2
ACACB	Acetyl-CoA Carboxylase Beta	Protein Coding	O00763	58	GC12P109116	31.8835	https://www.genecards.org/cgi-bin/carddisp.pl?gene=ACACB
TSPEAR	Thrombospondin Type Laminin G Domain And EAR Repeats	Protein Coding	Q8WU66	45	GC21M044497	31.8703	https://www.genecards.org/cgi-bin/carddisp.pl?gene=TSPEAR
FABP1	Fatty Acid Binding Protein 1	Protein Coding	P07148	55	GC02M088122	31.869	https://www.genecards.org/cgi-bin/carddisp.pl?gene=FABP1
SUZ12	SUZ12 Polycomb Repressive Complex 2 Subunit	Protein Coding	Q15022	54	GC17P175184	31.8618	https://www.genecards.org/cgi-bin/carddisp.pl?gene=SUZ12
MUSK	Muscle Associated Receptor Tyrosine Kinase	Protein Coding	O15146	60	GC09P110668	31.8615	https://www.genecards.org/cgi-bin/carddisp.pl?gene=MUSK
POU1F1	POU Class 1 Homeobox 1	Protein Coding	P28069	54	GC03M087259	31.8296	https://www.genecards.org/cgi-bin/carddisp.pl?gene=POU1F1
GPR143	G Protein-Coupled Receptor 143	Protein Coding	P51810	52	GC0XM018483	31.8272	https://www.genecards.org/cgi-bin/carddisp.pl?gene=GPR143
PDZD7	PDZ Domain Containing 7	Protein Coding	Q9H5P4	47	GC10M101007	31.825	https://www.genecards.org/cgi-bin/carddisp.pl?gene=PDZD7
MMP8	Matrix Metallopeptidase 8	Protein Coding	P22894	60	GC11M146790	31.8178	https://www.genecards.org/cgi-bin/carddisp.pl?gene=MMP8
CFI	Complement Factor I	Protein Coding	P05156	60	GC04M109732	31.8154	https://www.genecards.org/cgi-bin/carddisp.pl?gene=CFI
NPM1	Nucleophosmin 1	Protein Coding	P06748	63	GC05P171387	31.7902	https://www.genecards.org/cgi-bin/carddisp.pl?gene=NPM1
FANCA	FA Complementation Group A	Protein Coding	O15360	61	GC16M090354	31.7892	https://www.genecards.org/cgi-bin/carddisp.pl?gene=FANCA
ZFYVE26	Zinc Finger FYVE-Type Containing 26	Protein Coding	Q68DK2	51	GC14M067727	31.7801	https://www.genecards.org/cgi-bin/carddisp.pl?gene=ZFYVE26
TCIRG1	T Cell Immune Regulator 1, ATPase H+ Transporting V0 Subunit A3	Protein Coding	Q13488	57	GC11P130303	31.7616	https://www.genecards.org/cgi-bin/carddisp.pl?gene=TCIRG1
IFNGR2	Interferon Gamma Receptor 2	Protein Coding	P38484	56	GC21P033402	31.7529	https://www.genecards.org/cgi-bin/carddisp.pl?gene=IFNGR2
HARS2	Histidyl-TRNA Synthetase 2, Mitochondrial	Protein Coding	P49590	56	GC05P163097	31.7323	https://www.genecards.org/cgi-bin/carddisp.pl?gene=HARS2
TRPV6	Transient Receptor Potential Cation Channel Subfamily V Member 6	Protein Coding	Q9H1D0	60	GC07M142871	31.7212	https://www.genecards.org/cgi-bin/carddisp.pl?gene=TRPV6
PAH	Phenylalanine Hydroxylase	Protein Coding	P00439	59	GC12M102836	31.716	https://www.genecards.org/cgi-bin/carddisp.pl?gene=PAH
PRSS2	Serine Protease 2	Protein Coding	P07478	54	GC07P170539	31.7142	https://www.genecards.org/cgi-bin/carddisp.pl?gene=PRSS2
GABBR1	Gamma-Aminobutyric Acid Type B Receptor Subunit 1	Protein Coding	Q9UBS5	61	GC06M029555	31.709	https://www.genecards.org/cgi-bin/carddisp.pl?gene=GABBR1
AKR1D1	Aldo-Keto Reductase Family 1 Member D1	Protein Coding	P51857	55	GC07P170327	31.6676	https://www.genecards.org/cgi-bin/carddisp.pl?gene=AKR1D1
BBS12	Bardet-Biedl Syndrome 12	Protein Coding	Q6ZW61	45	GC04P123343	31.6473	https://www.genecards.org/cgi-bin/carddisp.pl?gene=BBS12
PRDM12	PR/SET Domain 12	Protein Coding	Q9H4Q4	47	GC09P130664	31.6409	https://www.genecards.org/cgi-bin/carddisp.pl?gene=PRDM12
NR4A2	Nuclear Receptor Subfamily 4 Group A Member 2	Protein Coding	P43354	59	GC02M156324	31.6374	https://www.genecards.org/cgi-bin/carddisp.pl?gene=NR4A2
MT-ND5	Mitochondrially Encoded NADH:Ubiquinone Oxidoreductase Core Subunit 5	Protein Coding	P03915	45	GCMTP012339	31.631	https://www.genecards.org/cgi-bin/carddisp.pl?gene=MT-ND5
ATIC	5-Aminoimidazole-4-Carboxamide Ribonucleotide Formyltransferase/IMP Cyclohydrolase	Protein Coding	P31939	58	GC02P215311	31.6133	https://www.genecards.org/cgi-bin/carddisp.pl?gene=ATIC
CCNA2	Cyclin A2	Protein Coding	P20248	58	GC04M121816	31.6042	https://www.genecards.org/cgi-bin/carddisp.pl?gene=CCNA2
SPTAN1	Spectrin Alpha, Non-Erythrocytic 1	Protein Coding	Q13813	61	GC09P128552	31.5915	https://www.genecards.org/cgi-bin/carddisp.pl?gene=SPTAN1
ERN1	Endoplasmic Reticulum To Nucleus Signaling 1	Protein Coding	O75460	60	GC17M064039	31.5904	https://www.genecards.org/cgi-bin/carddisp.pl?gene=ERN1
PLSCR3	Phospholipid Scramblase 3	Protein Coding	Q9NRY6	47	GC17M007389	31.5871	https://www.genecards.org/cgi-bin/carddisp.pl?gene=PLSCR3
EPOR	Erythropoietin Receptor	Protein Coding	P19235	61	GC19M011377	31.5751	https://www.genecards.org/cgi-bin/carddisp.pl?gene=EPOR
GNAQ	G Protein Subunit Alpha Q	Protein Coding	P50148	61	GC09M077716	31.5749	https://www.genecards.org/cgi-bin/carddisp.pl?gene=GNAQ
DNAJC5	DnaJ Heat Shock Protein Family (Hsp40) Member C5	Protein Coding	Q9H3Z4	53	GC20P070527	31.5678	https://www.genecards.org/cgi-bin/carddisp.pl?gene=DNAJC5
NOS1AP	Nitric Oxide Synthase 1 Adaptor Protein	Protein Coding	O75052	51	GC01P162069	31.5592	https://www.genecards.org/cgi-bin/carddisp.pl?gene=NOS1AP
GM2A	Ganglioside GM2 Activator	Protein Coding	P17900	54	GC05P151212	31.5407	https://www.genecards.org/cgi-bin/carddisp.pl?gene=GM2A
ANXA2	Annexin A2	Protein Coding	P07355	60	GC15M060347	31.5304	https://www.genecards.org/cgi-bin/carddisp.pl?gene=ANXA2
MAN2B1	Mannosidase Alpha Class 2B Member 1	Protein Coding	O00754	56	GC19M115746	31.5292	https://www.genecards.org/cgi-bin/carddisp.pl?gene=MAN2B1
ALPP	Alkaline Phosphatase, Placental	Protein Coding	P05187	57	GC02P232378	31.495	https://www.genecards.org/cgi-bin/carddisp.pl?gene=ALPP
DSC2	Desmocollin 2	Protein Coding	Q02487	57	GC18M031058	31.4844	https://www.genecards.org/cgi-bin/carddisp.pl?gene=DSC2
GRK1	G Protein-Coupled Receptor Kinase 1	Protein Coding	Q15835	55	GC13P115161	31.4813	https://www.genecards.org/cgi-bin/carddisp.pl?gene=GRK1
GDNF	Glial Cell Derived Neurotrophic Factor	Protein Coding	P39905	62	GC05M037812	31.4763	https://www.genecards.org/cgi-bin/carddisp.pl?gene=GDNF
DEFB4A	Defensin Beta 4A	Protein Coding	O15263	48	GC08P014391	31.475	https://www.genecards.org/cgi-bin/carddisp.pl?gene=DEFB4A
FYN	FYN Proto-Oncogene, Src Family Tyrosine Kinase	Protein Coding	P06241	60	GC06M111660	31.4567	https://www.genecards.org/cgi-bin/carddisp.pl?gene=FYN
BIRC2	Baculoviral IAP Repeat Containing 2	Protein Coding	Q13490	61	GC11P102347	31.455	https://www.genecards.org/cgi-bin/carddisp.pl?gene=BIRC2
COASY	Coenzyme A Synthase	Protein Coding	Q13057	57	GC17P042561	31.4286	https://www.genecards.org/cgi-bin/carddisp.pl?gene=COASY
POU5F1	POU Class 5 Homeobox 1	Protein Coding	Q01860	59	GC06M114913	31.4269	https://www.genecards.org/cgi-bin/carddisp.pl?gene=POU5F1
CFL2	Cofilin 2	Protein Coding	Q9Y281	56	GC14M034706	31.4208	https://www.genecards.org/cgi-bin/carddisp.pl?gene=CFL2
QDPR	Quinoid Dihydropteridine Reductase	Protein Coding	P09417	58	GC04M017460	31.4154	https://www.genecards.org/cgi-bin/carddisp.pl?gene=QDPR
MIR140	MicroRNA 140	RNA Gene		32	GC16P137781	31.4044	https://www.genecards.org/cgi-bin/carddisp.pl?gene=MIR140
TMEM38B	Transmembrane Protein 38B	Protein Coding	Q9NVV0	51	GC09P105694	31.4035	https://www.genecards.org/cgi-bin/carddisp.pl?gene=TMEM38B
UQCRC2	Ubiquinol-Cytochrome C Reductase Core Protein 2	Protein Coding	P22695	58	GC16P136457	31.3908	https://www.genecards.org/cgi-bin/carddisp.pl?gene=UQCRC2
CAPN2	Calpain 2	Protein Coding	P17655	60	GC01P223701	31.3889	https://www.genecards.org/cgi-bin/carddisp.pl?gene=CAPN2
GANAB	Glucosidase II Alpha Subunit	Protein Coding	Q14697	59	GC11M146061	31.3607	https://www.genecards.org/cgi-bin/carddisp.pl?gene=GANAB
MECOM	MDS1 And EVI1 Complex Locus	Protein Coding	Q03112	60	GC03M169083	31.3468	https://www.genecards.org/cgi-bin/carddisp.pl?gene=MECOM
CYLD	CYLD Lysine 63 Deubiquitinase	Protein Coding	Q9NQC7	60	GC16P050742	31.3408	https://www.genecards.org/cgi-bin/carddisp.pl?gene=CYLD
GRIN1	Glutamate Ionotropic Receptor NMDA Type Subunit 1	Protein Coding	Q05586	63	GC09P137138	31.3342	https://www.genecards.org/cgi-bin/carddisp.pl?gene=GRIN1
GRK2	G Protein-Coupled Receptor Kinase 2	Protein Coding	P25098	61	GC11P067266	31.3093	https://www.genecards.org/cgi-bin/carddisp.pl?gene=GRK2
BBS7	Bardet-Biedl Syndrome 7	Protein Coding	Q8IWZ6	50	GC04M121824	31.3065	https://www.genecards.org/cgi-bin/carddisp.pl?gene=BBS7
HMGA2	High Mobility Group AT-Hook 2	Protein Coding	P52926	57	GC12P065824	31.3019	https://www.genecards.org/cgi-bin/carddisp.pl?gene=HMGA2
GRIA3	Glutamate Ionotropic Receptor AMPA Type Subunit 3	Protein Coding	P42263	63	GC0XP123184	31.301	https://www.genecards.org/cgi-bin/carddisp.pl?gene=GRIA3
MT-ND4	Mitochondrially Encoded NADH:Ubiquinone Oxidoreductase Core Subunit 4	Protein Coding	P03905	44	GCMTP010762	31.2977	https://www.genecards.org/cgi-bin/carddisp.pl?gene=MT-ND4
ACP5	Acid Phosphatase 5, Tartrate Resistant	Protein Coding	P13686	59	GC19M011574	31.287	https://www.genecards.org/cgi-bin/carddisp.pl?gene=ACP5
SHOC2	SHOC2 Leucine Rich Repeat Scaffold Protein	Protein Coding	Q9UQ13	52	GC10P135075	31.2824	https://www.genecards.org/cgi-bin/carddisp.pl?gene=SHOC2
SELL	Selectin L	Protein Coding	P14151	56	GC01M169690	31.2789	https://www.genecards.org/cgi-bin/carddisp.pl?gene=SELL
SUOX	Sulfite Oxidase	Protein Coding	P51687	57	GC12P087006	31.2698	https://www.genecards.org/cgi-bin/carddisp.pl?gene=SUOX
KIF23	Kinesin Family Member 23	Protein Coding	Q02241	56	GC15P069414	31.2597	https://www.genecards.org/cgi-bin/carddisp.pl?gene=KIF23
F10	Coagulation Factor X	Protein Coding	P00742	63	GC13P113122	31.2205	https://www.genecards.org/cgi-bin/carddisp.pl?gene=F10
HTT	Huntingtin	Protein Coding	P42858	57	GC04P003041	31.1701	https://www.genecards.org/cgi-bin/carddisp.pl?gene=HTT
DPP6	Dipeptidyl Peptidase Like 6	Protein Coding	P42658	57	GC07P153748	31.1345	https://www.genecards.org/cgi-bin/carddisp.pl?gene=DPP6
MTRFR	Mitochondrial Translation Release Factor In Rescue	Protein Coding	Q9H3J6	45	GC12P141832	31.1293	https://www.genecards.org/cgi-bin/carddisp.pl?gene=MTRFR
ADH1B	Alcohol Dehydrogenase 1B (Class I), Beta Polypeptide	Protein Coding	P00325	57	GC04M099304	31.1061	https://www.genecards.org/cgi-bin/carddisp.pl?gene=ADH1B
TRPM6	Transient Receptor Potential Cation Channel Subfamily M Member 6	Protein Coding	Q9BX84	55	GC09M074725	31.0947	https://www.genecards.org/cgi-bin/carddisp.pl?gene=TRPM6
PRKCQ	Protein Kinase C Theta	Protein Coding	Q04759	61	GC10M007364	31.0836	https://www.genecards.org/cgi-bin/carddisp.pl?gene=PRKCQ
SLC10A2	Solute Carrier Family 10 Member 2	Protein Coding	Q12908	54	GC13M103043	31.0792	https://www.genecards.org/cgi-bin/carddisp.pl?gene=SLC10A2
PTDSS1	Phosphatidylserine Synthase 1	Protein Coding	P48651	55	GC08P096261	31.0778	https://www.genecards.org/cgi-bin/carddisp.pl?gene=PTDSS1
GC	GC Vitamin D Binding Protein	Protein Coding	P02774	57	GC04M071741	31.0658	https://www.genecards.org/cgi-bin/carddisp.pl?gene=GC
HAVCR1	Hepatitis A Virus Cellular Receptor 1	Protein Coding	Q96D42	54	GC05M157028	31.059	https://www.genecards.org/cgi-bin/carddisp.pl?gene=HAVCR1
MYLK	Myosin Light Chain Kinase	Protein Coding	Q15746	65	GC03M123610	31.0478	https://www.genecards.org/cgi-bin/carddisp.pl?gene=MYLK
CLEC4M	C-Type Lectin Domain Family 4 Member M	Protein Coding	Q9H2X3	53	GC19P007763	31.0439	https://www.genecards.org/cgi-bin/carddisp.pl?gene=CLEC4M
[truncated: 11,259 more rows]

## Sheet: N6
Term	Overlap	P-value	Adjusted P-value	Old P-value	Old Adjusted P-value	Odds Ratio	Combined Score	Genes
Neuroactive ligand-receptor interaction	16/341	8.03068e-13	1.42219e-10	0	0	14.1835	395.016	GRIA2;THRA;NPY5R;C5AR1;ADRB1;OPRM1;ADRA1A;ADRA2A;GRIN1;GRIN2A;ADORA2A;HRH2;ADORA1;TSPO;DRD1;DRD5
Calcium signaling pathway	14/240	1.32297e-12	1.42219e-10	0	0	17.4248	476.588	PDGFRA;PDE1A;NTRK3;CACNA1B;ADRB1;ADRA1A;GRIN1;GRIN2A;STIM1;ADORA2A;HRH2;ORAI1;DRD1;DRD5
cAMP signaling pathway	13/216	6.03125e-12	4.3224e-10	0	0	17.7804	459.34	GRIA2;MAP2K2;BAD;ADRB1;NFKB1;SLC9A1;GRIN1;GRIN2A;ADORA2A;ADORA1;ORAI1;DRD1;DRD5
Chemical carcinogenesis	11/239	4.86154e-09	2.61308e-07	0	0	13.0118	249.07	HSP90AA1;HSP90AB1;MAP2K2;KLF5;BAD;STAT3;CACNA1B;ADRB1;CYP3A4;IKBKE;NFKB1
Lipid and atherosclerosis	10/215	2.30765e-08	9.92289e-07	0	0	12.9934	228.482	SELP;HSP90AA1;HSP90AB1;TBK1;BAD;STAT3;IKBKE;NFKB1;HSPD1;NFE2L2
Thyroid hormone signaling pathway	8/121	4.2195e-08	1.51199e-06	0	0	18.4471	313.25	MAP2K2;THRA;HDAC1;BAD;SLC2A1;CTNNB1;HIF1A;SLC9A1
Cocaine addiction	2049-06-01	5.54079e-08	1.70181e-06	0	0	35.551	594.005	GRIA2;GRIN2A;MAOA;DRD1;NFKB1;GRIN1
Prostate cancer	1997-07-01	1.69262e-07	4.54891e-06	0	0	20.0263	312.246	PDGFRA;HSP90AA1;HSP90AB1;MAP2K2;BAD;CTNNB1;NFKB1
Amphetamine addiction	1969-06-01	4.44269e-07	1.04124e-05	0	0	24.2405	354.562	GRIA2;GRIN2A;HDAC1;MAOA;DRD1;GRIN1
Central carbon metabolism in cancer	1970-06-01	4.84298e-07	1.04124e-05	0	0	23.8606	346.946	PDGFRA;MAP2K2;NTRK3;SLC2A1;HIF1A;GCK
Pathways of neurodegeneration	12/475	6.72932e-07	1.31528e-05	0	0	7.00252	99.5172	GRIA2;GRIN2A;TBK1;MAP2K2;CSNK2A1;BAD;PSMB1;CACNA1B;CTNNB1;HSD17B10;NFKB1;GRIN1
Pathways in cancer	12/531	2.15424e-06	3.85968e-05	0	0	6.22897	81.276	PDGFRA;HSP90AA1;HSP90AB1;MAP2K2;HDAC1;BAD;STAT3;SLC2A1;CTNNB1;HIF1A;NFKB1;NFE2L2
Hepatitis C	7/157	4.38452e-06	7.25132e-05	0	0	11.9794	147.795	TBK1;MAP2K2;BAD;STAT3;CTNNB1;IKBKE;NFKB1
HIF-1 signaling pathway	6/109	6.56605e-06	0.000100836	0	0	14.7969	176.58	MAP2K2;STAT3;SLC2A1;PGK1;HIF1A;NFKB1
Kaposi sarcoma-associated herpesvirus infection	7/193	1.69037e-05	0.000242287	0	0	9.64321	105.959	TBK1;MAP2K2;STAT3;CTNNB1;IKBKE;HIF1A;NFKB1
Dopaminergic synapse	6/132	1.96605e-05	0.000264188	0	0	12.0818	130.929	GRIA2;GRIN2A;MAOA;CACNA1B;DRD1;DRD5
Nicotine addiction	2040-04-01	2.35777e-05	0.000292145	0	0	27.6111	294.202	GRIA2;GRIN2A;CACNA1B;GRIN1
Alzheimer disease	9/369	2.44586e-05	0.000292145	0	0	6.51867	69.2186	GRIN2A;MAP2K2;CSNK2A1;BAD;PSMB1;CTNNB1;HSD17B10;NFKB1;GRIN1
Measles	6/139	2.63422e-05	0.000298083	0	0	11.4419	120.647	TBK1;CSNK2A1;BAD;STAT3;IKBKE;NFKB1
PD-L1 expression and PD-1 checkpoint pathway in cancer	1989-05-01	3.64651e-05	0.000391999	0	0	14.9427	152.702	MAP2K2;CSNK2A1;STAT3;HIF1A;NFKB1
Morphine addiction	1991-05-01	4.05875e-05	0.000415539	0	0	14.5938	147.573	PDE1A;ADORA1;CACNA1B;OPRM1;DRD1
IL-17 signaling pathway	1994-05-01	4.74377e-05	0.000463596	0	0	14.0997	140.378	HSP90AA1;HSP90AB1;TBK1;IKBKE;NFKB1
Coronavirus disease	7/232	5.4777e-05	0.000490711	0	0	7.95596	78.0658	SELP;TBK1;C6;C5AR1;STAT3;IKBKE;NFKB1
Ras signaling pathway	7/232	5.4777e-05	0.000490711	0	0	7.95596	78.0658	PDGFRA;GRIN2A;TBK1;MAP2K2;BAD;NFKB1;GRIN1
Hepatitis B	6/162	6.21109e-05	0.000534153	0	0	9.74359	94.3822	TBK1;MAP2K2;BAD;STAT3;IKBKE;NFKB1
cGMP-PKG signaling pathway	6/167	7.35141e-05	0.000607905	0	0	9.4386	89.837	MAP2K2;BAD;ADORA1;ADRB1;ADRA1A;ADRA2A
Th17 cell differentiation	5/107	8.80384e-05	0.000701046	0	0	12.2946	114.804	HSP90AA1;HSP90AB1;STAT3;HIF1A;NFKB1
Insulin resistance	5/108	9.20099e-05	0.000706505	0	0	12.1746	113.146	PYGB;PTPN1;STAT3;SLC2A1;NFKB1
Alcoholism	6/186	0.000132963	0.000985757	0	0	8.43419	75.2789	GRIN2A;ADORA2A;HDAC1;MAOA;DRD1;GRIN1
Sphingolipid signaling pathway	5/119	0.000145416	0.00104215	0	0	10.9938	97.1401	MAP2K2;SMPD1;ADORA1;CTSD;NFKB1
Prion disease	7/273	0.000151161	0.00104838	0	0	6.71565	59.0787	GRIN2A;C6;CSNK2A1;BAD;PSMB1;CACNA1B;GRIN1
Acute myeloid leukemia	1967-04-01	0.000181425	0.00118201	0	0	15.7563	135.736	MAP2K2;BAD;STAT3;NFKB1
Long-term potentiation	1967-04-01	0.000181425	0.00118201	0	0	15.7563	135.736	GRIA2;GRIN2A;MAP2K2;GRIN1
Renal cell carcinoma	1969-04-01	0.000203327	0.00124901	0	0	15.27	129.806	MAP2K2;BAD;SLC2A1;HIF1A
Renin secretion	1969-04-01	0.000203327	0.00124901	0	0	15.27	129.806	PDE1A;ADORA1;ORAI1;ADRB1
Prolactin signaling pathway	1970-04-01	0.000214964	0.00124911	0	0	15.0379	126.996	MAP2K2;STAT3;GCK;NFKB1
RIG-I-like receptor signaling pathway	1970-04-01	0.000214964	0.00124911	0	0	15.0379	126.996	TBK1;PIN1;IKBKE;NFKB1
Rap1 signaling pathway	6/210	0.000256655	0.00145213	0	0	7.43288	61.4534	PDGFRA;GRIN2A;MAP2K2;ADORA2A;CTNNB1;GRIN1
Autophagy	5/137	0.000280408	0.00147043	0	0	9.486	77.5885	TBK1;MAP2K2;BAD;CTSD;HIF1A
Estrogen signaling pathway	5/137	0.000280408	0.00147043	0	0	9.486	77.5885	HSP90AA1;HSP90AB1;MAP2K2;OPRM1;CTSD
Insulin signaling pathway	5/137	0.000280408	0.00147043	0	0	9.486	77.5885	PYGB;PTPN1;MAP2K2;BAD;GCK
Chronic myeloid leukemia	1976-04-01	0.000295098	0.00149919	0	0	13.7806	112.011	MAP2K2;HDAC1;BAD;NFKB1
Fluid shear stress and atherosclerosis	5/139	0.000299837	0.00149919	0	0	9.34347	75.7968	HSP90AA1;HSP90AB1;CTNNB1;NFKB1;NFE2L2
Human cytomegalovirus infection	6/225	0.000371162	0.00181363	0	0	6.91851	54.6484	PDGFRA;TBK1;MAP2K2;STAT3;CTNNB1;NFKB1
Human papillomavirus infection	7/331	0.000485742	0.00232077	0	0	5.49719	41.9427	TBK1;MAP2K2;HDAC1;BAD;CTNNB1;IKBKE;NFKB1
Gap junction	1988-04-01	0.00051627	0.002413	0	0	11.8048	89.3488	PDGFRA;MAP2K2;ADRB1;DRD1
Necroptosis	5/159	0.000555139	0.00251784	0	0	8.12181	60.8835	PYGB;HSP90AA1;HSP90AB1;SMPD1;STAT3
Bile secretion	1990-04-01	0.000562122	0.00251784	0	0	11.5291	86.2812	ABCC2;SLC2A1;CYP3A4;SLC9A1
Toll-like receptor signaling pathway	4/104	0.000967552	0.00424538	0	0	9.908	68.7689	TBK1;MAP2K2;IKBKE;NFKB1
NOD-like receptor signaling pathway	5/181	0.000995368	0.00428008	0	0	7.09868	49.0689	HSP90AA1;HSP90AB1;TBK1;IKBKE;NFKB1
Neutrophil extracellular trap formation	5/189	0.00120669	0.00508703	0	0	6.78729	45.6097	SELP;MAP2K2;HDAC1;C5AR1;NFKB1
Neurotrophin signaling pathway	4/119	0.00159328	0.00656599	0	0	8.60913	55.4597	MAP2K2;BAD;NTRK3;NFKB1
Epstein-Barr virus infection	5/202	0.00161859	0.00656599	0	0	6.33522	40.7114	TBK1;HDAC1;STAT3;IKBKE;NFKB1
Proteoglycans in cancer	5/205	0.00172673	0.00687493	0	0	6.23924	39.6911	MAP2K2;STAT3;CTNNB1;HIF1A;SLC9A1
Endometrial cancer	1958-03-01	0.00186693	0.007298	0	0	13.3744	84.0376	MAP2K2;BAD;CTNNB1
Cytosolic DNA-sensing pathway	1963-03-01	0.00236677	0.00908672	0	0	12.2568	74.1073	TBK1;IKBKE;NFKB1
Mitophagy	1968-03-01	0.00294229	0.0110981	0	0	11.3111	65.9276	TBK1;CSNK2A1;HIF1A
Apoptosis	4/142	0.00302868	0.0111298	0	0	7.16594	41.5598	MAP2K2;BAD;CTSD;NFKB1
Adipocytokine signaling pathway	1969-03-01	0.00306678	0.0111298	0	0	11.1392	64.4638	STAT3;SLC2A1;NFKB1
Spinocerebellar ataxia	4/143	0.003106	0.0111298	0	0	7.11403	41.0794	GRIA2;GRIN2A;PSMB1;GRIN1
Adherens junction	1971-03-01	0.00332539	0.0117207	0	0	10.8105	61.6863	PTPN1;CSNK2A1;CTNNB1
Melanoma	1972-03-01	0.00345956	0.0118064	0	0	10.6532	60.3678	PDGFRA;MAP2K2;BAD
Non-small cell lung cancer	1972-03-01	0.00345956	0.0118064	0	0	10.6532	60.3678	MAP2K2;BAD;STAT3
PI3K-Akt signaling pathway	6/354	0.00376176	0.0126372	0	0	4.32538	24.148	PDGFRA;HSP90AA1;HSP90AB1;MAP2K2;BAD;NFKB1
Parkinson disease	5/249	0.00399098	0.0129294	0	0	5.10272	28.186	ADORA2A;MAOA;PSMB1;DRD1;NFE2L2
Salmonella infection	5/249	0.00399098	0.0129294	0	0	5.10272	28.186	HSP90AA1;HSP90AB1;MAP2K2;CTNNB1;NFKB1
Pancreatic cancer	1976-03-01	0.00402918	0.0129294	0	0	10.0675	55.514	BAD;STAT3;NFKB1
Amyotrophic lateral sclerosis	6/364	0.0043066	0.0136165	0	0	4.20241	22.8931	GRIA2;GRIN2A;TBK1;BAD;PSMB1;GRIN1
Hepatocellular carcinoma	4/168	0.0055027	0.0169235	0	0	6.02195	31.3293	MAP2K2;BAD;CTNNB1;NFE2L2
Complement and coagulation cascades	1985-03-01	0.00550998	0.0169235	0	0	8.95845	46.5946	C6;C5AR1;F3
Colorectal cancer	1986-03-01	0.00569203	0.016997	0	0	8.85007	45.7432	MAP2K2;BAD;CTNNB1
Insulin secretion	1986-03-01	0.00569203	0.016997	0	0	8.85007	45.7432	SLC2A1;KCNN3;GCK
Influenza A	4/172	0.00597508	0.0175978	0	0	5.87738	30.0931	TBK1;MAP2K2;IKBKE;NFKB1
Tuberculosis	4/180	0.0069994	0.0202604	0	0	5.60795	27.8263	BAD;CTSD;NFKB1;HSPD1
Salivary secretion	1993-03-01	0.00706757	0.0202604	0	0	8.15885	40.4046	ADRB1;ADRA1A;SLC9A1
Circadian entrainment	1997-03-01	0.00793454	0.022238	0	0	7.81009	37.7737	GRIA2;GRIN2A;GRIN1
MAPK signaling pathway	5/294	0.00796431	0.022238	0	0	4.29832	20.7729	PDGFRA;MAP2K2;DUSP3;CACNA1B;NFKB1
Choline metabolism in cancer	1998-03-01	0.00816064	0.0224941	0	0	7.72749	37.1571	PDGFRA;MAP2K2;HIF1A
AGE-RAGE signaling pathway in diabetic complications	3/100	0.00862417	0.0231775	0	0	7.56739	35.9692	STAT3;F3;NFKB1
Progesterone-mediated oocyte maturation	3/100	0.00862417	0.0231775	0	0	7.56739	35.9692	HSP90AA1;HSP90AB1;PLK1
Chemokine signaling pathway	4/192	0.00874377	0.0232088	0	0	5.24681	24.8668	GRK1;BAD;STAT3;NFKB1
Huntington disease	5/306	0.00937006	0.0245678	0	0	4.12444	19.2621	GRIA2;HDAC1;PSMB1;CACNA1B;GRIN1
MicroRNAs in cancer	5/310	0.00987442	0.0255783	0	0	4.06952	18.7922	PDGFRA;MAP2K2;HDAC1;STAT3;NFKB1
Starch and sucrose metabolism	2036-02-01	0.0100102	0.0256212	0	0	14.2626	65.667	PYGB;GCK
Glucagon signaling pathway	3/107	0.0103668	0.0261297	0	0	7.05556	32.2379	PYGB;SLC2A1;GCK
Thyroid cancer	2037-02-01	0.0105535	0.0261297	0	0	13.8544	63.0552	MAP2K2;CTNNB1
Viral carcinogenesis	4/203	0.0105734	0.0261297	0	0	4.95402	22.5379	HDAC1;BAD;STAT3;NFKB1
Toxoplasmosis	3/112	0.0117277	0.028653	0	0	6.73021	29.9211	BAD;STAT3;NFKB1
Serotonergic synapse	3/113	0.0120117	0.0290169	0	0	6.66869	29.4881	MAOA;CACNA1B;ALOX12
Human immunodeficiency virus 1 infection	4/212	0.0122423	0.0290594	0	0	4.7375	20.8586	TBK1;MAP2K2;BAD;NFKB1
Glutamatergic synapse	3/114	0.0122995	0.0290594	0	0	6.60827	29.0645	GRIA2;GRIN2A;GRIN1
Tryptophan metabolism	2042-02-01	0.0134602	0.0314559	0	0	12.1195	52.2111	MAOA;IDO1
Human T-cell leukemia virus 1 infection	4/219	0.0136509	0.0315586	0	0	4.58163	19.6733	MAP2K2;SLC2A1;TSPO;NFKB1
Platelet activation	3/124	0.0153966	0.0352157	0	0	6.05908	25.2882	P2RY12;STIM1;ORAI1
Type II diabetes mellitus	2046-02-01	0.0160065	0.0362251	0	0	11.0155	45.5466	CACNA1B;GCK
FoxO signaling pathway	3/131	0.017803	0.0398714	0	0	5.72569	23.0653	MAP2K2;STAT3;PLK1
Vascular smooth muscle contraction	3/133	0.0185269	0.0410648	0	0	5.63704	22.4835	MAP2K2;ADORA2A;ADRA1A
Yersinia infection	3/137	0.0200233	0.0439287	0	0	5.46766	21.3832	TBK1;MAP2K2;NFKB1
Neomycin, kanamycin and gentamicin biosynthesis	2025-05-01	0.0208263	0.0452287	0	0	59.9759	232.199	GCK
Signaling pathways regulating pluripotency of stem cells	3/143	0.0223897	0.0477155	0	0	5.23175	19.8762	MAP2K2;STAT3;CTNNB1
Regulation of lipolysis in adipocytes	1955-02-01	0.0224152	0.0477155	0	0	9.14082	34.717	ADORA1;ADRB1
Filter of Adjusted P-value greater than or equall = 0.5
