# Supplementary material for: Computational Screening of Alternaria Metabolites as Potential DPP-4 Inhibitors: ADMET, Molecular Docking, Molecular Dynamics, and Network Pharmacology Analysis
Source: Research Square preprint supplement (doi:10.21203/rs.3.rs-8483182/v1), 2026-01-09
Supplement: Supplementary file 2 [file 80767a61eae2923ce72f1441.xlsx]

## Sheet: Details
	Computational Screening of Alternaria Metabolites as Potential DPP-4 Inhibitors: ADMET, Molecular Docking, Molecular Dynamics, and Network Pharmacology Analysis
	Piyush Kumar1, Sai Anand Kannakazhi Kantari1*, Malleswara Dharanikota1*
	1 Department of Biosciences, Sri Sathya Sai Institute of Higher Learning, Puttaparthi, Andhra Pradesh, 515134, India. Email: piyushkumar@sssihl.edu.in, kksaianand@sssihl.edu.in, vnsmalleswaradkota@sssihl.edu.in
	* Correspondence: vnsmalleswaradkota@sssihl.edu.in , kksaianand@sssihl.edu.in
	Table of Content
Page No:	Title
S1	List of Compounds collected from Alternaria fungi
S2	List of 49 compounds obtained after filtering using Molsoft
S3	List of 33 compounds after screening for Toxicity using ProTox 3.0
S4	Molecular Docking result analysis using LigPlot+
S5	LigPlot+ results with detailed analysis of the protein-ligand complex at 300 ns of simulation.

## Sheet: S1
	Compounds from endophytic fungi (Alternaria)
Molecule	Compound Name	Molecular formula	Mol wt	Canonical SMILES	MolSoft (Drug-likness)	Refernce
1	(-)-alternarlactam	C14 H13 N O4	259.08	COc1cc(O)c2c(c1)c1C(C)CC(=O)c1[nH]c2=O	-0.08	https://doi.org/10.1002/chem.201002205
2	(-)-Lentiginosine	C8 H15 N O2	157.11	OC1CN2C(C1O)CCCC2	-0.81	https://doi.org/10.1186/s12866-019-1408-8
3	(+)- and (-)-Altemangin	C29H22O9	514.49	OC1=C2C3=C(C(C)=C1)C4=CC(OC)=CC(O)=C4C5=C3[C@](C(C=C(OC)C=C6O)=C6C(O7)=O)(O2)[C@]7(C)CC5=O	-1.02	https://www.frontiersin.org/journals/microbiology/articles/10.3389/fmicb.2022.1085666/full
4	(+)-(S)-6-hydroxy-1,8-dimethoxy-3a-methyl-3,3a-dihydrocyclopenta[c]-isochromene-2,5-dione	C15H14O6	290.27	O=C(O[C@](C)2C3)C1=C(O)C=C(OC)C=C1C2=C(OC)C3=O	-0.99	https://www.frontiersin.org/journals/microbiology/articles/10.3389/fmicb.2022.1085666/full
5	(+)-talaroflavone	C14 H12 O6	276.06	COc1cc(O)c2c(c1)C1(OC2=O)C(=CC(=O)C1O)C	-0.19	https://doi.org/10.1080/14786419.2024.2342557
6	(±)- (4S*,5S*)-2,4,5-trihydroxy-3-methoxy-4-methoxycarbonyl-5-methyl-2-cyclopenten-1-one	C9H12O7	232.19	O=C1[C@@](C)(O)[C@@]([C@](OC)=O)(O)C(OC)=C1O	-1.16	https://www.frontiersin.org/journals/microbiology/articles/10.3389/fmicb.2022.1085666/full
7	(±)- Alternaone A	C16H14O8	334.28	CC1=CC(=O)[C@@]([C@@]12C3=C(C(=CC(=C3)OC)O)C(=O)O2)(C(=O)OC)O	-0.19	https://www.frontiersin.org/journals/microbiology/articles/10.3389/fmicb.2022.1085666/full
8	(±) Alternarlactones A	C29H18O12	558.4	C[C@@]12CC(=O)[C@@]3(C4=C(C=C(C5=C4C6=C(C=C(C7=C6C3=C1C8=C(C(=CC(=C8O7)OC)O)C(=O)O2)O)OC5=O)O)OC)O	-0.7	https://www.frontiersin.org/journals/microbiology/articles/10.3389/fmicb.2022.1085666/full
9	(±) Alternarlactones B	C29H20O12	560.5	C[C@]12[C@H]3C4=C(C(=CC5=C4C6=C(C(=CC(=C6)OC)O)C(=O)O5)O)O[C@@]3(C(=O)C=C1C7=C(C(=CC(=C7)OC)O)C(=O)O2)O	-1.05	https://www.frontiersin.org/journals/microbiology/articles/10.3389/fmicb.2022.1085666/full
10	(10R)-7-hydroxy3-(2-hydroxy-propyl)-5, 6-dimethyl-isochromen-1-one	C14H16O4	248.28	O[C@H](C)CC2=CC1=C(C)C(C)=C(O)C=C1C(O2)=O	0.1	https://www.frontiersin.org/journals/microbiology/articles/10.3389/fmicb.2022.1085666/full
11	(R)-7-hydroxymellein/ cis-4-Hydroxymellein	C10 H10 O4	194.06	CC1OC(=O)c2c(C1O)cccc2O	-0.01	https://doi.org/10.1080/14786419.2016.1166498
12	(S)-alternariphent A	C13H14O4	234.25	OC1=CC(OC)=CC(C2=C(C)C[C@H](O)C2=O)=C1	-0.52	https://www.mdpi.com/1467-3045/44/10/345
13	1,2-Benzenedicarboxylic acid / Phthalic acid	C8 H6 O4	166.03	OC(=O)c1ccccc1C(=O)O	-1.34	10.1042/bj0800234
14	1,2-Benzenedicarboxylic acid, bis (2- ethyhexyl) ester	C24H38O4	390.56	O=C(OCC(CC)CCCC)C1=CC=CC=C1C(OCC(CCCC)CC)=O	-0.08	https://www.sciencedirect.com/science/article/pii/S1319562X18300913
15	1,2-Benzenedicarboxylic acid, dibutyl ester (CAS) Butyl phthalate	C16H22O4	278.35	O=C(OCCCC)C1=CC=CC=C1C(OCCCC)=O	-0.38	https://www.sciencedirect.com/science/article/pii/S1319562X18300916
16	1,2-butadiene	C4H6	54.09	CC=C=C	-1.17	https://www.frontiersin.org/journals/genetics/articles/10.3389/fgene.2022.1077159/full
17	1,2-Cyclobutanedicarbonitrile	C6H6N2	106.13	C1CC(C1C#N)C#N	-1.48	https://www.frontiersin.org/journals/genetics/articles/10.3389/fgene.2022.1077159/full
18	1,3-Cyclobutanedicarbonitrile	C6H6N2	106.13	C1C(CC1C#N)C#N	-1.45	https://www.frontiersin.org/journals/genetics/articles/10.3389/fgene.2022.1077159/full
19	1,8-dihydroxynaphthalene	C10 H8 O2	160.05	Oc1cccc2c1c(O)ccc2	-1.68	https://pubs.acs.org/doi/epdf/10.1021/acsomega.2c00641?ref=article_openPDF&articleRef=control
20	10-hydroxycamptothecine	C20 H16 N2 O5	364.11	CCC1(O)C(=O)OCc2c1cc1c3nc4ccc(cc4cc3Cn1c2=O)O	0.15	https://italianmycology.unibo.it/article/view/8468
21	12-Methoxycitromycin	C14 H12 O5	260.07	COc1cc2c(cc1O)OCc1c2oc(C)cc1=O	-0.8	https://www.mdpi.com/2076-0817/10/11/1448
22	15-hydroxytricycloalternarenes	C23H32O5	388.5	CC(CC/C=C(C)/COC(C)=O)C1=C[C@@]([H])([H])[C@](O3)(C)[C@]([H])1CC2=C3C(O)CCC2=O	0.79	https://www.frontiersin.org/journals/microbiology/articles/10.3389/fmicb.2022.1085666/full
23	17-O-methyltricycloalternarene D	C24H36O5	404.55	C[C@H](CCC[C@H](C)COC(C)=O)C1=CC[C@](O3)(C)[C@]([H])1CC2=C3CC[C@@H](OC)C2=O	0.64	https://www.frontiersin.org/journals/microbiology/articles/10.3389/fmicb.2022.1085666/full
24	17-Pentatriacontene	C35H70	490.9	CCCCCCCCCCCCCCCCC/C=C/CCCCCCCCCCCCCCCC	-1.12	https://www.sciencedirect.com/science/article/pii/S1319562X18300937
25	1-Butanol, 3-methyl-acetate	C7H14O2	130.19	CC(C)CCOC(C)=O	-1.02	https://www.sciencedirect.com/science/article/pii/S1319562X18300921
26	1-butyne	C4H6	54.09	CCC#C	-1.28	https://www.frontiersin.org/journals/genetics/articles/10.3389/fgene.2022.1077159/full
27	1-deoxyrubralactone	C14 H12 O5	260.07	COc1cc(O)c2c(c1)c1C(C)CC(=O)c1oc2=O	-0.57	https://www.beilstein-journals.org/bjoc/articles/20/187
28	1H-3a,7-Methanoazulen-5-ol, octahydro-3,8,8-trimethyl-6-methylene-	C15 H24 O	220.18	OC1CC23CC(C1=C)C(C3CCC2C)(C)C	-1.66	https://journals.plos.org/plosone/article?id=10.1371/journal.pone.0214744
29	1-Heptatriacotanol	C37H76O	537	CCCCCCCCCCCCCCCCCCCCCCCCCCCCCCCCCCCCC	-1.03	https://www.sciencedirect.com/science/article/pii/S1319562X18300931
30	1-Hexadecanol, 2-methyl-	C17H36O	256.47	CC(CCCCCCCCCCCCCC)CO	-1.38	https://www.sciencedirect.com/science/article/pii/S1319562X18300927
31	1-Octadecene	C18H36	252.5	CCCCCCCCCCCCCCCCC=C	-1.25	https://www.sciencedirect.com/science/article/pii/S1319562X18300917
32	1-Tetradecene	C14H28	196.37	CCCCCCCCCCCCC=C	-1.25	https://www.sciencedirect.com/science/article/pii/S1319562X18300922
33	1β,2β-Epoxybrassicicene	C21H34O4	350.5	O[C@H]2CC1=C(C(C)C)CC[C@@](C)1[C@@H]4[C@@]3(O4)[C@](CC[C@@](O)3COC)([H])[C@H]2C	0.27	https://www.frontiersin.org/journals/microbiology/articles/10.3389/fmicb.2022.1085666/full
34	2-(2'S-hydroxypropyl)-5-methyl-7-hydroxychromone/Aloesol	C13 H14 O4	234.09	CC(Cc1cc(=O)c2c(o1)cc(cc2C)O)O	0.26	https://pdf.hanspub.org/BP20120300000_13580111.pdf
35	2,2',2'’-nitrilotriethanol, triethyl ether	C12H27NO3	233.35	CCOCCN(CCOCC)CCOCC	-1.15	https://www.sciencedirect.com/science/article/pii/S1018364723003464
36	2,2,6-Trimethyl-1-(2-methyl-cyclobut-2-enyl)-hepta-4,6-dien-3-one	C15 H22 O	218.17	CC(=C)C=CC(=O)C(CC1CC=C1C)(C)C	-1.14	https://europepmc.org/backend/ptpmcrender.fcgi?accid=PMC6448914&blobtype=pdf
37	2,2,6-Trimethyl-bicyclo[4.1.0]hept-1-yl)-methanol	C11H20O	168.28	CC1(CCCC2(C1(C2)CO)C)C	-1.61	https://www.scielo.br/j/aws/a/zJMJZKrbvgRGsSJcdy7brtd/
38	2,4,5-trihydroxy-3-methoxy-4-methoxycarbonyl-5-methyl-2-cyclopenten-1-one	C9 H12 O7	232.06	COC(=O)C1(O)C(=C(C(=O)C1(C)O)O)OC	-1.16	https://www.mdpi.com/1660-3397/13/7/4492Alternaria
39	2,4,7,14-Tetramethyl-4-vinyl-tricyclo[5.4.3.0(1,8)]tetradecan-6-ol	C20 H34 O	290.26	C=CC1(C)CC(C)C23CCCC3C(C(C1)O)(C)C(CC2)C	-1.33	https://europepmc.org/backend/ptpmcrender.fcgi?accid=PMC6448914&blobtype=pdf
40	2,5-Cyclohexadien-1-one, 2,6-bis (1,1-dimethylethyl)-4-ethylidene-	C16H24O	232.36	CC=C1C=C(C(=O)C(=C1)C(C)(C)C)C(C)(C)C	-1.15	https://www.sciencedirect.com/science/article/pii/S1319562X18300915
41	2,5-Dihydrothiophene sulfone	C4H6O2S	118.16	C1C=CCS1(=O)=O	-1.04	https://www.frontiersin.org/journals/genetics/articles/10.3389/fgene.2022.1077159/full
42	2,5-dimethyl-7-hydroxychromone	C11 H10 O3	190.06	Oc1cc(C)c2c(c1)oc(cc2=O)C	-0.67	https://link.springer.com/article/10.1007/s12275-013-3189-3
43	2,6-Dihydroxyacetonphenone, bis(trimethylsilyl) ether	C14H24O3Si2	296.51	O=C(C)C1=C(O[Si](C)(C)C)C=CC=C1O[Si](C)(C)C	-1.45	https://www.frontiersin.org/journals/genetics/articles/10.3389/fgene.2022.1077159/full
44	2,8-dimethoxy-1,6-dimethoxycarbonyl-xanthen-9-one	C19 H16 O8	372.08	COC(=O)c1cc(OC)c2c(c1)oc1c(c2=O)c(C(=O)OC)c(cc1)OC	-0.28	https://www.mdpi.com/1660-3397/13/7/4492Alternaria
45	2-Acetoxy-2-epi-altenuene	C17H18O7	334.3	CC(=O)O[C@@H]1C=C2C3=C(C(=CC(=C3)OC)O)C(=O)O[C@]2(C[C@@H]1O)C	0.04	https://www.mdpi.com/2077-0472/10/11/545
46	2-butyne	C4H6	54.09	CC#CC	-1.28	https://www.frontiersin.org/journals/genetics/articles/10.3389/fgene.2022.1077159/full
47	2-epialtenuene or 5'-Epialtenuen	C15 H16 O6	292.09	COc1cc(O)c2c(c1)C1=CC(O)C(CC1(OC2=O)C)O	-0.5	https://www.mdpi.com/1420-3049/24/24/4450
48	2-hydroxy-indolizidine	C8 H15 N O	141.12	OC1CC2N(C1)CCCC2	-1.18	https://link.springer.com/article/10.1186/s12866-019-1408-8
49	2-Nitrohept-2-en-1-ol	C7H13NO3	159.18	CCCC/C=C(/CO)\[N+](=O)[O-]	-0.92	https://www.scielo.br/j/aws/a/zJMJZKrbvgRGsSJcdy7brtd/
50	3,11α,12β,13β,16-pentahydroxy-11,12-dihydroperylen-6(13H)-one	C20H14O6	350.33	OC1=C5C(C(C=CC5=O)=C4C3=C2C=CC(O)=C3[C@H](O)[C@H](O)[C@H]4O)=C2C=C1	0.02	https://www.frontiersin.org/journals/microbiology/articles/10.3389/fmicb.2022.1085666/full
51	3,6,6a,9,10-pentahydroxy-7,8-epoxy-4-oxo-4,5,6,6a,6b,7,8,9-octahydroperylene	C20H16O7	368.34	O=C2C[C@@H](O)[C@]3(O)C1=C(C5=C4[C@@]([H])3[C@@H](O6)[C@@H]6[C@H](O)C4=C(O)C=C5)C=CC(O)=C12	-0.24	https://www.frontiersin.org/journals/microbiology/articles/10.3389/fmicb.2022.1085666/full
52	3-acetyl-5-isobutyltetramic acid	C10H15NO3	197.23	CC(C)CC1C(=C(C(=O)N1)C(=O)C)O	-0.55	https://www.mdpi.com/2309-608X/8/2/181
53	3-acetyl-5-isopropyltetramic acid	C9H13NO3	183.2	CC(C)C1C(=C(C(=O)N1)C(=O)C)O	-0.87	https://www.mdpi.com/2309-608X/8/2/180
54	3-amino-4,5,6-trihydroxy-2-methoxy-5-methyl-2-cyclohexen-1-one	C8 H13 N O5	203.08	COC1=C(N)C(O)C(C(C1=O)O)(C)O	-0.68	https://www.mdpi.com/1660-3397/13/7/4492Alternaria
55	3-epi-dihydroaltenuene	C16H20O6	308.33	OC1=CC(OC)=CC([C@]2(C)[C@](O3)(C)C[C@@H](O)[C@H](O)C2)=C1C3=O	-0.32	https://www.frontiersin.org/journals/microbiology/articles/10.3389/fmicb.2022.1085666/full
56	3-epi-Dihydroaltenuene A	C15H18O6	294.3	C[C@]12C[C@H]([C@@H](C[C@@H]1C3=C(C(=CC(=C3)OC)O)C(=O)O2)O)O	-0.27	https://www.mdpi.com/2077-0472/10/11/546
57	3-epiradicinol	C12H14O5	238.24	C/C=C/C1=CC2=C(C(O1)=O)[C@@H](O)[C@@H](O)[C@H](C)O2	-0.27	https://www.mdpi.com/2309-608X/8/2/170
58	3-Ketobrassicicine W	C19H28O3	304.43	O[C@H]2CC1=C(C(C)C)C[C@H](O)[C@@](C)1\C=C3/[C@](CCC3=O)([H])[C@H]2C	0.05	https://www.frontiersin.org/journals/microbiology/articles/10.3389/fmicb.2022.1085666/full
59	3-Trifluoroacetoxytetradecane	C16H29F3O2	310.39	CCCCCCCCCCCC(CC)OC(=O)C(F)(F)F	-1.34	https://www.scielo.br/j/aws/a/zJMJZKrbvgRGsSJcdy7brtd/
60	3β,5α-Dihydroxy-(22E,24R)-ergosta-7,22-dien-6-one	C28H44O3	428.6	C[C@H](/C=C/[C@H](C)C(C)C)[C@H]1CC[C@@H]2[C@@]1(CC[C@H]3C2=CC(=O)[C@@]4([C@@]3(CC[C@@H](C4)O)C)O)C	0.69	https://link.springer.com/article/10.1007/s11274-009-0062-y
61	3β-Hydroxy-(22E,24R)-ergosta-5,8,22-trien-7-one	C28H42O2	410.64	O[C@H](C1)CC[C@@]2(C)C1=CC(C3=C2CC[C@@]4(C)C3CCC4[C@@H](/C=C/[C@H](C)C(C)C)C)=O	0.68	https://link.springer.com/article/10.1007/s11274-009-0062-y
62	4-chloro-1,5-dihydroxy-3-hydroxymethyl-6-methoxycarbonyl-xanthen-9-one	C16 H11 Cl O7	350.02	COC(=O)c1ccc2c(c1O)oc1c(c2=O)c(O)cc(c1Cl)CO	0.33	https://www.mdpi.com/1660-3397/13/7/4492Alternaria
63	4-chloropinselin	C16H11ClO6	334.71	O=C(C1=C(O2)C=C(C)C=C1O)C3=C2C(Cl)=C([H])C(O)=C3C(OC)=O	-0.45	https://www.mdpi.com/2218-273X/10/1/82
64	4-Deoxybostrycin	C16H16O7	320.3	CC(C1)(O)C(O)CC2=C1C(C3=C(O)C(OC)=CC(O)=C3C2=O)=O	0.2	https://www.mdpi.com/2309-608X/8/2/177
65	4'-Epialtenuene	C15 H16 O6	292.09	COc1cc(O)c2c(c1)C1=CC(O)C(CC1(OC2=O)C)O	-0.5	https://www.mdpi.com/1467-3045/44/10/344
66	4H-pyran-4-one,2,3-dihydro-3,5-dihydroxy-6-methyl	C6 H8 O4	144.04	OC1COC(=C(C1=O)O)C	-0.96	https://www.ajol.info/index.php/ajb/article/view/126103
67	4-Hydroxyalternariol 9-methyl ether	C15 H12 O6	288.06	COc1cc(O)c2c(c1)c1c(C)cc(c(c1oc2=O)O)O	-1.12	https://www.sciencedirect.com/science/article/abs/pii/S0367326X12001517
68	4-methoxy-6-methyl-5-(3-oxobutyl)-2H-pyran-2-one	C17H21NO3	210.23	CC1=C(C(=CC(=O)O1)OC)CCC(=O)C	-0.74	https://www.mdpi.com/1467-3045/44/10/348
69	5-(1-hydroxybutyl)-4-methoxy-6-methyl-2H-pyran-2-one	C11 H16 O4	212.1	CCCC(c1c(OC)cc(=O)oc1C)O	-0.5	https://www.sciencedirect.com/science/article/abs/pii/S0040403914007102
70	5-(2-Hydroxyethyl)-4-methoxy-6-methyl-2H-pyran-2-one	C9 H12 O4	184.07	OCCc1c(OC)cc(=O)oc1C	-0.88	https://www.sciencedirect.com/science/article/abs/pii/S0040403914007102
71	5,6-Dihydroergosterol	C28 H46 O	398.35	OC1CCC2(C(C1)CC=C1C2CCC2(C1CCC2C(C=CC(C(C)C)C)C)C)C	-0.35	https://link.springer.com/article/10.1186/s12866-019-1408-8
72	5-butyl-4-methoxy-6-methyl-2H-pyran-2-one	C11 H16 O3	196.11	CCCCc1c(OC)cc(=O)oc1C	-0.8	https://www.mdpi.com/1467-3045/44/10/344
73	5-butyl-6-(hydroxymethyl)-4-methoxy-2h-pyran-2-one	C11 H16 O4	212.1	CCCCc1c(OC)cc(=O)oc1CO	-0.65	https://www.sciencedirect.com/science/article/abs/pii/S0040403914007102
74	5-chloromoniliphenone	C16H13ClO6	336.72	OC1=CC(C)=CC(O)=C1C(C2=C(O)C(Cl)=CC=C2C(OC)=O)=O	-0.16	https://www.frontiersin.org/journals/microbiology/articles/10.3389/fmicb.2022.1085666/full
75	6,8-Dimethoxy-4-methyl-4H-chromene	C12H14O3	206.24	CC1C=COC2=C1C=C(C=C2OC)OC	-1.49	https://www.sciencedirect.com/science/article/pii/S1319562X18300914
76	6-Epi-stemphytriol	C20 H16 O7	368.09	O=C1CC(O)C2c3c1c(O)ccc3c1c3C2(O)C(O)CC(=O)c3c(cc1)O	-0.32	https://journals.sagepub.com/doi/epdf/10.1177/1934578X0900401107
77	7,9-Di-tert-butyl-1-oxaspiro (4,5) deca-6,9-Diene-2,8-dione (Ketone)	C17H24O3	276.4	CC(C)(C)C1=CC2(CCC(=O)O2)C=C(C1=O)C(C)(C)C	-1.18	https://www.sciencedirect.com/science/article/pii/S1319562X18300929
78	7-Dehydrobrefeldin A	C16H22O4	278.34	C[C@H]1CCC/C=C/[C@@H]2CC(=O)C[C@H]2[C@@H](/C=C/C(=O)O1)O	-0.65	https://www.mdpi.com/2309-608X/8/2/183
79	7-epi-8-hydroxyaltertoxin I	C16 H22 O4	278.15	OC1C(O)C(=O)c2c3C1C1(O)CCC(=O)c4c1c(c3ccc2O)ccc4O	0.71	https://journals.sagepub.com/doi/epdf/10.1177/1934578X0900401107
80	7-Methyl-Z-tetradecen-1-ol acetate	C17H32O2	268.4	CCCCC/C=C\C(C)CCCCCCOC(=O)C	-1	https://www.sciencedirect.com/science/article/pii/S1319562X18300926
81	9,10-Epoxy-8-hydroxy-9-methyl-decatrienoic acid	C11 H14 O4	210.09	OC(=O)C=CC=CC=CC(C1(C)OC1)O	-1.1	https://nph.onlinelibrary.wiley.com/doi/epdf/10.1111/nph.12754
82	9-Octadecenoic acid (Z), methyl ester	C19 H36 O2	296.27	CCCCCCCCC=CCCCCCCCC(=O)OC	-1.04	https://www.sciencedirect.com/science/article/pii/S1018364721001233
83	9-octadecenoic acid (z)-, methyl ester	C19H36O2	296.5	CCCCCCCCC=CCCCCCCCC(=O)OC	0.29	https://www.sciencedirect.com/science/article/pii/S1018364723003464
84	Adenine	C5H5N5	135.13	C1=NC2=NC=NC(=C2N1)N	-0.67	https://www.frontiersin.org/journals/microbiology/articles/10.3389/fmicb.2022.1085666/full
85	Adenosine	C10 H13 N5 O4	267.1	OCC1OC(C(C1O)O)n1cnc2c1ncnc2N	0.97	https://academic.oup.com/plphys/article/54/5/666/6074092
86	Aldaulactone	C16H16O6	304.29	CC1C/C=C/C(=O)C2=C(C(=C(C=C2CC(=O)O1)O)C(=O)C)O	-0.24	https://www.mdpi.com/2309-608X/8/2/184
87	Allantoin	C4 H6 N4 O3	158.04	NC(=O)NC1NC(=O)NC1=O	0.88	https://apsjournals.apsnet.org/doi/epdf/10.1094/PHYTO-04-20-0114-R
88	Alpha.-d-galactopyranose, 1,2,3-tris-o-(trimethylsilyl)-, cyclic methylboronate	C16H37BO6Si3	420.5	B1(OC[C@@H]2[C@H](O1)[C@@H]([C@H]([C@H](O2)O[Si](C)(C)C)O[Si](C)(C)C)O[Si](C)(C)C)C	-1.27	https://www.sciencedirect.com/science/article/pii/S1018364723003464
89	Alteichin	C20H14O6	350.3	C1[C@@H]([C@@H]2C3=C(C=CC(=C3C1=O)O)C4=C5[C@]2(C=CC(=O)C5=C(C=C4)O)O)O	-0.22	https://www.mdpi.com/2309-608X/8/2/175
90	Altenuene	C15 H16 O6	292.09	COc1cc(O)c2c(c1)C1=CC(O)C(CC1(OC2=O)C)O	-0.5	https://onlinelibrary.wiley.com/doi/epdf/10.1002/mnfr.200700501
91	Altenuene-2-acetoxy ester	C17H18O7	334.32	O=C1O[C@]2(C)C(C3=CC(OC)=CC(O)=C31)=C[C@H](OC(C)=O)[C@@H](O)C2	0.04	https://www.frontiersin.org/journals/microbiology/articles/10.3389/fmicb.2022.1085666/full
92	Altenuene-3-acetoxy ester	C17H18O7	334.32	O=C1O[C@]2(C)C(C3=CC(OC)=CC(O)=C31)=C[C@H](O)[C@@H](OC(C)=O)C2	0.02	https://www.frontiersin.org/journals/microbiology/articles/10.3389/fmicb.2022.1085666/full
93	Altenuic acid	C15 H16 O8	324.08	COc1cc(c(c(c1)O)C(=O)O)C1CC(=O)OC1(C)CC(=O)O	0.17	https://link.springer.com/article/10.1007/s12275-013-3189-3#preview
94	Altenusin	C15 H14 O6	290.08	COc1cc(O)c(c(c1)c1cc(O)c(cc1C)O)C(=O)O	-0.45	https://pubs.rsc.org/en/content/articlehtml/2016/ra/c6ra16214b
95	Alterbrassicicene A	C21H30O5	362.5	C[C@@H]1[C@@H]2CC[C@@](C2=C[C@]3([C@@]4(C(=C(C4=O)C(C)C)C[C@@H]1O3)C)O)(COC)O	0.16	https://www.frontiersin.org/journals/microbiology/articles/10.3389/fmicb.2022.1085666/full
96	Alterchromanone A	C18H22O7	350.4	C[C@@H](CCC[C@@H]1CC(=O)C2=C(C=C(C=C2O1)O)CC(=O)O)OC(=O)C	0.91	https://www.frontiersin.org/journals/microbiology/articles/10.3389/fmicb.2022.1085666/full
97	Altercrasin D	C24H31NO4	397.5	CC=C[C@@H]1C=C2C=C[C@@H]3C[C@@H](CC[C@H]3[C@@]2(C(=O)[C@]14C(=O)[C@@H](NC4=O)[C@@H](C)O)C)C	0.05	https://www.frontiersin.org/journals/microbiology/articles/10.3389/fmicb.2022.1085666/full
98	Altercrasin E	C24H31NO4	397.5	CC=C[C@@H]1C=C2C=C[C@@H]3C[C@@H](CC[C@H]3[C@@]2(C(=O)[C@@]14C(=O)[C@H](NC4=O)[C@@H](C)O)C)C	0.05	https://www.frontiersin.org/journals/microbiology/articles/10.3389/fmicb.2022.1085666/full
99	Alterlactone	C15 H12 O6	288.06	COc1cc(O)c2c(c1)c1cc(O)c(cc1COC2=O)O	-0.97	https://www.frontiersin.org/journals/plant-science/articles/10.3389/fpls.2018.00502/full
100	Alterlosins I	C20H14O7	366.3	C1=CC(=C2C3=C1C4=C5C(=C(C=C4)O)C(=O)C=C[C@]5([C@@H]3[C@H]([C@@H](C2=O)O)O)O)O	-0.16	https://www.mdpi.com/2309-608X/8/2/174
101	Alternafurone A	C15H16O6	292.29	O[C@H](C=C1C)C(O)C[C@@]1(O2)C3=CC(OC)=CC(O)=C3C2=O	-0.3	https://www.frontiersin.org/journals/microbiology/articles/10.3389/fmicb.2022.975579/full
102	Alternapyran	C10H10O2	162.19	OC1=C2C(O[C@H](C)C=C2)=CC=C1	-0.84	https://www.mdpi.com/1467-3045/44/10/346
103	Alternaria A	C35H36O9	600.66	C[C@H]1O[C@@]2(OCC3=C(C(CC4=C(CCC(OC)=O)C=CC=C4O)=CC=C3O)C=C2)[C@H](C)O[C@]51C=CC6=C(CO5)C(O)=CC=C6	0.17	https://www.frontiersin.org/journals/microbiology/articles/10.3389/fmicb.2022.1085666/full
104	Alternaria C	C11H14O4	210.23	COCC1=C(CCC(O)=O)C=CC=C1O	-0.52	https://www.frontiersin.org/journals/microbiology/articles/10.3389/fmicb.2022.1085666/full
105	Alternaria F	C12H16O4	224.26	COCC1=C(CCC(OC)=O)C=CC=C1O	-0.75	https://www.frontiersin.org/journals/microbiology/articles/10.3389/fmicb.2022.1085666/full
106	Alternarian acid	C15 H12 O8	320.05	COc1cc(O)c(c(c1)c1c(C)cc(oc1=O)C(=O)O)C(=O)O	-0.91	https://pubs.acs.org/doi/epdf/10.1021/np900417g?ref=article_openPDF
107	Alternarienonic acid	C14 H14 O6	278.08	COc1cc(O)c(c(c1)C1=C(C)CC(C1=O)O)C(=O)O	0.02	https://sci-hub.se/10.1016/j.ijfoodmicro.2014.11.029
108	alternariol	C14 H10 O5	258.05	Oc1cc(C)c2c(c1)oc(=O)c1c2cc(O)cc1O	-1.3	https://onlinelibrary.wiley.com/doi/full/10.1111/mmi.14258
109	alternariol 9-methyl ether	C15 H12 O5	272.07	COc1cc(O)c2c(c1)c1c(C)cc(cc1oc2=O)O	-1.26	https://journals.plos.org/plosone/article?id=10.1371/journal.pone.0040564
110	Alternaritins B	C23H32O5	388.5	CC(=CCC/C(=C/CC/C(=C/CC1=C(C(=CC(=C1O)OC)C(=O)O)O)/C)/C)C	0.38	https://www.frontiersin.org/journals/microbiology/articles/10.3389/fmicb.2022.1085666/full
111	Alternaritins C	C12H16O3	208.25	C[C@@H]1CC2=C(C(=CC(=C2)O)O)C(O1)(C)C	-0.91	https://www.frontiersin.org/journals/microbiology/articles/10.3389/fmicb.2022.1085666/full
112	Alternata	C16H16O6	304.3	O=C(C(C(O)=CC(OC)=C1)=C1C2=CC(O)=C(O)C=C2C)OC	-0.65	https://www.frontiersin.org/journals/microbiology/articles/10.3389/fmicb.2022.1085666/full
113	Alternatain D	C18H20O9	380.35	OC1=C2C(C3=C[C@@](C[C@H](O)C(O)=O)(O)[C@@H](O)C[C@]3(C)OC2=O)=CC(OC)=C1	0.4	https://www.frontiersin.org/journals/microbiology/articles/10.3389/fmicb.2022.1085666/full
114	alterperylenol	C20 H14 O6	350.08	O=C1CC(O)C2c3c1c(O)ccc3c1c3C2(O)C=CC(=O)c3c(cc1)O	-0.22	https://www.sciencedirect.com/science/article/abs/pii/S0168160518303799
115	Alterporriol A	C32 H26 O13	618.14	COc1cc(O)c2c(c1c1c(OC)cc(c3c1C(=O)c1cc(C)c(cc1C3=O)O)O)C(=O)C1=C(C2=O)C(O)C(C(C1O)(C)O)O	0.37	https://www.mdpi.com/2309-608X/8/2/168
116	Alterporriol B	C32H26O13	618.5	CC1=CC2=C(C=C1O)C(=O)C3=C(C2=O)C(=C(C=C3O)OC)C4=C(C=C(C5=C4C(=O)C6=C(C5=O)[C@@H]([C@H]([C@]([C@@H]6O)(C)O)O)O)O)OC	0.37	https://www.mdpi.com/2309-608X/8/2/179
117	Alterporriol L	C32H26O14	602.14	COc1c(cc(c2c1C(=O)C1=C(C2=O)CC(C(C1O)(C)O)O)O)c1cc(O)c2c(c1OC)C(=O)c1c(C2=O)cc(c(c1)O)C	0.26	https://link.springer.com/article/10.1007/s00253-011-3463-4
118	Alterporriol S	C32 H30 O14	638.16	COc1cc(O)c2c(c1)C(=O)C1=C(C2=O)C(C2C3=C(C(=O)c4c(C3=O)c(O)cc(c4)OC)C(C(C2O)(C)O)O)C(C(C1O)(C)O)O	-0.03	https://www.mdpi.com/1420-3049/19/10/16529
119	Alterporriol T	C32 H30 O13	622.17	COc1cc2C(=O)C3=C(C(=O)c2c(c1c1c(OC)cc(c2c1C(=O)C1=C(C2=O)CC(C(C1O)(C)O)O)O)O)CC(C(C3)(C)O)O	0.06	https://www.mdpi.com/1420-3049/19/10/16529
120	Altersetin	C24 H33 N O4	399.24	CC=CC=CC1C=CC2C(C1(C)C(=C1C(=O)NC(C1=O)C(O)C)O)CCC(C2)C	-0.15	https://www.jstage.jst.go.jp/article/antibiotics1968/55/10/55_10_881/_pdf/-char/en
121	Altersolanol A	C16H16O8	336.29	C[C@]1([C@@H]([C@H](C2=C([C@H]1O)C(=O)C3=C(C2=O)C(=CC(=C3)OC)O)O)O)O	0.09	https://www.frontiersin.org/journals/microbiology/articles/10.3389/fmicb.2022.1085666/full
122	Altertoxin I	C20 H16 O6	352.09	O=C1CC(O)C2c3c1c(O)ccc3c1c3C2(O)CCC(=O)c3c(cc1)O	0.12	https://journals.asm.org/doi/abs/10.1128/aem.52.4.718-722.1986
123	Aminopentol	C22 H47 N O5	405.35	CCCCC(C(C(CC(CC(CCCCC(CC(C(N)C)O)O)O)C)O)O)C	-1.3	https://sci-hub.se/10.1016/S0040-4039(01)90535-0
124	Anserinone B	C11 H14 O4	210.09	COC1=CC(=O)C(=C(C1=O)CC(O)C)C	-0.02	https://link.springer.com/article/10.1186/s12906-019-2752-9
125	ANTHRAQUINONE	C14 H8 O2	208.05	O=C1c2ccccc2C(=O)c2c1cccc2	-0.7	https://pubs.acs.org/doi/epdf/10.1021/np200766d?ref=article_openPDF
126	Anthrininone A	C25H28O10	488.49	C[C@]([C@H](O)C1)(O)CC(C1=C2O)=C(O3)C4=C2C(C=C(OC)[C@]45[C@@]([C@]63C[C@H](O)[C@H](O)CO6)([H])CC(C5)=O)=O	0.2	https://www.frontiersin.org/journals/microbiology/articles/10.3389/fmicb.2022.1085666/full
127	Anthrininones B	C24H23NO9	469.45	O=C1CC[C@H](C(OC)=O)N1CC(O)C2=C(O)C3=C(C(C(C=C(C)C(O)=C4)=C4C3=O)=O)C=C2OC	0.73	https://www.frontiersin.org/journals/microbiology/articles/10.3389/fmicb.2022.1085666/full
128	Aurasperone A	C25 H28 O10	570.15	COc1cc(OC)c2c(c1)c(c1c(OC)cc3c(c1OC)c(O)c1c(c3)oc(cc1=O)C)c1c(c2O)c(=O)cc(o1)C	-0.53	https://link.springer.com/article/10.1186/2191-2858-2-6
129	Azulene,1,4-dimethyl-7-(1-methylethyl)	C15H18	198.3	CC1=C2C=CC(=C2C=C(C=C1)C(C)C)C	-0.9	https://www.sciencedirect.com/science/article/pii/S1319562X18300928
130	Bauvaroalterin A	C22H20O3	332.4	CC(=O)C1=CC(=C(C(=C1)OCC2=CC=CC=C2)CC3=CC=CC=C3)O	0.1	https://onlinelibrary.wiley.com/doi/epdf/10.1002/cbdv.202200751
131	Benzene 1-ethyl-3-methyl-	C9H12	120.19	CC1=CC(CC)=CC=C1	-1.32	https://www.scielo.br/j/aws/a/zJMJZKrbvgRGsSJcdy7brtd/
132	Benzeneethanamine	C8H11N	121.18	NCCC1=CC=CC=C1	-1.34	https://www.frontiersin.org/journals/genetics/articles/10.3389/fgene.2022.1077159/full
133	Benzeneethanol	C8H10O	122.17	OCCC1=CC=CC=C1	-1.67	https://www.sciencedirect.com/science/article/pii/S1319562X18300918
134	Bialternacin E	C30H24O12	576.51	CC1=CC(O)=C(O)C(C2=C3[C@@](OC(C4=C3C=C(OC)C=C4O)=O)(C)C=C(O)C2=O)=C1C5=CC(OC)=CC(O)=C5C(O)=O	0.02	https://www.frontiersin.org/journals/microbiology/articles/10.3389/fmicb.2022.1085666/full
135	Bicycloalternarene F	C21 H30 O6	378.2	CC(=CCCC1(C)OC2=C(CC1O)C(=O)CCC2O)CCC=C(C(=O)O)C	0.7	https://sci-hub.se/10.1016/S0031-9422(00)00268-5
136	Bostrycin	C16H16O8	336.29	C[C@@]1(CC2=C([C@@H]([C@H]1O)O)C(=C3C(=O)C=C(C(=O)C3=C2O)OC)O)O	0.37	https://www.mdpi.com/2309-608X/8/2/176
137	Brassicicene B	C21 H34 O4	350.25	C[C@@H]1[C@@H]\2CC[C@@](/C2=C/[C@]3([C@H](CC(=C3C[C@@H]1O)C(C)C)O)C)(COC)O	0.49	https://sci-hub.se/10.1016/S0031-9422(98)00732-8
138	Brassicicene F	C21 H32 O5	364.22	COCC1(O)CCC2C1=CC1C(=C(C(=O)C1(C)O)C(C)C)CC(C2C)O	0.52	https://sci-hub.se/10.1016/S0031-9422(98)00732-8
139	Brassicicene Q	C21 H30 O5	362.21	COCC1(O)CCC2C1=CC1(O)C(=C)C(=O)C(=C1CC(C2C)O)C(C)C	0.31	https://sci-hub.se/10.1039/C8OB02353K
140	brefeldin A	C16 H24 O4	280.17	OC1CC2C(C1)C=CCCCC(OC(=O)C=CC2O)C	-0.71	https://www.sciencedirect.com/science/article/abs/pii/S0168945298001319
141	Butanenitrile, 4-oxo	C4H5N	67.09	C=CCC#N	-1.35	https://www.frontiersin.org/journals/genetics/articles/10.3389/fgene.2022.1077159/full
142	castochrin	C32H22O12S	630.6	CC1=CC(=C2C(=C1)OC3=C(C2=O)C(=C(C(=C3)O)SC4=C(C5=C(C=C4O)OC6=CC(=CC(=C6C5=O)O)C)C(=O)OC)C(=O)OC)O	-0.51	https://www.frontiersin.org/journals/microbiology/articles/10.3389/fmicb.2022.1085666/full
143	Cephalochromin	C28 H22 O10	518.12	CC1CC(=O)c2c(O1)cc1c(c2O)c(O)cc(c1c1c(O)cc(c2c1cc1OC(C)CC(=O)c1c2O)O)O	-0.54	https://www.tandfonline.com/doi/epdf/10.1080/14786419.2019.1700248?needAccess=true
144	cephalochromin	C28H22O10	518.5	CC1CC(=O)C2=C(O1)C=C3C(=C2O)C(=CC(=C3C4=C(C=C(C5=C(C6=C(C=C54)OC(CC6=O)C)O)O)O)O)O	-0.54	https://www.frontiersin.org/journals/microbiology/articles/10.3389/fmicb.2022.1085666/full
145	chloromonilicin	C16H11ClO7	350.71	O=C1C2=C(C(Cl)=CC(OC2C(OC)=O)=O)OC3=C1C(O)=CC(C)=C3	-0.57	https://www.mdpi.com/2218-273X/10/1/87
146	chloromonilinic acid B	C16H13ClO7	352.72	CC1=CC(=C2C(=C1)OC(=C(C2=O)CC(=O)OC)/C(=C\C(=O)O)/Cl)O	-0.42	https://www.frontiersin.org/journals/microbiology/articles/10.3389/fmicb.2022.1085666/full
147	Cholest-22-ene-21-ol, 3,5-dehydro-6-methoxy-, pivalate	C33H54O3	498.8	CC(C)/C=C/C(C(C)C1CCC2C1(CCC3C2CC(C45C3(CCC4C5)C)OC)C)OC(=O)C(C)(C)C	0.59	https://www.sciencedirect.com/science/article/pii/S1319562X18300935
148	cis-4-hydroxym-ellein	C33 H54 O3	498.41	CC1OC(=O)c2c(C1O)cccc2O	-0.01	https://doi.org/10.1080/14786419.2016.1166498
149	Coumarin, 3,4-dihydro-4,5,7-trimethyl-4,5,7-Trimethyl-2-chromone	C12H14O2	190.24	CC1CC(=O)OC2=CC(=CC(=C12)C)C	-0.68	https://www.frontiersin.org/journals/genetics/articles/10.3389/fgene.2022.1077159/full
150	Cyclic Depsipeptide	C24 H36 N4 O6 S2	540.21	CC=C1NC(=O)C2CSSCCC=CC(OC(=O)C(NC1=O)C(C)C)CC(=O)NC(C(=O)N2)C(C)C	-0.41	https://pubs.acs.org/doi/epdf/10.1021/np900464p?ref=article_openPDF
151	Cyclo(Pro-Ala)	C8 H12 N2 O2	168.09	CC1NC(=O)C2N(C1=O)CCC2	-0.48	https://link.springer.com/article/10.1007/s10593-014-1475-6
152	Cyclo-Ala-Pro-Diketopiperazine	C8H12N2O2	168.2	OC1=NC(C)C(N2C1CCC2)=O	-0.47	https://www.mdpi.com/1467-3045/44/10/344
153	Cyclobutanecarbonitrile	C5H7N	81.12	C1CC(C1)C#N	-1.83	https://www.frontiersin.org/journals/genetics/articles/10.3389/fgene.2022.1077159/full
154	Cycloeicosane	C20H40	280.5	C1CCCCCCCCCCCCCCCCCCC1	-1.16	https://www.sciencedirect.com/science/article/pii/S1319562X18300920
155	cyclohexenone	C6 H8 O	96.06	O=C1CCCC=C1	-1.78	https://www.mdpi.com/1660-3397/13/7/4492Alternaria
156	Cyclopentasiloxane, decamethyl-	C10H30O5Si5	370.77	C[Si]1(O[Si](O[Si](O[Si](O[Si](O1)(C)C)(C)C)(C)C)(C)C)C	-1.37	https://www.frontiersin.org/journals/genetics/articles/10.3389/fgene.2022.1077159/full
157	cyclopentenone	C5 H6 O	82.04	C1CC=CC1=O	-1.71	https://www.mdpi.com/1660-3397/13/7/4492Alternaria
158	Cyclotresiloxane, octamethyl-	C8H24O4Si4	296.61	C[Si]1(O[Si](O[Si](O[Si](O1)(C)C)(C)C)(C)C)C	-1.37	https://www.frontiersin.org/journals/genetics/articles/10.3389/fgene.2022.1077159/full
159	Dasycarpidan-1-methanol, acetate (ester)	C20H26N2O2	326.4	CCC1C2CCN(C1C3=C(C2COC(=O)C)NC4=CC=CC=C43)C	0.02	https://www.sciencedirect.com/science/article/pii/S1319562X18300934
160	dehydroaltenusin	C15 H12 O6	288.06	COc1cc(O)c2c(c1)C1=CC(=O)C(=CC1(OC2=O)C)O	-0.73	https://www.mdpi.com/1420-3049/18/5/5891
161	Deoxyradicinin	C12H12O4	220.22	C/C=C/C1=CC(O[C@@H](C)C2)=C(C(O1)=O)C2=O	-1.01	https://www.mdpi.com/2309-608X/8/2/171
162	Desmethylaltenusin	C14 H12 O6	276.06	Oc1cc(O)c(c(c1)c1cc(O)c(cc1C)O)C(=O)O	-0.57	https://www.beilstein-journals.org/bjoc/content/pdf/1860-5397-20-187.pdf
163	Dichloronitromethane	C H Cl2 N O2	128.94	ClC([N+](=O)[O-])Cl	-0.96	https://journals.plos.org/plosone/article?id=10.1371/journal.pone.0214744
164	Dioschrin	C33H26O13S	662.6	CC1=CC(=C(C(=C1)O)C(=O)C2=C(C=C(C(=C2C(=O)OC)SC3=C(C4=C(C=C3O)OC5=CC(=CC(=C5C4=O)O)C)C(=O)OC)O)OC)O	-0.28	https://www.frontiersin.org/journals/microbiology/articles/10.3389/fmicb.2022.1085666/full
165	d-Norandrostane	C18 H30	246.23	CC12CCCCC1CCC1C2CCC2(C1CC2)C	-0.75	https://www.frontiersin.org/journals/microbiology/articles/10.3389/fmicb.2022.933017/full
166	E-8-Methyl-9-tetradecen-1-ol acetate	C17H32O2	268.44	CCC/C=C\CC(C)CCCCCCCOC(C)=O	-0.88	https://www.sciencedirect.com/science/article/pii/S1319562X18300936
167	Eicosane	C20H42	282.5	CCCCCCCCCCCCCCCCCCCC	-1.03	https://www.sciencedirect.com/science/article/pii/S1018364723003464
168	emodic acid	C15H8O7	300.22	C1=C(C=C(C2=C1C(=O)C3=C(C2=O)C(=CC(=C3)O)O)O)C(=O)O	-0.09	https://www.tandfonline.com/doi/full/10.1080/14786419.2023.2258540#abstract
169	emodin	C15H10O5	270.24	CC1=CC2=C(C(=C1)O)C(=O)C3=C(C2=O)C=C(C=C3O)O	-0.81	https://www.tandfonline.com/doi/full/10.1080/14786419.2023.2258540#abstract
170	Epoxy-decatrienoic acid	C10 H12 O3	180.08	OC(=O)CCCC=CC=CC1=CO1	0.13	https://journals.asm.org/doi/epub/10.1128/ec.00369-09
171	Ergosta-4,6,8,22-tetraen-3-one	C28 H40 O	392.31	CC(C(C=CC(C1CCC2C1(C)CCC1=C2C=CC2=CC(=O)CCC12C)C)C)C	0.09	https://sci-hub.se/10.1021/jf60212a030
172	Ergosta-7,24(28)-dien-3-ol	C28 H46 O	398.35	OC1CCC2(C(C1)CC=C1C2CCC2(C1CCC2C(CCC(=C)C(C)C)C)C)C	-0.09	https://sci-hub.se/10.1021/jf60212a030
173	Ergosterol	C28 H44 O	396.34	OC1CCC2(C(=CC=C3C2CCC2(C3CCC2C(C=CC(C(C)C)C)C)C)C1)C	0.01	https://sci-hub.se/10.1021/jf60212a030
174	Erythritol	C4 H10 O4	122.06	OCC(C(CO)O)O	-0.98	https://www.mdpi.com/1660-3397/18/11/578
175	Erythroglaucin	C16 H12 O6	300.06	COc1cc(O)c2c(c1)C(=O)c1c(C2=O)c(O)cc(c1O)C	-0.58	https://www.mdpi.com/2309-608X/8/2/168
176	Ferulic acid	C10 H10 O4	194.06	COc1cc(C=CC(=O)O)ccc1O	-0.61	https://sci-hub.se/10.1111/lam.13542
177	fonsecin	C15 H14 O6	290.08	COc1cc(O)cc2c1c(O)c1c(c2)OC(CC1=O)(C)O	-0.56	https://doi.org/10.1080/07391102.2023.2191141
178	Fumitremorgin B	C27 H33 N3 O5	479.24	COc1ccc2c(c1)n(CC=C(C)C)c1c2C(O)C2(N(C1C=C(C)C)C(=O)C1N(C2=O)CCC1)O	0.21	https://www.mdpi.com/1420-3049/18/5/5891
179	Fumitremorgin C	C22 H25 N3 O3	379.19	COc1ccc2c(c1)[nH]c1c2CC2N(C1C=C(C)C)C(=O)C1N(C2=O)CCC1	-0.29	https://www.mdpi.com/1420-3049/18/5/5891
180	Helvolic acid	C33 H44 O8	568.3	CC(=O)OC1CC2(C(C1=C(C(=O)O)CCC=C(C)C)CCC1C2(C)C(=O)C(OC(=O)C)C2C1(C)C=CC(=O)C2C)C	1.02	https://www.mdpi.com/1420-3049/18/5/5891
181	Heneicosane	C21H44	296.6	CCCCCCCCCCCCCCCCCCCCCCCC	-1.03	https://www.sciencedirect.com/science/article/pii/S1018364723003464
182	Herbarin A	C15H15O5	236.22	CC1=C(OC(=O)C=C1OC)/C=C/C=C/C(=O)O	-0.79	https://link.springer.com/article/10.1007/s11274-009-0062-y
183	Imidazole-4-carboxylic acid, 2-fluoro-1-methoxymethyl-, ethyl ester	C8 H11 F N2 O3	202.08	COCn1cc(nc1F)C(=O)OCC	-0.67	https://www.ajol.info/index.php/ajb/article/view/126103
184	Indole-3-methylethanote	C11H11NO2	189.21	O=C(CC1=CNC2=CC=CC=C21)OC	-1.49	https://www.frontiersin.org/journals/microbiology/articles/10.3389/fmicb.2022.1085666/full
185	Isoaltenuene	C15 H16 O6	292.09	COc1cc(O)c2c(c1)C1=CC(O)C(CC1(OC2=O)C)O	-0.5	https://link.springer.com/article/10.1007/BF03192124
186	isoochracinic acid	C10 H8 O5	208.04	OC(=O)CC1OC(=O)c2c1cccc2O	-0.39	https://link.springer.com/article/10.1007/s12275-013-3189-3
187	Isosorbide, bis(tertbutyldimethylsilyl) ether	C18H38O4Si2	374.7	CC(C)(C)[Si](C)(C)OC1COC2C1OCC2O[Si](C)(C)C(C)(C)C	-1.6	https://www.sciencedirect.com/science/article/pii/S1018364723003464
188	isotenuazonic acid	C10 H15 N O3	197.11	CC(CC1NC(=O)C(=C1O)C(=O)C)C	-0.55	https://link.springer.com/article/10.1007/s12161-017-1033-9
189	Isoxanalteric acid	C20H12O7	364.3	C1=CC(=C2C(=O)C=CC3=C2C1=C4C=CC(=C5C4=C3[C@H]([C@@H](O5)C(=O)O)O)O)O	-0.23	https://www.frontiersin.org/journals/microbiology/articles/10.3389/fmicb.2022.1085666/full
190	Macrosporin	C16 H12 O5	284.07	COc1cc(O)c2c(c1)C(=O)c1c(C2=O)cc(c(c1)C)O	-0.55	https://www.jstage.jst.go.jp/article/cpb1958/21/9/21_9_2083/_article/-char/ja/
191	Macrosporin	C16H12O5	284.26	CC1=CC2=C(C=C1O)C(=O)C3=C(C2=O)C=C(C=C3O)OC	-0.55	https://www.frontiersin.org/journals/microbiology/articles/10.3389/fmicb.2022.1085666/full
192	Maculosin	C14 H16 N2 O3	260.12	O=C1NC(Cc2ccc(cc2)O)C(=O)N2C1CCC2	0.18	https://www.pnas.org/doi/epdf/10.1073/pnas.85.21.8008
193	Mannitol	C6 H14 O6	182.08	OCC(C(C(C(CO)O)O)O)O	0.1	https://www.sciencedirect.com/science/article/abs/pii/S1087184506001848
194	metacytofilin	C16H22N2O4	306.36	CC(C)C[C@@]1(C(=O)N[C@](C(=O)O1)(CC2=CC=CC=C2)O)NC	0.41	https://link.springer.com/article/10.1186/s12906-019-2752-9
195	Methyl 11-docosenoate	C23H44O2	352.6	CCCCCCCCCC/C=C/CCCCCCCCCC(=O)OC	-1.04	https://www.sciencedirect.com/science/article/pii/S1018364723003464
196	methyl 3,8-dihydroxy-6-methyl-4-chloro-9-oxo-9H-xanthene-1-carboxylate	C16H11ClO6	334.71	O=C1C2=C(C(Cl)=C(O)C([H])=C2C(OC)=O)OC3=C1C(O)=CC(C)=C3	-0.44	https://www.mdpi.com/2218-273X/10/1/83
197	methyl 3,8-dihydroxy-6-methyl-9-oxo-9Hxanthene-1-carboxylate	C16H12O6	300.27	OC1=CC(C)=CC(OC3=C2C(C(OC)=O)=C(O)C([H])=C3[H])=C1C2=O	-0.23	https://www.frontiersin.org/journals/microbiology/articles/10.3389/fmicb.2022.1085666/full
198	methyl 3,8-dihydroxy-6-methyl-9-oxo-9H-xanthene-1-carboxylate	C16H12O6	300.27	O=C1C2=C(C([H])=C(O)C([H])=C2C(OC)=O)OC3=C1C(O)=CC(C)=C3	-0.51	https://www.mdpi.com/2218-273X/10/1/85
199	methyl 8-dihydroxy-3-methyl-4-chloro-9-oxo-9H-xanthene-1-carboxylate	C16H11ClO5	318.03	O=C1C2=C(C(Cl)=C(C)C=C2C(OC)=O)OC3=C1C(O)=CC=C3	0.06	https://www.mdpi.com/2218-273X/10/1/81
200	methyl 8-hydroxy-6-methyl-9-oxo-9H-xanthene-1-carboxylate	C16H12O5	284.27	O=C1C2=C(C([H])=C([H])C([H])=C2C(OC)=O)OC3=C1C(O)=CC(C)=C3	0.15	https://www.mdpi.com/2218-273X/10/1/86
201	Methyl linolelaidate	C19H34O2	294.5	CCCCC/C=C/C/C=C/CCCCCCCC(=O)OC	-1.04	https://www.sciencedirect.com/science/article/pii/S1018364723003464
202	Methyl palmitate	C17H34O2	270.5	CCCCCCCCCCCCCCCC(=O)OC	-1.31	https://www.sciencedirect.com/science/article/pii/S1018364723003464
203	moniliphenone	C16H14O6	302.28	O=C(C1=C(O)C=C(C)C=C1O)C2=C(O)C([H])=CC=C2C(OC)=O	0	https://www.mdpi.com/2218-273X/10/1/88
204	N-Acetylanthranilic acid	C9H9NO3	179.17	CC(=O)NC1=CC=CC=C1C(=O)O	-0.1	https://www.mdpi.com/2077-0472/10/11/543
205	Naphthalene	C10H8	128.17	C1=CC=C2C=CC=CC2=C1	-1.96	https://www.sciencedirect.com/science/article/pii/S1319562X18300923
206	ochratoxin A methyl ester	C21 H20 Cl N O6	417.1	COC(=O)C(NC(=O)c1cc(Cl)c2c(c1O)C(=O)OC(C2)C)Cc1ccccc1	0.53	https://doi.org/10.1080/14786419.2016.1166498
207	Octacosane	C28H58	394.8	CCCCCCCCCCCCCCCCCCCCCCCCCCCC	-1.03	https://www.sciencedirect.com/science/article/pii/S1018364723003464
208	Orthosporin	C12 H12 O5	236.07	CC(Cc1oc(=O)c2c(c1)cc(cc2O)O)O	0.02	https://journals.plos.org/plosone/article?id=10.1371/journal.pone.0090473
209	Oxytropiol A	C15H24O4	268.35	C[C@@H]1C[C@@H]([C@@H]2[C@@H]1C=C(C(=O)C[C@]2(CO)O)C(C)C)O	0.03	https://www.frontiersin.org/journals/microbiology/articles/10.3389/fmicb.2022.1085666/full
210	pachybasic acid	C15H8O5	268.22	C1=CC=C2C(=C1)C(=O)C3=C(C2=O)C(=CC(=C3)C(=O)O)O	0.07	https://www.tandfonline.com/doi/full/10.1080/14786419.2023.2258540#abstract
211	Pentatriacontane	C35H72	492.9	CCCCCCCCCCCCCCCCCCCCCCCCCCCCCCCCCCC	-1.03	https://www.sciencedirect.com/science/article/pii/S1018364723003464
212	phelligridin B	C15 H12 O7	304.06	COC(=O)c1c(O)cc(oc1=O)C=Cc1ccc(c(c1)O)O	-0.36	https://link.springer.com/article/10.1186/s12906-019-2752-9
213	Phenol, 2,4-bis(1,1-dimethylethyl)-	C16H26O	234.38	OC1=C(C(C)(C)C)C=C(C(C)(C)C)C(CC)=C1	-1.19	https://www.sciencedirect.com/science/article/pii/S1319562X18300925
214	Phenol, 2,4-di-t-butyl-6-nitro	C14H21NO3	251.32	CC(C)(C)C1=CC(=C(C(=C1)[N+](=O)[O-])O)C(C)(C)C	-1.2	https://www.sciencedirect.com/science/article/pii/S1319562X18300924
215	phenylethyl alcohol	C8 H10 O	122.07	OCCc1ccccc1	-1.67	https://journals.asm.org/doi/full/10.1128/spectrum.02713-22
216	phenylpropene	C9 H10	118.08	CC(=C)c1ccccc1	-2.23	https://www.sciencedirect.com/science/article/abs/pii/S0925521423002016
217	phomarin	C15H10O4	254.24	CC1=CC2=C(C(=C1)O)C(=O)C3=C(C2=O)C=C(C=C3)O	-0.27	https://www.tandfonline.com/doi/full/10.1080/14786419.2023.2258540#abstract
218	phomopsidin	C21 H30 O3	330.22	CC=C(C1C(=CC2C(C1C=CC=CC(=O)O)C(C)CCC2O)C)C	0.18	https://link.springer.com/article/10.1186/s12906-019-2752-9
219	p-Hydroxybenzoic acid	C7H6O3	138.12	C1=CC(=CC=C1C(=O)O)O	-0.37	https://www.mdpi.com/2309-608X/8/2/186
220	Physcion	C16H12O5	284.26	CC1=CC2=C(C(=C1)O)C(=O)C3=C(C2=O)C=C(C=C3O)OC	-0.81	https://www.mdpi.com/2309-608X/8/2/178
221	pinselin	C16H12O6	300.26	CC1=CC(=C2C(=C1)OC3=C(C2=O)C(=C(C=C3)O)C(=O)OC)O	-0.23	https://www.mdpi.com/2218-273X/10/1/84
222	Polluxochrin	C34H30O14S	694.7	CC1=CC(=C(C(=C1)O)C(=O)C2=C(C=C(C(=C2C(=O)OC)SC3=C(C(=C(C=C3O)OC)C(=O)C4=C(C=C(C=C4O)C)O)C(=O)OC)O)OC)O	-0.62	https://www.frontiersin.org/journals/microbiology/articles/10.3389/fmicb.2022.1085666/full
223	Prenylcephalochromin A	C33H28O10	584.58	CC1(C)OC([C@]([C@]2=C3C=C(C4=C(O)C3=C(O)C=C2O)O[C@H](C)CC4=O)=C5C(C(O)=C(C(C[C@@H](C)O6)=O)C6=C5)=C7O)=C7C=C1	-0.46	https://www.frontiersin.org/journals/microbiology/articles/10.3389/fmicb.2022.1085666/full
224	prenylcephalochromin B	C33H28O9	568.58	O=C1C2=C(O)C3=C4C(C=CC(C)(C)O4)=C[C@]([C@]5=C6C=C(C7=C(O)C6=C(O)C=C5O)O[C@H](C)CC7=O)=C3C=C2O[C@H](C)C1	-0.44	https://www.frontiersin.org/journals/microbiology/articles/10.3389/fmicb.2022.1085666/full
225	Propanenitrile	C3H5N	55.08	CCC#N	-1.35	https://www.frontiersin.org/journals/genetics/articles/10.3389/fgene.2022.1077159/full
226	Propanoic acid, ethyl ester	C5H10O2	102.13	CCC(=O)OCC	-1.75	https://www.sciencedirect.com/science/article/pii/S1319562X18300932
227	Propargylamine	C3H5N	55.08	C#CCN	-1.18	https://www.frontiersin.org/journals/genetics/articles/10.3389/fgene.2022.1077159/full
228	protocatechuic acid	C7 H6 O4	154.03	OC(=O)c1ccc(c(c1)O)O	0.23	https://doi.org/10.1080/14786419.2016.1166498
229	Pyrenocine A	C11H12O4	208.21	CC1=C(C(/C=C/C)=O)C(OC)=CC(O1)=O	-1.04	https://www.mdpi.com/2309-608X/8/2/172
230	Pyrenocine B	C11H14O5	226.23	CC1=C(C(CC(O)C)=O)C(OC)=CC(O1)=O	-0.65	https://www.mdpi.com/2309-608X/8/2/172
231	Pyrenophorol	C16 H24 O6	312.16	OC1CCC(C)OC(=O)C=CC(CCC(OC(=O)C=C1)C)O	-1.43	https://link.springer.com/article/10.1007/s00204-016-1855-z
232	Pyrophen	C16 H17 N O4	287.12	COc1cc(oc(=O)c1)C(Cc1ccccc1)NC(=O)C	-0.38	https://link.springer.com/article/10.1186/2191-2858-2-6
233	Pyrrole(1,2-apyrizine-1,4-dione, hexahydro-3-(2-methyl propyl)-	C11H18N2O2	210.28	CC(C)CC1NC(C2N(CCC2)C1=O)=O	-0.15	https://www.frontiersin.org/journals/genetics/articles/10.3389/fgene.2022.1077159/full
234	Radicinin	C12H12O5	236.22	C/C=C/C1=CC2=C(C(=O)[C@H]([C@@H](O2)C)O)C(=O)O1	-0.35	https://www.mdpi.com/2309-608X/8/2/168
235	Radicinol	C12H14O5	238.24	C/C=C/C1=CC2=C([C@@H]([C@H]([C@@H](O2)C)O)O)C(=O)O1	-0.27	https://www.mdpi.com/2309-608X/8/2/169
236	resveratrol	C14 H12 O3	228.08	Oc1ccc(cc1)C=Cc1cc(O)cc(c1)O	-1	https://link.springer.com/article/10.1007/s00253-012-4045-9
237	Retronecine	C8 H13 N O2	155.09	OCC1=CCN2C1C(O)CC2	-0.77	https://link.springer.com/article/10.1186/s12866-019-1408-8
238	Sesteralterin	C25 H38 O4	402.28	CC(C1CC(C2(C1CC1(O)C(C2)C(C)CCC2C3=C1C(=O)OC3CC2C)C)O)C	-0.59	https://pubs.acs.org/doi/epdf/10.1021/acs.jnatprod.7b00478?ref=article_openPDF
239	Sesteralterin	C25H38O4	402.6	C[C@H]1CC[C@H]2[C@H](C[C@H]3C2=C(C(=O)O3)[C@@]4([C@@H]1C[C@]5([C@@H](C[C@@H]([C@@H]5C4)C(C)C)O)C)O)C	-0.59	https://www.frontiersin.org/journals/microbiology/articles/10.3389/fmicb.2022.1085666/full
240	Solanapyrone B	C18H24O4	304.4	C[C@H]1C=C[C@H]2CCCC[C@H]2[C@@H]1C3=CC(=C(C(=O)O3)CO)OC	-0.61	https://www.mdpi.com/2309-608X/8/2/173
241	Solanapyrone C	C19H25NO4	331.4	C[C@H]1C=C[C@H]2CCCC[C@H]2[C@@H]1C3=CC(=C(C(=O)O3)C=O)NCCO	-0.27	https://www.mdpi.com/2309-608X/8/2/173
242	Solanapyrone G	C15H16O6	287.35	C[C@H]1C=C[C@H]2CCCC[C@H]2[C@@H]1C3=CC(=C(C(=O)O3)C=O)N	-0.63	https://www.mdpi.com/1467-3045/44/10/347
243	Solanapyrones A	C18H22O4	302.4	C[C@H]1C=C[C@H]2CCCC[C@H]2[C@@H]1C3=CC(=C(C(=O)O3)C=O)OC	-0.98	https://www.mdpi.com/2309-608X/8/2/173
244	Stemphyltoxin III	C20 H12 O6	348.06	Oc1ccc2c3c1C(=O)C1OC1C3C1(c3c2ccc(c3C(=O)C=C1)O)O	-0.67	https://www.sciencedirect.com/science/article/abs/pii/S0378427412012398
245	Stemphyperylenol	C20 H16 O6	352.09	OC1CC(=O)c2c3C1c1ccc(c4c1C(c3ccc2O)C(O)CC4=O)O	-0.21	https://www.mdpi.com/2309-608X/8/2/168
246	Swainsonine	C8 H15 N O3	173.11	OC1CN2C(C1O)C(O)CCC2	-0.67	https://www.nature.com/articles/s41598-019-42173-2
247	Swainsonine	C8H15NO3	173.21	C1C[C@H]([C@@H]2[C@@H]([C@@H](CN2C1)O)O)O	-0.67	https://www.frontiersin.org/journals/microbiology/articles/10.3389/fmicb.2022.1085666/full
248	Swainsonine N-oxide	C8 H15 N O4	189.1	OC1C[N+]2(C(C1O)C(O)CCC2)[O-]	-0.79	https://link.springer.com/article/10.1186/s12866-019-1408-8
249	Tanzawaic acid F	C18 H24 O4	304.17	OC(=O)C=CC=CC1C(C)C=CC2C1C(C)CC(C2)C(=O)O	-0.79	https://www.mdpi.com/2076-0817/10/11/1448
250	taxol	C47 H51 N O14	853.33	CC(=O)OC1C(=O)C2(C)C(O)CC3C(C2C(C2(C(C1=C(C)C(OC(=O)C(C(c1ccccc1)NC(=O)c1ccccc1)O)C2)(C)C)O)OC(=O)c1ccccc1)(CO3)OC(=O)C	0.59	https://link.springer.com/article/10.1007/s11274-019-2651-8
251	Tentoxin	C22H30N4O4	414.5	C[C@H]1C(=O)N[C@H](C(=O)N(/C(=C\C2=CC=CC=C2)/C(=O)NCC(=O)N1C)C)CC(C)C	-0.4	https://www.mdpi.com/2309-608X/8/2/182
252	Tenuazonic acid	C10 H15 N O3	197.11	CCC(C1NC(=O)C(=C1O)C(=O)C)C	-0.52	https://journals.asm.org/doi/abs/10.1128/aem.34.2.155-157.1977
253	Tetracosane	C24H50	338.7	CCCCCCCCCCCCCCCCCCCCCCCC	-1.03	https://www.sciencedirect.com/science/article/pii/S1018364723003464
254	Tetrahydroanthraquinone	C14 H12 O2	212.08	O=C1C2=C(CCCC2)C(=O)c2c1cccc2	-0.22	https://www.mdpi.com/1420-3049/19/10/16529
255	Tetramic acid	C4 H5 N O2	99.03	OC1=CC(=O)NC1	-1.05	https://onlinelibrary.wiley.com/doi/full/10.1002/mnfr.201900558
256	Thujopsene	C15H24	204.35	CC1=CC[C@@]2(CCCC([C@]23[C@H]1C3)(C)C)C	-1.1	https://www.mdpi.com/1420-3049/28/18/6531
257	trans-2-anhydromevalonic	C6H10O3	130.14	C/C(CCO)=C\C(O)=O	-1.14	https://doi.org/10.1080/14786419.2016.1166498
258	Trichloroacetic acid, 2-tetradecyl ester	C16H29Cl3O2	359.8	CCCCCCCCCCCCC(C)OC(=O)C(Cl)(Cl)Cl	-0.68	https://www.scielo.br/j/aws/a/zJMJZKrbvgRGsSJcdy7brtd/
259	Tricyclicalternan Q	C22H34O5	378.51	CC(O)(C)[C@H](O)C/C([H])=C(C)\[C@@](CC1)([H])[C@]([C@]1(C)O2)([H])CC3=C2C([H])CC(OC)C3=O	0.87	https://www.frontiersin.org/journals/microbiology/articles/10.3389/fmicb.2022.1085666/full
260	Tricyclicalternan R	C21H32O5	364.22	CC(O)(C)[C@H](O)C/C([H])=C(C)\[C@@](CC1)([H])[C@]([C@]1(C)O2)([H])CC3=C2C([H])CC(O)C3=O	0.89	https://www.frontiersin.org/journals/microbiology/articles/10.3389/fmicb.2022.1085666/full
261	Tricyclicalternan S 189	C21H30O4	346.47	O[C@@H](C(C)=C)C/C([H])=C(C)\[C@@](CC1)([H])[C@]([C@]1(C)O2)([H])CC3=C2[C@@H](O)CCC3=O	0.53	https://www.frontiersin.org/journals/microbiology/articles/10.3389/fmicb.2022.1085666/full
262	Tricyclicalternan T	C22H34O5	378.51	CC(O)(C)[C@H](O)C/C([H])=C(C)\[C@@](CC1)([H])[C@]([C@]1(C)O2)([H])CC3=C2C(OC)CC([H])C3=O	0.81	https://www.frontiersin.org/journals/microbiology/articles/10.3389/fmicb.2022.1085666/full
263	Tricyclicalternan U	C21H32O5	364.22	CC(O)(C)[C@H](O)C/C([H])=C(C)\[C@@](CC1)([H])[C@]([C@]1(C)O2)([H])CC3=C2C(O)CC([H])C3=O	0.85	https://www.frontiersin.org/journals/microbiology/articles/10.3389/fmicb.2022.1085666/full
264	Tricyclicalternan V	C22H34O5	378.51	CC(C)(OC)[C@H](O)C/C([H])=C(C)\[C@@](CC1)([H])[C@]([C@]1(C)O2)([H])CC3=C2C(O)CC([H])C3=O	0.79	https://www.frontiersin.org/journals/microbiology/articles/10.3389/fmicb.2022.1085666/full
265	Tricyclicalternan W	C21H30O4	346.47	O/C(C/C([H])=C(C)\[C@@](CC1)([H])[C@]([C@]1(C)O2)([H])CC3=C2[C@@H](O)CCC3=O)=C(C)\C	0.85	https://www.frontiersin.org/journals/microbiology/articles/10.3389/fmicb.2022.1085666/full
266	Tricycloalterfurene A	C21 H30 O4	346.21	CC(=CC1OC2C(C1)(C)OC1=C(C2)C(=O)CCC1O)CCC=C(C)C	0.32	https://pubs.acs.org/doi/epdf/10.1021/acs.jnatprod.7b00478?ref=article_openPDF
267	Tricycloalterfurene B	C15 H15 N O3	257.11	OOC(C=CCC(=CC1OC2C(C1)(C)OC1=C(C2)C(=O)CCC1O)C)(C)C	0.29	https://pubs.acs.org/doi/epdf/10.1021/acs.jnatprod.7b00478?ref=article_openPDF
268	Tricycloalterfurene C	C21 H32 O6	380.22	CC(=CC1OC2C(C1)(C)OC1=C(C2)C(=O)CCC1O)CCC(C(O)(C)C)O	0.56	https://pubs.acs.org/doi/epdf/10.1021/acs.jnatprod.7b00478?ref=article_openPDF
269	Uric acid	C5 H4 N4 O3	168.03	O=c1[nH]c2c([nH]1)[nH]c(=O)[nH]c2=O	-1.25	https://www.sciencedirect.com/science/article/abs/pii/S0009279722001533
270	Uridine	C9 H12 N2 O6	244.07	OCC1OC(C(C1O)O)n1ccc(=O)[nH]c1=O	1.07	https://www.mdpi.com/1420-3049/18/5/5891
271	ursolic acid	C30H48O3	456.7	C[C@@H]1CC[C@@]2(CC[C@@]3(C(=CC[C@H]4[C@]3(CC[C@@H]5[C@@]4(CC[C@@H](C5(C)C)O)C)C)[C@@H]2[C@H]1C)C)C(=O)O	0.66	https://www.tandfonline.com/doi/full/10.1080/07391102.2023.2236717#abstract
272	vermixocin A	C21H24O6	372.4	CC1=CC2=C(C(=C1)O)OC3=C(C(=C(C=C3)[C@H](CC(C)C)O)OC)C(=O)OC2	0.91	https://link.springer.com/article/10.1186/s12906-019-2752-9
273	xanalteric acid	C20H12O7	364.3	C1=CC(=C2C3=C(C(C(O2)C(=O)O)O)C4=C5C(=C31)C=CC(=O)C5=C(C=C4)O)O	-0.05	https://www.mdpi.com/2076-2607/8/12/1934
274	xanalteric acid II	C20 H12 O7	364.06	O=C1C=Cc2c3c1c(O)ccc3c1c3c2ccc(c3OC(C1)(O)C(=O)O)O	-0.25	https://pubs.acs.org/doi/epdf/10.1021/np900417g?ref=article_openPDF
275	Z-(13,14-Epoxy)tetradec-11-en-1-ol acetate	C16H28O3	268.39	CC(=O)OCCCCCCCCCC/C=C\C1CO1	-0.9	https://www.sciencedirect.com/science/article/pii/S1319562X18300930
276	Zinniol	C15 H22 O4	266.15	COc1c(C)c(OCC=C(C)C)cc(c1CO)CO	0.26	https://www.apsnet.org/publications/phytopathology/backissues/Documents/1984Articles/Phyto74n07_785.pdf
277	α -Acetylorcinol	C9H10O3	166.18	CC(CC1=CC(O)=CC(O)=C1)=O	-1.47	https://www.mdpi.com/2309-608X/8/2/185
278	β-sitosterol	C29H50O	414.7	CC[C@H](CC[C@@H](C)[C@H]1CC[C@@H]2[C@@]1(CC[C@H]3[C@H]2CC=C4[C@@]3(CC[C@@H](C4)O)C)C)C(C)C	0.78	https://www.tandfonline.com/doi/full/10.1080/07391102.2023.2236717#abstract
	Total compunds = 278

## Sheet: S2
	ADMET (MolSoft filter of compounds with cutoff value of 0.18)
Molecule	Compound Name	Molecular formula	Mol wt	Canonical SMILES	MolSoft (Drug-likness)
22	15-hydroxytricycloalternarenes	C23H32O5	388.5	CC(CC/C=C(C)/COC(C)=O)C1=C[C@@]([H])([H])[C@](O3)(C)[C@]([H])1CC2=C3C(O)CCC2=O	0.79
23	17-O-methyltricycloalternarene D	C24H36O5	404.55	C[C@H](CCC[C@H](C)COC(C)=O)C1=CC[C@](O3)(C)[C@]([H])1CC2=C3CC[C@@H](OC)C2=O	0.64
33	1β,2β-Epoxybrassicicene	C21H34O4	350.5	O[C@H]2CC1=C(C(C)C)CC[C@@](C)1[C@@H]4[C@@]3(O4)[C@](CC[C@@](O)3COC)([H])[C@H]2C	0.27
34	2-(2'S-hydroxypropyl)-5-methyl-7-hydroxychromone/Aloesol	C13 H14 O4	234.09	CC(Cc1cc(=O)c2c(o1)cc(cc2C)O)O	0.26
60	3β,5α-Dihydroxy-(22E,24R)-ergosta-7,22-dien-6-one	C28H44O3	428.6	C[C@H](/C=C/[C@H](C)C(C)C)[C@H]1CC[C@@H]2[C@@]1(CC[C@H]3C2=CC(=O)[C@@]4([C@@]3(CC[C@@H](C4)O)C)O)C	0.69
61	3β-Hydroxy-(22E,24R)-ergosta-5,8,22-trien-7-one	C28H42O2	410.64	O[C@H](C1)CC[C@@]2(C)C1=CC(C3=C2CC[C@@]4(C)C3CCC4[C@@H](/C=C/[C@H](C)C(C)C)C)=O	0.68
62	4-chloro-1,5-dihydroxy-3-hydroxymethyl-6-methoxycarbonyl-xanthen-9-one	C16 H11 Cl O7	350.02	COC(=O)c1ccc2c(c1O)oc1c(c2=O)c(O)cc(c1Cl)CO	0.33
64	4-Deoxybostrycin	C16H16O7	320.3	CC(C1)(O)C(O)CC2=C1C(C3=C(O)C(OC)=CC(O)=C3C2=O)=O	0.2
79	7-epi-8-hydroxyaltertoxin I	C16 H22 O4	278.15	OC1C(O)C(=O)c2c3C1C1(O)CCC(=O)c4c1c(c3ccc2O)ccc4O	0.71
83	9-octadecenoic acid (z)-, methyl ester	C19H36O2	296.5	CCCCCCCCC=CCCCCCCCC(=O)OC	0.29
85	Adenosine	C10 H13 N5 O4	267.1	OCC1OC(C(C1O)O)n1cnc2c1ncnc2N	0.97
87	Allantoin	C4 H6 N4 O3	158.04	NC(=O)NC1NC(=O)NC1=O	0.88
96	Alterchromanone A	C18H22O7	350.4	C[C@@H](CCC[C@@H]1CC(=O)C2=C(C=C(C=C2O1)O)CC(=O)O)OC(=O)C	0.91
110	Alternaritins B	C23H32O5	388.5	CC(=CCC/C(=C/CC/C(=C/CC1=C(C(=CC(=C1O)OC)C(=O)O)O)/C)/C)C	0.38
113	Alternatain D	C18H20O9	380.35	OC1=C2C(C3=C[C@@](C[C@H](O)C(O)=O)(O)[C@@H](O)C[C@]3(C)OC2=O)=CC(OC)=C1	0.4
115	Alterporriol A	C32 H26 O13	618.14	COc1cc(O)c2c(c1c1c(OC)cc(c3c1C(=O)c1cc(C)c(cc1C3=O)O)O)C(=O)C1=C(C2=O)C(O)C(C(C1O)(C)O)O	0.37
116	Alterporriol B	C32H26O13	618.5	CC1=CC2=C(C=C1O)C(=O)C3=C(C2=O)C(=C(C=C3O)OC)C4=C(C=C(C5=C4C(=O)C6=C(C5=O)[C@@H]([C@H]([C@]([C@@H]6O)(C)O)O)O)O)OC	0.37
117	Alterporriol L	C32H26O14	602.14	COc1c(cc(c2c1C(=O)C1=C(C2=O)CC(C(C1O)(C)O)O)O)c1cc(O)c2c(c1OC)C(=O)c1c(C2=O)cc(c(c1)O)C	0.26
126	Anthrininone A	C25H28O10	488.49	C[C@]([C@H](O)C1)(O)CC(C1=C2O)=C(O3)C4=C2C(C=C(OC)[C@]45[C@@]([C@]63C[C@H](O)[C@H](O)CO6)([H])CC(C5)=O)=O	0.2
127	Anthrininones B	C24H23NO9	469.45	O=C1CC[C@H](C(OC)=O)N1CC(O)C2=C(O)C3=C(C(C(C=C(C)C(O)=C4)=C4C3=O)=O)C=C2OC	0.73
135	Bicycloalternarene F	C21 H30 O6	378.2	CC(=CCCC1(C)OC2=C(CC1O)C(=O)CCC2O)CCC=C(C(=O)O)C	0.7
136	Bostrycin	C16H16O8	336.29	C[C@@]1(CC2=C([C@@H]([C@H]1O)O)C(=C3C(=O)C=C(C(=O)C3=C2O)OC)O)O	0.37
137	Brassicicene B	C21 H34 O4	350.25	C[C@@H]1[C@@H]\2CC[C@@](/C2=C/[C@]3([C@H](CC(=C3C[C@@H]1O)C(C)C)O)C)(COC)O	0.49
138	Brassicicene F	C21 H32 O5	364.22	COCC1(O)CCC2C1=CC1C(=C(C(=O)C1(C)O)C(C)C)CC(C2C)O	0.52
139	Brassicicene Q	C21 H30 O5	362.21	COCC1(O)CCC2C1=CC1(O)C(=C)C(=O)C(=C1CC(C2C)O)C(C)C	0.31
147	Cholest-22-ene-21-ol, 3,5-dehydro-6-methoxy-, pivalate	C33H54O3	498.8	CC(C)/C=C/C(C(C)C1CCC2C1(CCC3C2CC(C45C3(CCC4C5)C)OC)C)OC(=O)C(C)(C)C	0.59
178	Fumitremorgin B	C27 H33 N3 O5	479.24	COc1ccc2c(c1)n(CC=C(C)C)c1c2C(O)C2(N(C1C=C(C)C)C(=O)C1N(C2=O)CCC1)O	0.21
180	Helvolic acid	C33 H44 O8	568.3	CC(=O)OC1CC2(C(C1=C(C(=O)O)CCC=C(C)C)CCC1C2(C)C(=O)C(OC(=O)C)C2C1(C)C=CC(=O)C2C)C	1.02
192	Maculosin	C14 H16 N2 O3	260.12	O=C1NC(Cc2ccc(cc2)O)C(=O)N2C1CCC2	0.18
194	metacytofilin	C16H22N2O4	306.36	CC(C)C[C@@]1(C(=O)N[C@](C(=O)O1)(CC2=CC=CC=C2)O)NC	0.41
206	ochratoxin A methyl ester	C21 H20 Cl N O6	417.1	COC(=O)C(NC(=O)c1cc(Cl)c2c(c1O)C(=O)OC(C2)C)Cc1ccccc1	0.53
218	phomopsidin	C21 H30 O3	330.22	CC=C(C1C(=CC2C(C1C=CC=CC(=O)O)C(C)CCC2O)C)C	0.18
228	protocatechuic acid	C7 H6 O4	154.03	OC(=O)c1ccc(c(c1)O)O	0.23
250	taxol	C47 H51 N O14	853.33	CC(=O)OC1C(=O)C2(C)C(O)CC3C(C2C(C2(C(C1=C(C)C(OC(=O)C(C(c1ccccc1)NC(=O)c1ccccc1)O)C2)(C)C)O)OC(=O)c1ccccc1)(CO3)OC(=O)C	0.59
259	Tricyclicalternan Q	C22H34O5	378.51	CC(O)(C)[C@H](O)C/C([H])=C(C)\[C@@](CC1)([H])[C@]([C@]1(C)O2)([H])CC3=C2C([H])CC(OC)C3=O	0.87
260	Tricyclicalternan R	C21H32O5	364.22	CC(O)(C)[C@H](O)C/C([H])=C(C)\[C@@](CC1)([H])[C@]([C@]1(C)O2)([H])CC3=C2C([H])CC(O)C3=O	0.89
261	Tricyclicalternan S 189	C21H30O4	346.47	O[C@@H](C(C)=C)C/C([H])=C(C)\[C@@](CC1)([H])[C@]([C@]1(C)O2)([H])CC3=C2[C@@H](O)CCC3=O	0.53
262	Tricyclicalternan T	C22H34O5	378.51	CC(O)(C)[C@H](O)C/C([H])=C(C)\[C@@](CC1)([H])[C@]([C@]1(C)O2)([H])CC3=C2C(OC)CC([H])C3=O	0.81
263	Tricyclicalternan U	C21H32O5	364.22	CC(O)(C)[C@H](O)C/C([H])=C(C)\[C@@](CC1)([H])[C@]([C@]1(C)O2)([H])CC3=C2C(O)CC([H])C3=O	0.85
264	Tricyclicalternan V	C22H34O5	378.51	CC(C)(OC)[C@H](O)C/C([H])=C(C)\[C@@](CC1)([H])[C@]([C@]1(C)O2)([H])CC3=C2C(O)CC([H])C3=O	0.79
265	Tricyclicalternan W	C21H30O4	346.47	O/C(C/C([H])=C(C)\[C@@](CC1)([H])[C@]([C@]1(C)O2)([H])CC3=C2[C@@H](O)CCC3=O)=C(C)\C	0.85
266	Tricycloalterfurene A	C21 H30 O4	346.21	CC(=CC1OC2C(C1)(C)OC1=C(C2)C(=O)CCC1O)CCC=C(C)C	0.32
267	Tricycloalterfurene B	C15 H15 N O3	257.11	OOC(C=CCC(=CC1OC2C(C1)(C)OC1=C(C2)C(=O)CCC1O)C)(C)C	0.29
268	Tricycloalterfurene C	C21 H32 O6	380.22	CC(=CC1OC2C(C1)(C)OC1=C(C2)C(=O)CCC1O)CCC(C(O)(C)C)O	0.56
270	Uridine	C9 H12 N2 O6	244.07	OCC1OC(C(C1O)O)n1ccc(=O)[nH]c1=O	1.07
271	ursolic acid	C30H48O3	456.7	C[C@@H]1CC[C@@]2(CC[C@@]3(C(=CC[C@H]4[C@]3(CC[C@@H]5[C@@]4(CC[C@@H](C5(C)C)O)C)C)[C@@H]2[C@H]1C)C)C(=O)O	0.66
272	vermixocin A	C21H24O6	372.4	CC1=CC2=C(C(=C1)O)OC3=C(C(=C(C=C3)[C@H](CC(C)C)O)OC)C(=O)OC2	0.91
276	Zinniol	C15 H22 O4	266.15	COc1c(C)c(OCC=C(C)C)cc(c1CO)CO	0.26
278	β-sitosterol	C29H50O	414.7	CC[C@H](CC[C@@H](C)[C@H]1CC[C@@H]2[C@@]1(CC[C@H]3[C@H]2CC=C4[C@@]3(CC[C@@H](C4)O)C)C)C(C)C	0.78
	Total compunds = 49

## Sheet: S3
	ADMET (Toxicity filter of class >=4 )
Molecule	Compound Name	Molecular formula	Mol wt	Canonical SMILES	MolSoft (Drug-likness)	ProTox (toxicity class)
22	15-hydroxytricycloalternarenes	C23H32O5	388.5	CC(CC/C=C(C)/COC(C)=O)C1=C[C@@]([H])([H])[C@](O3)(C)[C@]([H])1CC2=C3C(O)CCC2=O	0.79	4
23	17-O-methyltricycloalternarene D	C24H36O5	404.55	C[C@H](CCC[C@H](C)COC(C)=O)C1=CC[C@](O3)(C)[C@]([H])1CC2=C3CC[C@@H](OC)C2=O	0.64	4
33	1β,2β-Epoxybrassicicene (12epoxy)	C21H34O4	350.5	O[C@H]2CC1=C(C(C)C)CC[C@@](C)1[C@@H]4[C@@]3(O4)[C@](CC[C@@](O)3COC)([H])[C@H]2C	0.27	5
34	2-(2'S-hydroxypropyl)-5-methyl-7-hydroxychromone/Aloesol	C13 H14 O4	234.09	CC(Cc1cc(=O)c2c(o1)cc(cc2C)O)O	0.26	5
60	3β,5α-Dihydroxy-(22E,24R)-ergosta-7,22-dien-6-one (35DE)	C28H44O3	428.6	C[C@H](/C=C/[C@H](C)C(C)C)[C@H]1CC[C@@H]2[C@@]1(CC[C@H]3C2=CC(=O)[C@@]4([C@@]3(CC[C@@H](C4)O)C)O)C	0.69	4
61	3β-Hydroxy-(22E,24R)-ergosta-5,8,22-trien-7-one (3HET)	C28H42O2	410.64	O[C@H](C1)CC[C@@]2(C)C1=CC(C3=C2CC[C@@]4(C)C3CCC4[C@@H](/C=C/[C@H](C)C(C)C)C)=O	0.68	4
64	4-Deoxybostrycin	C16H16O7	320.3	CC(C1)(O)C(O)CC2=C1C(C3=C(O)C(OC)=CC(O)=C3C2=O)=O	0.2	4
83	9-octadecenoic acid (z)-, methyl ester (9OAME)	C19H36O2	296.5	CCCCCCCCC=CCCCCCCCC(=O)OC	0.29	5
87	Allantoin	C4 H6 N4 O3	158.04	NC(=O)NC1NC(=O)NC1=O	0.88	5
96	Alterchromanone A	C18H22O7	350.4	C[C@@H](CCC[C@@H]1CC(=O)C2=C(C=C(C=C2O1)O)CC(=O)O)OC(=O)C	0.91	4
110	Alternaritins B	C23H32O5	388.5	CC(=CCC/C(=C/CC/C(=C/CC1=C(C(=CC(=C1O)OC)C(=O)O)O)/C)/C)C	0.38	4
113	Alternatain D	C18H20O9	380.35	OC1=C2C(C3=C[C@@](C[C@H](O)C(O)=O)(O)[C@@H](O)C[C@]3(C)OC2=O)=CC(OC)=C1	0.4	4
117	Alterporriol L	C32H26O14	602.14	COc1c(cc(c2c1C(=O)C1=C(C2=O)CC(C(C1O)(C)O)O)O)c1cc(O)c2c(c1OC)C(=O)c1c(C2=O)cc(c(c1)O)C	0.26	4
126	Anthrininone A	C25H28O10	488.49	C[C@]([C@H](O)C1)(O)CC(C1=C2O)=C(O3)C4=C2C(C=C(OC)[C@]45[C@@]([C@]63C[C@H](O)[C@H](O)CO6)([H])CC(C5)=O)=O	0.2	4
127	Anthrininones B	C24H23NO9	469.45	O=C1CC[C@H](C(OC)=O)N1CC(O)C2=C(O)C3=C(C(C(C=C(C)C(O)=C4)=C4C3=O)=O)C=C2OC	0.73	4
135	Bicycloalternarene F	C21 H30 O6	378.2	CC(=CCCC1(C)OC2=C(CC1O)C(=O)CCC2O)CCC=C(C(=O)O)C	0.7	4
136	Bostrycin	C16H16O8	336.29	C[C@@]1(CC2=C([C@@H]([C@H]1O)O)C(=C3C(=O)C=C(C(=O)C3=C2O)OC)O)O	0.37	4
137	Brassicicene B	C21 H34 O4	350.25	C[C@@H]1[C@@H]\2CC[C@@](/C2=C/[C@]3([C@H](CC(=C3C[C@@H]1O)C(C)C)O)C)(COC)O	0.49	5
138	Brassicicene F	C21 H32 O5	364.22	COCC1(O)CCC2C1=CC1C(=C(C(=O)C1(C)O)C(C)C)CC(C2C)O	0.52	4
147	Cholest-22-ene-21-ol, 3,5-dehydro-6-methoxy-, pivalate	C33H54O3	498.8	CC(C)/C=C/C(C(C)C1CCC2C1(CCC3C2CC(C45C3(CCC4C5)C)OC)C)OC(=O)C(C)(C)C	0.59	5
180	Helvolic acid	C33 H44 O8	568.3	CC(=O)OC1CC2(C(C1=C(C(=O)O)CCC=C(C)C)CCC1C2(C)C(=O)C(OC(=O)C)C2C1(C)C=CC(=O)C2C)C	1.02	4
192	Maculosin	C14 H16 N2 O3	260.12	O=C1NC(Cc2ccc(cc2)O)C(=O)N2C1CCC2	0.18	4
218	phomopsidin	C21 H30 O3	330.22	CC=C(C1C(=CC2C(C1C=CC=CC(=O)O)C(C)CCC2O)C)C	0.18	5
228	protocatechuic acid	C7 H6 O4	154.03	OC(=O)c1ccc(c(c1)O)O	0.23	4
259	Tricyclicalternan Q	C22H34O5	378.51	CC(O)(C)[C@H](O)C/C([H])=C(C)\[C@@](CC1)([H])[C@]([C@]1(C)O2)([H])CC3=C2C([H])CC(OC)C3=O	0.87	4
260	Tricyclicalternan R	C21H32O5	364.22	CC(O)(C)[C@H](O)C/C([H])=C(C)\[C@@](CC1)([H])[C@]([C@]1(C)O2)([H])CC3=C2C([H])CC(O)C3=O	0.89	4
261	Tricyclicalternan S 189	C21H30O4	346.47	O[C@@H](C(C)=C)C/C([H])=C(C)\[C@@](CC1)([H])[C@]([C@]1(C)O2)([H])CC3=C2[C@@H](O)CCC3=O	0.53	4
265	Tricyclicalternan W	C21H30O4	346.47	O/C(C/C([H])=C(C)\[C@@](CC1)([H])[C@]([C@]1(C)O2)([H])CC3=C2[C@@H](O)CCC3=O)=C(C)\C	0.85	4
270	Uridine	C9 H12 N2 O6	244.07	OCC1OC(C(C1O)O)n1ccc(=O)[nH]c1=O	1.07	6
271	ursolic acid	C30H48O3	456.7	C[C@@H]1CC[C@@]2(CC[C@@]3(C(=CC[C@H]4[C@]3(CC[C@@H]5[C@@]4(CC[C@@H](C5(C)C)O)C)C)[C@@H]2[C@H]1C)C)C(=O)O	0.66	4
272	vermixocin A	C21H24O6	372.4	CC1=CC2=C(C(=C1)O)OC3=C(C(=C(C=C3)[C@H](CC(C)C)O)OC)C(=O)OC2	0.91	5
276	Zinniol	C15 H22 O4	266.15	COc1c(C)c(OCC=C(C)C)cc(c1CO)CO	0.26	4
278	β-sitosterol (sitosterol)	C29H50O	414.7	CC[C@H](CC[C@@H](C)[C@H]1CC[C@@H]2[C@@]1(CC[C@H]3[C@H]2CC=C4[C@@]3(CC[C@@H](C4)O)C)C)C(C)C	0.78	4
	Total compunds = 33
	above 4 =23
	above 5 =9
	above 6 =1

## Sheet: S4
	Molecular Docking result analysis using LigPlot+
	Note: Hydrogen bond denoted as "1" and Hydrophobic bond denoted as "0"																S2 Subsite																				S2 subsite	S2 subsite	S2 extensive	S2 extensive
																	interaction with acidic P2 residues																				dyad of acidic residues	dyad of acidic residues	form the base of the extended pocket	form the base of the extended pocket
	Compound Name	Binding affinity(kcal/mol)	H-bond	His37	Tyr48	Asn51	Leu55	Ile63	Asp104	Ser106	Ile107	Pro109	Leu115	Lys122	Gln123	Try124	Arg125	His126	Ser127	Thr129	Gln153	Try154	Val155	Thr156	Trp157	Pro159	Asn169	Asn170	Glu191	Asp192	Tyr195	Ile198	Thr199	Asp200	Trp201	Glu204	Glu205	Glu206	Val207	Ser209	Tyr211	Tyr238	Phe240	Lys250	Val252	Arg253	Ile346	Glu347	Met348
	Alterporriol L	-10.28	2																																			1	0	0
	ursolic acid	-9.133	1					0	0	0	0	0	0									0	0	0	0	0
	Anthrininone A	-8.801	4
	Anthrininones B	-8.692	5																																			2		0
	Tricyclicalternan Q	-8.485	4
	3HET	-8.427	2																																		0	0		0
	Tricyclicalternan W	-8.35	2
	15-hydroxytricycloalternarenes	-8.283	6														0																				1	0		1
	Cholest-22-ene-21-ol 3 5-dehydro 6 methoxy pivalate	-8.001	2		0	0	0
	35DE	-7.985	1											0	0	0														0													0	0	0	0
	Bicycloalternarene F	-7.967	4																																		1	0	0	0
	Alternatain D	-7.95	5																																			1		1
	sitosterol	-7.821	1																																		0	1		0
	Bostrycin	-7.76	5																																		1	2	0	1
	vermixocin A	-7.725	2																																			1		1
	Tricyclicalternan S	-7.639	2
	Helvolic acid	-7.57	3	0
	4-Deoxybostrycin	-7.568	4														0
	Tricyclicalternan R	-7.553	5																																			1	0	0
	Maculosin	-7.533	2												0	0			0	0	1						1	0	0		0	0	0		0						0
	Brassicicene B	-7.391	2												0	0																										0	0		0
	phomopsidin	-7.223	4														0
	AlterchromanoneA	-7.141	3												0	1			0	0	0								0	0	0	0									0			0	0	1
	Alternaritins B	-7.069	2																																													0	0
	Brassicicene F	-7.068	4													0																										1	0
	12epoxy	-6.898	2
	Aloesol	-6.859	3
	17-O-methyltricycloalternarene D	-6.686	0
	Uridine	-6.461	3												0	0																										1	0		0
	protocatechuic acid	-6.102	3												0	0					1										0	0	0	0	0	1					1
	Zinniol	-5.94	3																																												0	1	0
	Allantoin	-5.735	3												0	0			0		1									1	0	0			0						1
	9 octadecenoicacid z methyl ester	-4.609	1											0	0	0																										0	0	0	0
	Linagliptin (control)	-8.729	6														0																				1	0		1
[truncated: 73 more columns]

## Sheet: S5
	LigPlot+ results with detailed analysis of the protein-ligand complex at 300 ns of simulation.
	Note: Hydrogen bond denoted as "1" and Hydrophobic bond denoted as "0"																			S2 Subsite																		S2 subsite	S2 subsite	S2 extensive	S2 extensive
																				interaction with acidic P2 residues																		dyad of acidic residues	dyad of acidic residues	form the base of the extended pocket	form the base of the extended pocket
		Times (ns)	H-bond	Hydrophobic		His37	Tyr48	Asn51	Leu57	Leu55	Ile63	Asp104	Ser106	Ile107	Pro109	Leu115	Lys122	Gln123	Try124	Arg125	His126	Ser127	Thr129	Gln153	Try154	Val155	Thr156	Trp157	Pro159	Asn169	Asn170	Glu191	Asp192	Tyr195	Ile198	Thr199	Trp201	Glu205	Glu206	Val207	Ser209	Tyr211	Tyr238	Phe240	Lys250	Val252	Arg253	Glu347	Met348
	Linagliptin_control	300ns	2	6																0																			1
	Anthrininones_B	300ns	3	8			0
	Alternatain_D	300ns	3	5																																		0	1
	Bicycloalternarene_F	300ns	1	2
	Bostrycin	300ns	3	3
	Tricyclicalternan_R	300ns	2	3
	15-hydroxytricycloalternarenes	300ns	1	4					0
[truncated: 80 more columns]
